# Supplementary material for: Anthropometric indicators may explain the high incidence of follicular lymphoma in Europeans: Results from a bidirectional two-sample two-step Mendelian randomisation
Source: Research Square preprint supplement (doi:10.21203/rs.3.rs-3440102/v1), 2023-10-30
Supplement: Supplementary file 1 [file e0bccd8ffa8a1111dec85564.xlsx]

## Sheet: Table 1
Table 1 - Details of GWAS datasets included in this study.
Value Type	Unit	Mean±SD	Database source	Consortium	Cases	Controls	GWAS ID
Continuous	Kg/m2	27.334 ± 4.755	UK Biobank	MRC-IEU	461460	NA	ukb-b-19953
Continuous	kg	53.099 ± 11.4488	UK Biobank	MRC-IEU	454850	NA	ukb-b-13354
Continuous	kg	24.763 ± 9.494	UK Biobank	MRC-IEU	454137	NA	ukb-b-19393
Continuous	cm	168.527 ± 9.27574	UK Biobank	MRC-IEU	461950	NA	ukb-b-10787
Continuous	cm	90.201 ± 13.4112	UK Biobank	MRC-IEU	462166	NA	ukb-b-9405
Continuous	cm	99.857 ± 9.256	UK Biobank	MRC-IEU	462117	NA	ukb-b-15590
Continuous	kg	77.822 ± 15.838	UK Biobank	MRC-IEU	461632	NA	ukb-b-11842
NA	NA	NA	FinnGen	NA	522	180756	finn-b-CD2_FOLLICULAR_LYMPHOMA_EXALLC
NA	NA	NA	FinnGen	NA	209	174006	finn-b-C3_DLBCL_EXALLC
Continuous	KJ	6442.640 ± 1357.830	UK Biobank	Neale Lab	331307	NA	ukb-a-268

## Sheet: Table 2
Table 2 - Cochrane’s Q test of Heterogeneity.
Outcome	Exposure	Method	Q	Q degrees of freedom	Q p-value
FL	BMI	MR Egger	304.054	335	0.886574
FL	BMI	Inverse variance weighted	304.168	336	0.89308
FL	WBFM	MR Egger	347.072	359	0.664663
FL	WBFM	Inverse variance weighted	349	360	0.65147
FL	WBFFM	MR Egger	456.519	448	0.380157
FL	WBFFM	Inverse variance weighted	456.905	449	0.388023
FL	WC	MR Egger	576.053	543	0.157816
FL	WC	Inverse variance weighted	576.651	544	0.160882
FL	HC	MR Egger	338.657	352	0.685868
FL	HC	Inverse variance weighted	342.067	353	0.651965
FL	SH	MR Egger	619.343	641	0.723457
FL	SH	Inverse variance weighted	619.439	642	0.731876
FL	Wt	MR Egger	449.797	429	0.235293
FL	Wt	Inverse variance weighted	455.553	430	0.190163
DLBCL	BMI	MR Egger	438.331	395	0.065248
DLBCL	BMI	Inverse variance weighted	438.419	396	0.0694253
DLBCL	WBFM	MR Egger	395.106	385	0.350109
DLBCL	WBFM	Inverse variance weighted	395.508	386	0.358155
DLBCL	WBFFM	MR Egger	427.808	447	0.735304
DLBCL	WBFFM	Inverse variance weighted	432.372	448	0.69355
DLBCL	WC	MR Egger	324.199	296	0.12481
DLBCL	WC	Inverse variance weighted	326.822	297	0.112749
DLBCL	HC	MR Egger	344.965	330	0.274322
DLBCL	HC	Inverse variance weighted	346.341	331	0.269902
DLBCL	SH	MR Egger	640.381	621	0.286648
DLBCL	SH	Inverse variance weighted	642.1	622	0.28004
DLBCL	Wt	MR Egger	400.249	412	0.651741
DLBCL	Wt	Inverse variance weighted	403.28	413	0.624623

## Sheet: Table3
Table 3-MR Egger intercept test of directional pleiotropy.
Outcome	Exposure	Intercept	Se	p-value
FL	BMI	0.00369834	0.0109504	0.735774
FL	WBFM	-0.0143125	0.0103082	0.165857
FL	WBFFM	-0.00515737	0.00838544	0.538841
FL	HC	-0.01864	0.010094	0.0656374
FL	WC	-0.00652652	0.0086995	0.453449
FL	SH	0.00188678	0.00609369	0.756944
FL	Wt	-0.0209605	0.00894611	0.0195868
DLBCL	BMI	0.0048878	0.0174032	0.778967
DLBCL	WBFM	-0.0104635	0.0167045	0.531433
DLBCL	WBFFM	-0.0280829	0.0131439	0.0331759
DLBCL	HC	-0.0209587	0.0182654	0.252025
DLBCL	WC	-0.0306135	0.0197815	0.122791
DLBCL	SH	-0.0126868	0.00982649	0.197154
DLBCL	Wt	-0.0264912	0.0152173	0.0824544

## Sheet: Table4
Table 4 - MRPROSSO test of horizontal pleiotropy.
Outcome	Exposuer	Global test p-value
FL	BMI	0.906
FL	WBFM	0.65
FL	WBFFM	0.507667
FL	WC	0.165667
FL	HC	0.654667
FL	SH	0.732
FL	Wt	0.172667
DLBCL	BMI	0.0676667
DLBCL	WBFM	0.0899
DLBCL	WBFFM	0.704
DLBCL	WC	0.116667
DLBCL	HC	0.263
DLBCL	SH	0.279333
DLBCL	Wt	0.645667

## Sheet: Table 5
Table 5 - SNPs excluded in this stduy and the basis for deletion.
Exposure	Outcome	Removed SNPs	Outlier	Palindromic Sequence Allele	Incompatible Allele	Steiger Filtering	Confunders
							Smoke	Hair Dyes Use	HBV infection	HCV Infection	EBV Infection	HP Infection	Radiation
BMI	FL	rs7928320	FALSE	FALSE	TRUE	FALSE	FALSE	FALSE	FALSE	FALSE	FALSE	FALSE	FALSE
BMI	FL	rs9674487	FALSE	FALSE	TRUE	FALSE	FALSE	FALSE	FALSE	FALSE	FALSE	FALSE	FALSE
BMI	FL	rs10182416	FALSE	FALSE	FALSE	FALSE	TRUE	FALSE	FALSE	FALSE	FALSE	FALSE	FALSE
BMI	FL	rs11012732	FALSE	FALSE	FALSE	FALSE	TRUE	FALSE	FALSE	FALSE	FALSE	FALSE	FALSE
BMI	FL	rs12089815	FALSE	FALSE	FALSE	FALSE	TRUE	FALSE	FALSE	FALSE	FALSE	FALSE	FALSE
BMI	FL	rs12889639	FALSE	FALSE	FALSE	FALSE	TRUE	FALSE	FALSE	FALSE	FALSE	FALSE	FALSE
BMI	FL	rs12937411	FALSE	FALSE	FALSE	FALSE	TRUE	FALSE	FALSE	FALSE	FALSE	FALSE	FALSE
BMI	FL	rs13420048	FALSE	FALSE	FALSE	FALSE	TRUE	FALSE	FALSE	FALSE	FALSE	FALSE	FALSE
BMI	FL	rs215634	FALSE	FALSE	FALSE	FALSE	TRUE	FALSE	FALSE	FALSE	FALSE	FALSE	FALSE
BMI	FL	rs317656	FALSE	FALSE	FALSE	FALSE	TRUE	FALSE	FALSE	FALSE	FALSE	FALSE	FALSE
BMI	FL	rs329118	FALSE	FALSE	FALSE	FALSE	TRUE	FALSE	FALSE	FALSE	FALSE	FALSE	FALSE
BMI	FL	rs34517439	FALSE	FALSE	FALSE	FALSE	TRUE	FALSE	FALSE	FALSE	FALSE	FALSE	FALSE
BMI	FL	rs35154326	FALSE	FALSE	FALSE	FALSE	TRUE	FALSE	FALSE	FALSE	FALSE	FALSE	FALSE
BMI	FL	rs3845344	FALSE	FALSE	FALSE	FALSE	TRUE	FALSE	FALSE	FALSE	FALSE	FALSE	FALSE
BMI	FL	rs3901286	FALSE	FALSE	FALSE	FALSE	TRUE	FALSE	FALSE	FALSE	FALSE	FALSE	FALSE
BMI	FL	rs60764613	FALSE	FALSE	FALSE	FALSE	TRUE	FALSE	FALSE	FALSE	FALSE	FALSE	FALSE
BMI	FL	rs6265	FALSE	FALSE	FALSE	FALSE	TRUE	FALSE	FALSE	FALSE	FALSE	FALSE	FALSE
BMI	FL	rs6567160	FALSE	FALSE	FALSE	FALSE	TRUE	FALSE	FALSE	FALSE	FALSE	FALSE	FALSE
BMI	FL	rs6682438	FALSE	FALSE	FALSE	FALSE	TRUE	FALSE	FALSE	FALSE	FALSE	FALSE	FALSE
BMI	FL	rs6744646	FALSE	FALSE	FALSE	FALSE	TRUE	FALSE	FALSE	FALSE	FALSE	FALSE	FALSE
BMI	FL	rs6938973	FALSE	FALSE	FALSE	FALSE	TRUE	FALSE	FALSE	FALSE	FALSE	FALSE	FALSE
BMI	FL	rs7024334	FALSE	FALSE	FALSE	FALSE	TRUE	FALSE	FALSE	FALSE	FALSE	FALSE	FALSE
BMI	FL	rs74750282	FALSE	FALSE	FALSE	FALSE	TRUE	FALSE	FALSE	FALSE	FALSE	FALSE	FALSE
BMI	FL	rs75499503	FALSE	FALSE	FALSE	FALSE	TRUE	FALSE	FALSE	FALSE	FALSE	FALSE	FALSE
BMI	FL	rs78605811	FALSE	FALSE	FALSE	FALSE	TRUE	FALSE	FALSE	FALSE	FALSE	FALSE	FALSE
BMI	FL	rs862320	FALSE	FALSE	FALSE	FALSE	TRUE	FALSE	FALSE	FALSE	FALSE	FALSE	FALSE
BMI	FL	rs9515446	FALSE	FALSE	FALSE	FALSE	TRUE	FALSE	FALSE	FALSE	FALSE	FALSE	FALSE
BMI	FL	rs9835772	FALSE	FALSE	FALSE	FALSE	TRUE	FALSE	FALSE	FALSE	FALSE	FALSE	FALSE
BMI	FL	rs9876664	FALSE	FALSE	FALSE	FALSE	TRUE	FALSE	FALSE	FALSE	FALSE	FALSE	FALSE
BMI	FL	rs10160769	FALSE	TRUE	FALSE	FALSE	FALSE	FALSE	FALSE	FALSE	FALSE	FALSE	FALSE
BMI	FL	rs10423928	FALSE	TRUE	FALSE	FALSE	FALSE	FALSE	FALSE	FALSE	FALSE	FALSE	FALSE
BMI	FL	rs10809621	FALSE	TRUE	FALSE	FALSE	FALSE	FALSE	FALSE	FALSE	FALSE	FALSE	FALSE
BMI	FL	rs111689389	FALSE	TRUE	FALSE	FALSE	FALSE	FALSE	FALSE	FALSE	FALSE	FALSE	FALSE
BMI	FL	rs1126930	FALSE	TRUE	FALSE	FALSE	FALSE	FALSE	FALSE	FALSE	FALSE	FALSE	FALSE
BMI	FL	rs11610621	FALSE	TRUE	FALSE	FALSE	FALSE	FALSE	FALSE	FALSE	FALSE	FALSE	FALSE
BMI	FL	rs117118217	FALSE	TRUE	FALSE	FALSE	FALSE	FALSE	FALSE	FALSE	FALSE	FALSE	FALSE
BMI	FL	rs1286058	FALSE	TRUE	FALSE	FALSE	FALSE	FALSE	FALSE	FALSE	FALSE	FALSE	FALSE
BMI	FL	rs13097918	FALSE	TRUE	FALSE	FALSE	FALSE	FALSE	FALSE	FALSE	FALSE	FALSE	FALSE
BMI	FL	rs13218383	FALSE	TRUE	FALSE	FALSE	FALSE	FALSE	FALSE	FALSE	FALSE	FALSE	FALSE
BMI	FL	rs13642	FALSE	TRUE	FALSE	FALSE	FALSE	FALSE	FALSE	FALSE	FALSE	FALSE	FALSE
BMI	FL	rs1438945	FALSE	TRUE	FALSE	FALSE	FALSE	FALSE	FALSE	FALSE	FALSE	FALSE	FALSE
BMI	FL	rs156201	FALSE	TRUE	FALSE	FALSE	FALSE	FALSE	FALSE	FALSE	FALSE	FALSE	FALSE
BMI	FL	rs17132130	FALSE	TRUE	FALSE	FALSE	FALSE	FALSE	FALSE	FALSE	FALSE	FALSE	FALSE
BMI	FL	rs17218879	FALSE	TRUE	FALSE	FALSE	FALSE	FALSE	FALSE	FALSE	FALSE	FALSE	FALSE
BMI	FL	rs17446299	FALSE	TRUE	FALSE	FALSE	FALSE	FALSE	FALSE	FALSE	FALSE	FALSE	FALSE
BMI	FL	rs17668356	FALSE	TRUE	FALSE	FALSE	FALSE	FALSE	FALSE	FALSE	FALSE	FALSE	FALSE
BMI	FL	rs1793636	FALSE	TRUE	FALSE	FALSE	FALSE	FALSE	FALSE	FALSE	FALSE	FALSE	FALSE
BMI	FL	rs2075466	FALSE	TRUE	FALSE	FALSE	FALSE	FALSE	FALSE	FALSE	FALSE	FALSE	FALSE
BMI	FL	rs2133561	FALSE	TRUE	FALSE	FALSE	FALSE	FALSE	FALSE	FALSE	FALSE	FALSE	FALSE
BMI	FL	rs2875762	FALSE	TRUE	FALSE	FALSE	FALSE	FALSE	FALSE	FALSE	FALSE	FALSE	FALSE
BMI	FL	rs2922757	FALSE	TRUE	FALSE	FALSE	FALSE	FALSE	FALSE	FALSE	FALSE	FALSE	FALSE
BMI	FL	rs32421	FALSE	TRUE	FALSE	FALSE	FALSE	FALSE	FALSE	FALSE	FALSE	FALSE	FALSE
BMI	FL	rs35697691	FALSE	TRUE	FALSE	FALSE	FALSE	FALSE	FALSE	FALSE	FALSE	FALSE	FALSE
BMI	FL	rs3851998	FALSE	TRUE	FALSE	FALSE	FALSE	FALSE	FALSE	FALSE	FALSE	FALSE	FALSE
BMI	FL	rs406388	FALSE	TRUE	FALSE	FALSE	FALSE	FALSE	FALSE	FALSE	FALSE	FALSE	FALSE
BMI	FL	rs5011579	FALSE	TRUE	FALSE	FALSE	FALSE	FALSE	FALSE	FALSE	FALSE	FALSE	FALSE
BMI	FL	rs56161855	FALSE	TRUE	FALSE	FALSE	FALSE	FALSE	FALSE	FALSE	FALSE	FALSE	FALSE
BMI	FL	rs62020775	FALSE	TRUE	FALSE	FALSE	FALSE	FALSE	FALSE	FALSE	FALSE	FALSE	FALSE
BMI	FL	rs62176243	FALSE	TRUE	FALSE	FALSE	FALSE	FALSE	FALSE	FALSE	FALSE	FALSE	FALSE
BMI	FL	rs62190049	FALSE	TRUE	FALSE	FALSE	FALSE	FALSE	FALSE	FALSE	FALSE	FALSE	FALSE
BMI	FL	rs62407562	FALSE	TRUE	FALSE	FALSE	FALSE	FALSE	FALSE	FALSE	FALSE	FALSE	FALSE
BMI	FL	rs6561937	FALSE	TRUE	FALSE	FALSE	FALSE	FALSE	FALSE	FALSE	FALSE	FALSE	FALSE
BMI	FL	rs6710091	FALSE	TRUE	FALSE	FALSE	FALSE	FALSE	FALSE	FALSE	FALSE	FALSE	FALSE
BMI	FL	rs6713781	FALSE	TRUE	FALSE	FALSE	FALSE	FALSE	FALSE	FALSE	FALSE	FALSE	FALSE
BMI	FL	rs6769617	FALSE	TRUE	FALSE	FALSE	FALSE	FALSE	FALSE	FALSE	FALSE	FALSE	FALSE
BMI	FL	rs6774894	FALSE	TRUE	FALSE	FALSE	FALSE	FALSE	FALSE	FALSE	FALSE	FALSE	FALSE
BMI	FL	rs705158	FALSE	TRUE	FALSE	FALSE	FALSE	FALSE	FALSE	FALSE	FALSE	FALSE	FALSE
BMI	FL	rs7206608	FALSE	TRUE	FALSE	FALSE	FALSE	FALSE	FALSE	FALSE	FALSE	FALSE	FALSE
BMI	FL	rs73213484	FALSE	TRUE	FALSE	FALSE	FALSE	FALSE	FALSE	FALSE	FALSE	FALSE	FALSE
BMI	FL	rs7442885	FALSE	TRUE	FALSE	FALSE	FALSE	FALSE	FALSE	FALSE	FALSE	FALSE	FALSE
BMI	FL	rs7539903	FALSE	TRUE	FALSE	FALSE	FALSE	FALSE	FALSE	FALSE	FALSE	FALSE	FALSE
BMI	FL	rs754635	FALSE	TRUE	FALSE	FALSE	FALSE	FALSE	FALSE	FALSE	FALSE	FALSE	FALSE
BMI	FL	rs7619139	FALSE	TRUE	FALSE	FALSE	FALSE	FALSE	FALSE	FALSE	FALSE	FALSE	FALSE
BMI	FL	rs76702514	FALSE	TRUE	FALSE	FALSE	FALSE	FALSE	FALSE	FALSE	FALSE	FALSE	FALSE
BMI	FL	rs7761673	FALSE	TRUE	FALSE	FALSE	FALSE	FALSE	FALSE	FALSE	FALSE	FALSE	FALSE
BMI	FL	rs80135274	FALSE	TRUE	FALSE	FALSE	FALSE	FALSE	FALSE	FALSE	FALSE	FALSE	FALSE
BMI	FL	rs8020365	FALSE	TRUE	FALSE	FALSE	FALSE	FALSE	FALSE	FALSE	FALSE	FALSE	FALSE
BMI	FL	rs8024137	FALSE	TRUE	FALSE	FALSE	FALSE	FALSE	FALSE	FALSE	FALSE	FALSE	FALSE
BMI	FL	rs8089514	FALSE	TRUE	FALSE	FALSE	FALSE	FALSE	FALSE	FALSE	FALSE	FALSE	FALSE
BMI	FL	rs909001	FALSE	TRUE	FALSE	FALSE	FALSE	FALSE	FALSE	FALSE	FALSE	FALSE	FALSE
BMI	FL	rs7928320	FALSE	FALSE	TRUE	FALSE	FALSE	FALSE	FALSE	FALSE	FALSE	FALSE	FALSE
BMI	FL	rs9674487	FALSE	FALSE	TRUE	FALSE	FALSE	FALSE	FALSE	FALSE	FALSE	FALSE	FALSE
BMI	FL	rs10832778	FALSE	TRUE	FALSE	FALSE	FALSE	FALSE	FALSE	FALSE	FALSE	FALSE	FALSE
BMI	FL	rs10887578	FALSE	TRUE	FALSE	FALSE	FALSE	FALSE	FALSE	FALSE	FALSE	FALSE	FALSE
BMI	FL	rs11250094	FALSE	TRUE	FALSE	FALSE	FALSE	FALSE	FALSE	FALSE	FALSE	FALSE	FALSE
BMI	FL	rs11634851	FALSE	TRUE	FALSE	FALSE	FALSE	FALSE	FALSE	FALSE	FALSE	FALSE	FALSE
BMI	FL	rs12507026	FALSE	TRUE	FALSE	FALSE	FALSE	FALSE	FALSE	FALSE	FALSE	FALSE	FALSE
BMI	FL	rs1454687	FALSE	TRUE	FALSE	FALSE	FALSE	FALSE	FALSE	FALSE	FALSE	FALSE	FALSE
BMI	FL	rs1608113	FALSE	TRUE	FALSE	FALSE	FALSE	FALSE	FALSE	FALSE	FALSE	FALSE	FALSE
BMI	FL	rs1860750	FALSE	TRUE	FALSE	FALSE	FALSE	FALSE	FALSE	FALSE	FALSE	FALSE	FALSE
BMI	FL	rs2253310	FALSE	TRUE	FALSE	FALSE	FALSE	FALSE	FALSE	FALSE	FALSE	FALSE	FALSE
BMI	FL	rs2396625	FALSE	TRUE	FALSE	FALSE	FALSE	FALSE	FALSE	FALSE	FALSE	FALSE	FALSE
BMI	FL	rs2618039	FALSE	TRUE	FALSE	FALSE	FALSE	FALSE	FALSE	FALSE	FALSE	FALSE	FALSE
BMI	FL	rs347551	FALSE	TRUE	FALSE	FALSE	FALSE	FALSE	FALSE	FALSE	FALSE	FALSE	FALSE
BMI	FL	rs355777	FALSE	TRUE	FALSE	FALSE	FALSE	FALSE	FALSE	FALSE	FALSE	FALSE	FALSE
BMI	FL	rs396755	FALSE	TRUE	FALSE	FALSE	FALSE	FALSE	FALSE	FALSE	FALSE	FALSE	FALSE
BMI	FL	rs4419475	FALSE	TRUE	FALSE	FALSE	FALSE	FALSE	FALSE	FALSE	FALSE	FALSE	FALSE
BMI	FL	rs4737188	FALSE	TRUE	FALSE	FALSE	FALSE	FALSE	FALSE	FALSE	FALSE	FALSE	FALSE
BMI	FL	rs59086897	FALSE	TRUE	FALSE	FALSE	FALSE	FALSE	FALSE	FALSE	FALSE	FALSE	FALSE
BMI	FL	rs6597975	FALSE	TRUE	FALSE	FALSE	FALSE	FALSE	FALSE	FALSE	FALSE	FALSE	FALSE
BMI	FL	rs7568228	FALSE	TRUE	FALSE	FALSE	FALSE	FALSE	FALSE	FALSE	FALSE	FALSE	FALSE
BMI	FL	rs765874	FALSE	TRUE	FALSE	FALSE	FALSE	FALSE	FALSE	FALSE	FALSE	FALSE	FALSE
BMI	FL	rs7704382	FALSE	TRUE	FALSE	FALSE	FALSE	FALSE	FALSE	FALSE	FALSE	FALSE	FALSE
BMI	FL	rs9388446	FALSE	TRUE	FALSE	FALSE	FALSE	FALSE	FALSE	FALSE	FALSE	FALSE	FALSE
BMI	FL	rs961498	FALSE	TRUE	FALSE	FALSE	FALSE	FALSE	FALSE	FALSE	FALSE	FALSE	FALSE
WBFM	FL	rs12926311	FALSE	FALSE	TRUE	FALSE	FALSE	FALSE	FALSE	FALSE	FALSE	FALSE	FALSE
WBFM	FL	rs2943634	FALSE	FALSE	TRUE	FALSE	FALSE	FALSE	FALSE	FALSE	FALSE	FALSE	FALSE
WBFM	FL	rs10887578	FALSE	TRUE	FALSE	FALSE	FALSE	FALSE	FALSE	FALSE	FALSE	FALSE	FALSE
WBFM	FL	rs11208779	FALSE	TRUE	FALSE	FALSE	FALSE	FALSE	FALSE	FALSE	FALSE	FALSE	FALSE
WBFM	FL	rs11778934	FALSE	TRUE	FALSE	FALSE	FALSE	FALSE	FALSE	FALSE	FALSE	FALSE	FALSE
WBFM	FL	rs1216547	FALSE	TRUE	FALSE	FALSE	FALSE	FALSE	FALSE	FALSE	FALSE	FALSE	FALSE
WBFM	FL	rs1454687	FALSE	TRUE	FALSE	FALSE	FALSE	FALSE	FALSE	FALSE	FALSE	FALSE	FALSE
WBFM	FL	rs2143975	FALSE	TRUE	FALSE	FALSE	FALSE	FALSE	FALSE	FALSE	FALSE	FALSE	FALSE
WBFM	FL	rs2396625	FALSE	TRUE	FALSE	FALSE	FALSE	FALSE	FALSE	FALSE	FALSE	FALSE	FALSE
WBFM	FL	rs2470937	FALSE	TRUE	FALSE	FALSE	FALSE	FALSE	FALSE	FALSE	FALSE	FALSE	FALSE
WBFM	FL	rs2692741	FALSE	TRUE	FALSE	FALSE	FALSE	FALSE	FALSE	FALSE	FALSE	FALSE	FALSE
WBFM	FL	rs347551	FALSE	TRUE	FALSE	FALSE	FALSE	FALSE	FALSE	FALSE	FALSE	FALSE	FALSE
WBFM	FL	rs361222	FALSE	TRUE	FALSE	FALSE	FALSE	FALSE	FALSE	FALSE	FALSE	FALSE	FALSE
WBFM	FL	rs396755	FALSE	TRUE	FALSE	FALSE	FALSE	FALSE	FALSE	FALSE	FALSE	FALSE	FALSE
WBFM	FL	rs4419475	FALSE	TRUE	FALSE	FALSE	FALSE	FALSE	FALSE	FALSE	FALSE	FALSE	FALSE
WBFM	FL	rs4757136	FALSE	TRUE	FALSE	FALSE	FALSE	FALSE	FALSE	FALSE	FALSE	FALSE	FALSE
WBFM	FL	rs55685371	FALSE	TRUE	FALSE	FALSE	FALSE	FALSE	FALSE	FALSE	FALSE	FALSE	FALSE
WBFM	FL	rs765874	FALSE	TRUE	FALSE	FALSE	FALSE	FALSE	FALSE	FALSE	FALSE	FALSE	FALSE
WBFM	FL	rs912690	FALSE	TRUE	FALSE	FALSE	FALSE	FALSE	FALSE	FALSE	FALSE	FALSE	FALSE
BMI	FL	rs10832778	FALSE	TRUE	FALSE	FALSE	FALSE	FALSE	FALSE	FALSE	FALSE	FALSE	FALSE
BMI	FL	rs10887578	FALSE	TRUE	FALSE	FALSE	FALSE	FALSE	FALSE	FALSE	FALSE	FALSE	FALSE
BMI	FL	rs11250094	FALSE	TRUE	FALSE	FALSE	FALSE	FALSE	FALSE	FALSE	FALSE	FALSE	FALSE
BMI	FL	rs11634851	FALSE	TRUE	FALSE	FALSE	FALSE	FALSE	FALSE	FALSE	FALSE	FALSE	FALSE
BMI	FL	rs12507026	FALSE	TRUE	FALSE	FALSE	FALSE	FALSE	FALSE	FALSE	FALSE	FALSE	FALSE
BMI	FL	rs1454687	FALSE	TRUE	FALSE	FALSE	FALSE	FALSE	FALSE	FALSE	FALSE	FALSE	FALSE
BMI	FL	rs1608113	FALSE	TRUE	FALSE	FALSE	FALSE	FALSE	FALSE	FALSE	FALSE	FALSE	FALSE
BMI	FL	rs1860750	FALSE	TRUE	FALSE	FALSE	FALSE	FALSE	FALSE	FALSE	FALSE	FALSE	FALSE
BMI	FL	rs2253310	FALSE	TRUE	FALSE	FALSE	FALSE	FALSE	FALSE	FALSE	FALSE	FALSE	FALSE
BMI	FL	rs2396625	FALSE	TRUE	FALSE	FALSE	FALSE	FALSE	FALSE	FALSE	FALSE	FALSE	FALSE
BMI	FL	rs2618039	FALSE	TRUE	FALSE	FALSE	FALSE	FALSE	FALSE	FALSE	FALSE	FALSE	FALSE
BMI	FL	rs347551	FALSE	TRUE	FALSE	FALSE	FALSE	FALSE	FALSE	FALSE	FALSE	FALSE	FALSE
BMI	FL	rs355777	FALSE	TRUE	FALSE	FALSE	FALSE	FALSE	FALSE	FALSE	FALSE	FALSE	FALSE
BMI	FL	rs396755	FALSE	TRUE	FALSE	FALSE	FALSE	FALSE	FALSE	FALSE	FALSE	FALSE	FALSE
BMI	FL	rs4419475	FALSE	TRUE	FALSE	FALSE	FALSE	FALSE	FALSE	FALSE	FALSE	FALSE	FALSE
BMI	FL	rs4737188	FALSE	TRUE	FALSE	FALSE	FALSE	FALSE	FALSE	FALSE	FALSE	FALSE	FALSE
BMI	FL	rs59086897	FALSE	TRUE	FALSE	FALSE	FALSE	FALSE	FALSE	FALSE	FALSE	FALSE	FALSE
BMI	FL	rs6597975	FALSE	TRUE	FALSE	FALSE	FALSE	FALSE	FALSE	FALSE	FALSE	FALSE	FALSE
BMI	FL	rs7568228	FALSE	TRUE	FALSE	FALSE	FALSE	FALSE	FALSE	FALSE	FALSE	FALSE	FALSE
BMI	FL	rs765874	FALSE	TRUE	FALSE	FALSE	FALSE	FALSE	FALSE	FALSE	FALSE	FALSE	FALSE
BMI	FL	rs7704382	FALSE	TRUE	FALSE	FALSE	FALSE	FALSE	FALSE	FALSE	FALSE	FALSE	FALSE
BMI	FL	rs9388446	FALSE	TRUE	FALSE	FALSE	FALSE	FALSE	FALSE	FALSE	FALSE	FALSE	FALSE
BMI	FL	rs961498	FALSE	TRUE	FALSE	FALSE	FALSE	FALSE	FALSE	FALSE	FALSE	FALSE	FALSE
WBFM	FL	rs10423928	FALSE	TRUE	FALSE	FALSE	FALSE	FALSE	FALSE	FALSE	FALSE	FALSE	FALSE
WBFM	FL	rs10499014	FALSE	TRUE	FALSE	FALSE	FALSE	FALSE	FALSE	FALSE	FALSE	FALSE	FALSE
WBFM	FL	rs11075256	FALSE	TRUE	FALSE	FALSE	FALSE	FALSE	FALSE	FALSE	FALSE	FALSE	FALSE
WBFM	FL	rs11129446	FALSE	TRUE	FALSE	FALSE	FALSE	FALSE	FALSE	FALSE	FALSE	FALSE	FALSE
WBFM	FL	rs11152135	FALSE	TRUE	FALSE	FALSE	FALSE	FALSE	FALSE	FALSE	FALSE	FALSE	FALSE
WBFM	FL	rs11664848	FALSE	TRUE	FALSE	FALSE	FALSE	FALSE	FALSE	FALSE	FALSE	FALSE	FALSE
WBFM	FL	rs117176448	FALSE	TRUE	FALSE	FALSE	FALSE	FALSE	FALSE	FALSE	FALSE	FALSE	FALSE
WBFM	FL	rs11926024	FALSE	TRUE	FALSE	FALSE	FALSE	FALSE	FALSE	FALSE	FALSE	FALSE	FALSE
WBFM	FL	rs13218383	FALSE	TRUE	FALSE	FALSE	FALSE	FALSE	FALSE	FALSE	FALSE	FALSE	FALSE
WBFM	FL	rs1383723	FALSE	TRUE	FALSE	FALSE	FALSE	FALSE	FALSE	FALSE	FALSE	FALSE	FALSE
WBFM	FL	rs148636479	FALSE	TRUE	FALSE	FALSE	FALSE	FALSE	FALSE	FALSE	FALSE	FALSE	FALSE
WBFM	FL	rs1568488	FALSE	TRUE	FALSE	FALSE	FALSE	FALSE	FALSE	FALSE	FALSE	FALSE	FALSE
WBFM	FL	rs17668356	FALSE	TRUE	FALSE	FALSE	FALSE	FALSE	FALSE	FALSE	FALSE	FALSE	FALSE
WBFM	FL	rs17681686	FALSE	TRUE	FALSE	FALSE	FALSE	FALSE	FALSE	FALSE	FALSE	FALSE	FALSE
WBFM	FL	rs17744603	FALSE	TRUE	FALSE	FALSE	FALSE	FALSE	FALSE	FALSE	FALSE	FALSE	FALSE
WBFM	FL	rs1782508	FALSE	TRUE	FALSE	FALSE	FALSE	FALSE	FALSE	FALSE	FALSE	FALSE	FALSE
WBFM	FL	rs1801282	FALSE	TRUE	FALSE	FALSE	FALSE	FALSE	FALSE	FALSE	FALSE	FALSE	FALSE
WBFM	FL	rs2249825	FALSE	TRUE	FALSE	FALSE	FALSE	FALSE	FALSE	FALSE	FALSE	FALSE	FALSE
WBFM	FL	rs35099456	FALSE	TRUE	FALSE	FALSE	FALSE	FALSE	FALSE	FALSE	FALSE	FALSE	FALSE
WBFM	FL	rs35589149	FALSE	TRUE	FALSE	FALSE	FALSE	FALSE	FALSE	FALSE	FALSE	FALSE	FALSE
WBFM	FL	rs35697691	FALSE	TRUE	FALSE	FALSE	FALSE	FALSE	FALSE	FALSE	FALSE	FALSE	FALSE
WBFM	FL	rs3754963	FALSE	TRUE	FALSE	FALSE	FALSE	FALSE	FALSE	FALSE	FALSE	FALSE	FALSE
WBFM	FL	rs3817428	FALSE	TRUE	FALSE	FALSE	FALSE	FALSE	FALSE	FALSE	FALSE	FALSE	FALSE
WBFM	FL	rs4820323	FALSE	TRUE	FALSE	FALSE	FALSE	FALSE	FALSE	FALSE	FALSE	FALSE	FALSE
WBFM	FL	rs61779305	FALSE	TRUE	FALSE	FALSE	FALSE	FALSE	FALSE	FALSE	FALSE	FALSE	FALSE
WBFM	FL	rs6561937	FALSE	TRUE	FALSE	FALSE	FALSE	FALSE	FALSE	FALSE	FALSE	FALSE	FALSE
WBFM	FL	rs6606686	FALSE	TRUE	FALSE	FALSE	FALSE	FALSE	FALSE	FALSE	FALSE	FALSE	FALSE
WBFM	FL	rs6769617	FALSE	TRUE	FALSE	FALSE	FALSE	FALSE	FALSE	FALSE	FALSE	FALSE	FALSE
WBFM	FL	rs73213484	FALSE	TRUE	FALSE	FALSE	FALSE	FALSE	FALSE	FALSE	FALSE	FALSE	FALSE
WBFM	FL	rs7442885	FALSE	TRUE	FALSE	FALSE	FALSE	FALSE	FALSE	FALSE	FALSE	FALSE	FALSE
WBFM	FL	rs754635	FALSE	TRUE	FALSE	FALSE	FALSE	FALSE	FALSE	FALSE	FALSE	FALSE	FALSE
WBFM	FL	rs75524125	FALSE	TRUE	FALSE	FALSE	FALSE	FALSE	FALSE	FALSE	FALSE	FALSE	FALSE
WBFM	FL	rs7619139	FALSE	TRUE	FALSE	FALSE	FALSE	FALSE	FALSE	FALSE	FALSE	FALSE	FALSE
WBFM	FL	rs76702514	FALSE	TRUE	FALSE	FALSE	FALSE	FALSE	FALSE	FALSE	FALSE	FALSE	FALSE
WBFM	FL	rs79197301	FALSE	TRUE	FALSE	FALSE	FALSE	FALSE	FALSE	FALSE	FALSE	FALSE	FALSE
WBFM	FL	rs80197460	FALSE	TRUE	FALSE	FALSE	FALSE	FALSE	FALSE	FALSE	FALSE	FALSE	FALSE
WBFM	FL	rs8074454	FALSE	TRUE	FALSE	FALSE	FALSE	FALSE	FALSE	FALSE	FALSE	FALSE	FALSE
WBFM	FL	rs825680	FALSE	TRUE	FALSE	FALSE	FALSE	FALSE	FALSE	FALSE	FALSE	FALSE	FALSE
WBFM	FL	rs900448	FALSE	TRUE	FALSE	FALSE	FALSE	FALSE	FALSE	FALSE	FALSE	FALSE	FALSE
WBFM	FL	rs9615937	FALSE	TRUE	FALSE	FALSE	FALSE	FALSE	FALSE	FALSE	FALSE	FALSE	FALSE
WBFM	FL	rs9788550	FALSE	TRUE	FALSE	FALSE	FALSE	FALSE	FALSE	FALSE	FALSE	FALSE	FALSE
WBFM	FL	rs10423928	FALSE	TRUE	FALSE	FALSE	FALSE	FALSE	FALSE	FALSE	FALSE	FALSE	FALSE
WBFM	FL	rs10499014	FALSE	TRUE	FALSE	FALSE	FALSE	FALSE	FALSE	FALSE	FALSE	FALSE	FALSE
WBFM	FL	rs11075256	FALSE	TRUE	FALSE	FALSE	FALSE	FALSE	FALSE	FALSE	FALSE	FALSE	FALSE
WBFM	FL	rs11129446	FALSE	TRUE	FALSE	FALSE	FALSE	FALSE	FALSE	FALSE	FALSE	FALSE	FALSE
WBFM	FL	rs11152135	FALSE	TRUE	FALSE	FALSE	FALSE	FALSE	FALSE	FALSE	FALSE	FALSE	FALSE
WBFM	FL	rs11664848	FALSE	TRUE	FALSE	FALSE	FALSE	FALSE	FALSE	FALSE	FALSE	FALSE	FALSE
WBFM	FL	rs117176448	FALSE	TRUE	FALSE	FALSE	FALSE	FALSE	FALSE	FALSE	FALSE	FALSE	FALSE
WBFM	FL	rs11926024	FALSE	TRUE	FALSE	FALSE	FALSE	FALSE	FALSE	FALSE	FALSE	FALSE	FALSE
WBFM	FL	rs13218383	FALSE	TRUE	FALSE	FALSE	FALSE	FALSE	FALSE	FALSE	FALSE	FALSE	FALSE
WBFM	FL	rs1383723	FALSE	TRUE	FALSE	FALSE	FALSE	FALSE	FALSE	FALSE	FALSE	FALSE	FALSE
WBFM	FL	rs148636479	FALSE	TRUE	FALSE	FALSE	FALSE	FALSE	FALSE	FALSE	FALSE	FALSE	FALSE
WBFM	FL	rs1568488	FALSE	TRUE	FALSE	FALSE	FALSE	FALSE	FALSE	FALSE	FALSE	FALSE	FALSE
WBFM	FL	rs17668356	FALSE	TRUE	FALSE	FALSE	FALSE	FALSE	FALSE	FALSE	FALSE	FALSE	FALSE
WBFM	FL	rs17681686	FALSE	TRUE	FALSE	FALSE	FALSE	FALSE	FALSE	FALSE	FALSE	FALSE	FALSE
WBFM	FL	rs17744603	FALSE	TRUE	FALSE	FALSE	FALSE	FALSE	FALSE	FALSE	FALSE	FALSE	FALSE
WBFM	FL	rs1782508	FALSE	TRUE	FALSE	FALSE	FALSE	FALSE	FALSE	FALSE	FALSE	FALSE	FALSE
WBFM	FL	rs1801282	FALSE	TRUE	FALSE	FALSE	FALSE	FALSE	FALSE	FALSE	FALSE	FALSE	FALSE
WBFM	FL	rs2249825	FALSE	TRUE	FALSE	FALSE	FALSE	FALSE	FALSE	FALSE	FALSE	FALSE	FALSE
WBFM	FL	rs35099456	FALSE	TRUE	FALSE	FALSE	FALSE	FALSE	FALSE	FALSE	FALSE	FALSE	FALSE
WBFM	FL	rs35589149	FALSE	TRUE	FALSE	FALSE	FALSE	FALSE	FALSE	FALSE	FALSE	FALSE	FALSE
WBFM	FL	rs35697691	FALSE	TRUE	FALSE	FALSE	FALSE	FALSE	FALSE	FALSE	FALSE	FALSE	FALSE
WBFM	FL	rs3754963	FALSE	TRUE	FALSE	FALSE	FALSE	FALSE	FALSE	FALSE	FALSE	FALSE	FALSE
WBFM	FL	rs3817428	FALSE	TRUE	FALSE	FALSE	FALSE	FALSE	FALSE	FALSE	FALSE	FALSE	FALSE
WBFM	FL	rs4820323	FALSE	TRUE	FALSE	FALSE	FALSE	FALSE	FALSE	FALSE	FALSE	FALSE	FALSE
WBFM	FL	rs61779305	FALSE	TRUE	FALSE	FALSE	FALSE	FALSE	FALSE	FALSE	FALSE	FALSE	FALSE
WBFM	FL	rs6561937	FALSE	TRUE	FALSE	FALSE	FALSE	FALSE	FALSE	FALSE	FALSE	FALSE	FALSE
WBFM	FL	rs6606686	FALSE	TRUE	FALSE	FALSE	FALSE	FALSE	FALSE	FALSE	FALSE	FALSE	FALSE
WBFM	FL	rs6769617	FALSE	TRUE	FALSE	FALSE	FALSE	FALSE	FALSE	FALSE	FALSE	FALSE	FALSE
WBFM	FL	rs73213484	FALSE	TRUE	FALSE	FALSE	FALSE	FALSE	FALSE	FALSE	FALSE	FALSE	FALSE
WBFM	FL	rs7442885	FALSE	TRUE	FALSE	FALSE	FALSE	FALSE	FALSE	FALSE	FALSE	FALSE	FALSE
WBFM	FL	rs754635	FALSE	TRUE	FALSE	FALSE	FALSE	FALSE	FALSE	FALSE	FALSE	FALSE	FALSE
WBFM	FL	rs75524125	FALSE	TRUE	FALSE	FALSE	FALSE	FALSE	FALSE	FALSE	FALSE	FALSE	FALSE
WBFM	FL	rs7619139	FALSE	TRUE	FALSE	FALSE	FALSE	FALSE	FALSE	FALSE	FALSE	FALSE	FALSE
WBFM	FL	rs76702514	FALSE	TRUE	FALSE	FALSE	FALSE	FALSE	FALSE	FALSE	FALSE	FALSE	FALSE
WBFM	FL	rs79197301	FALSE	TRUE	FALSE	FALSE	FALSE	FALSE	FALSE	FALSE	FALSE	FALSE	FALSE
WBFM	FL	rs80197460	FALSE	TRUE	FALSE	FALSE	FALSE	FALSE	FALSE	FALSE	FALSE	FALSE	FALSE
WBFM	FL	rs8074454	FALSE	TRUE	FALSE	FALSE	FALSE	FALSE	FALSE	FALSE	FALSE	FALSE	FALSE
WBFM	FL	rs825680	FALSE	TRUE	FALSE	FALSE	FALSE	FALSE	FALSE	FALSE	FALSE	FALSE	FALSE
WBFM	FL	rs900448	FALSE	TRUE	FALSE	FALSE	FALSE	FALSE	FALSE	FALSE	FALSE	FALSE	FALSE
WBFM	FL	rs9304665	FALSE	TRUE	FALSE	FALSE	FALSE	FALSE	FALSE	FALSE	FALSE	FALSE	FALSE
WBFM	FL	rs9615937	FALSE	TRUE	FALSE	FALSE	FALSE	FALSE	FALSE	FALSE	FALSE	FALSE	FALSE
WBFM	FL	rs9788550	FALSE	TRUE	FALSE	FALSE	FALSE	FALSE	FALSE	FALSE	FALSE	FALSE	FALSE
WBFM	FL	rs10187101	FALSE	FALSE	FALSE	FALSE	TRUE	FALSE	FALSE	FALSE	FALSE	FALSE	FALSE
WBFM	FL	rs1056441	FALSE	FALSE	FALSE	FALSE	TRUE	FALSE	FALSE	FALSE	FALSE	FALSE	FALSE
WBFM	FL	rs10927006	FALSE	FALSE	FALSE	FALSE	TRUE	FALSE	FALSE	FALSE	FALSE	FALSE	FALSE
WBFM	FL	rs11012732	FALSE	FALSE	FALSE	FALSE	TRUE	FALSE	FALSE	FALSE	FALSE	FALSE	FALSE
WBFM	FL	rs12937411	FALSE	FALSE	FALSE	FALSE	TRUE	FALSE	FALSE	FALSE	FALSE	FALSE	FALSE
WBFM	FL	rs215634	FALSE	FALSE	FALSE	FALSE	TRUE	FALSE	FALSE	FALSE	FALSE	FALSE	FALSE
WBFM	FL	rs2568958	FALSE	FALSE	FALSE	FALSE	TRUE	FALSE	FALSE	FALSE	FALSE	FALSE	FALSE
WBFM	FL	rs2814993	FALSE	FALSE	FALSE	FALSE	TRUE	FALSE	FALSE	FALSE	FALSE	FALSE	FALSE
WBFM	FL	rs34517439	FALSE	FALSE	FALSE	FALSE	TRUE	FALSE	FALSE	FALSE	FALSE	FALSE	FALSE
WBFM	FL	rs3845344	FALSE	FALSE	FALSE	FALSE	TRUE	FALSE	FALSE	FALSE	FALSE	FALSE	FALSE
WBFM	FL	rs543874	FALSE	FALSE	FALSE	FALSE	TRUE	FALSE	FALSE	FALSE	FALSE	FALSE	FALSE
WBFM	FL	rs62396185	FALSE	FALSE	FALSE	FALSE	TRUE	FALSE	FALSE	FALSE	FALSE	FALSE	FALSE
WBFM	FL	rs6567160	FALSE	FALSE	FALSE	FALSE	TRUE	FALSE	FALSE	FALSE	FALSE	FALSE	FALSE
WBFM	FL	rs6744646	FALSE	FALSE	FALSE	FALSE	TRUE	FALSE	FALSE	FALSE	FALSE	FALSE	FALSE
WBFM	FL	rs7132908	FALSE	FALSE	FALSE	FALSE	TRUE	FALSE	FALSE	FALSE	FALSE	FALSE	FALSE
WBFM	FL	rs743572	FALSE	FALSE	FALSE	FALSE	TRUE	FALSE	FALSE	FALSE	FALSE	FALSE	FALSE
WBFM	FL	rs7575523	FALSE	FALSE	FALSE	FALSE	TRUE	FALSE	FALSE	FALSE	FALSE	FALSE	FALSE
WBFM	FL	rs7632381	FALSE	FALSE	FALSE	FALSE	TRUE	FALSE	FALSE	FALSE	FALSE	FALSE	FALSE
WBFM	FL	rs862320	FALSE	FALSE	FALSE	FALSE	TRUE	FALSE	FALSE	FALSE	FALSE	FALSE	FALSE
WBFM	FL	rs9304665	FALSE	FALSE	FALSE	FALSE	TRUE	FALSE	FALSE	FALSE	FALSE	FALSE	FALSE
WBFM	FL	rs9320823	FALSE	FALSE	FALSE	FALSE	TRUE	FALSE	FALSE	FALSE	FALSE	FALSE	FALSE
WBFM	FL	rs9515455	FALSE	FALSE	FALSE	FALSE	TRUE	FALSE	FALSE	FALSE	FALSE	FALSE	FALSE
WBFM	FL	rs9876664	FALSE	FALSE	FALSE	FALSE	TRUE	FALSE	FALSE	FALSE	FALSE	FALSE	FALSE
WBFM	FL	rs9955276	FALSE	FALSE	FALSE	FALSE	TRUE	FALSE	FALSE	FALSE	FALSE	FALSE	FALSE
WBFM	FL	rs253440	FALSE	FALSE	FALSE	FALSE	FALSE	FALSE	TRUE	FALSE	FALSE	FALSE	FALSE
WBFFM	FL	rs77760034	FALSE	FALSE	TRUE	FALSE	FALSE	FALSE	FALSE	FALSE	FALSE	FALSE	FALSE
WBFFM	FL	rs10170971	FALSE	TRUE	FALSE	FALSE	FALSE	FALSE	FALSE	FALSE	FALSE	FALSE	FALSE
WBFFM	FL	rs10883560	FALSE	TRUE	FALSE	FALSE	FALSE	FALSE	FALSE	FALSE	FALSE	FALSE	FALSE
WBFFM	FL	rs13264909	FALSE	TRUE	FALSE	FALSE	FALSE	FALSE	FALSE	FALSE	FALSE	FALSE	FALSE
WBFFM	FL	rs1478575	FALSE	TRUE	FALSE	FALSE	FALSE	FALSE	FALSE	FALSE	FALSE	FALSE	FALSE
WBFFM	FL	rs165656	FALSE	TRUE	FALSE	FALSE	FALSE	FALSE	FALSE	FALSE	FALSE	FALSE	FALSE
WBFFM	FL	rs2092322	FALSE	TRUE	FALSE	FALSE	FALSE	FALSE	FALSE	FALSE	FALSE	FALSE	FALSE
WBFFM	FL	rs2365363	FALSE	TRUE	FALSE	FALSE	FALSE	FALSE	FALSE	FALSE	FALSE	FALSE	FALSE
WBFFM	FL	rs2422054	FALSE	TRUE	FALSE	FALSE	FALSE	FALSE	FALSE	FALSE	FALSE	FALSE	FALSE
WBFFM	FL	rs2881198	FALSE	TRUE	FALSE	FALSE	FALSE	FALSE	FALSE	FALSE	FALSE	FALSE	FALSE
WBFFM	FL	rs2968669	FALSE	TRUE	FALSE	FALSE	FALSE	FALSE	FALSE	FALSE	FALSE	FALSE	FALSE
WBFFM	FL	rs3771382	FALSE	TRUE	FALSE	FALSE	FALSE	FALSE	FALSE	FALSE	FALSE	FALSE	FALSE
WBFFM	FL	rs37964	FALSE	TRUE	FALSE	FALSE	FALSE	FALSE	FALSE	FALSE	FALSE	FALSE	FALSE
WBFFM	FL	rs4360494	FALSE	TRUE	FALSE	FALSE	FALSE	FALSE	FALSE	FALSE	FALSE	FALSE	FALSE
WBFFM	FL	rs4677153	FALSE	TRUE	FALSE	FALSE	FALSE	FALSE	FALSE	FALSE	FALSE	FALSE	FALSE
WBFFM	FL	rs4887925	FALSE	TRUE	FALSE	FALSE	FALSE	FALSE	FALSE	FALSE	FALSE	FALSE	FALSE
WBFFM	FL	rs58857770	FALSE	TRUE	FALSE	FALSE	FALSE	FALSE	FALSE	FALSE	FALSE	FALSE	FALSE
WBFFM	FL	rs933807	FALSE	TRUE	FALSE	FALSE	FALSE	FALSE	FALSE	FALSE	FALSE	FALSE	FALSE
WBFFM	FL	rs9394166	FALSE	TRUE	FALSE	FALSE	FALSE	FALSE	FALSE	FALSE	FALSE	FALSE	FALSE
WBFFM	FL	rs9882731	FALSE	TRUE	FALSE	FALSE	FALSE	FALSE	FALSE	FALSE	FALSE	FALSE	FALSE
WBFFM	FL	rs9976812	FALSE	TRUE	FALSE	FALSE	FALSE	FALSE	FALSE	FALSE	FALSE	FALSE	FALSE
WBFFM	FL	rs10269774	FALSE	FALSE	FALSE	FALSE	TRUE	FALSE	FALSE	FALSE	FALSE	FALSE	FALSE
WBFFM	FL	rs10938397	FALSE	FALSE	FALSE	FALSE	TRUE	FALSE	FALSE	FALSE	FALSE	FALSE	FALSE
WBFFM	FL	rs11611651	FALSE	FALSE	FALSE	FALSE	TRUE	FALSE	FALSE	FALSE	FALSE	FALSE	FALSE
WBFFM	FL	rs12967135	FALSE	FALSE	FALSE	FALSE	TRUE	FALSE	FALSE	FALSE	FALSE	FALSE	FALSE
WBFFM	FL	rs13125082	FALSE	FALSE	FALSE	FALSE	TRUE	FALSE	FALSE	FALSE	FALSE	FALSE	FALSE
WBFFM	FL	rs2265309	FALSE	FALSE	FALSE	FALSE	TRUE	FALSE	FALSE	FALSE	FALSE	FALSE	FALSE
WBFFM	FL	rs2568958	FALSE	FALSE	FALSE	FALSE	TRUE	FALSE	FALSE	FALSE	FALSE	FALSE	FALSE
WBFFM	FL	rs34517439	FALSE	FALSE	FALSE	FALSE	TRUE	FALSE	FALSE	FALSE	FALSE	FALSE	FALSE
WBFFM	FL	rs3810291	FALSE	FALSE	FALSE	FALSE	TRUE	FALSE	FALSE	FALSE	FALSE	FALSE	FALSE
WBFFM	FL	rs3845344	FALSE	FALSE	FALSE	FALSE	TRUE	FALSE	FALSE	FALSE	FALSE	FALSE	FALSE
WBFFM	FL	rs4369779	FALSE	FALSE	FALSE	FALSE	TRUE	FALSE	FALSE	FALSE	FALSE	FALSE	FALSE
WBFFM	FL	rs527248	FALSE	FALSE	FALSE	FALSE	TRUE	FALSE	FALSE	FALSE	FALSE	FALSE	FALSE
WBFFM	FL	rs6743060	FALSE	FALSE	FALSE	FALSE	TRUE	FALSE	FALSE	FALSE	FALSE	FALSE	FALSE
WBFFM	FL	rs6779752	FALSE	FALSE	FALSE	FALSE	TRUE	FALSE	FALSE	FALSE	FALSE	FALSE	FALSE
WBFFM	FL	rs7132908	FALSE	FALSE	FALSE	FALSE	TRUE	FALSE	FALSE	FALSE	FALSE	FALSE	FALSE
WBFFM	FL	rs2071286	FALSE	FALSE	FALSE	FALSE	FALSE	FALSE	FALSE	TRUE	FALSE	FALSE	FALSE
SH	FL	rs11051456	FALSE	FALSE	TRUE	FALSE	FALSE	FALSE	FALSE	FALSE	FALSE	FALSE	FALSE
SH	FL	rs10046853	FALSE	FALSE	FALSE	FALSE	FALSE	FALSE	FALSE	FALSE	FALSE	FALSE	FALSE
SH	FL	rs10228350	FALSE	TRUE	FALSE	FALSE	FALSE	FALSE	FALSE	FALSE	FALSE	FALSE	FALSE
SH	FL	rs10811092	FALSE	TRUE	FALSE	FALSE	FALSE	FALSE	FALSE	FALSE	FALSE	FALSE	FALSE
SH	FL	rs11664336	FALSE	TRUE	FALSE	FALSE	FALSE	FALSE	FALSE	FALSE	FALSE	FALSE	FALSE
SH	FL	rs11678288	FALSE	TRUE	FALSE	FALSE	FALSE	FALSE	FALSE	FALSE	FALSE	FALSE	FALSE
SH	FL	rs12572775	FALSE	TRUE	FALSE	FALSE	FALSE	FALSE	FALSE	FALSE	FALSE	FALSE	FALSE
SH	FL	rs13102005	FALSE	TRUE	FALSE	FALSE	FALSE	FALSE	FALSE	FALSE	FALSE	FALSE	FALSE
SH	FL	rs1467847	FALSE	TRUE	FALSE	FALSE	FALSE	FALSE	FALSE	FALSE	FALSE	FALSE	FALSE
SH	FL	rs153661	FALSE	TRUE	FALSE	FALSE	FALSE	FALSE	FALSE	FALSE	FALSE	FALSE	FALSE
SH	FL	rs16905189	FALSE	TRUE	FALSE	FALSE	FALSE	FALSE	FALSE	FALSE	FALSE	FALSE	FALSE
SH	FL	rs172179	FALSE	TRUE	FALSE	FALSE	FALSE	FALSE	FALSE	FALSE	FALSE	FALSE	FALSE
SH	FL	rs1875969	FALSE	TRUE	FALSE	FALSE	FALSE	FALSE	FALSE	FALSE	FALSE	FALSE	FALSE
SH	FL	rs2061708	FALSE	TRUE	FALSE	FALSE	FALSE	FALSE	FALSE	FALSE	FALSE	FALSE	FALSE
SH	FL	rs2384145	FALSE	TRUE	FALSE	FALSE	FALSE	FALSE	FALSE	FALSE	FALSE	FALSE	FALSE
SH	FL	rs3771382	FALSE	TRUE	FALSE	FALSE	FALSE	FALSE	FALSE	FALSE	FALSE	FALSE	FALSE
SH	FL	rs3790086	FALSE	TRUE	FALSE	FALSE	FALSE	FALSE	FALSE	FALSE	FALSE	FALSE	FALSE
SH	FL	rs3812163	FALSE	TRUE	FALSE	FALSE	FALSE	FALSE	FALSE	FALSE	FALSE	FALSE	FALSE
SH	FL	rs418280	FALSE	TRUE	FALSE	FALSE	FALSE	FALSE	FALSE	FALSE	FALSE	FALSE	FALSE
SH	FL	rs4302014	FALSE	TRUE	FALSE	FALSE	FALSE	FALSE	FALSE	FALSE	FALSE	FALSE	FALSE
SH	FL	rs5759006	FALSE	TRUE	FALSE	FALSE	FALSE	FALSE	FALSE	FALSE	FALSE	FALSE	FALSE
SH	FL	rs6464921	FALSE	TRUE	FALSE	FALSE	FALSE	FALSE	FALSE	FALSE	FALSE	FALSE	FALSE
SH	FL	rs7652177	FALSE	TRUE	FALSE	FALSE	FALSE	FALSE	FALSE	FALSE	FALSE	FALSE	FALSE
SH	FL	rs7847059	FALSE	TRUE	FALSE	FALSE	FALSE	FALSE	FALSE	FALSE	FALSE	FALSE	FALSE
SH	FL	rs832806	FALSE	TRUE	FALSE	FALSE	FALSE	FALSE	FALSE	FALSE	FALSE	FALSE	FALSE
SH	FL	rs9352895	FALSE	TRUE	FALSE	FALSE	FALSE	FALSE	FALSE	FALSE	FALSE	FALSE	FALSE
SH	FL	rs9976812	FALSE	TRUE	FALSE	FALSE	FALSE	FALSE	FALSE	FALSE	FALSE	FALSE	FALSE
WBFFM	FL	rs77760034	FALSE	FALSE	TRUE	FALSE	FALSE	FALSE	FALSE	FALSE	FALSE	FALSE	FALSE
WBFFM	FL	rs10170971	FALSE	TRUE	FALSE	FALSE	FALSE	FALSE	FALSE	FALSE	FALSE	FALSE	FALSE
WBFFM	FL	rs10883560	FALSE	TRUE	FALSE	FALSE	FALSE	FALSE	FALSE	FALSE	FALSE	FALSE	FALSE
WBFFM	FL	rs13264909	FALSE	TRUE	FALSE	FALSE	FALSE	FALSE	FALSE	FALSE	FALSE	FALSE	FALSE
WBFFM	FL	rs1478575	FALSE	TRUE	FALSE	FALSE	FALSE	FALSE	FALSE	FALSE	FALSE	FALSE	FALSE
WBFFM	FL	rs165656	FALSE	TRUE	FALSE	FALSE	FALSE	FALSE	FALSE	FALSE	FALSE	FALSE	FALSE
WBFFM	FL	rs2092322	FALSE	TRUE	FALSE	FALSE	FALSE	FALSE	FALSE	FALSE	FALSE	FALSE	FALSE
WBFFM	FL	rs2365363	FALSE	TRUE	FALSE	FALSE	FALSE	FALSE	FALSE	FALSE	FALSE	FALSE	FALSE
WBFFM	FL	rs2422054	FALSE	TRUE	FALSE	FALSE	FALSE	FALSE	FALSE	FALSE	FALSE	FALSE	FALSE
WBFFM	FL	rs2881198	FALSE	TRUE	FALSE	FALSE	FALSE	FALSE	FALSE	FALSE	FALSE	FALSE	FALSE
WBFFM	FL	rs2968669	FALSE	TRUE	FALSE	FALSE	FALSE	FALSE	FALSE	FALSE	FALSE	FALSE	FALSE
WBFFM	FL	rs3771382	FALSE	TRUE	FALSE	FALSE	FALSE	FALSE	FALSE	FALSE	FALSE	FALSE	FALSE
WBFFM	FL	rs37964	FALSE	TRUE	FALSE	FALSE	FALSE	FALSE	FALSE	FALSE	FALSE	FALSE	FALSE
WBFFM	FL	rs4360494	FALSE	TRUE	FALSE	FALSE	FALSE	FALSE	FALSE	FALSE	FALSE	FALSE	FALSE
WBFFM	FL	rs4677153	FALSE	TRUE	FALSE	FALSE	FALSE	FALSE	FALSE	FALSE	FALSE	FALSE	FALSE
WBFFM	FL	rs4887925	FALSE	TRUE	FALSE	FALSE	FALSE	FALSE	FALSE	FALSE	FALSE	FALSE	FALSE
WBFFM	FL	rs58857770	FALSE	TRUE	FALSE	FALSE	FALSE	FALSE	FALSE	FALSE	FALSE	FALSE	FALSE
WBFFM	FL	rs933807	FALSE	TRUE	FALSE	FALSE	FALSE	FALSE	FALSE	FALSE	FALSE	FALSE	FALSE
WBFFM	FL	rs9394166	FALSE	TRUE	FALSE	FALSE	FALSE	FALSE	FALSE	FALSE	FALSE	FALSE	FALSE
WBFFM	FL	rs9882731	FALSE	TRUE	FALSE	FALSE	FALSE	FALSE	FALSE	FALSE	FALSE	FALSE	FALSE
WBFFM	FL	rs9976812	FALSE	TRUE	FALSE	FALSE	FALSE	FALSE	FALSE	FALSE	FALSE	FALSE	FALSE
WBFFM	FL	rs10228350	FALSE	TRUE	FALSE	FALSE	FALSE	FALSE	FALSE	FALSE	FALSE	FALSE	FALSE
WBFFM	FL	rs10811092	FALSE	TRUE	FALSE	FALSE	FALSE	FALSE	FALSE	FALSE	FALSE	FALSE	FALSE
WBFFM	FL	rs11664336	FALSE	TRUE	FALSE	FALSE	FALSE	FALSE	FALSE	FALSE	FALSE	FALSE	FALSE
WBFFM	FL	rs11678288	FALSE	TRUE	FALSE	FALSE	FALSE	FALSE	FALSE	FALSE	FALSE	FALSE	FALSE
WBFFM	FL	rs12572775	FALSE	TRUE	FALSE	FALSE	FALSE	FALSE	FALSE	FALSE	FALSE	FALSE	FALSE
WBFFM	FL	rs13102005	FALSE	TRUE	FALSE	FALSE	FALSE	FALSE	FALSE	FALSE	FALSE	FALSE	FALSE
WBFFM	FL	rs1467847	FALSE	TRUE	FALSE	FALSE	FALSE	FALSE	FALSE	FALSE	FALSE	FALSE	FALSE
WBFFM	FL	rs153661	FALSE	TRUE	FALSE	FALSE	FALSE	FALSE	FALSE	FALSE	FALSE	FALSE	FALSE
WBFFM	FL	rs16905189	FALSE	TRUE	FALSE	FALSE	FALSE	FALSE	FALSE	FALSE	FALSE	FALSE	FALSE
WBFFM	FL	rs172179	FALSE	TRUE	FALSE	FALSE	FALSE	FALSE	FALSE	FALSE	FALSE	FALSE	FALSE
WBFFM	FL	rs1875969	FALSE	TRUE	FALSE	FALSE	FALSE	FALSE	FALSE	FALSE	FALSE	FALSE	FALSE
WBFFM	FL	rs2061708	FALSE	TRUE	FALSE	FALSE	FALSE	FALSE	FALSE	FALSE	FALSE	FALSE	FALSE
WBFFM	FL	rs2384145	FALSE	TRUE	FALSE	FALSE	FALSE	FALSE	FALSE	FALSE	FALSE	FALSE	FALSE
WBFFM	FL	rs3771382	FALSE	TRUE	FALSE	FALSE	FALSE	FALSE	FALSE	FALSE	FALSE	FALSE	FALSE
WBFFM	FL	rs3790086	FALSE	TRUE	FALSE	FALSE	FALSE	FALSE	FALSE	FALSE	FALSE	FALSE	FALSE
WBFFM	FL	rs3812163	FALSE	TRUE	FALSE	FALSE	FALSE	FALSE	FALSE	FALSE	FALSE	FALSE	FALSE
WBFFM	FL	rs418280	FALSE	TRUE	FALSE	FALSE	FALSE	FALSE	FALSE	FALSE	FALSE	FALSE	FALSE
WBFFM	FL	rs4302014	FALSE	TRUE	FALSE	FALSE	FALSE	FALSE	FALSE	FALSE	FALSE	FALSE	FALSE
WBFFM	FL	rs5759006	FALSE	TRUE	FALSE	FALSE	FALSE	FALSE	FALSE	FALSE	FALSE	FALSE	FALSE
WBFFM	FL	rs6464921	FALSE	TRUE	FALSE	FALSE	FALSE	FALSE	FALSE	FALSE	FALSE	FALSE	FALSE
WBFFM	FL	rs7652177	FALSE	TRUE	FALSE	FALSE	FALSE	FALSE	FALSE	FALSE	FALSE	FALSE	FALSE
WBFFM	FL	rs7847059	FALSE	TRUE	FALSE	FALSE	FALSE	FALSE	FALSE	FALSE	FALSE	FALSE	FALSE
WBFFM	FL	rs832806	FALSE	TRUE	FALSE	FALSE	FALSE	FALSE	FALSE	FALSE	FALSE	FALSE	FALSE
WBFFM	FL	rs9352895	FALSE	TRUE	FALSE	FALSE	FALSE	FALSE	FALSE	FALSE	FALSE	FALSE	FALSE
WBFFM	FL	rs9976812	FALSE	TRUE	FALSE	FALSE	FALSE	FALSE	FALSE	FALSE	FALSE	FALSE	FALSE
WBFFM	FL	rs10046853	FALSE	TRUE	FALSE	FALSE	FALSE	FALSE	FALSE	FALSE	FALSE	FALSE	FALSE
WBFFM	FL	rs10188231	FALSE	TRUE	FALSE	FALSE	FALSE	FALSE	FALSE	FALSE	FALSE	FALSE	FALSE
WBFFM	FL	rs1049193	FALSE	TRUE	FALSE	FALSE	FALSE	FALSE	FALSE	FALSE	FALSE	FALSE	FALSE
WBFFM	FL	rs10498672	FALSE	TRUE	FALSE	FALSE	FALSE	FALSE	FALSE	FALSE	FALSE	FALSE	FALSE
WBFFM	FL	rs10939792	FALSE	TRUE	FALSE	FALSE	FALSE	FALSE	FALSE	FALSE	FALSE	FALSE	FALSE
WBFFM	FL	rs11052457	FALSE	TRUE	FALSE	FALSE	FALSE	FALSE	FALSE	FALSE	FALSE	FALSE	FALSE
WBFFM	FL	rs111640872	FALSE	TRUE	FALSE	FALSE	FALSE	FALSE	FALSE	FALSE	FALSE	FALSE	FALSE
WBFFM	FL	rs113619763	FALSE	TRUE	FALSE	FALSE	FALSE	FALSE	FALSE	FALSE	FALSE	FALSE	FALSE
WBFFM	FL	rs11782103	FALSE	TRUE	FALSE	FALSE	FALSE	FALSE	FALSE	FALSE	FALSE	FALSE	FALSE
WBFFM	FL	rs11997525	FALSE	TRUE	FALSE	FALSE	FALSE	FALSE	FALSE	FALSE	FALSE	FALSE	FALSE
WBFFM	FL	rs12146350	FALSE	TRUE	FALSE	FALSE	FALSE	FALSE	FALSE	FALSE	FALSE	FALSE	FALSE
WBFFM	FL	rs1268947	FALSE	TRUE	FALSE	FALSE	FALSE	FALSE	FALSE	FALSE	FALSE	FALSE	FALSE
WBFFM	FL	rs1573891	FALSE	TRUE	FALSE	FALSE	FALSE	FALSE	FALSE	FALSE	FALSE	FALSE	FALSE
WBFFM	FL	rs1846221	FALSE	TRUE	FALSE	FALSE	FALSE	FALSE	FALSE	FALSE	FALSE	FALSE	FALSE
WBFFM	FL	rs1924936	FALSE	TRUE	FALSE	FALSE	FALSE	FALSE	FALSE	FALSE	FALSE	FALSE	FALSE
WBFFM	FL	rs1928850	FALSE	TRUE	FALSE	FALSE	FALSE	FALSE	FALSE	FALSE	FALSE	FALSE	FALSE
WBFFM	FL	rs2270894	FALSE	TRUE	FALSE	FALSE	FALSE	FALSE	FALSE	FALSE	FALSE	FALSE	FALSE
WBFFM	FL	rs25849	FALSE	TRUE	FALSE	FALSE	FALSE	FALSE	FALSE	FALSE	FALSE	FALSE	FALSE
WBFFM	FL	rs2952615	FALSE	TRUE	FALSE	FALSE	FALSE	FALSE	FALSE	FALSE	FALSE	FALSE	FALSE
WBFFM	FL	rs3212260	FALSE	TRUE	FALSE	FALSE	FALSE	FALSE	FALSE	FALSE	FALSE	FALSE	FALSE
WBFFM	FL	rs34227797	FALSE	TRUE	FALSE	FALSE	FALSE	FALSE	FALSE	FALSE	FALSE	FALSE	FALSE
WBFFM	FL	rs41458449	FALSE	TRUE	FALSE	FALSE	FALSE	FALSE	FALSE	FALSE	FALSE	FALSE	FALSE
WBFFM	FL	rs4268495	FALSE	TRUE	FALSE	FALSE	FALSE	FALSE	FALSE	FALSE	FALSE	FALSE	FALSE
WBFFM	FL	rs4800670	FALSE	TRUE	FALSE	FALSE	FALSE	FALSE	FALSE	FALSE	FALSE	FALSE	FALSE
WBFFM	FL	rs485554	FALSE	TRUE	FALSE	FALSE	FALSE	FALSE	FALSE	FALSE	FALSE	FALSE	FALSE
WBFFM	FL	rs4865956	FALSE	TRUE	FALSE	FALSE	FALSE	FALSE	FALSE	FALSE	FALSE	FALSE	FALSE
WBFFM	FL	rs4899012	FALSE	TRUE	FALSE	FALSE	FALSE	FALSE	FALSE	FALSE	FALSE	FALSE	FALSE
WBFFM	FL	rs4968799	FALSE	TRUE	FALSE	FALSE	FALSE	FALSE	FALSE	FALSE	FALSE	FALSE	FALSE
WBFFM	FL	rs6026578	FALSE	TRUE	FALSE	FALSE	FALSE	FALSE	FALSE	FALSE	FALSE	FALSE	FALSE
WBFFM	FL	rs6235	FALSE	TRUE	FALSE	FALSE	FALSE	FALSE	FALSE	FALSE	FALSE	FALSE	FALSE
WBFFM	FL	rs62439025	FALSE	TRUE	FALSE	FALSE	FALSE	FALSE	FALSE	FALSE	FALSE	FALSE	FALSE
WBFFM	FL	rs62621400	FALSE	TRUE	FALSE	FALSE	FALSE	FALSE	FALSE	FALSE	FALSE	FALSE	FALSE
WBFFM	FL	rs663344	FALSE	TRUE	FALSE	FALSE	FALSE	FALSE	FALSE	FALSE	FALSE	FALSE	FALSE
WBFFM	FL	rs667515	FALSE	TRUE	FALSE	FALSE	FALSE	FALSE	FALSE	FALSE	FALSE	FALSE	FALSE
WBFFM	FL	rs72703409	FALSE	TRUE	FALSE	FALSE	FALSE	FALSE	FALSE	FALSE	FALSE	FALSE	FALSE
WBFFM	FL	rs73213484	FALSE	TRUE	FALSE	FALSE	FALSE	FALSE	FALSE	FALSE	FALSE	FALSE	FALSE
WBFFM	FL	rs7619139	FALSE	TRUE	FALSE	FALSE	FALSE	FALSE	FALSE	FALSE	FALSE	FALSE	FALSE
WBFFM	FL	rs76307059	FALSE	TRUE	FALSE	FALSE	FALSE	FALSE	FALSE	FALSE	FALSE	FALSE	FALSE
WBFFM	FL	rs77093479	FALSE	TRUE	FALSE	FALSE	FALSE	FALSE	FALSE	FALSE	FALSE	FALSE	FALSE
WBFFM	FL	rs7740107	FALSE	TRUE	FALSE	FALSE	FALSE	FALSE	FALSE	FALSE	FALSE	FALSE	FALSE
WBFFM	FL	rs7815955	FALSE	TRUE	FALSE	FALSE	FALSE	FALSE	FALSE	FALSE	FALSE	FALSE	FALSE
WBFFM	FL	rs7842996	FALSE	TRUE	FALSE	FALSE	FALSE	FALSE	FALSE	FALSE	FALSE	FALSE	FALSE
WBFFM	FL	rs843374	FALSE	TRUE	FALSE	FALSE	FALSE	FALSE	FALSE	FALSE	FALSE	FALSE	FALSE
WBFFM	FL	rs892511	FALSE	TRUE	FALSE	FALSE	FALSE	FALSE	FALSE	FALSE	FALSE	FALSE	FALSE
WBFFM	FL	rs9480933	FALSE	TRUE	FALSE	FALSE	FALSE	FALSE	FALSE	FALSE	FALSE	FALSE	FALSE
WBFFM	FL	rs9513510	FALSE	TRUE	FALSE	FALSE	FALSE	FALSE	FALSE	FALSE	FALSE	FALSE	FALSE
WBFFM	FL	rs968821	FALSE	TRUE	FALSE	FALSE	FALSE	FALSE	FALSE	FALSE	FALSE	FALSE	FALSE
WBFFM	FL	rs9783665	FALSE	TRUE	FALSE	FALSE	FALSE	FALSE	FALSE	FALSE	FALSE	FALSE	FALSE
WBFFM	FL	rs981002	FALSE	TRUE	FALSE	FALSE	FALSE	FALSE	FALSE	FALSE	FALSE	FALSE	FALSE
WBFFM	FL	rs9898189	FALSE	TRUE	FALSE	FALSE	FALSE	FALSE	FALSE	FALSE	FALSE	FALSE	FALSE
WC	FL	rs10423928	FALSE	TRUE	FALSE	FALSE	FALSE	FALSE	FALSE	FALSE	FALSE	FALSE	FALSE
WC	FL	rs10423928	FALSE	TRUE	FALSE	FALSE	FALSE	FALSE	FALSE	FALSE	FALSE	FALSE	FALSE
WC	FL	rs10423928	FALSE	TRUE	FALSE	FALSE	FALSE	FALSE	FALSE	FALSE	FALSE	FALSE	FALSE
WC	FL	rs10423928	FALSE	TRUE	FALSE	FALSE	FALSE	FALSE	FALSE	FALSE	FALSE	FALSE	FALSE
WC	FL	rs10423928	FALSE	TRUE	FALSE	FALSE	FALSE	FALSE	FALSE	FALSE	FALSE	FALSE	FALSE
WC	FL	rs10423928	FALSE	TRUE	FALSE	FALSE	FALSE	FALSE	FALSE	FALSE	FALSE	FALSE	FALSE
WC	FL	rs10423928	FALSE	TRUE	FALSE	FALSE	FALSE	FALSE	FALSE	FALSE	FALSE	FALSE	FALSE
WC	FL	rs10423928	FALSE	TRUE	FALSE	FALSE	FALSE	FALSE	FALSE	FALSE	FALSE	FALSE	FALSE
WC	FL	rs10423928	FALSE	TRUE	FALSE	FALSE	FALSE	FALSE	FALSE	FALSE	FALSE	FALSE	FALSE
WC	FL	rs10423928	FALSE	TRUE	FALSE	FALSE	FALSE	FALSE	FALSE	FALSE	FALSE	FALSE	FALSE
WC	FL	rs10423928	FALSE	TRUE	FALSE	FALSE	FALSE	FALSE	FALSE	FALSE	FALSE	FALSE	FALSE
WC	FL	rs10423928	FALSE	TRUE	FALSE	FALSE	FALSE	FALSE	FALSE	FALSE	FALSE	FALSE	FALSE
WC	FL	rs10423928	FALSE	TRUE	FALSE	FALSE	FALSE	FALSE	FALSE	FALSE	FALSE	FALSE	FALSE
WC	FL	rs10423928	FALSE	TRUE	FALSE	FALSE	FALSE	FALSE	FALSE	FALSE	FALSE	FALSE	FALSE
WC	FL	rs10423928	FALSE	TRUE	FALSE	FALSE	FALSE	FALSE	FALSE	FALSE	FALSE	FALSE	FALSE
WC	FL	rs10423928	FALSE	TRUE	FALSE	FALSE	FALSE	FALSE	FALSE	FALSE	FALSE	FALSE	FALSE
WC	FL	rs10423928	FALSE	TRUE	FALSE	FALSE	FALSE	FALSE	FALSE	FALSE	FALSE	FALSE	FALSE
WC	FL	rs10423928	FALSE	TRUE	FALSE	FALSE	FALSE	FALSE	FALSE	FALSE	FALSE	FALSE	FALSE
WC	FL	rs10423928	FALSE	TRUE	FALSE	FALSE	FALSE	FALSE	FALSE	FALSE	FALSE	FALSE	FALSE
WC	FL	rs10423928	FALSE	TRUE	FALSE	FALSE	FALSE	FALSE	FALSE	FALSE	FALSE	FALSE	FALSE
WC	FL	rs10423928	FALSE	TRUE	FALSE	FALSE	FALSE	FALSE	FALSE	FALSE	FALSE	FALSE	FALSE
WC	FL	rs10423928	FALSE	TRUE	FALSE	FALSE	FALSE	FALSE	FALSE	FALSE	FALSE	FALSE	FALSE
WC	FL	rs10423928	FALSE	TRUE	FALSE	FALSE	FALSE	FALSE	FALSE	FALSE	FALSE	FALSE	FALSE
WC	FL	rs10423928	FALSE	TRUE	FALSE	FALSE	FALSE	FALSE	FALSE	FALSE	FALSE	FALSE	FALSE
WC	FL	rs10423928	FALSE	TRUE	FALSE	FALSE	FALSE	FALSE	FALSE	FALSE	FALSE	FALSE	FALSE
WC	FL	rs10423928	FALSE	TRUE	FALSE	FALSE	FALSE	FALSE	FALSE	FALSE	FALSE	FALSE	FALSE
WC	FL	rs10423928	FALSE	TRUE	FALSE	FALSE	FALSE	FALSE	FALSE	FALSE	FALSE	FALSE	FALSE
WC	FL	rs10423928	FALSE	TRUE	FALSE	FALSE	FALSE	FALSE	FALSE	FALSE	FALSE	FALSE	FALSE
WC	FL	rs10423928	FALSE	TRUE	FALSE	FALSE	FALSE	FALSE	FALSE	FALSE	FALSE	FALSE	FALSE
WC	FL	rs10423928	FALSE	TRUE	FALSE	FALSE	FALSE	FALSE	FALSE	FALSE	FALSE	FALSE	FALSE
WC	FL	rs10423928	FALSE	TRUE	FALSE	FALSE	FALSE	FALSE	FALSE	FALSE	FALSE	FALSE	FALSE
WC	FL	rs10423928	FALSE	TRUE	FALSE	FALSE	FALSE	FALSE	FALSE	FALSE	FALSE	FALSE	FALSE
WC	FL	rs10423928	FALSE	FALSE	TRUE	FALSE	FALSE	FALSE	FALSE	FALSE	FALSE	FALSE	FALSE
WC	FL	rs10423928	FALSE	FALSE	TRUE	FALSE	FALSE	FALSE	FALSE	FALSE	FALSE	FALSE	FALSE
WC	FL	rs10423928	FALSE	TRUE	FALSE	FALSE	FALSE	FALSE	FALSE	FALSE	FALSE	FALSE	FALSE
WC	FL	rs10423928	FALSE	TRUE	FALSE	FALSE	FALSE	FALSE	FALSE	FALSE	FALSE	FALSE	FALSE
WC	FL	rs10423928	FALSE	TRUE	FALSE	FALSE	FALSE	FALSE	FALSE	FALSE	FALSE	FALSE	FALSE
WC	FL	rs10423928	FALSE	TRUE	FALSE	FALSE	FALSE	FALSE	FALSE	FALSE	FALSE	FALSE	FALSE
WC	FL	rs10423928	FALSE	TRUE	FALSE	FALSE	FALSE	FALSE	FALSE	FALSE	FALSE	FALSE	FALSE
WC	FL	rs10423928	FALSE	TRUE	FALSE	FALSE	FALSE	FALSE	FALSE	FALSE	FALSE	FALSE	FALSE
WC	FL	rs10423928	FALSE	TRUE	FALSE	FALSE	FALSE	FALSE	FALSE	FALSE	FALSE	FALSE	FALSE
WC	FL	rs10423928	FALSE	TRUE	FALSE	FALSE	FALSE	FALSE	FALSE	FALSE	FALSE	FALSE	FALSE
WC	FL	rs10423928	FALSE	TRUE	FALSE	FALSE	FALSE	FALSE	FALSE	FALSE	FALSE	FALSE	FALSE
WC	FL	rs10423928	FALSE	TRUE	FALSE	FALSE	FALSE	FALSE	FALSE	FALSE	FALSE	FALSE	FALSE
WC	FL	rs10423928	FALSE	TRUE	FALSE	FALSE	FALSE	FALSE	FALSE	FALSE	FALSE	FALSE	FALSE
WC	FL	rs10423928	FALSE	TRUE	FALSE	FALSE	FALSE	FALSE	FALSE	FALSE	FALSE	FALSE	FALSE
WC	FL	rs10423928	FALSE	TRUE	FALSE	FALSE	FALSE	FALSE	FALSE	FALSE	FALSE	FALSE	FALSE
WC	FL	rs10423928	FALSE	TRUE	FALSE	FALSE	FALSE	FALSE	FALSE	FALSE	FALSE	FALSE	FALSE
WC	FL	rs10423928	FALSE	TRUE	FALSE	FALSE	FALSE	FALSE	FALSE	FALSE	FALSE	FALSE	FALSE
WC	FL	rs10423928	FALSE	TRUE	FALSE	FALSE	FALSE	FALSE	FALSE	FALSE	FALSE	FALSE	FALSE
WC	FL	rs1183668	FALSE	FALSE	FALSE	FALSE	TRUE	FALSE	FALSE	FALSE	FALSE	FALSE	FALSE
WC	FL	rs12042959	FALSE	FALSE	FALSE	FALSE	TRUE	FALSE	FALSE	FALSE	FALSE	FALSE	FALSE
WC	FL	rs12463617	FALSE	FALSE	FALSE	FALSE	TRUE	FALSE	FALSE	FALSE	FALSE	FALSE	FALSE
WC	FL	rs13420048	FALSE	FALSE	FALSE	FALSE	TRUE	FALSE	FALSE	FALSE	FALSE	FALSE	FALSE
WC	FL	rs17296856	FALSE	FALSE	FALSE	FALSE	TRUE	FALSE	FALSE	FALSE	FALSE	FALSE	FALSE
WC	FL	rs1752169	FALSE	FALSE	FALSE	FALSE	TRUE	FALSE	FALSE	FALSE	FALSE	FALSE	FALSE
WC	FL	rs2568958	FALSE	FALSE	FALSE	FALSE	TRUE	FALSE	FALSE	FALSE	FALSE	FALSE	FALSE
WC	FL	rs34517439	FALSE	FALSE	FALSE	FALSE	TRUE	FALSE	FALSE	FALSE	FALSE	FALSE	FALSE
WC	FL	rs3845344	FALSE	FALSE	FALSE	FALSE	TRUE	FALSE	FALSE	FALSE	FALSE	FALSE	FALSE
WC	FL	rs4290163	FALSE	FALSE	FALSE	FALSE	TRUE	FALSE	FALSE	FALSE	FALSE	FALSE	FALSE
WC	FL	rs62261725	FALSE	FALSE	FALSE	FALSE	TRUE	FALSE	FALSE	FALSE	FALSE	FALSE	FALSE
WC	FL	rs6567160	FALSE	FALSE	FALSE	FALSE	TRUE	FALSE	FALSE	FALSE	FALSE	FALSE	FALSE
WC	FL	rs6682438	FALSE	FALSE	FALSE	FALSE	TRUE	FALSE	FALSE	FALSE	FALSE	FALSE	FALSE
WC	FL	rs6938973	FALSE	FALSE	FALSE	FALSE	TRUE	FALSE	FALSE	FALSE	FALSE	FALSE	FALSE
WC	FL	rs7132908	FALSE	FALSE	FALSE	FALSE	TRUE	FALSE	FALSE	FALSE	FALSE	FALSE	FALSE
WC	FL	rs883403	FALSE	FALSE	FALSE	FALSE	TRUE	FALSE	FALSE	FALSE	FALSE	FALSE	FALSE
WC	FL	rs9835772	FALSE	FALSE	FALSE	FALSE	TRUE	FALSE	FALSE	FALSE	FALSE	FALSE	FALSE
WC	FL	rs9926784	FALSE	FALSE	FALSE	FALSE	TRUE	FALSE	FALSE	FALSE	FALSE	FALSE	FALSE
WC	FL	rs10245306	FALSE	TRUE	FALSE	FALSE	FALSE	FALSE	FALSE	FALSE	FALSE	FALSE	FALSE
WC	FL	rs10423928	FALSE	TRUE	FALSE	FALSE	FALSE	FALSE	FALSE	FALSE	FALSE	FALSE	FALSE
WC	FL	rs10490869	FALSE	TRUE	FALSE	FALSE	FALSE	FALSE	FALSE	FALSE	FALSE	FALSE	FALSE
WC	FL	rs10499014	FALSE	TRUE	FALSE	FALSE	FALSE	FALSE	FALSE	FALSE	FALSE	FALSE	FALSE
WC	FL	rs10835676	FALSE	TRUE	FALSE	FALSE	FALSE	FALSE	FALSE	FALSE	FALSE	FALSE	FALSE
WC	FL	rs10842240	FALSE	TRUE	FALSE	FALSE	FALSE	FALSE	FALSE	FALSE	FALSE	FALSE	FALSE
WC	FL	rs10858334	FALSE	TRUE	FALSE	FALSE	FALSE	FALSE	FALSE	FALSE	FALSE	FALSE	FALSE
WC	FL	rs10957087	FALSE	TRUE	FALSE	FALSE	FALSE	FALSE	FALSE	FALSE	FALSE	FALSE	FALSE
WC	FL	rs10958933	FALSE	TRUE	FALSE	FALSE	FALSE	FALSE	FALSE	FALSE	FALSE	FALSE	FALSE
WC	FL	rs10962550	FALSE	TRUE	FALSE	FALSE	FALSE	FALSE	FALSE	FALSE	FALSE	FALSE	FALSE
WC	FL	rs1111817	FALSE	TRUE	FALSE	FALSE	FALSE	FALSE	FALSE	FALSE	FALSE	FALSE	FALSE
WC	FL	rs1117619	FALSE	TRUE	FALSE	FALSE	FALSE	FALSE	FALSE	FALSE	FALSE	FALSE	FALSE
WC	FL	rs116909769	FALSE	TRUE	FALSE	FALSE	FALSE	FALSE	FALSE	FALSE	FALSE	FALSE	FALSE
WC	FL	rs117767939	FALSE	TRUE	FALSE	FALSE	FALSE	FALSE	FALSE	FALSE	FALSE	FALSE	FALSE
WC	FL	rs1183668	FALSE	TRUE	FALSE	FALSE	FALSE	FALSE	FALSE	FALSE	FALSE	FALSE	FALSE
WC	FL	rs12287076	FALSE	TRUE	FALSE	FALSE	FALSE	FALSE	FALSE	FALSE	FALSE	FALSE	FALSE
WC	FL	rs12549000	FALSE	TRUE	FALSE	FALSE	FALSE	FALSE	FALSE	FALSE	FALSE	FALSE	FALSE
WC	FL	rs12964145	FALSE	TRUE	FALSE	FALSE	FALSE	FALSE	FALSE	FALSE	FALSE	FALSE	FALSE
WC	FL	rs143223871	FALSE	TRUE	FALSE	FALSE	FALSE	FALSE	FALSE	FALSE	FALSE	FALSE	FALSE
WC	FL	rs145350287	FALSE	TRUE	FALSE	FALSE	FALSE	FALSE	FALSE	FALSE	FALSE	FALSE	FALSE
WC	FL	rs1507331	FALSE	TRUE	FALSE	FALSE	FALSE	FALSE	FALSE	FALSE	FALSE	FALSE	FALSE
WC	FL	rs1570298	FALSE	TRUE	FALSE	FALSE	FALSE	FALSE	FALSE	FALSE	FALSE	FALSE	FALSE
WC	FL	rs1592732	FALSE	TRUE	FALSE	FALSE	FALSE	FALSE	FALSE	FALSE	FALSE	FALSE	FALSE
WC	FL	rs1603490	FALSE	TRUE	FALSE	FALSE	FALSE	FALSE	FALSE	FALSE	FALSE	FALSE	FALSE
WC	FL	rs1609303	FALSE	TRUE	FALSE	FALSE	FALSE	FALSE	FALSE	FALSE	FALSE	FALSE	FALSE
WC	FL	rs1801282	FALSE	TRUE	FALSE	FALSE	FALSE	FALSE	FALSE	FALSE	FALSE	FALSE	FALSE
WC	FL	rs2133561	FALSE	TRUE	FALSE	FALSE	FALSE	FALSE	FALSE	FALSE	FALSE	FALSE	FALSE
WC	FL	rs2537621	FALSE	TRUE	FALSE	FALSE	FALSE	FALSE	FALSE	FALSE	FALSE	FALSE	FALSE
WC	FL	rs2619770	FALSE	TRUE	FALSE	FALSE	FALSE	FALSE	FALSE	FALSE	FALSE	FALSE	FALSE
WC	FL	rs2903738	FALSE	TRUE	FALSE	FALSE	FALSE	FALSE	FALSE	FALSE	FALSE	FALSE	FALSE
WC	FL	rs2962466	FALSE	TRUE	FALSE	FALSE	FALSE	FALSE	FALSE	FALSE	FALSE	FALSE	FALSE
WC	FL	rs35856604	FALSE	TRUE	FALSE	FALSE	FALSE	FALSE	FALSE	FALSE	FALSE	FALSE	FALSE
WC	FL	rs4469245	FALSE	TRUE	FALSE	FALSE	FALSE	FALSE	FALSE	FALSE	FALSE	FALSE	FALSE
WC	FL	rs4517716	FALSE	TRUE	FALSE	FALSE	FALSE	FALSE	FALSE	FALSE	FALSE	FALSE	FALSE
WC	FL	rs4562625	FALSE	TRUE	FALSE	FALSE	FALSE	FALSE	FALSE	FALSE	FALSE	FALSE	FALSE
WC	FL	rs4742782	FALSE	TRUE	FALSE	FALSE	FALSE	FALSE	FALSE	FALSE	FALSE	FALSE	FALSE
WC	FL	rs4760820	FALSE	TRUE	FALSE	FALSE	FALSE	FALSE	FALSE	FALSE	FALSE	FALSE	FALSE
WC	FL	rs4800191	FALSE	TRUE	FALSE	FALSE	FALSE	FALSE	FALSE	FALSE	FALSE	FALSE	FALSE
WC	FL	rs4851283	FALSE	TRUE	FALSE	FALSE	FALSE	FALSE	FALSE	FALSE	FALSE	FALSE	FALSE
WC	FL	rs55722386	FALSE	TRUE	FALSE	FALSE	FALSE	FALSE	FALSE	FALSE	FALSE	FALSE	FALSE
WC	FL	rs649458	FALSE	TRUE	FALSE	FALSE	FALSE	FALSE	FALSE	FALSE	FALSE	FALSE	FALSE
WC	FL	rs6753395	FALSE	TRUE	FALSE	FALSE	FALSE	FALSE	FALSE	FALSE	FALSE	FALSE	FALSE
WC	FL	rs6846041	FALSE	TRUE	FALSE	FALSE	FALSE	FALSE	FALSE	FALSE	FALSE	FALSE	FALSE
WC	FL	rs716955	FALSE	TRUE	FALSE	FALSE	FALSE	FALSE	FALSE	FALSE	FALSE	FALSE	FALSE
WC	FL	rs7206608	FALSE	TRUE	FALSE	FALSE	FALSE	FALSE	FALSE	FALSE	FALSE	FALSE	FALSE
WC	FL	rs72618637	FALSE	TRUE	FALSE	FALSE	FALSE	FALSE	FALSE	FALSE	FALSE	FALSE	FALSE
WC	FL	rs7307203	FALSE	TRUE	FALSE	FALSE	FALSE	FALSE	FALSE	FALSE	FALSE	FALSE	FALSE
WC	FL	rs7442885	FALSE	TRUE	FALSE	FALSE	FALSE	FALSE	FALSE	FALSE	FALSE	FALSE	FALSE
WC	FL	rs746839	FALSE	TRUE	FALSE	FALSE	FALSE	FALSE	FALSE	FALSE	FALSE	FALSE	FALSE
WC	FL	rs76357735	FALSE	TRUE	FALSE	FALSE	FALSE	FALSE	FALSE	FALSE	FALSE	FALSE	FALSE
WC	FL	rs78719810	FALSE	TRUE	FALSE	FALSE	FALSE	FALSE	FALSE	FALSE	FALSE	FALSE	FALSE
WC	FL	rs8024137	FALSE	TRUE	FALSE	FALSE	FALSE	FALSE	FALSE	FALSE	FALSE	FALSE	FALSE
WC	FL	rs8097672	FALSE	TRUE	FALSE	FALSE	FALSE	FALSE	FALSE	FALSE	FALSE	FALSE	FALSE
WC	FL	rs8106047	FALSE	TRUE	FALSE	FALSE	FALSE	FALSE	FALSE	FALSE	FALSE	FALSE	FALSE
WC	FL	rs864789	FALSE	TRUE	FALSE	FALSE	FALSE	FALSE	FALSE	FALSE	FALSE	FALSE	FALSE
WC	FL	rs900448	FALSE	TRUE	FALSE	FALSE	FALSE	FALSE	FALSE	FALSE	FALSE	FALSE	FALSE
WC	FL	rs9289630	FALSE	TRUE	FALSE	FALSE	FALSE	FALSE	FALSE	FALSE	FALSE	FALSE	FALSE
WC	FL	rs9364685	FALSE	TRUE	FALSE	FALSE	FALSE	FALSE	FALSE	FALSE	FALSE	FALSE	FALSE
WC	FL	rs939375	FALSE	TRUE	FALSE	FALSE	FALSE	FALSE	FALSE	FALSE	FALSE	FALSE	FALSE
WC	FL	rs945211	FALSE	TRUE	FALSE	FALSE	FALSE	FALSE	FALSE	FALSE	FALSE	FALSE	FALSE
WC	FL	rs9916444	FALSE	TRUE	FALSE	FALSE	FALSE	FALSE	FALSE	FALSE	FALSE	FALSE	FALSE
HC	FL	rs10158176	FALSE	FALSE	FALSE	FALSE	FALSE	FALSE	FALSE	FALSE	FALSE	FALSE	FALSE
HC	FL	rs10499343	FALSE	FALSE	FALSE	FALSE	FALSE	FALSE	FALSE	FALSE	FALSE	FALSE	FALSE
HC	FL	rs10810598	FALSE	FALSE	FALSE	FALSE	FALSE	FALSE	FALSE	FALSE	FALSE	FALSE	FALSE
HC	FL	rs11150461	FALSE	FALSE	FALSE	FALSE	FALSE	FALSE	FALSE	FALSE	FALSE	FALSE	FALSE
HC	FL	rs116072427	FALSE	FALSE	FALSE	FALSE	FALSE	FALSE	FALSE	FALSE	FALSE	FALSE	FALSE
HC	FL	rs11664106	FALSE	FALSE	FALSE	FALSE	FALSE	FALSE	FALSE	FALSE	FALSE	FALSE	FALSE
HC	FL	rs117176448	FALSE	FALSE	FALSE	FALSE	FALSE	FALSE	FALSE	FALSE	FALSE	FALSE	FALSE
HC	FL	rs13034765	FALSE	FALSE	FALSE	FALSE	FALSE	FALSE	FALSE	FALSE	FALSE	FALSE	FALSE
HC	FL	rs148636479	FALSE	FALSE	FALSE	FALSE	FALSE	FALSE	FALSE	FALSE	FALSE	FALSE	FALSE
HC	FL	rs16868443	FALSE	FALSE	FALSE	FALSE	FALSE	FALSE	FALSE	FALSE	FALSE	FALSE	FALSE
HC	FL	rs17446299	FALSE	FALSE	FALSE	FALSE	FALSE	FALSE	FALSE	FALSE	FALSE	FALSE	FALSE
HC	FL	rs1801282	FALSE	FALSE	FALSE	FALSE	FALSE	FALSE	FALSE	FALSE	FALSE	FALSE	FALSE
HC	FL	rs1934394	FALSE	FALSE	FALSE	FALSE	FALSE	FALSE	FALSE	FALSE	FALSE	FALSE	FALSE
HC	FL	rs2133561	FALSE	FALSE	FALSE	FALSE	FALSE	FALSE	FALSE	FALSE	FALSE	FALSE	FALSE
HC	FL	rs2151248	FALSE	FALSE	FALSE	FALSE	FALSE	FALSE	FALSE	FALSE	FALSE	FALSE	FALSE
HC	FL	rs2270894	FALSE	FALSE	FALSE	FALSE	FALSE	FALSE	FALSE	FALSE	FALSE	FALSE	FALSE
HC	FL	rs25849	FALSE	FALSE	FALSE	FALSE	FALSE	FALSE	FALSE	FALSE	FALSE	FALSE	FALSE
HC	FL	rs2642305	FALSE	FALSE	FALSE	FALSE	FALSE	FALSE	FALSE	FALSE	FALSE	FALSE	FALSE
HC	FL	rs35792595	FALSE	FALSE	FALSE	FALSE	FALSE	FALSE	FALSE	FALSE	FALSE	FALSE	FALSE
HC	FL	rs35910339	FALSE	FALSE	FALSE	FALSE	FALSE	FALSE	FALSE	FALSE	FALSE	FALSE	FALSE
HC	FL	rs4820346	FALSE	FALSE	FALSE	FALSE	FALSE	FALSE	FALSE	FALSE	FALSE	FALSE	FALSE
HC	FL	rs4843158	FALSE	FALSE	FALSE	FALSE	FALSE	FALSE	FALSE	FALSE	FALSE	FALSE	FALSE
HC	FL	rs4897174	FALSE	FALSE	FALSE	FALSE	FALSE	FALSE	FALSE	FALSE	FALSE	FALSE	FALSE
HC	FL	rs4962424	FALSE	FALSE	FALSE	FALSE	FALSE	FALSE	FALSE	FALSE	FALSE	FALSE	FALSE
HC	FL	rs57222629	FALSE	FALSE	FALSE	FALSE	FALSE	FALSE	FALSE	FALSE	FALSE	FALSE	FALSE
HC	FL	rs61898343	FALSE	FALSE	FALSE	FALSE	FALSE	FALSE	FALSE	FALSE	FALSE	FALSE	FALSE
HC	FL	rs6606686	FALSE	FALSE	FALSE	FALSE	FALSE	FALSE	FALSE	FALSE	FALSE	FALSE	FALSE
HC	FL	rs667515	FALSE	FALSE	FALSE	FALSE	FALSE	FALSE	FALSE	FALSE	FALSE	FALSE	FALSE
HC	FL	rs73213484	FALSE	FALSE	FALSE	FALSE	FALSE	FALSE	FALSE	FALSE	FALSE	FALSE	FALSE
HC	FL	rs7442885	FALSE	FALSE	FALSE	FALSE	FALSE	FALSE	FALSE	FALSE	FALSE	FALSE	FALSE
HC	FL	rs754635	FALSE	FALSE	FALSE	FALSE	FALSE	FALSE	FALSE	FALSE	FALSE	FALSE	FALSE
HC	FL	rs7740107	FALSE	FALSE	FALSE	FALSE	FALSE	FALSE	FALSE	FALSE	FALSE	FALSE	FALSE
HC	FL	rs779655	FALSE	FALSE	FALSE	FALSE	FALSE	FALSE	FALSE	FALSE	FALSE	FALSE	FALSE
HC	FL	rs9788550	FALSE	FALSE	FALSE	FALSE	FALSE	FALSE	FALSE	FALSE	FALSE	FALSE	FALSE
HC	FL	rs9845755	FALSE	FALSE	FALSE	FALSE	FALSE	FALSE	FALSE	FALSE	FALSE	FALSE	FALSE
HC	FL	rs11014285	FALSE	FALSE	FALSE	FALSE	TRUE	FALSE	FALSE	FALSE	FALSE	FALSE	FALSE
HC	FL	rs11023199	FALSE	FALSE	FALSE	FALSE	TRUE	FALSE	FALSE	FALSE	FALSE	FALSE	FALSE
HC	FL	rs11030016	FALSE	FALSE	FALSE	FALSE	TRUE	FALSE	FALSE	FALSE	FALSE	FALSE	FALSE
HC	FL	rs11049684	FALSE	FALSE	FALSE	FALSE	TRUE	FALSE	FALSE	FALSE	FALSE	FALSE	FALSE
HC	FL	rs11060406	FALSE	FALSE	FALSE	FALSE	TRUE	FALSE	FALSE	FALSE	FALSE	FALSE	FALSE
HC	FL	rs11071182	FALSE	FALSE	FALSE	FALSE	TRUE	FALSE	FALSE	FALSE	FALSE	FALSE	FALSE
HC	FL	rs11071646	FALSE	FALSE	FALSE	FALSE	TRUE	FALSE	FALSE	FALSE	FALSE	FALSE	FALSE
HC	FL	rs1111817	FALSE	FALSE	FALSE	FALSE	TRUE	FALSE	FALSE	FALSE	FALSE	FALSE	FALSE
HC	FL	rs11150461	FALSE	FALSE	FALSE	FALSE	TRUE	FALSE	FALSE	FALSE	FALSE	FALSE	FALSE
HC	FL	rs11161044	FALSE	FALSE	FALSE	FALSE	TRUE	FALSE	FALSE	FALSE	FALSE	FALSE	FALSE
HC	FL	rs11165513	FALSE	FALSE	FALSE	FALSE	TRUE	FALSE	FALSE	FALSE	FALSE	FALSE	FALSE
HC	FL	rs111961170	FALSE	FALSE	FALSE	FALSE	TRUE	FALSE	FALSE	FALSE	FALSE	FALSE	FALSE
HC	FL	rs11205538	FALSE	FALSE	FALSE	FALSE	TRUE	FALSE	FALSE	FALSE	FALSE	FALSE	FALSE
HC	FL	rs11206730	FALSE	FALSE	FALSE	FALSE	TRUE	FALSE	FALSE	FALSE	FALSE	FALSE	FALSE
HC	FL	rs113789803	FALSE	FALSE	FALSE	FALSE	TRUE	FALSE	FALSE	FALSE	FALSE	FALSE	FALSE
HC	FL	rs7793674	FALSE	FALSE	TRUE	FALSE	FALSE	FALSE	FALSE	FALSE	FALSE	FALSE	FALSE
HC	FL	rs10954284	FALSE	TRUE	FALSE	FALSE	FALSE	FALSE	FALSE	FALSE	FALSE	FALSE	FALSE
HC	FL	rs11778934	FALSE	TRUE	FALSE	FALSE	FALSE	FALSE	FALSE	FALSE	FALSE	FALSE	FALSE
HC	FL	rs11882796	FALSE	TRUE	FALSE	FALSE	FALSE	FALSE	FALSE	FALSE	FALSE	FALSE	FALSE
HC	FL	rs12631813	FALSE	TRUE	FALSE	FALSE	FALSE	FALSE	FALSE	FALSE	FALSE	FALSE	FALSE
HC	FL	rs13264909	FALSE	TRUE	FALSE	FALSE	FALSE	FALSE	FALSE	FALSE	FALSE	FALSE	FALSE
HC	FL	rs133015	FALSE	TRUE	FALSE	FALSE	FALSE	FALSE	FALSE	FALSE	FALSE	FALSE	FALSE
HC	FL	rs2032251	FALSE	TRUE	FALSE	FALSE	FALSE	FALSE	FALSE	FALSE	FALSE	FALSE	FALSE
HC	FL	rs2238435	FALSE	TRUE	FALSE	FALSE	FALSE	FALSE	FALSE	FALSE	FALSE	FALSE	FALSE
HC	FL	rs2253310	FALSE	TRUE	FALSE	FALSE	FALSE	FALSE	FALSE	FALSE	FALSE	FALSE	FALSE
HC	FL	rs2371911	FALSE	TRUE	FALSE	FALSE	FALSE	FALSE	FALSE	FALSE	FALSE	FALSE	FALSE
HC	FL	rs2593169	FALSE	TRUE	FALSE	FALSE	FALSE	FALSE	FALSE	FALSE	FALSE	FALSE	FALSE
HC	FL	rs56097510	FALSE	TRUE	FALSE	FALSE	FALSE	FALSE	FALSE	FALSE	FALSE	FALSE	FALSE
HC	FL	rs6597975	FALSE	TRUE	FALSE	FALSE	FALSE	FALSE	FALSE	FALSE	FALSE	FALSE	FALSE
HC	FL	rs765874	FALSE	TRUE	FALSE	FALSE	FALSE	FALSE	FALSE	FALSE	FALSE	FALSE	FALSE
HC	FL	rs7695177	FALSE	TRUE	FALSE	FALSE	FALSE	FALSE	FALSE	FALSE	FALSE	FALSE	FALSE
HC	FL	rs7793674	FALSE	FALSE	TRUE	FALSE	FALSE	FALSE	FALSE	FALSE	FALSE	FALSE	FALSE
HC	FL	rs2253310	FALSE	TRUE	FALSE	FALSE	FALSE	FALSE	FALSE	FALSE	FALSE	FALSE	FALSE
Wt	FL	rs12765002	FALSE	FALSE	FALSE	FALSE	TRUE	FALSE	FALSE	FALSE	FALSE	FALSE	FALSE
Wt	FL	rs13007086	FALSE	FALSE	FALSE	FALSE	TRUE	FALSE	FALSE	FALSE	FALSE	FALSE	FALSE
Wt	FL	rs13007086	FALSE	FALSE	FALSE	FALSE	TRUE	FALSE	FALSE	FALSE	FALSE	FALSE	FALSE
Wt	FL	rs13007086	FALSE	FALSE	FALSE	FALSE	TRUE	FALSE	FALSE	FALSE	FALSE	FALSE	FALSE
Wt	FL	rs13007086	FALSE	FALSE	FALSE	FALSE	TRUE	FALSE	FALSE	FALSE	FALSE	FALSE	FALSE
Wt	FL	rs2568958	FALSE	FALSE	FALSE	FALSE	TRUE	FALSE	FALSE	FALSE	FALSE	FALSE	FALSE
Wt	FL	rs2568958	FALSE	FALSE	FALSE	FALSE	TRUE	FALSE	FALSE	FALSE	FALSE	FALSE	FALSE
Wt	FL	rs34517439	FALSE	FALSE	FALSE	FALSE	TRUE	FALSE	FALSE	FALSE	FALSE	FALSE	FALSE
Wt	FL	rs3845344	FALSE	FALSE	FALSE	FALSE	TRUE	FALSE	FALSE	FALSE	FALSE	FALSE	FALSE
Wt	FL	rs4653016	FALSE	FALSE	FALSE	FALSE	TRUE	FALSE	FALSE	FALSE	FALSE	FALSE	FALSE
Wt	FL	rs4851029	FALSE	FALSE	FALSE	FALSE	TRUE	FALSE	FALSE	FALSE	FALSE	FALSE	FALSE
Wt	FL	rs543874	FALSE	FALSE	FALSE	FALSE	TRUE	FALSE	FALSE	FALSE	FALSE	FALSE	FALSE
Wt	FL	rs543874	FALSE	FALSE	FALSE	FALSE	TRUE	FALSE	FALSE	FALSE	FALSE	FALSE	FALSE
Wt	FL	rs543874	FALSE	FALSE	FALSE	FALSE	TRUE	FALSE	FALSE	FALSE	FALSE	FALSE	FALSE
Wt	FL	rs543874	FALSE	FALSE	FALSE	FALSE	TRUE	FALSE	FALSE	FALSE	FALSE	FALSE	FALSE
Wt	FL	rs543874	FALSE	FALSE	FALSE	FALSE	TRUE	FALSE	FALSE	FALSE	FALSE	FALSE	FALSE
Wt	FL	rs62396185	FALSE	FALSE	FALSE	FALSE	TRUE	FALSE	FALSE	FALSE	FALSE	FALSE	FALSE
Wt	FL	rs62396185	FALSE	FALSE	FALSE	FALSE	TRUE	FALSE	FALSE	FALSE	FALSE	FALSE	FALSE
Wt	FL	rs6567160	FALSE	FALSE	FALSE	FALSE	TRUE	FALSE	FALSE	FALSE	FALSE	FALSE	FALSE
Wt	FL	rs6567160	FALSE	FALSE	FALSE	FALSE	TRUE	FALSE	FALSE	FALSE	FALSE	FALSE	FALSE
Wt	FL	rs6567160	FALSE	FALSE	FALSE	FALSE	TRUE	FALSE	FALSE	FALSE	FALSE	FALSE	FALSE
Wt	FL	rs6567160	FALSE	FALSE	FALSE	FALSE	TRUE	FALSE	FALSE	FALSE	FALSE	FALSE	FALSE
Wt	FL	rs6567160	FALSE	FALSE	FALSE	FALSE	TRUE	FALSE	FALSE	FALSE	FALSE	FALSE	FALSE
Wt	FL	rs6567160	FALSE	FALSE	FALSE	FALSE	TRUE	FALSE	FALSE	FALSE	FALSE	FALSE	FALSE
Wt	FL	rs6567160	FALSE	FALSE	FALSE	FALSE	TRUE	FALSE	FALSE	FALSE	FALSE	FALSE	FALSE
Wt	FL	rs6585827	FALSE	FALSE	FALSE	FALSE	TRUE	FALSE	FALSE	FALSE	FALSE	FALSE	FALSE
Wt	FL	rs7132908	FALSE	FALSE	FALSE	FALSE	TRUE	FALSE	FALSE	FALSE	FALSE	FALSE	FALSE
Wt	FL	rs73048928	FALSE	FALSE	FALSE	FALSE	TRUE	FALSE	FALSE	FALSE	FALSE	FALSE	FALSE
Wt	FL	rs7632381	FALSE	FALSE	FALSE	FALSE	TRUE	FALSE	FALSE	FALSE	FALSE	FALSE	FALSE
Wt	FL	rs7632381	FALSE	FALSE	FALSE	FALSE	TRUE	FALSE	FALSE	FALSE	FALSE	FALSE	FALSE
Wt	FL	rs9401501	FALSE	FALSE	FALSE	FALSE	TRUE	FALSE	FALSE	FALSE	FALSE	FALSE	FALSE
Wt	FL	rs9835772	FALSE	FALSE	FALSE	FALSE	TRUE	FALSE	FALSE	FALSE	FALSE	FALSE	FALSE
Wt	FL	rs9876664	FALSE	FALSE	FALSE	FALSE	TRUE	FALSE	FALSE	FALSE	FALSE	FALSE	FALSE
Wt	FL	rs10063744	FALSE	TRUE	FALSE	FALSE	FALSE	FALSE	FALSE	FALSE	FALSE	FALSE	FALSE
Wt	FL	rs10158176	FALSE	TRUE	FALSE	FALSE	FALSE	FALSE	FALSE	FALSE	FALSE	FALSE	FALSE
Wt	FL	rs10423928	FALSE	TRUE	FALSE	FALSE	FALSE	FALSE	FALSE	FALSE	FALSE	FALSE	FALSE
Wt	FL	rs10740991	FALSE	TRUE	FALSE	FALSE	FALSE	FALSE	FALSE	FALSE	FALSE	FALSE	FALSE
Wt	FL	rs10795084	FALSE	TRUE	FALSE	FALSE	FALSE	FALSE	FALSE	FALSE	FALSE	FALSE	FALSE
Wt	FL	rs10851978	FALSE	TRUE	FALSE	FALSE	FALSE	FALSE	FALSE	FALSE	FALSE	FALSE	FALSE
Wt	FL	rs10853340	FALSE	TRUE	FALSE	FALSE	FALSE	FALSE	FALSE	FALSE	FALSE	FALSE	FALSE
Wt	FL	rs10865534	FALSE	TRUE	FALSE	FALSE	FALSE	FALSE	FALSE	FALSE	FALSE	FALSE	FALSE
Wt	FL	rs11150461	FALSE	TRUE	FALSE	FALSE	FALSE	FALSE	FALSE	FALSE	FALSE	FALSE	FALSE
Wt	FL	rs11161044	FALSE	TRUE	FALSE	FALSE	FALSE	FALSE	FALSE	FALSE	FALSE	FALSE	FALSE
Wt	FL	rs11216315	FALSE	TRUE	FALSE	FALSE	FALSE	FALSE	FALSE	FALSE	FALSE	FALSE	FALSE
Wt	FL	rs112329422	FALSE	TRUE	FALSE	FALSE	FALSE	FALSE	FALSE	FALSE	FALSE	FALSE	FALSE
Wt	FL	rs11245188	FALSE	TRUE	FALSE	FALSE	FALSE	FALSE	FALSE	FALSE	FALSE	FALSE	FALSE
Wt	FL	rs115771494	FALSE	TRUE	FALSE	FALSE	FALSE	FALSE	FALSE	FALSE	FALSE	FALSE	FALSE
Wt	FL	rs11680549	FALSE	TRUE	FALSE	FALSE	FALSE	FALSE	FALSE	FALSE	FALSE	FALSE	FALSE
Wt	FL	rs117176448	FALSE	TRUE	FALSE	FALSE	FALSE	FALSE	FALSE	FALSE	FALSE	FALSE	FALSE
Wt	FL	rs117319490	FALSE	TRUE	FALSE	FALSE	FALSE	FALSE	FALSE	FALSE	FALSE	FALSE	FALSE
Wt	FL	rs11863963	FALSE	TRUE	FALSE	FALSE	FALSE	FALSE	FALSE	FALSE	FALSE	FALSE	FALSE
Wt	FL	rs1187321	FALSE	TRUE	FALSE	FALSE	FALSE	FALSE	FALSE	FALSE	FALSE	FALSE	FALSE
Wt	FL	rs11997525	FALSE	TRUE	FALSE	FALSE	FALSE	FALSE	FALSE	FALSE	FALSE	FALSE	FALSE
Wt	FL	rs12449219	FALSE	TRUE	FALSE	FALSE	FALSE	FALSE	FALSE	FALSE	FALSE	FALSE	FALSE
Wt	FL	rs12723378	FALSE	TRUE	FALSE	FALSE	FALSE	FALSE	FALSE	FALSE	FALSE	FALSE	FALSE
Wt	FL	rs1286058	FALSE	TRUE	FALSE	FALSE	FALSE	FALSE	FALSE	FALSE	FALSE	FALSE	FALSE
Wt	FL	rs1291114	FALSE	TRUE	FALSE	FALSE	FALSE	FALSE	FALSE	FALSE	FALSE	FALSE	FALSE
Wt	FL	rs13007086	FALSE	TRUE	FALSE	FALSE	FALSE	FALSE	FALSE	FALSE	FALSE	FALSE	FALSE
Wt	FL	rs13218383	FALSE	TRUE	FALSE	FALSE	FALSE	FALSE	FALSE	FALSE	FALSE	FALSE	FALSE
Wt	FL	rs145350287	FALSE	TRUE	FALSE	FALSE	FALSE	FALSE	FALSE	FALSE	FALSE	FALSE	FALSE
Wt	FL	rs148636479	FALSE	TRUE	FALSE	FALSE	FALSE	FALSE	FALSE	FALSE	FALSE	FALSE	FALSE
Wt	FL	rs1606739	FALSE	TRUE	FALSE	FALSE	FALSE	FALSE	FALSE	FALSE	FALSE	FALSE	FALSE
Wt	FL	rs16868443	FALSE	TRUE	FALSE	FALSE	FALSE	FALSE	FALSE	FALSE	FALSE	FALSE	FALSE
Wt	FL	rs17016665	FALSE	TRUE	FALSE	FALSE	FALSE	FALSE	FALSE	FALSE	FALSE	FALSE	FALSE
Wt	FL	rs17167315	FALSE	TRUE	FALSE	FALSE	FALSE	FALSE	FALSE	FALSE	FALSE	FALSE	FALSE
Wt	FL	rs1801282	FALSE	TRUE	FALSE	FALSE	FALSE	FALSE	FALSE	FALSE	FALSE	FALSE	FALSE
Wt	FL	rs1968109	FALSE	TRUE	FALSE	FALSE	FALSE	FALSE	FALSE	FALSE	FALSE	FALSE	FALSE
Wt	FL	rs2016235	FALSE	TRUE	FALSE	FALSE	FALSE	FALSE	FALSE	FALSE	FALSE	FALSE	FALSE
Wt	FL	rs2079860	FALSE	TRUE	FALSE	FALSE	FALSE	FALSE	FALSE	FALSE	FALSE	FALSE	FALSE
Wt	FL	rs2120450	FALSE	TRUE	FALSE	FALSE	FALSE	FALSE	FALSE	FALSE	FALSE	FALSE	FALSE
Wt	FL	rs2270894	FALSE	TRUE	FALSE	FALSE	FALSE	FALSE	FALSE	FALSE	FALSE	FALSE	FALSE
Wt	FL	rs2530399	FALSE	TRUE	FALSE	FALSE	FALSE	FALSE	FALSE	FALSE	FALSE	FALSE	FALSE
Wt	FL	rs25849	FALSE	TRUE	FALSE	FALSE	FALSE	FALSE	FALSE	FALSE	FALSE	FALSE	FALSE
Wt	FL	rs28547477	FALSE	TRUE	FALSE	FALSE	FALSE	FALSE	FALSE	FALSE	FALSE	FALSE	FALSE
Wt	FL	rs28601761	FALSE	TRUE	FALSE	FALSE	FALSE	FALSE	FALSE	FALSE	FALSE	FALSE	FALSE
Wt	FL	rs2870710	FALSE	TRUE	FALSE	FALSE	FALSE	FALSE	FALSE	FALSE	FALSE	FALSE	FALSE
Wt	FL	rs291263	FALSE	TRUE	FALSE	FALSE	FALSE	FALSE	FALSE	FALSE	FALSE	FALSE	FALSE
Wt	FL	rs35792595	FALSE	TRUE	FALSE	FALSE	FALSE	FALSE	FALSE	FALSE	FALSE	FALSE	FALSE
Wt	FL	rs4290239	FALSE	TRUE	FALSE	FALSE	FALSE	FALSE	FALSE	FALSE	FALSE	FALSE	FALSE
Wt	FL	rs4776970	FALSE	TRUE	FALSE	FALSE	FALSE	FALSE	FALSE	FALSE	FALSE	FALSE	FALSE
Wt	FL	rs4851283	FALSE	TRUE	FALSE	FALSE	FALSE	FALSE	FALSE	FALSE	FALSE	FALSE	FALSE
Wt	FL	rs4966012	FALSE	TRUE	FALSE	FALSE	FALSE	FALSE	FALSE	FALSE	FALSE	FALSE	FALSE
Wt	FL	rs56228832	FALSE	TRUE	FALSE	FALSE	FALSE	FALSE	FALSE	FALSE	FALSE	FALSE	FALSE
Wt	FL	rs6069016	FALSE	TRUE	FALSE	FALSE	FALSE	FALSE	FALSE	FALSE	FALSE	FALSE	FALSE
Wt	FL	rs61875762	FALSE	TRUE	FALSE	FALSE	FALSE	FALSE	FALSE	FALSE	FALSE	FALSE	FALSE
Wt	FL	rs61898343	FALSE	TRUE	FALSE	FALSE	FALSE	FALSE	FALSE	FALSE	FALSE	FALSE	FALSE
Wt	FL	rs62396185	FALSE	TRUE	FALSE	FALSE	FALSE	FALSE	FALSE	FALSE	FALSE	FALSE	FALSE
Wt	FL	rs62491284	FALSE	TRUE	FALSE	FALSE	FALSE	FALSE	FALSE	FALSE	FALSE	FALSE	FALSE
Wt	FL	rs667515	FALSE	TRUE	FALSE	FALSE	FALSE	FALSE	FALSE	FALSE	FALSE	FALSE	FALSE
Wt	FL	rs6696828	FALSE	TRUE	FALSE	FALSE	FALSE	FALSE	FALSE	FALSE	FALSE	FALSE	FALSE
Wt	FL	rs67747001	FALSE	TRUE	FALSE	FALSE	FALSE	FALSE	FALSE	FALSE	FALSE	FALSE	FALSE
Wt	FL	rs6774894	FALSE	TRUE	FALSE	FALSE	FALSE	FALSE	FALSE	FALSE	FALSE	FALSE	FALSE
Wt	FL	rs7073150	FALSE	TRUE	FALSE	FALSE	FALSE	FALSE	FALSE	FALSE	FALSE	FALSE	FALSE
Wt	FL	rs7442885	FALSE	TRUE	FALSE	FALSE	FALSE	FALSE	FALSE	FALSE	FALSE	FALSE	FALSE
Wt	FL	rs754635	FALSE	TRUE	FALSE	FALSE	FALSE	FALSE	FALSE	FALSE	FALSE	FALSE	FALSE
Wt	FL	rs75982888	FALSE	TRUE	FALSE	FALSE	FALSE	FALSE	FALSE	FALSE	FALSE	FALSE	FALSE
Wt	FL	rs7619139	FALSE	TRUE	FALSE	FALSE	FALSE	FALSE	FALSE	FALSE	FALSE	FALSE	FALSE
Wt	FL	rs7740107	FALSE	TRUE	FALSE	FALSE	FALSE	FALSE	FALSE	FALSE	FALSE	FALSE	FALSE
Wt	FL	rs779655	FALSE	TRUE	FALSE	FALSE	FALSE	FALSE	FALSE	FALSE	FALSE	FALSE	FALSE
Wt	FL	rs78470967	FALSE	TRUE	FALSE	FALSE	FALSE	FALSE	FALSE	FALSE	FALSE	FALSE	FALSE
Wt	FL	rs7933019	FALSE	TRUE	FALSE	FALSE	FALSE	FALSE	FALSE	FALSE	FALSE	FALSE	FALSE
Wt	FL	rs7946756	FALSE	TRUE	FALSE	FALSE	FALSE	FALSE	FALSE	FALSE	FALSE	FALSE	FALSE
Wt	FL	rs8118253	FALSE	TRUE	FALSE	FALSE	FALSE	FALSE	FALSE	FALSE	FALSE	FALSE	FALSE
Wt	FL	rs900448	FALSE	TRUE	FALSE	FALSE	FALSE	FALSE	FALSE	FALSE	FALSE	FALSE	FALSE
Wt	FL	rs9478499	FALSE	TRUE	FALSE	FALSE	FALSE	FALSE	FALSE	FALSE	FALSE	FALSE	FALSE
Wt	FL	rs961288	FALSE	TRUE	FALSE	FALSE	FALSE	FALSE	FALSE	FALSE	FALSE	FALSE	FALSE
Wt	FL	rs11234234	FALSE	TRUE	FALSE	FALSE	FALSE	FALSE	FALSE	FALSE	FALSE	FALSE	FALSE
Wt	FL	rs11250094	FALSE	TRUE	FALSE	FALSE	FALSE	FALSE	FALSE	FALSE	FALSE	FALSE	FALSE
Wt	FL	rs12031920	FALSE	TRUE	FALSE	FALSE	FALSE	FALSE	FALSE	FALSE	FALSE	FALSE	FALSE
Wt	FL	rs12981806	FALSE	TRUE	FALSE	FALSE	FALSE	FALSE	FALSE	FALSE	FALSE	FALSE	FALSE
Wt	FL	rs13264909	FALSE	TRUE	FALSE	FALSE	FALSE	FALSE	FALSE	FALSE	FALSE	FALSE	FALSE
Wt	FL	rs1454687	FALSE	TRUE	FALSE	FALSE	FALSE	FALSE	FALSE	FALSE	FALSE	FALSE	FALSE
Wt	FL	rs3097851	FALSE	TRUE	FALSE	FALSE	FALSE	FALSE	FALSE	FALSE	FALSE	FALSE	FALSE
Wt	FL	rs361222	FALSE	TRUE	FALSE	FALSE	FALSE	FALSE	FALSE	FALSE	FALSE	FALSE	FALSE
Wt	FL	rs4243765	FALSE	TRUE	FALSE	FALSE	FALSE	FALSE	FALSE	FALSE	FALSE	FALSE	FALSE
Wt	FL	rs6597975	FALSE	TRUE	FALSE	FALSE	FALSE	FALSE	FALSE	FALSE	FALSE	FALSE	FALSE
Wt	FL	rs765874	FALSE	TRUE	FALSE	FALSE	FALSE	FALSE	FALSE	FALSE	FALSE	FALSE	FALSE
Wt	FL	rs7942152	FALSE	TRUE	FALSE	FALSE	FALSE	FALSE	FALSE	FALSE	FALSE	FALSE	FALSE
Wt	FL	rs9614090	FALSE	TRUE	FALSE	FALSE	FALSE	FALSE	FALSE	FALSE	FALSE	FALSE	FALSE
Wt	FL	rs9650469	FALSE	TRUE	FALSE	FALSE	FALSE	FALSE	FALSE	FALSE	FALSE	FALSE	FALSE
BMI	DLBCL	rs10182416	FALSE	FALSE	FALSE	FALSE	TRUE	FALSE	FALSE	FALSE	FALSE	FALSE	FALSE
BMI	DLBCL	rs10927006	FALSE	FALSE	FALSE	FALSE	TRUE	FALSE	FALSE	FALSE	FALSE	FALSE	FALSE
BMI	DLBCL	rs34517439	FALSE	FALSE	FALSE	FALSE	TRUE	FALSE	FALSE	FALSE	FALSE	FALSE	FALSE
BMI	DLBCL	rs3901286	FALSE	FALSE	FALSE	FALSE	TRUE	FALSE	FALSE	FALSE	FALSE	FALSE	FALSE
BMI	DLBCL	rs57803	FALSE	FALSE	FALSE	FALSE	TRUE	FALSE	FALSE	FALSE	FALSE	FALSE	FALSE
BMI	DLBCL	rs6265	FALSE	FALSE	FALSE	FALSE	TRUE	FALSE	FALSE	FALSE	FALSE	FALSE	FALSE
BMI	DLBCL	rs6265	FALSE	FALSE	FALSE	FALSE	TRUE	FALSE	FALSE	FALSE	FALSE	FALSE	FALSE
BMI	DLBCL	rs6265	FALSE	FALSE	FALSE	FALSE	TRUE	FALSE	FALSE	FALSE	FALSE	FALSE	FALSE
BMI	DLBCL	rs6265	FALSE	FALSE	FALSE	FALSE	TRUE	FALSE	FALSE	FALSE	FALSE	FALSE	FALSE
BMI	DLBCL	rs6265	FALSE	FALSE	FALSE	FALSE	TRUE	FALSE	FALSE	FALSE	FALSE	FALSE	FALSE
BMI	DLBCL	rs6265	FALSE	FALSE	FALSE	FALSE	TRUE	FALSE	FALSE	FALSE	FALSE	FALSE	FALSE
BMI	DLBCL	rs6265	FALSE	FALSE	FALSE	FALSE	TRUE	FALSE	FALSE	FALSE	FALSE	FALSE	FALSE
BMI	DLBCL	rs6669189	FALSE	FALSE	FALSE	FALSE	TRUE	FALSE	FALSE	FALSE	FALSE	FALSE	FALSE
BMI	DLBCL	rs6682438	FALSE	FALSE	FALSE	FALSE	TRUE	FALSE	FALSE	FALSE	FALSE	FALSE	FALSE
BMI	DLBCL	rs6744646	FALSE	FALSE	FALSE	FALSE	TRUE	FALSE	FALSE	FALSE	FALSE	FALSE	FALSE
BMI	DLBCL	rs6744646	FALSE	FALSE	FALSE	FALSE	TRUE	FALSE	FALSE	FALSE	FALSE	FALSE	FALSE
BMI	DLBCL	rs6744646	FALSE	FALSE	FALSE	FALSE	TRUE	FALSE	FALSE	FALSE	FALSE	FALSE	FALSE
BMI	DLBCL	rs6744646	FALSE	FALSE	FALSE	FALSE	TRUE	FALSE	FALSE	FALSE	FALSE	FALSE	FALSE
BMI	DLBCL	rs6938973	FALSE	FALSE	FALSE	FALSE	TRUE	FALSE	FALSE	FALSE	FALSE	FALSE	FALSE
BMI	DLBCL	rs7513580	FALSE	FALSE	FALSE	FALSE	TRUE	FALSE	FALSE	FALSE	FALSE	FALSE	FALSE
BMI	DLBCL	rs9926784	FALSE	FALSE	FALSE	FALSE	TRUE	FALSE	FALSE	FALSE	FALSE	FALSE	FALSE
BMI	DLBCL	rs9926784	FALSE	FALSE	FALSE	FALSE	TRUE	FALSE	FALSE	FALSE	FALSE	FALSE	FALSE
BMI	DLBCL	rs10160769	FALSE	TRUE	FALSE	FALSE	FALSE	FALSE	FALSE	FALSE	FALSE	FALSE	FALSE
BMI	DLBCL	rs10423928	FALSE	TRUE	FALSE	FALSE	FALSE	FALSE	FALSE	FALSE	FALSE	FALSE	FALSE
BMI	DLBCL	rs10809621	FALSE	TRUE	FALSE	FALSE	FALSE	FALSE	FALSE	FALSE	FALSE	FALSE	FALSE
BMI	DLBCL	rs111689389	FALSE	TRUE	FALSE	FALSE	FALSE	FALSE	FALSE	FALSE	FALSE	FALSE	FALSE
BMI	DLBCL	rs1126930	FALSE	TRUE	FALSE	FALSE	FALSE	FALSE	FALSE	FALSE	FALSE	FALSE	FALSE
BMI	DLBCL	rs11610621	FALSE	TRUE	FALSE	FALSE	FALSE	FALSE	FALSE	FALSE	FALSE	FALSE	FALSE
BMI	DLBCL	rs117118217	FALSE	TRUE	FALSE	FALSE	FALSE	FALSE	FALSE	FALSE	FALSE	FALSE	FALSE
BMI	DLBCL	rs1286058	FALSE	TRUE	FALSE	FALSE	FALSE	FALSE	FALSE	FALSE	FALSE	FALSE	FALSE
BMI	DLBCL	rs13097918	FALSE	TRUE	FALSE	FALSE	FALSE	FALSE	FALSE	FALSE	FALSE	FALSE	FALSE
BMI	DLBCL	rs13218383	FALSE	TRUE	FALSE	FALSE	FALSE	FALSE	FALSE	FALSE	FALSE	FALSE	FALSE
BMI	DLBCL	rs13642	FALSE	TRUE	FALSE	FALSE	FALSE	FALSE	FALSE	FALSE	FALSE	FALSE	FALSE
BMI	DLBCL	rs1438945	FALSE	TRUE	FALSE	FALSE	FALSE	FALSE	FALSE	FALSE	FALSE	FALSE	FALSE
BMI	DLBCL	rs156201	FALSE	TRUE	FALSE	FALSE	FALSE	FALSE	FALSE	FALSE	FALSE	FALSE	FALSE
BMI	DLBCL	rs17132130	FALSE	TRUE	FALSE	FALSE	FALSE	FALSE	FALSE	FALSE	FALSE	FALSE	FALSE
BMI	DLBCL	rs17218879	FALSE	TRUE	FALSE	FALSE	FALSE	FALSE	FALSE	FALSE	FALSE	FALSE	FALSE
BMI	DLBCL	rs17446299	FALSE	TRUE	FALSE	FALSE	FALSE	FALSE	FALSE	FALSE	FALSE	FALSE	FALSE
BMI	DLBCL	rs17668356	FALSE	TRUE	FALSE	FALSE	FALSE	FALSE	FALSE	FALSE	FALSE	FALSE	FALSE
BMI	DLBCL	rs1793636	FALSE	TRUE	FALSE	FALSE	FALSE	FALSE	FALSE	FALSE	FALSE	FALSE	FALSE
BMI	DLBCL	rs2075466	FALSE	TRUE	FALSE	FALSE	FALSE	FALSE	FALSE	FALSE	FALSE	FALSE	FALSE
BMI	DLBCL	rs2133561	FALSE	TRUE	FALSE	FALSE	FALSE	FALSE	FALSE	FALSE	FALSE	FALSE	FALSE
BMI	DLBCL	rs2875762	FALSE	TRUE	FALSE	FALSE	FALSE	FALSE	FALSE	FALSE	FALSE	FALSE	FALSE
BMI	DLBCL	rs2922757	FALSE	TRUE	FALSE	FALSE	FALSE	FALSE	FALSE	FALSE	FALSE	FALSE	FALSE
BMI	DLBCL	rs317656	FALSE	TRUE	FALSE	FALSE	FALSE	FALSE	FALSE	FALSE	FALSE	FALSE	FALSE
BMI	DLBCL	rs32421	FALSE	TRUE	FALSE	FALSE	FALSE	FALSE	FALSE	FALSE	FALSE	FALSE	FALSE
BMI	DLBCL	rs35697691	FALSE	TRUE	FALSE	FALSE	FALSE	FALSE	FALSE	FALSE	FALSE	FALSE	FALSE
BMI	DLBCL	rs3851998	FALSE	TRUE	FALSE	FALSE	FALSE	FALSE	FALSE	FALSE	FALSE	FALSE	FALSE
BMI	DLBCL	rs406388	FALSE	TRUE	FALSE	FALSE	FALSE	FALSE	FALSE	FALSE	FALSE	FALSE	FALSE
BMI	DLBCL	rs5011579	FALSE	TRUE	FALSE	FALSE	FALSE	FALSE	FALSE	FALSE	FALSE	FALSE	FALSE
BMI	DLBCL	rs56161855	FALSE	TRUE	FALSE	FALSE	FALSE	FALSE	FALSE	FALSE	FALSE	FALSE	FALSE
BMI	DLBCL	rs62020775	FALSE	TRUE	FALSE	FALSE	FALSE	FALSE	FALSE	FALSE	FALSE	FALSE	FALSE
BMI	DLBCL	rs62176243	FALSE	TRUE	FALSE	FALSE	FALSE	FALSE	FALSE	FALSE	FALSE	FALSE	FALSE
BMI	DLBCL	rs62190049	FALSE	TRUE	FALSE	FALSE	FALSE	FALSE	FALSE	FALSE	FALSE	FALSE	FALSE
BMI	DLBCL	rs62407562	FALSE	TRUE	FALSE	FALSE	FALSE	FALSE	FALSE	FALSE	FALSE	FALSE	FALSE
BMI	DLBCL	rs6561937	FALSE	TRUE	FALSE	FALSE	FALSE	FALSE	FALSE	FALSE	FALSE	FALSE	FALSE
BMI	DLBCL	rs6710091	FALSE	TRUE	FALSE	FALSE	FALSE	FALSE	FALSE	FALSE	FALSE	FALSE	FALSE
BMI	DLBCL	rs6713781	FALSE	TRUE	FALSE	FALSE	FALSE	FALSE	FALSE	FALSE	FALSE	FALSE	FALSE
BMI	DLBCL	rs6769617	FALSE	TRUE	FALSE	FALSE	FALSE	FALSE	FALSE	FALSE	FALSE	FALSE	FALSE
BMI	DLBCL	rs6774894	FALSE	TRUE	FALSE	FALSE	FALSE	FALSE	FALSE	FALSE	FALSE	FALSE	FALSE
BMI	DLBCL	rs705158	FALSE	TRUE	FALSE	FALSE	FALSE	FALSE	FALSE	FALSE	FALSE	FALSE	FALSE
BMI	DLBCL	rs7206608	FALSE	TRUE	FALSE	FALSE	FALSE	FALSE	FALSE	FALSE	FALSE	FALSE	FALSE
BMI	DLBCL	rs73213484	FALSE	TRUE	FALSE	FALSE	FALSE	FALSE	FALSE	FALSE	FALSE	FALSE	FALSE
BMI	DLBCL	rs7442885	FALSE	TRUE	FALSE	FALSE	FALSE	FALSE	FALSE	FALSE	FALSE	FALSE	FALSE
BMI	DLBCL	rs7539903	FALSE	TRUE	FALSE	FALSE	FALSE	FALSE	FALSE	FALSE	FALSE	FALSE	FALSE
BMI	DLBCL	rs754635	FALSE	TRUE	FALSE	FALSE	FALSE	FALSE	FALSE	FALSE	FALSE	FALSE	FALSE
BMI	DLBCL	rs7619139	FALSE	TRUE	FALSE	FALSE	FALSE	FALSE	FALSE	FALSE	FALSE	FALSE	FALSE
BMI	DLBCL	rs76702514	FALSE	TRUE	FALSE	FALSE	FALSE	FALSE	FALSE	FALSE	FALSE	FALSE	FALSE
BMI	DLBCL	rs7761673	FALSE	TRUE	FALSE	FALSE	FALSE	FALSE	FALSE	FALSE	FALSE	FALSE	FALSE
BMI	DLBCL	rs80135274	FALSE	TRUE	FALSE	FALSE	FALSE	FALSE	FALSE	FALSE	FALSE	FALSE	FALSE
BMI	DLBCL	rs8020365	FALSE	TRUE	FALSE	FALSE	FALSE	FALSE	FALSE	FALSE	FALSE	FALSE	FALSE
BMI	DLBCL	rs8024137	FALSE	TRUE	FALSE	FALSE	FALSE	FALSE	FALSE	FALSE	FALSE	FALSE	FALSE
BMI	DLBCL	rs8089514	FALSE	TRUE	FALSE	FALSE	FALSE	FALSE	FALSE	FALSE	FALSE	FALSE	FALSE
BMI	DLBCL	rs909001	FALSE	TRUE	FALSE	FALSE	FALSE	FALSE	FALSE	FALSE	FALSE	FALSE	FALSE
BMI	DLBCL	rs9835772	FALSE	TRUE	FALSE	FALSE	FALSE	FALSE	FALSE	FALSE	FALSE	FALSE	FALSE
BMI	DLBCL	rs7928320	FALSE	FALSE	TRUE	FALSE	FALSE	FALSE	FALSE	FALSE	FALSE	FALSE	FALSE
BMI	DLBCL	rs9674487	FALSE	FALSE	TRUE	FALSE	FALSE	FALSE	FALSE	FALSE	FALSE	FALSE	FALSE
BMI	DLBCL	rs10832778	FALSE	TRUE	FALSE	FALSE	FALSE	FALSE	FALSE	FALSE	FALSE	FALSE	FALSE
BMI	DLBCL	rs10887578	FALSE	TRUE	FALSE	FALSE	FALSE	FALSE	FALSE	FALSE	FALSE	FALSE	FALSE
BMI	DLBCL	rs11250094	FALSE	TRUE	FALSE	FALSE	FALSE	FALSE	FALSE	FALSE	FALSE	FALSE	FALSE
BMI	DLBCL	rs11634851	FALSE	TRUE	FALSE	FALSE	FALSE	FALSE	FALSE	FALSE	FALSE	FALSE	FALSE
BMI	DLBCL	rs12507026	FALSE	TRUE	FALSE	FALSE	FALSE	FALSE	FALSE	FALSE	FALSE	FALSE	FALSE
BMI	DLBCL	rs1454687	FALSE	TRUE	FALSE	FALSE	FALSE	FALSE	FALSE	FALSE	FALSE	FALSE	FALSE
BMI	DLBCL	rs1608113	FALSE	TRUE	FALSE	FALSE	FALSE	FALSE	FALSE	FALSE	FALSE	FALSE	FALSE
BMI	DLBCL	rs1860750	FALSE	TRUE	FALSE	FALSE	FALSE	FALSE	FALSE	FALSE	FALSE	FALSE	FALSE
BMI	DLBCL	rs2253310	FALSE	TRUE	FALSE	FALSE	FALSE	FALSE	FALSE	FALSE	FALSE	FALSE	FALSE
BMI	DLBCL	rs2396625	FALSE	TRUE	FALSE	FALSE	FALSE	FALSE	FALSE	FALSE	FALSE	FALSE	FALSE
BMI	DLBCL	rs2618039	FALSE	TRUE	FALSE	FALSE	FALSE	FALSE	FALSE	FALSE	FALSE	FALSE	FALSE
BMI	DLBCL	rs347551	FALSE	TRUE	FALSE	FALSE	FALSE	FALSE	FALSE	FALSE	FALSE	FALSE	FALSE
BMI	DLBCL	rs355777	FALSE	TRUE	FALSE	FALSE	FALSE	FALSE	FALSE	FALSE	FALSE	FALSE	FALSE
BMI	DLBCL	rs396755	FALSE	TRUE	FALSE	FALSE	FALSE	FALSE	FALSE	FALSE	FALSE	FALSE	FALSE
BMI	DLBCL	rs4419475	FALSE	TRUE	FALSE	FALSE	FALSE	FALSE	FALSE	FALSE	FALSE	FALSE	FALSE
BMI	DLBCL	rs4737188	FALSE	TRUE	FALSE	FALSE	FALSE	FALSE	FALSE	FALSE	FALSE	FALSE	FALSE
BMI	DLBCL	rs59086897	FALSE	TRUE	FALSE	FALSE	FALSE	FALSE	FALSE	FALSE	FALSE	FALSE	FALSE
BMI	DLBCL	rs6597975	FALSE	TRUE	FALSE	FALSE	FALSE	FALSE	FALSE	FALSE	FALSE	FALSE	FALSE
BMI	DLBCL	rs7568228	FALSE	TRUE	FALSE	FALSE	FALSE	FALSE	FALSE	FALSE	FALSE	FALSE	FALSE
BMI	DLBCL	rs765874	FALSE	TRUE	FALSE	FALSE	FALSE	FALSE	FALSE	FALSE	FALSE	FALSE	FALSE
BMI	DLBCL	rs7704382	FALSE	TRUE	FALSE	FALSE	FALSE	FALSE	FALSE	FALSE	FALSE	FALSE	FALSE
BMI	DLBCL	rs9388446	FALSE	TRUE	FALSE	FALSE	FALSE	FALSE	FALSE	FALSE	FALSE	FALSE	FALSE
BMI	DLBCL	rs961498	FALSE	TRUE	FALSE	FALSE	FALSE	FALSE	FALSE	FALSE	FALSE	FALSE	FALSE
WBFM	DLBCL	rs10423928	FALSE	TRUE	FALSE	FALSE	FALSE	FALSE	FALSE	FALSE	FALSE	FALSE	FALSE
WBFM	DLBCL	rs10499014	FALSE	TRUE	FALSE	FALSE	FALSE	FALSE	FALSE	FALSE	FALSE	FALSE	FALSE
WBFM	DLBCL	rs11075256	FALSE	TRUE	FALSE	FALSE	FALSE	FALSE	FALSE	FALSE	FALSE	FALSE	FALSE
WBFM	DLBCL	rs11129446	FALSE	TRUE	FALSE	FALSE	FALSE	FALSE	FALSE	FALSE	FALSE	FALSE	FALSE
WBFM	DLBCL	rs11152135	FALSE	TRUE	FALSE	FALSE	FALSE	FALSE	FALSE	FALSE	FALSE	FALSE	FALSE
WBFM	DLBCL	rs11664848	FALSE	TRUE	FALSE	FALSE	FALSE	FALSE	FALSE	FALSE	FALSE	FALSE	FALSE
WBFM	DLBCL	rs117176448	FALSE	TRUE	FALSE	FALSE	FALSE	FALSE	FALSE	FALSE	FALSE	FALSE	FALSE
WBFM	DLBCL	rs11926024	FALSE	TRUE	FALSE	FALSE	FALSE	FALSE	FALSE	FALSE	FALSE	FALSE	FALSE
WBFM	DLBCL	rs13218383	FALSE	TRUE	FALSE	FALSE	FALSE	FALSE	FALSE	FALSE	FALSE	FALSE	FALSE
WBFM	DLBCL	rs1383723	FALSE	TRUE	FALSE	FALSE	FALSE	FALSE	FALSE	FALSE	FALSE	FALSE	FALSE
WBFM	DLBCL	rs148636479	FALSE	TRUE	FALSE	FALSE	FALSE	FALSE	FALSE	FALSE	FALSE	FALSE	FALSE
WBFM	DLBCL	rs1568488	FALSE	TRUE	FALSE	FALSE	FALSE	FALSE	FALSE	FALSE	FALSE	FALSE	FALSE
WBFM	DLBCL	rs17668356	FALSE	TRUE	FALSE	FALSE	FALSE	FALSE	FALSE	FALSE	FALSE	FALSE	FALSE
WBFM	DLBCL	rs17681686	FALSE	TRUE	FALSE	FALSE	FALSE	FALSE	FALSE	FALSE	FALSE	FALSE	FALSE
WBFM	DLBCL	rs17744603	FALSE	TRUE	FALSE	FALSE	FALSE	FALSE	FALSE	FALSE	FALSE	FALSE	FALSE
WBFM	DLBCL	rs1782508	FALSE	TRUE	FALSE	FALSE	FALSE	FALSE	FALSE	FALSE	FALSE	FALSE	FALSE
WBFM	DLBCL	rs1801282	FALSE	TRUE	FALSE	FALSE	FALSE	FALSE	FALSE	FALSE	FALSE	FALSE	FALSE
WBFM	DLBCL	rs2249825	FALSE	TRUE	FALSE	FALSE	FALSE	FALSE	FALSE	FALSE	FALSE	FALSE	FALSE
WBFM	DLBCL	rs35099456	FALSE	TRUE	FALSE	FALSE	FALSE	FALSE	FALSE	FALSE	FALSE	FALSE	FALSE
WBFM	DLBCL	rs35589149	FALSE	TRUE	FALSE	FALSE	FALSE	FALSE	FALSE	FALSE	FALSE	FALSE	FALSE
WBFM	DLBCL	rs35697691	FALSE	TRUE	FALSE	FALSE	FALSE	FALSE	FALSE	FALSE	FALSE	FALSE	FALSE
WBFM	DLBCL	rs3754963	FALSE	TRUE	FALSE	FALSE	FALSE	FALSE	FALSE	FALSE	FALSE	FALSE	FALSE
WBFM	DLBCL	rs3817428	FALSE	TRUE	FALSE	FALSE	FALSE	FALSE	FALSE	FALSE	FALSE	FALSE	FALSE
WBFM	DLBCL	rs4820323	FALSE	TRUE	FALSE	FALSE	FALSE	FALSE	FALSE	FALSE	FALSE	FALSE	FALSE
WBFM	DLBCL	rs61779305	FALSE	TRUE	FALSE	FALSE	FALSE	FALSE	FALSE	FALSE	FALSE	FALSE	FALSE
WBFM	DLBCL	rs62396185	FALSE	TRUE	FALSE	FALSE	FALSE	FALSE	FALSE	FALSE	FALSE	FALSE	FALSE
WBFM	DLBCL	rs6561937	FALSE	TRUE	FALSE	FALSE	FALSE	FALSE	FALSE	FALSE	FALSE	FALSE	FALSE
WBFM	DLBCL	rs6606686	FALSE	TRUE	FALSE	FALSE	FALSE	FALSE	FALSE	FALSE	FALSE	FALSE	FALSE
WBFM	DLBCL	rs6769617	FALSE	TRUE	FALSE	FALSE	FALSE	FALSE	FALSE	FALSE	FALSE	FALSE	FALSE
WBFM	DLBCL	rs73213484	FALSE	TRUE	FALSE	FALSE	FALSE	FALSE	FALSE	FALSE	FALSE	FALSE	FALSE
WBFM	DLBCL	rs7442885	FALSE	TRUE	FALSE	FALSE	FALSE	FALSE	FALSE	FALSE	FALSE	FALSE	FALSE
WBFM	DLBCL	rs754635	FALSE	TRUE	FALSE	FALSE	FALSE	FALSE	FALSE	FALSE	FALSE	FALSE	FALSE
WBFM	DLBCL	rs75524125	FALSE	TRUE	FALSE	FALSE	FALSE	FALSE	FALSE	FALSE	FALSE	FALSE	FALSE
WBFM	DLBCL	rs7619139	FALSE	TRUE	FALSE	FALSE	FALSE	FALSE	FALSE	FALSE	FALSE	FALSE	FALSE
WBFM	DLBCL	rs76702514	FALSE	TRUE	FALSE	FALSE	FALSE	FALSE	FALSE	FALSE	FALSE	FALSE	FALSE
WBFM	DLBCL	rs79197301	FALSE	TRUE	FALSE	FALSE	FALSE	FALSE	FALSE	FALSE	FALSE	FALSE	FALSE
WBFM	DLBCL	rs80197460	FALSE	TRUE	FALSE	FALSE	FALSE	FALSE	FALSE	FALSE	FALSE	FALSE	FALSE
WBFM	DLBCL	rs8074454	FALSE	TRUE	FALSE	FALSE	FALSE	FALSE	FALSE	FALSE	FALSE	FALSE	FALSE
WBFM	DLBCL	rs825680	FALSE	TRUE	FALSE	FALSE	FALSE	FALSE	FALSE	FALSE	FALSE	FALSE	FALSE
WBFM	DLBCL	rs900448	FALSE	TRUE	FALSE	FALSE	FALSE	FALSE	FALSE	FALSE	FALSE	FALSE	FALSE
WBFM	DLBCL	rs9304665	FALSE	TRUE	FALSE	FALSE	FALSE	FALSE	FALSE	FALSE	FALSE	FALSE	FALSE
WBFM	DLBCL	rs9615937	FALSE	TRUE	FALSE	FALSE	FALSE	FALSE	FALSE	FALSE	FALSE	FALSE	FALSE
WBFM	DLBCL	rs9788550	FALSE	TRUE	FALSE	FALSE	FALSE	FALSE	FALSE	FALSE	FALSE	FALSE	FALSE
WBFM	DLBCL	rs10187101	FALSE	FALSE	FALSE	FALSE	TRUE	FALSE	FALSE	FALSE	FALSE	FALSE	FALSE
WBFM	DLBCL	rs10927006	FALSE	FALSE	FALSE	FALSE	TRUE	FALSE	FALSE	FALSE	FALSE	FALSE	FALSE
WBFM	DLBCL	rs11066301	FALSE	FALSE	FALSE	FALSE	TRUE	FALSE	FALSE	FALSE	FALSE	FALSE	FALSE
WBFM	DLBCL	rs1915792	FALSE	FALSE	FALSE	FALSE	TRUE	FALSE	FALSE	FALSE	FALSE	FALSE	FALSE
WBFM	DLBCL	rs2568958	FALSE	FALSE	FALSE	FALSE	TRUE	FALSE	FALSE	FALSE	FALSE	FALSE	FALSE
WBFM	DLBCL	rs2568958	FALSE	FALSE	FALSE	FALSE	TRUE	FALSE	FALSE	FALSE	FALSE	FALSE	FALSE
WBFM	DLBCL	rs2814993	FALSE	FALSE	FALSE	FALSE	TRUE	FALSE	FALSE	FALSE	FALSE	FALSE	FALSE
WBFM	DLBCL	rs2814993	FALSE	FALSE	FALSE	FALSE	TRUE	FALSE	FALSE	FALSE	FALSE	FALSE	FALSE
WBFM	DLBCL	rs34517439	FALSE	FALSE	FALSE	FALSE	TRUE	FALSE	FALSE	FALSE	FALSE	FALSE	FALSE
WBFM	DLBCL	rs543874	FALSE	FALSE	FALSE	FALSE	TRUE	FALSE	FALSE	FALSE	FALSE	FALSE	FALSE
WBFM	DLBCL	rs543874	FALSE	FALSE	FALSE	FALSE	TRUE	FALSE	FALSE	FALSE	FALSE	FALSE	FALSE
WBFM	DLBCL	rs543874	FALSE	FALSE	FALSE	FALSE	TRUE	FALSE	FALSE	FALSE	FALSE	FALSE	FALSE
WBFM	DLBCL	rs543874	FALSE	FALSE	FALSE	FALSE	TRUE	FALSE	FALSE	FALSE	FALSE	FALSE	FALSE
WBFM	DLBCL	rs543874	FALSE	FALSE	FALSE	FALSE	TRUE	FALSE	FALSE	FALSE	FALSE	FALSE	FALSE
WBFM	DLBCL	rs62396185	FALSE	FALSE	FALSE	FALSE	TRUE	FALSE	FALSE	FALSE	FALSE	FALSE	FALSE
WBFM	DLBCL	rs62396185	FALSE	FALSE	FALSE	FALSE	TRUE	FALSE	FALSE	FALSE	FALSE	FALSE	FALSE
WBFM	DLBCL	rs6567160	FALSE	FALSE	FALSE	FALSE	TRUE	FALSE	FALSE	FALSE	FALSE	FALSE	FALSE
WBFM	DLBCL	rs6567160	FALSE	FALSE	FALSE	FALSE	TRUE	FALSE	FALSE	FALSE	FALSE	FALSE	FALSE
WBFM	DLBCL	rs6567160	FALSE	FALSE	FALSE	FALSE	TRUE	FALSE	FALSE	FALSE	FALSE	FALSE	FALSE
WBFM	DLBCL	rs6567160	FALSE	FALSE	FALSE	FALSE	TRUE	FALSE	FALSE	FALSE	FALSE	FALSE	FALSE
WBFM	DLBCL	rs6567160	FALSE	FALSE	FALSE	FALSE	TRUE	FALSE	FALSE	FALSE	FALSE	FALSE	FALSE
WBFM	DLBCL	rs6567160	FALSE	FALSE	FALSE	FALSE	TRUE	FALSE	FALSE	FALSE	FALSE	FALSE	FALSE
WBFM	DLBCL	rs6567160	FALSE	FALSE	FALSE	FALSE	TRUE	FALSE	FALSE	FALSE	FALSE	FALSE	FALSE
WBFM	DLBCL	rs6669189	FALSE	FALSE	FALSE	FALSE	TRUE	FALSE	FALSE	FALSE	FALSE	FALSE	FALSE
WBFM	DLBCL	rs6744646	FALSE	FALSE	FALSE	FALSE	TRUE	FALSE	FALSE	FALSE	FALSE	FALSE	FALSE
WBFM	DLBCL	rs6744646	FALSE	FALSE	FALSE	FALSE	TRUE	FALSE	FALSE	FALSE	FALSE	FALSE	FALSE
WBFM	DLBCL	rs6744646	FALSE	FALSE	FALSE	FALSE	TRUE	FALSE	FALSE	FALSE	FALSE	FALSE	FALSE
WBFM	DLBCL	rs6744646	FALSE	FALSE	FALSE	FALSE	TRUE	FALSE	FALSE	FALSE	FALSE	FALSE	FALSE
WBFM	DLBCL	rs677522	FALSE	FALSE	FALSE	FALSE	TRUE	FALSE	FALSE	FALSE	FALSE	FALSE	FALSE
WBFM	DLBCL	rs7132908	FALSE	FALSE	FALSE	FALSE	TRUE	FALSE	FALSE	FALSE	FALSE	FALSE	FALSE
WBFM	DLBCL	rs743572	FALSE	FALSE	FALSE	FALSE	TRUE	FALSE	FALSE	FALSE	FALSE	FALSE	FALSE
WBFM	DLBCL	rs7632381	FALSE	FALSE	FALSE	FALSE	TRUE	FALSE	FALSE	FALSE	FALSE	FALSE	FALSE
WBFM	DLBCL	rs7632381	FALSE	FALSE	FALSE	FALSE	TRUE	FALSE	FALSE	FALSE	FALSE	FALSE	FALSE
WBFM	DLBCL	rs9304665	FALSE	FALSE	FALSE	FALSE	TRUE	FALSE	FALSE	FALSE	FALSE	FALSE	FALSE
WBFM	DLBCL	rs9304665	FALSE	FALSE	FALSE	FALSE	TRUE	FALSE	FALSE	FALSE	FALSE	FALSE	FALSE
WBFM	DLBCL	rs9304665	FALSE	FALSE	FALSE	FALSE	TRUE	FALSE	FALSE	FALSE	FALSE	FALSE	FALSE
WBFM	DLBCL	rs9320823	FALSE	FALSE	FALSE	FALSE	TRUE	FALSE	FALSE	FALSE	FALSE	FALSE	FALSE
WBFM	DLBCL	rs9400481	FALSE	FALSE	FALSE	FALSE	TRUE	FALSE	FALSE	FALSE	FALSE	FALSE	FALSE
WBFM	DLBCL	rs9876664	FALSE	TRUE	FALSE	FALSE	TRUE	FALSE	FALSE	FALSE	FALSE	FALSE	FALSE
WBFM	DLBCL	rs10887578	FALSE	TRUE	FALSE	FALSE	FALSE	FALSE	FALSE	FALSE	FALSE	FALSE	FALSE
WBFM	DLBCL	rs11208779	FALSE	TRUE	FALSE	FALSE	FALSE	FALSE	FALSE	FALSE	FALSE	FALSE	FALSE
WBFM	DLBCL	rs11778934	FALSE	TRUE	FALSE	FALSE	FALSE	FALSE	FALSE	FALSE	FALSE	FALSE	FALSE
WBFM	DLBCL	rs1216547	FALSE	TRUE	FALSE	FALSE	FALSE	FALSE	FALSE	FALSE	FALSE	FALSE	FALSE
WBFM	DLBCL	rs2143975	FALSE	TRUE	FALSE	FALSE	FALSE	FALSE	FALSE	FALSE	FALSE	FALSE	FALSE
WBFM	DLBCL	rs2470937	FALSE	TRUE	FALSE	FALSE	FALSE	FALSE	FALSE	FALSE	FALSE	FALSE	FALSE
WBFM	DLBCL	rs2692741	FALSE	TRUE	FALSE	FALSE	FALSE	FALSE	FALSE	FALSE	FALSE	FALSE	FALSE
WBFM	DLBCL	rs361222	FALSE	TRUE	FALSE	FALSE	FALSE	FALSE	FALSE	FALSE	FALSE	FALSE	FALSE
WBFM	DLBCL	rs4757136	FALSE	TRUE	FALSE	FALSE	FALSE	FALSE	FALSE	FALSE	FALSE	FALSE	FALSE
WBFM	DLBCL	rs55685371	FALSE	TRUE	FALSE	FALSE	FALSE	FALSE	FALSE	FALSE	FALSE	FALSE	FALSE
WBFM	DLBCL	rs912690	FALSE	TRUE	FALSE	FALSE	FALSE	FALSE	FALSE	FALSE	FALSE	FALSE	FALSE
WBFM	DLBCL	rs12926311	FALSE	FALSE	TRUE	FALSE	FALSE	FALSE	FALSE	FALSE	FALSE	FALSE	FALSE
WBFM	DLBCL	rs2731238	FALSE	FALSE	TRUE	FALSE	FALSE	FALSE	FALSE	FALSE	FALSE	FALSE	FALSE
WBFM	DLBCL	rs2943634	FALSE	FALSE	TRUE	FALSE	FALSE	FALSE	FALSE	FALSE	FALSE	FALSE	FALSE
WBFFM	DLBCL	rs10269774	FALSE	FALSE	FALSE	FALSE	TRUE	FALSE	FALSE	FALSE	FALSE	FALSE	FALSE
WBFFM	DLBCL	rs10938397	FALSE	FALSE	FALSE	FALSE	TRUE	FALSE	FALSE	FALSE	FALSE	FALSE	FALSE
WBFFM	DLBCL	rs10938397	FALSE	FALSE	FALSE	FALSE	TRUE	FALSE	FALSE	FALSE	FALSE	FALSE	FALSE
WBFFM	DLBCL	rs10938397	FALSE	FALSE	FALSE	FALSE	TRUE	FALSE	FALSE	FALSE	FALSE	FALSE	FALSE
WBFFM	DLBCL	rs11611651	FALSE	FALSE	FALSE	FALSE	TRUE	FALSE	FALSE	FALSE	FALSE	FALSE	FALSE
WBFFM	DLBCL	rs12967135	FALSE	FALSE	FALSE	FALSE	TRUE	FALSE	FALSE	FALSE	FALSE	FALSE	FALSE
WBFFM	DLBCL	rs12967135	FALSE	FALSE	FALSE	FALSE	TRUE	FALSE	FALSE	FALSE	FALSE	FALSE	FALSE
WBFFM	DLBCL	rs12967135	FALSE	FALSE	FALSE	FALSE	TRUE	FALSE	FALSE	FALSE	FALSE	FALSE	FALSE
WBFFM	DLBCL	rs12967135	FALSE	FALSE	FALSE	FALSE	TRUE	FALSE	FALSE	FALSE	FALSE	FALSE	FALSE
WBFFM	DLBCL	rs2265309	FALSE	FALSE	FALSE	FALSE	TRUE	FALSE	FALSE	FALSE	FALSE	FALSE	FALSE
WBFFM	DLBCL	rs2568958	FALSE	FALSE	FALSE	FALSE	TRUE	FALSE	FALSE	FALSE	FALSE	FALSE	FALSE
WBFFM	DLBCL	rs2568958	FALSE	FALSE	FALSE	FALSE	TRUE	FALSE	FALSE	FALSE	FALSE	FALSE	FALSE
WBFFM	DLBCL	rs34517439	FALSE	FALSE	FALSE	FALSE	TRUE	FALSE	FALSE	FALSE	FALSE	FALSE	FALSE
WBFFM	DLBCL	rs3810291	FALSE	FALSE	FALSE	FALSE	TRUE	FALSE	FALSE	FALSE	FALSE	FALSE	FALSE
WBFFM	DLBCL	rs3810291	FALSE	FALSE	FALSE	FALSE	TRUE	FALSE	FALSE	FALSE	FALSE	FALSE	FALSE
WBFFM	DLBCL	rs3810291	FALSE	FALSE	FALSE	FALSE	TRUE	FALSE	FALSE	FALSE	FALSE	FALSE	FALSE
WBFFM	DLBCL	rs3810291	FALSE	FALSE	FALSE	FALSE	TRUE	FALSE	FALSE	FALSE	FALSE	FALSE	FALSE
WBFFM	DLBCL	rs3810291	FALSE	FALSE	FALSE	FALSE	TRUE	FALSE	FALSE	FALSE	FALSE	FALSE	FALSE
WBFFM	DLBCL	rs4369779	FALSE	FALSE	FALSE	FALSE	TRUE	FALSE	FALSE	FALSE	FALSE	FALSE	FALSE
WBFFM	DLBCL	rs4369779	FALSE	FALSE	FALSE	FALSE	TRUE	FALSE	FALSE	FALSE	FALSE	FALSE	FALSE
WBFFM	DLBCL	rs4369779	FALSE	FALSE	FALSE	FALSE	TRUE	FALSE	FALSE	FALSE	FALSE	FALSE	FALSE
WBFFM	DLBCL	rs527248	FALSE	FALSE	FALSE	FALSE	TRUE	FALSE	FALSE	FALSE	FALSE	FALSE	FALSE
WBFFM	DLBCL	rs527248	FALSE	FALSE	FALSE	FALSE	TRUE	FALSE	FALSE	FALSE	FALSE	FALSE	FALSE
WBFFM	DLBCL	rs527248	FALSE	FALSE	FALSE	FALSE	TRUE	FALSE	FALSE	FALSE	FALSE	FALSE	FALSE
WBFFM	DLBCL	rs55745410	FALSE	FALSE	FALSE	FALSE	TRUE	FALSE	FALSE	FALSE	FALSE	FALSE	FALSE
WBFFM	DLBCL	rs6585827	FALSE	FALSE	FALSE	FALSE	TRUE	FALSE	FALSE	FALSE	FALSE	FALSE	FALSE
WBFFM	DLBCL	rs6669189	FALSE	FALSE	FALSE	FALSE	TRUE	FALSE	FALSE	FALSE	FALSE	FALSE	FALSE
WBFFM	DLBCL	rs6743060	FALSE	FALSE	FALSE	FALSE	TRUE	FALSE	FALSE	FALSE	FALSE	FALSE	FALSE
WBFFM	DLBCL	rs6743060	FALSE	FALSE	FALSE	FALSE	TRUE	FALSE	FALSE	FALSE	FALSE	FALSE	FALSE
WBFFM	DLBCL	rs6743060	FALSE	FALSE	FALSE	FALSE	TRUE	FALSE	FALSE	FALSE	FALSE	FALSE	FALSE
WBFFM	DLBCL	rs6743060	FALSE	FALSE	FALSE	FALSE	TRUE	FALSE	FALSE	FALSE	FALSE	FALSE	FALSE
WBFFM	DLBCL	rs6779752	FALSE	FALSE	FALSE	FALSE	TRUE	FALSE	FALSE	FALSE	FALSE	FALSE	FALSE
WBFFM	DLBCL	rs7132908	FALSE	FALSE	FALSE	FALSE	TRUE	FALSE	FALSE	FALSE	FALSE	FALSE	FALSE
WBFFM	DLBCL	rs10188231	FALSE	TRUE	FALSE	FALSE	FALSE	FALSE	FALSE	FALSE	FALSE	FALSE	FALSE
WBFFM	DLBCL	rs10412300	FALSE	TRUE	FALSE	FALSE	FALSE	FALSE	FALSE	FALSE	FALSE	FALSE	FALSE
WBFFM	DLBCL	rs1049193	FALSE	TRUE	FALSE	FALSE	FALSE	FALSE	FALSE	FALSE	FALSE	FALSE	FALSE
WBFFM	DLBCL	rs10498672	FALSE	TRUE	FALSE	FALSE	FALSE	FALSE	FALSE	FALSE	FALSE	FALSE	FALSE
WBFFM	DLBCL	rs10853340	FALSE	TRUE	FALSE	FALSE	FALSE	FALSE	FALSE	FALSE	FALSE	FALSE	FALSE
WBFFM	DLBCL	rs10939792	FALSE	TRUE	FALSE	FALSE	FALSE	FALSE	FALSE	FALSE	FALSE	FALSE	FALSE
WBFFM	DLBCL	rs11018104	FALSE	TRUE	FALSE	FALSE	FALSE	FALSE	FALSE	FALSE	FALSE	FALSE	FALSE
WBFFM	DLBCL	rs11052457	FALSE	TRUE	FALSE	FALSE	FALSE	FALSE	FALSE	FALSE	FALSE	FALSE	FALSE
WBFFM	DLBCL	rs111640872	FALSE	TRUE	FALSE	FALSE	FALSE	FALSE	FALSE	FALSE	FALSE	FALSE	FALSE
WBFFM	DLBCL	rs113401980	FALSE	TRUE	FALSE	FALSE	FALSE	FALSE	FALSE	FALSE	FALSE	FALSE	FALSE
WBFFM	DLBCL	rs113619763	FALSE	TRUE	FALSE	FALSE	FALSE	FALSE	FALSE	FALSE	FALSE	FALSE	FALSE
WBFFM	DLBCL	rs11695471	FALSE	TRUE	FALSE	FALSE	FALSE	FALSE	FALSE	FALSE	FALSE	FALSE	FALSE
WBFFM	DLBCL	rs11782103	FALSE	TRUE	FALSE	FALSE	FALSE	FALSE	FALSE	FALSE	FALSE	FALSE	FALSE
WBFFM	DLBCL	rs11997525	FALSE	TRUE	FALSE	FALSE	FALSE	FALSE	FALSE	FALSE	FALSE	FALSE	FALSE
WBFFM	DLBCL	rs1229674	FALSE	TRUE	FALSE	FALSE	FALSE	FALSE	FALSE	FALSE	FALSE	FALSE	FALSE
WBFFM	DLBCL	rs12730853	FALSE	TRUE	FALSE	FALSE	FALSE	FALSE	FALSE	FALSE	FALSE	FALSE	FALSE
WBFFM	DLBCL	rs1461107	FALSE	TRUE	FALSE	FALSE	FALSE	FALSE	FALSE	FALSE	FALSE	FALSE	FALSE
WBFFM	DLBCL	rs1519343	FALSE	TRUE	FALSE	FALSE	FALSE	FALSE	FALSE	FALSE	FALSE	FALSE	FALSE
WBFFM	DLBCL	rs1573891	FALSE	TRUE	FALSE	FALSE	FALSE	FALSE	FALSE	FALSE	FALSE	FALSE	FALSE
WBFFM	DLBCL	rs1666157	FALSE	TRUE	FALSE	FALSE	FALSE	FALSE	FALSE	FALSE	FALSE	FALSE	FALSE
WBFFM	DLBCL	rs17167315	FALSE	TRUE	FALSE	FALSE	FALSE	FALSE	FALSE	FALSE	FALSE	FALSE	FALSE
WBFFM	DLBCL	rs1846221	FALSE	TRUE	FALSE	FALSE	FALSE	FALSE	FALSE	FALSE	FALSE	FALSE	FALSE
WBFFM	DLBCL	rs1928850	FALSE	TRUE	FALSE	FALSE	FALSE	FALSE	FALSE	FALSE	FALSE	FALSE	FALSE
WBFFM	DLBCL	rs1937684	FALSE	TRUE	FALSE	FALSE	FALSE	FALSE	FALSE	FALSE	FALSE	FALSE	FALSE
WBFFM	DLBCL	rs2270894	FALSE	TRUE	FALSE	FALSE	FALSE	FALSE	FALSE	FALSE	FALSE	FALSE	FALSE
WBFFM	DLBCL	rs2530399	FALSE	TRUE	FALSE	FALSE	FALSE	FALSE	FALSE	FALSE	FALSE	FALSE	FALSE
WBFFM	DLBCL	rs25849	FALSE	TRUE	FALSE	FALSE	FALSE	FALSE	FALSE	FALSE	FALSE	FALSE	FALSE
WBFFM	DLBCL	rs2749807	FALSE	TRUE	FALSE	FALSE	FALSE	FALSE	FALSE	FALSE	FALSE	FALSE	FALSE
WBFFM	DLBCL	rs286501	FALSE	TRUE	FALSE	FALSE	FALSE	FALSE	FALSE	FALSE	FALSE	FALSE	FALSE
WBFFM	DLBCL	rs2952615	FALSE	TRUE	FALSE	FALSE	FALSE	FALSE	FALSE	FALSE	FALSE	FALSE	FALSE
WBFFM	DLBCL	rs3212260	FALSE	TRUE	FALSE	FALSE	FALSE	FALSE	FALSE	FALSE	FALSE	FALSE	FALSE
WBFFM	DLBCL	rs34227797	FALSE	TRUE	FALSE	FALSE	FALSE	FALSE	FALSE	FALSE	FALSE	FALSE	FALSE
WBFFM	DLBCL	rs35629473	FALSE	TRUE	FALSE	FALSE	FALSE	FALSE	FALSE	FALSE	FALSE	FALSE	FALSE
WBFFM	DLBCL	rs3843750	FALSE	TRUE	FALSE	FALSE	FALSE	FALSE	FALSE	FALSE	FALSE	FALSE	FALSE
WBFFM	DLBCL	rs3906769	FALSE	TRUE	FALSE	FALSE	FALSE	FALSE	FALSE	FALSE	FALSE	FALSE	FALSE
WBFFM	DLBCL	rs41458449	FALSE	TRUE	FALSE	FALSE	FALSE	FALSE	FALSE	FALSE	FALSE	FALSE	FALSE
WBFFM	DLBCL	rs4268495	FALSE	TRUE	FALSE	FALSE	FALSE	FALSE	FALSE	FALSE	FALSE	FALSE	FALSE
WBFFM	DLBCL	rs4800670	FALSE	TRUE	FALSE	FALSE	FALSE	FALSE	FALSE	FALSE	FALSE	FALSE	FALSE
WBFFM	DLBCL	rs485554	FALSE	TRUE	FALSE	FALSE	FALSE	FALSE	FALSE	FALSE	FALSE	FALSE	FALSE
WBFFM	DLBCL	rs4865956	FALSE	TRUE	FALSE	FALSE	FALSE	FALSE	FALSE	FALSE	FALSE	FALSE	FALSE
WBFFM	DLBCL	rs4899012	FALSE	TRUE	FALSE	FALSE	FALSE	FALSE	FALSE	FALSE	FALSE	FALSE	FALSE
WBFFM	DLBCL	rs4968799	FALSE	TRUE	FALSE	FALSE	FALSE	FALSE	FALSE	FALSE	FALSE	FALSE	FALSE
WBFFM	DLBCL	rs6026578	FALSE	TRUE	FALSE	FALSE	FALSE	FALSE	FALSE	FALSE	FALSE	FALSE	FALSE
WBFFM	DLBCL	rs60590479	FALSE	TRUE	FALSE	FALSE	FALSE	FALSE	FALSE	FALSE	FALSE	FALSE	FALSE
WBFFM	DLBCL	rs6235	FALSE	TRUE	FALSE	FALSE	FALSE	FALSE	FALSE	FALSE	FALSE	FALSE	FALSE
WBFFM	DLBCL	rs62439025	FALSE	TRUE	FALSE	FALSE	FALSE	FALSE	FALSE	FALSE	FALSE	FALSE	FALSE
WBFFM	DLBCL	rs62621400	FALSE	TRUE	FALSE	FALSE	FALSE	FALSE	FALSE	FALSE	FALSE	FALSE	FALSE
WBFFM	DLBCL	rs6435043	FALSE	TRUE	FALSE	FALSE	FALSE	FALSE	FALSE	FALSE	FALSE	FALSE	FALSE
WBFFM	DLBCL	rs663344	FALSE	TRUE	FALSE	FALSE	FALSE	FALSE	FALSE	FALSE	FALSE	FALSE	FALSE
WBFFM	DLBCL	rs667515	FALSE	TRUE	FALSE	FALSE	FALSE	FALSE	FALSE	FALSE	FALSE	FALSE	FALSE
WBFFM	DLBCL	rs72703409	FALSE	TRUE	FALSE	FALSE	FALSE	FALSE	FALSE	FALSE	FALSE	FALSE	FALSE
WBFFM	DLBCL	rs72860117	FALSE	TRUE	FALSE	FALSE	FALSE	FALSE	FALSE	FALSE	FALSE	FALSE	FALSE
WBFFM	DLBCL	rs73213484	FALSE	TRUE	FALSE	FALSE	FALSE	FALSE	FALSE	FALSE	FALSE	FALSE	FALSE
WBFFM	DLBCL	rs7619139	FALSE	TRUE	FALSE	FALSE	FALSE	FALSE	FALSE	FALSE	FALSE	FALSE	FALSE
WBFFM	DLBCL	rs76307059	FALSE	TRUE	FALSE	FALSE	FALSE	FALSE	FALSE	FALSE	FALSE	FALSE	FALSE
WBFFM	DLBCL	rs7662187	FALSE	TRUE	FALSE	FALSE	FALSE	FALSE	FALSE	FALSE	FALSE	FALSE	FALSE
WBFFM	DLBCL	rs77093479	FALSE	TRUE	FALSE	FALSE	FALSE	FALSE	FALSE	FALSE	FALSE	FALSE	FALSE
WBFFM	DLBCL	rs773145	FALSE	TRUE	FALSE	FALSE	FALSE	FALSE	FALSE	FALSE	FALSE	FALSE	FALSE
WBFFM	DLBCL	rs7740107	FALSE	TRUE	FALSE	FALSE	FALSE	FALSE	FALSE	FALSE	FALSE	FALSE	FALSE
WBFFM	DLBCL	rs7815955	FALSE	TRUE	FALSE	FALSE	FALSE	FALSE	FALSE	FALSE	FALSE	FALSE	FALSE
WBFFM	DLBCL	rs7842996	FALSE	TRUE	FALSE	FALSE	FALSE	FALSE	FALSE	FALSE	FALSE	FALSE	FALSE
WBFFM	DLBCL	rs843374	FALSE	TRUE	FALSE	FALSE	FALSE	FALSE	FALSE	FALSE	FALSE	FALSE	FALSE
WBFFM	DLBCL	rs892511	FALSE	TRUE	FALSE	FALSE	FALSE	FALSE	FALSE	FALSE	FALSE	FALSE	FALSE
WBFFM	DLBCL	rs9328846	FALSE	TRUE	FALSE	FALSE	FALSE	FALSE	FALSE	FALSE	FALSE	FALSE	FALSE
WBFFM	DLBCL	rs9371883	FALSE	TRUE	FALSE	FALSE	FALSE	FALSE	FALSE	FALSE	FALSE	FALSE	FALSE
WBFFM	DLBCL	rs9480933	FALSE	TRUE	FALSE	FALSE	FALSE	FALSE	FALSE	FALSE	FALSE	FALSE	FALSE
WBFFM	DLBCL	rs9513510	FALSE	TRUE	FALSE	FALSE	FALSE	FALSE	FALSE	FALSE	FALSE	FALSE	FALSE
WBFFM	DLBCL	rs968821	FALSE	TRUE	FALSE	FALSE	FALSE	FALSE	FALSE	FALSE	FALSE	FALSE	FALSE
WBFFM	DLBCL	rs9783665	FALSE	TRUE	FALSE	FALSE	FALSE	FALSE	FALSE	FALSE	FALSE	FALSE	FALSE
WBFFM	DLBCL	rs981002	FALSE	TRUE	FALSE	FALSE	FALSE	FALSE	FALSE	FALSE	FALSE	FALSE	FALSE
WBFFM	DLBCL	rs9827636	FALSE	TRUE	FALSE	FALSE	FALSE	FALSE	FALSE	FALSE	FALSE	FALSE	FALSE
WBFFM	DLBCL	rs9898189	FALSE	TRUE	FALSE	FALSE	FALSE	FALSE	FALSE	FALSE	FALSE	FALSE	FALSE
WBFFM	DLBCL	rs77760034	FALSE	FALSE	TRUE	FALSE	FALSE	FALSE	FALSE	FALSE	FALSE	FALSE	FALSE
WC	DLBCL	rs10245306	FALSE	TRUE	FALSE	FALSE	FALSE	FALSE	FALSE	FALSE	FALSE	FALSE	FALSE
WC	DLBCL	rs10423928	FALSE	TRUE	FALSE	FALSE	FALSE	FALSE	FALSE	FALSE	FALSE	FALSE	FALSE
WC	DLBCL	rs10490869	FALSE	TRUE	FALSE	FALSE	FALSE	FALSE	FALSE	FALSE	FALSE	FALSE	FALSE
WC	DLBCL	rs10499014	FALSE	TRUE	FALSE	FALSE	FALSE	FALSE	FALSE	FALSE	FALSE	FALSE	FALSE
WC	DLBCL	rs10835676	FALSE	TRUE	FALSE	FALSE	FALSE	FALSE	FALSE	FALSE	FALSE	FALSE	FALSE
WC	DLBCL	rs10842240	FALSE	TRUE	FALSE	FALSE	FALSE	FALSE	FALSE	FALSE	FALSE	FALSE	FALSE
WC	DLBCL	rs10858334	FALSE	TRUE	FALSE	FALSE	FALSE	FALSE	FALSE	FALSE	FALSE	FALSE	FALSE
WC	DLBCL	rs10957087	FALSE	TRUE	FALSE	FALSE	FALSE	FALSE	FALSE	FALSE	FALSE	FALSE	FALSE
WC	DLBCL	rs10958933	FALSE	TRUE	FALSE	FALSE	FALSE	FALSE	FALSE	FALSE	FALSE	FALSE	FALSE
WC	DLBCL	rs10962550	FALSE	TRUE	FALSE	FALSE	FALSE	FALSE	FALSE	FALSE	FALSE	FALSE	FALSE
WC	DLBCL	rs1111817	FALSE	TRUE	FALSE	FALSE	FALSE	FALSE	FALSE	FALSE	FALSE	FALSE	FALSE
WC	DLBCL	rs1117619	FALSE	TRUE	FALSE	FALSE	FALSE	FALSE	FALSE	FALSE	FALSE	FALSE	FALSE
WC	DLBCL	rs116909769	FALSE	TRUE	FALSE	FALSE	FALSE	FALSE	FALSE	FALSE	FALSE	FALSE	FALSE
WC	DLBCL	rs117767939	FALSE	TRUE	FALSE	FALSE	FALSE	FALSE	FALSE	FALSE	FALSE	FALSE	FALSE
WC	DLBCL	rs1183668	FALSE	TRUE	FALSE	FALSE	FALSE	FALSE	FALSE	FALSE	FALSE	FALSE	FALSE
WC	DLBCL	rs12287076	FALSE	TRUE	FALSE	FALSE	FALSE	FALSE	FALSE	FALSE	FALSE	FALSE	FALSE
WC	DLBCL	rs12549000	FALSE	TRUE	FALSE	FALSE	FALSE	FALSE	FALSE	FALSE	FALSE	FALSE	FALSE
WC	DLBCL	rs12964145	FALSE	TRUE	FALSE	FALSE	FALSE	FALSE	FALSE	FALSE	FALSE	FALSE	FALSE
WC	DLBCL	rs143223871	FALSE	TRUE	FALSE	FALSE	FALSE	FALSE	FALSE	FALSE	FALSE	FALSE	FALSE
WC	DLBCL	rs145350287	FALSE	TRUE	FALSE	FALSE	FALSE	FALSE	FALSE	FALSE	FALSE	FALSE	FALSE
WC	DLBCL	rs1507331	FALSE	TRUE	FALSE	FALSE	FALSE	FALSE	FALSE	FALSE	FALSE	FALSE	FALSE
WC	DLBCL	rs1570298	FALSE	TRUE	FALSE	FALSE	FALSE	FALSE	FALSE	FALSE	FALSE	FALSE	FALSE
WC	DLBCL	rs1592732	FALSE	TRUE	FALSE	FALSE	FALSE	FALSE	FALSE	FALSE	FALSE	FALSE	FALSE
WC	DLBCL	rs1603490	FALSE	TRUE	FALSE	FALSE	FALSE	FALSE	FALSE	FALSE	FALSE	FALSE	FALSE
WC	DLBCL	rs1609303	FALSE	TRUE	FALSE	FALSE	FALSE	FALSE	FALSE	FALSE	FALSE	FALSE	FALSE
WC	DLBCL	rs1801282	FALSE	TRUE	FALSE	FALSE	FALSE	FALSE	FALSE	FALSE	FALSE	FALSE	FALSE
WC	DLBCL	rs2133561	FALSE	TRUE	FALSE	FALSE	FALSE	FALSE	FALSE	FALSE	FALSE	FALSE	FALSE
WC	DLBCL	rs2537621	FALSE	TRUE	FALSE	FALSE	FALSE	FALSE	FALSE	FALSE	FALSE	FALSE	FALSE
WC	DLBCL	rs2619770	FALSE	TRUE	FALSE	FALSE	FALSE	FALSE	FALSE	FALSE	FALSE	FALSE	FALSE
WC	DLBCL	rs2903738	FALSE	TRUE	FALSE	FALSE	FALSE	FALSE	FALSE	FALSE	FALSE	FALSE	FALSE
WC	DLBCL	rs2962466	FALSE	TRUE	FALSE	FALSE	FALSE	FALSE	FALSE	FALSE	FALSE	FALSE	FALSE
WC	DLBCL	rs35856604	FALSE	TRUE	FALSE	FALSE	FALSE	FALSE	FALSE	FALSE	FALSE	FALSE	FALSE
WC	DLBCL	rs4469245	FALSE	TRUE	FALSE	FALSE	FALSE	FALSE	FALSE	FALSE	FALSE	FALSE	FALSE
WC	DLBCL	rs4517716	FALSE	TRUE	FALSE	FALSE	FALSE	FALSE	FALSE	FALSE	FALSE	FALSE	FALSE
WC	DLBCL	rs4562625	FALSE	TRUE	FALSE	FALSE	FALSE	FALSE	FALSE	FALSE	FALSE	FALSE	FALSE
WC	DLBCL	rs4742782	FALSE	TRUE	FALSE	FALSE	FALSE	FALSE	FALSE	FALSE	FALSE	FALSE	FALSE
WC	DLBCL	rs4760820	FALSE	TRUE	FALSE	FALSE	FALSE	FALSE	FALSE	FALSE	FALSE	FALSE	FALSE
WC	DLBCL	rs4800191	FALSE	TRUE	FALSE	FALSE	FALSE	FALSE	FALSE	FALSE	FALSE	FALSE	FALSE
WC	DLBCL	rs4851283	FALSE	TRUE	FALSE	FALSE	FALSE	FALSE	FALSE	FALSE	FALSE	FALSE	FALSE
WC	DLBCL	rs55722386	FALSE	TRUE	FALSE	FALSE	FALSE	FALSE	FALSE	FALSE	FALSE	FALSE	FALSE
WC	DLBCL	rs649458	FALSE	TRUE	FALSE	FALSE	FALSE	FALSE	FALSE	FALSE	FALSE	FALSE	FALSE
WC	DLBCL	rs6753395	FALSE	TRUE	FALSE	FALSE	FALSE	FALSE	FALSE	FALSE	FALSE	FALSE	FALSE
WC	DLBCL	rs6846041	FALSE	TRUE	FALSE	FALSE	FALSE	FALSE	FALSE	FALSE	FALSE	FALSE	FALSE
WC	DLBCL	rs716955	FALSE	TRUE	FALSE	FALSE	FALSE	FALSE	FALSE	FALSE	FALSE	FALSE	FALSE
WC	DLBCL	rs7206608	FALSE	TRUE	FALSE	FALSE	FALSE	FALSE	FALSE	FALSE	FALSE	FALSE	FALSE
WC	DLBCL	rs72618637	FALSE	TRUE	FALSE	FALSE	FALSE	FALSE	FALSE	FALSE	FALSE	FALSE	FALSE
WC	DLBCL	rs7307203	FALSE	TRUE	FALSE	FALSE	FALSE	FALSE	FALSE	FALSE	FALSE	FALSE	FALSE
WC	DLBCL	rs7442885	FALSE	TRUE	FALSE	FALSE	FALSE	FALSE	FALSE	FALSE	FALSE	FALSE	FALSE
WC	DLBCL	rs746839	FALSE	TRUE	FALSE	FALSE	FALSE	FALSE	FALSE	FALSE	FALSE	FALSE	FALSE
WC	DLBCL	rs76357735	FALSE	TRUE	FALSE	FALSE	FALSE	FALSE	FALSE	FALSE	FALSE	FALSE	FALSE
WC	DLBCL	rs78719810	FALSE	TRUE	FALSE	FALSE	FALSE	FALSE	FALSE	FALSE	FALSE	FALSE	FALSE
WC	DLBCL	rs8024137	FALSE	TRUE	FALSE	FALSE	FALSE	FALSE	FALSE	FALSE	FALSE	FALSE	FALSE
WC	DLBCL	rs8097672	FALSE	TRUE	FALSE	FALSE	FALSE	FALSE	FALSE	FALSE	FALSE	FALSE	FALSE
WC	DLBCL	rs8106047	FALSE	TRUE	FALSE	FALSE	FALSE	FALSE	FALSE	FALSE	FALSE	FALSE	FALSE
WC	DLBCL	rs864789	FALSE	TRUE	FALSE	FALSE	FALSE	FALSE	FALSE	FALSE	FALSE	FALSE	FALSE
WC	DLBCL	rs900448	FALSE	TRUE	FALSE	FALSE	FALSE	FALSE	FALSE	FALSE	FALSE	FALSE	FALSE
WC	DLBCL	rs9289630	FALSE	TRUE	FALSE	FALSE	FALSE	FALSE	FALSE	FALSE	FALSE	FALSE	FALSE
WC	DLBCL	rs9364685	FALSE	TRUE	FALSE	FALSE	FALSE	FALSE	FALSE	FALSE	FALSE	FALSE	FALSE
WC	DLBCL	rs939375	FALSE	TRUE	FALSE	FALSE	FALSE	FALSE	FALSE	FALSE	FALSE	FALSE	FALSE
WC	DLBCL	rs945211	FALSE	TRUE	FALSE	FALSE	FALSE	FALSE	FALSE	FALSE	FALSE	FALSE	FALSE
WC	DLBCL	rs9916444	FALSE	TRUE	FALSE	FALSE	FALSE	FALSE	FALSE	FALSE	FALSE	FALSE	FALSE
WC	DLBCL	rs10269774	FALSE	FALSE	FALSE	FALSE	TRUE	FALSE	FALSE	FALSE	FALSE	FALSE	FALSE
WC	DLBCL	rs11205277	FALSE	FALSE	FALSE	FALSE	TRUE	FALSE	FALSE	FALSE	FALSE	FALSE	FALSE
WC	DLBCL	rs11205277	FALSE	FALSE	FALSE	FALSE	TRUE	FALSE	FALSE	FALSE	FALSE	FALSE	FALSE
WC	DLBCL	rs11205277	FALSE	FALSE	FALSE	FALSE	TRUE	FALSE	FALSE	FALSE	FALSE	FALSE	FALSE
WC	DLBCL	rs1183668	FALSE	FALSE	FALSE	FALSE	TRUE	FALSE	FALSE	FALSE	FALSE	FALSE	FALSE
WC	DLBCL	rs12042959	FALSE	FALSE	FALSE	FALSE	TRUE	FALSE	FALSE	FALSE	FALSE	FALSE	FALSE
WC	DLBCL	rs12463617	FALSE	FALSE	FALSE	FALSE	TRUE	FALSE	FALSE	FALSE	FALSE	FALSE	FALSE
WC	DLBCL	rs12463617	FALSE	FALSE	FALSE	FALSE	TRUE	FALSE	FALSE	FALSE	FALSE	FALSE	FALSE
WC	DLBCL	rs12463617	FALSE	FALSE	FALSE	FALSE	TRUE	FALSE	FALSE	FALSE	FALSE	FALSE	FALSE
WC	DLBCL	rs12463617	FALSE	FALSE	FALSE	FALSE	TRUE	FALSE	FALSE	FALSE	FALSE	FALSE	FALSE
WC	DLBCL	rs13420048	FALSE	FALSE	FALSE	FALSE	TRUE	FALSE	FALSE	FALSE	FALSE	FALSE	FALSE
WC	DLBCL	rs2568958	FALSE	FALSE	FALSE	FALSE	TRUE	FALSE	FALSE	FALSE	FALSE	FALSE	FALSE
WC	DLBCL	rs2568958	FALSE	FALSE	FALSE	FALSE	TRUE	FALSE	FALSE	FALSE	FALSE	FALSE	FALSE
WC	DLBCL	rs34517439	FALSE	FALSE	FALSE	FALSE	TRUE	FALSE	FALSE	FALSE	FALSE	FALSE	FALSE
WC	DLBCL	rs3845344	FALSE	FALSE	FALSE	FALSE	TRUE	FALSE	FALSE	FALSE	FALSE	FALSE	FALSE
WC	DLBCL	rs4290163	FALSE	FALSE	FALSE	FALSE	TRUE	FALSE	FALSE	FALSE	FALSE	FALSE	FALSE
WC	DLBCL	rs62261725	FALSE	FALSE	FALSE	FALSE	TRUE	FALSE	FALSE	FALSE	FALSE	FALSE	FALSE
WC	DLBCL	rs6567160	FALSE	FALSE	FALSE	FALSE	TRUE	FALSE	FALSE	FALSE	FALSE	FALSE	FALSE
WC	DLBCL	rs6567160	FALSE	FALSE	FALSE	FALSE	TRUE	FALSE	FALSE	FALSE	FALSE	FALSE	FALSE
WC	DLBCL	rs6567160	FALSE	FALSE	FALSE	FALSE	TRUE	FALSE	FALSE	FALSE	FALSE	FALSE	FALSE
WC	DLBCL	rs6567160	FALSE	FALSE	FALSE	FALSE	TRUE	FALSE	FALSE	FALSE	FALSE	FALSE	FALSE
WC	DLBCL	rs6567160	FALSE	FALSE	FALSE	FALSE	TRUE	FALSE	FALSE	FALSE	FALSE	FALSE	FALSE
WC	DLBCL	rs6567160	FALSE	FALSE	FALSE	FALSE	TRUE	FALSE	FALSE	FALSE	FALSE	FALSE	FALSE
WC	DLBCL	rs6567160	FALSE	FALSE	FALSE	FALSE	TRUE	FALSE	FALSE	FALSE	FALSE	FALSE	FALSE
WC	DLBCL	rs6682438	FALSE	FALSE	FALSE	FALSE	TRUE	FALSE	FALSE	FALSE	FALSE	FALSE	FALSE
WC	DLBCL	rs6938973	FALSE	FALSE	FALSE	FALSE	TRUE	FALSE	FALSE	FALSE	FALSE	FALSE	FALSE
WC	DLBCL	rs7132908	FALSE	FALSE	FALSE	FALSE	TRUE	FALSE	FALSE	FALSE	FALSE	FALSE	FALSE
WC	DLBCL	rs883403	FALSE	FALSE	FALSE	FALSE	TRUE	FALSE	FALSE	FALSE	FALSE	FALSE	FALSE
WC	DLBCL	rs9926784	FALSE	FALSE	FALSE	FALSE	TRUE	FALSE	FALSE	FALSE	FALSE	FALSE	FALSE
WC	DLBCL	rs9926784	FALSE	FALSE	FALSE	FALSE	TRUE	FALSE	FALSE	FALSE	FALSE	FALSE	FALSE
HC	DLBCL	rs10100245	FALSE	FALSE	FALSE	FALSE	TRUE	FALSE	FALSE	FALSE	FALSE	FALSE	FALSE
HC	DLBCL	rs1013402	FALSE	FALSE	FALSE	FALSE	TRUE	FALSE	FALSE	FALSE	FALSE	FALSE	FALSE
HC	DLBCL	rs1013402	FALSE	FALSE	FALSE	FALSE	TRUE	FALSE	FALSE	FALSE	FALSE	FALSE	FALSE
HC	DLBCL	rs10742752	FALSE	FALSE	FALSE	FALSE	TRUE	FALSE	FALSE	FALSE	FALSE	FALSE	FALSE
HC	DLBCL	rs10742752	FALSE	FALSE	FALSE	FALSE	TRUE	FALSE	FALSE	FALSE	FALSE	FALSE	FALSE
HC	DLBCL	rs10938397	FALSE	FALSE	FALSE	FALSE	TRUE	FALSE	FALSE	FALSE	FALSE	FALSE	FALSE
HC	DLBCL	rs10938397	FALSE	FALSE	FALSE	FALSE	TRUE	FALSE	FALSE	FALSE	FALSE	FALSE	FALSE
HC	DLBCL	rs10938397	FALSE	FALSE	FALSE	FALSE	TRUE	FALSE	FALSE	FALSE	FALSE	FALSE	FALSE
HC	DLBCL	rs10938397	FALSE	FALSE	FALSE	FALSE	TRUE	FALSE	FALSE	FALSE	FALSE	FALSE	FALSE
HC	DLBCL	rs10938397	FALSE	FALSE	FALSE	FALSE	TRUE	FALSE	FALSE	FALSE	FALSE	FALSE	FALSE
HC	DLBCL	rs11513729	FALSE	FALSE	FALSE	FALSE	TRUE	FALSE	FALSE	FALSE	FALSE	FALSE	FALSE
HC	DLBCL	rs13107325	FALSE	FALSE	FALSE	FALSE	TRUE	FALSE	FALSE	FALSE	FALSE	FALSE	FALSE
HC	DLBCL	rs13107325	FALSE	FALSE	FALSE	FALSE	TRUE	FALSE	FALSE	FALSE	FALSE	FALSE	FALSE
HC	DLBCL	rs1502317	FALSE	FALSE	FALSE	FALSE	TRUE	FALSE	FALSE	FALSE	FALSE	FALSE	FALSE
HC	DLBCL	rs16868443	FALSE	FALSE	FALSE	FALSE	TRUE	FALSE	FALSE	FALSE	FALSE	FALSE	FALSE
HC	DLBCL	rs2178385	FALSE	FALSE	FALSE	FALSE	TRUE	FALSE	FALSE	FALSE	FALSE	FALSE	FALSE
HC	DLBCL	rs2307111	FALSE	FALSE	FALSE	FALSE	TRUE	FALSE	FALSE	FALSE	FALSE	FALSE	FALSE
HC	DLBCL	rs2307111	FALSE	FALSE	FALSE	FALSE	TRUE	FALSE	FALSE	FALSE	FALSE	FALSE	FALSE
HC	DLBCL	rs2371767	FALSE	FALSE	FALSE	FALSE	TRUE	FALSE	FALSE	FALSE	FALSE	FALSE	FALSE
HC	DLBCL	rs2371767	FALSE	FALSE	FALSE	FALSE	TRUE	FALSE	FALSE	FALSE	FALSE	FALSE	FALSE
HC	DLBCL	rs2384054	FALSE	FALSE	FALSE	FALSE	TRUE	FALSE	FALSE	FALSE	FALSE	FALSE	FALSE
HC	DLBCL	rs2384054	FALSE	FALSE	FALSE	FALSE	TRUE	FALSE	FALSE	FALSE	FALSE	FALSE	FALSE
HC	DLBCL	rs2568958	FALSE	FALSE	FALSE	FALSE	TRUE	FALSE	FALSE	FALSE	FALSE	FALSE	FALSE
HC	DLBCL	rs2568958	FALSE	FALSE	FALSE	FALSE	TRUE	FALSE	FALSE	FALSE	FALSE	FALSE	FALSE
HC	DLBCL	rs2568958	FALSE	FALSE	FALSE	FALSE	TRUE	FALSE	FALSE	FALSE	FALSE	FALSE	FALSE
HC	DLBCL	rs2568958	FALSE	FALSE	FALSE	FALSE	TRUE	FALSE	FALSE	FALSE	FALSE	FALSE	FALSE
HC	DLBCL	rs28457808	FALSE	FALSE	FALSE	FALSE	TRUE	FALSE	FALSE	FALSE	FALSE	FALSE	FALSE
HC	DLBCL	rs34517439	FALSE	FALSE	FALSE	FALSE	TRUE	FALSE	FALSE	FALSE	FALSE	FALSE	FALSE
HC	DLBCL	rs3802849	FALSE	FALSE	FALSE	FALSE	TRUE	FALSE	FALSE	FALSE	FALSE	FALSE	FALSE
HC	DLBCL	rs3802849	FALSE	FALSE	FALSE	FALSE	TRUE	FALSE	FALSE	FALSE	FALSE	FALSE	FALSE
HC	DLBCL	rs3810291	FALSE	FALSE	FALSE	FALSE	TRUE	FALSE	FALSE	FALSE	FALSE	FALSE	FALSE
HC	DLBCL	rs3810291	FALSE	FALSE	FALSE	FALSE	TRUE	FALSE	FALSE	FALSE	FALSE	FALSE	FALSE
HC	DLBCL	rs3810291	FALSE	FALSE	FALSE	FALSE	TRUE	FALSE	FALSE	FALSE	FALSE	FALSE	FALSE
HC	DLBCL	rs3810291	FALSE	FALSE	FALSE	FALSE	TRUE	FALSE	FALSE	FALSE	FALSE	FALSE	FALSE
HC	DLBCL	rs3810291	FALSE	FALSE	FALSE	FALSE	TRUE	FALSE	FALSE	FALSE	FALSE	FALSE	FALSE
HC	DLBCL	rs3810291	FALSE	FALSE	FALSE	FALSE	TRUE	FALSE	FALSE	FALSE	FALSE	FALSE	FALSE
HC	DLBCL	rs3810291	FALSE	FALSE	FALSE	FALSE	TRUE	FALSE	FALSE	FALSE	FALSE	FALSE	FALSE
HC	DLBCL	rs3814883	FALSE	FALSE	FALSE	FALSE	TRUE	FALSE	FALSE	FALSE	FALSE	FALSE	FALSE
HC	DLBCL	rs3814883	FALSE	FALSE	FALSE	FALSE	TRUE	FALSE	FALSE	FALSE	FALSE	FALSE	FALSE
HC	DLBCL	rs4477562	FALSE	FALSE	FALSE	FALSE	TRUE	FALSE	FALSE	FALSE	FALSE	FALSE	FALSE
HC	DLBCL	rs4477562	FALSE	FALSE	FALSE	FALSE	TRUE	FALSE	FALSE	FALSE	FALSE	FALSE	FALSE
HC	DLBCL	rs543874	FALSE	FALSE	FALSE	FALSE	TRUE	FALSE	FALSE	FALSE	FALSE	FALSE	FALSE
HC	DLBCL	rs543874	FALSE	FALSE	FALSE	FALSE	TRUE	FALSE	FALSE	FALSE	FALSE	FALSE	FALSE
HC	DLBCL	rs543874	FALSE	FALSE	FALSE	FALSE	TRUE	FALSE	FALSE	FALSE	FALSE	FALSE	FALSE
HC	DLBCL	rs543874	FALSE	FALSE	FALSE	FALSE	TRUE	FALSE	FALSE	FALSE	FALSE	FALSE	FALSE
HC	DLBCL	rs543874	FALSE	FALSE	FALSE	FALSE	TRUE	FALSE	FALSE	FALSE	FALSE	FALSE	FALSE
HC	DLBCL	rs543874	FALSE	FALSE	FALSE	FALSE	TRUE	FALSE	FALSE	FALSE	FALSE	FALSE	FALSE
HC	DLBCL	rs543874	FALSE	FALSE	FALSE	FALSE	TRUE	FALSE	FALSE	FALSE	FALSE	FALSE	FALSE
HC	DLBCL	rs62396185	FALSE	FALSE	FALSE	FALSE	TRUE	FALSE	FALSE	FALSE	FALSE	FALSE	FALSE
HC	DLBCL	rs62396185	FALSE	FALSE	FALSE	FALSE	TRUE	FALSE	FALSE	FALSE	FALSE	FALSE	FALSE
HC	DLBCL	rs6567160	FALSE	FALSE	FALSE	FALSE	TRUE	FALSE	FALSE	FALSE	FALSE	FALSE	FALSE
HC	DLBCL	rs6567160	FALSE	FALSE	FALSE	FALSE	TRUE	FALSE	FALSE	FALSE	FALSE	FALSE	FALSE
HC	DLBCL	rs6567160	FALSE	FALSE	FALSE	FALSE	TRUE	FALSE	FALSE	FALSE	FALSE	FALSE	FALSE
HC	DLBCL	rs6567160	FALSE	FALSE	FALSE	FALSE	TRUE	FALSE	FALSE	FALSE	FALSE	FALSE	FALSE
HC	DLBCL	rs6567160	FALSE	FALSE	FALSE	FALSE	TRUE	FALSE	FALSE	FALSE	FALSE	FALSE	FALSE
HC	DLBCL	rs6567160	FALSE	FALSE	FALSE	FALSE	TRUE	FALSE	FALSE	FALSE	FALSE	FALSE	FALSE
HC	DLBCL	rs6567160	FALSE	FALSE	FALSE	FALSE	TRUE	FALSE	FALSE	FALSE	FALSE	FALSE	FALSE
HC	DLBCL	rs6567160	FALSE	FALSE	FALSE	FALSE	TRUE	FALSE	FALSE	FALSE	FALSE	FALSE	FALSE
HC	DLBCL	rs6567160	FALSE	FALSE	FALSE	FALSE	TRUE	FALSE	FALSE	FALSE	FALSE	FALSE	FALSE
HC	DLBCL	rs6669189	FALSE	FALSE	FALSE	FALSE	TRUE	FALSE	FALSE	FALSE	FALSE	FALSE	FALSE
HC	DLBCL	rs6669189	FALSE	FALSE	FALSE	FALSE	TRUE	FALSE	FALSE	FALSE	FALSE	FALSE	FALSE
HC	DLBCL	rs6744646	FALSE	FALSE	FALSE	FALSE	TRUE	FALSE	FALSE	FALSE	FALSE	FALSE	FALSE
HC	DLBCL	rs6744646	FALSE	FALSE	FALSE	FALSE	TRUE	FALSE	FALSE	FALSE	FALSE	FALSE	FALSE
HC	DLBCL	rs6744646	FALSE	FALSE	FALSE	FALSE	TRUE	FALSE	FALSE	FALSE	FALSE	FALSE	FALSE
HC	DLBCL	rs6744646	FALSE	FALSE	FALSE	FALSE	TRUE	FALSE	FALSE	FALSE	FALSE	FALSE	FALSE
HC	DLBCL	rs6744646	FALSE	FALSE	FALSE	FALSE	TRUE	FALSE	FALSE	FALSE	FALSE	FALSE	FALSE
HC	DLBCL	rs6744646	FALSE	FALSE	FALSE	FALSE	TRUE	FALSE	FALSE	FALSE	FALSE	FALSE	FALSE
HC	DLBCL	rs7124681	FALSE	FALSE	FALSE	FALSE	TRUE	FALSE	FALSE	FALSE	FALSE	FALSE	FALSE
HC	DLBCL	rs7124681	FALSE	FALSE	FALSE	FALSE	TRUE	FALSE	FALSE	FALSE	FALSE	FALSE	FALSE
HC	DLBCL	rs7132908	FALSE	FALSE	FALSE	FALSE	TRUE	FALSE	FALSE	FALSE	FALSE	FALSE	FALSE
HC	DLBCL	rs7132908	FALSE	FALSE	FALSE	FALSE	TRUE	FALSE	FALSE	FALSE	FALSE	FALSE	FALSE
HC	DLBCL	rs7132908	FALSE	FALSE	FALSE	FALSE	TRUE	FALSE	FALSE	FALSE	FALSE	FALSE	FALSE
HC	DLBCL	rs743572	FALSE	FALSE	FALSE	FALSE	TRUE	FALSE	FALSE	FALSE	FALSE	FALSE	FALSE
HC	DLBCL	rs7498665	FALSE	FALSE	FALSE	FALSE	TRUE	FALSE	FALSE	FALSE	FALSE	FALSE	FALSE
HC	DLBCL	rs7498665	FALSE	FALSE	FALSE	FALSE	TRUE	FALSE	FALSE	FALSE	FALSE	FALSE	FALSE
HC	DLBCL	rs754635	FALSE	FALSE	FALSE	FALSE	TRUE	FALSE	FALSE	FALSE	FALSE	FALSE	FALSE
HC	DLBCL	rs7632381	FALSE	FALSE	FALSE	FALSE	TRUE	FALSE	FALSE	FALSE	FALSE	FALSE	FALSE
HC	DLBCL	rs7632381	FALSE	FALSE	FALSE	FALSE	TRUE	FALSE	FALSE	FALSE	FALSE	FALSE	FALSE
HC	DLBCL	rs7903146	FALSE	FALSE	FALSE	FALSE	TRUE	FALSE	FALSE	FALSE	FALSE	FALSE	FALSE
HC	DLBCL	rs7903146	FALSE	FALSE	FALSE	FALSE	TRUE	FALSE	FALSE	FALSE	FALSE	FALSE	FALSE
HC	DLBCL	rs8030456	FALSE	FALSE	FALSE	FALSE	TRUE	FALSE	FALSE	FALSE	FALSE	FALSE	FALSE
HC	DLBCL	rs8030456	FALSE	FALSE	FALSE	FALSE	TRUE	FALSE	FALSE	FALSE	FALSE	FALSE	FALSE
HC	DLBCL	rs897186	FALSE	FALSE	FALSE	FALSE	TRUE	FALSE	FALSE	FALSE	FALSE	FALSE	FALSE
HC	DLBCL	rs987237	FALSE	FALSE	FALSE	FALSE	TRUE	FALSE	FALSE	FALSE	FALSE	FALSE	FALSE
HC	DLBCL	rs987237	FALSE	FALSE	FALSE	FALSE	TRUE	FALSE	FALSE	FALSE	FALSE	FALSE	FALSE
HC	DLBCL	rs987237	FALSE	FALSE	FALSE	FALSE	TRUE	FALSE	FALSE	FALSE	FALSE	FALSE	FALSE
HC	DLBCL	rs987237	FALSE	FALSE	FALSE	FALSE	TRUE	FALSE	FALSE	FALSE	FALSE	FALSE	FALSE
HC	DLBCL	rs987237	FALSE	FALSE	FALSE	FALSE	TRUE	FALSE	FALSE	FALSE	FALSE	FALSE	FALSE
HC	DLBCL	rs9876664	FALSE	FALSE	FALSE	FALSE	TRUE	FALSE	FALSE	FALSE	FALSE	FALSE	FALSE
HC	DLBCL	rs9876664	FALSE	FALSE	FALSE	FALSE	TRUE	FALSE	FALSE	FALSE	FALSE	FALSE	FALSE
HC	DLBCL	rs998584	FALSE	FALSE	FALSE	FALSE	TRUE	FALSE	FALSE	FALSE	FALSE	FALSE	FALSE
HC	DLBCL	rs998584	FALSE	TRUE	FALSE	FALSE	FALSE	FALSE	FALSE	FALSE	FALSE	FALSE	FALSE
HC	DLBCL	rs1005887	FALSE	TRUE	FALSE	FALSE	FALSE	FALSE	FALSE	FALSE	FALSE	FALSE	FALSE
HC	DLBCL	rs10158176	FALSE	TRUE	FALSE	FALSE	FALSE	FALSE	FALSE	FALSE	FALSE	FALSE	FALSE
HC	DLBCL	rs10245306	FALSE	TRUE	FALSE	FALSE	FALSE	FALSE	FALSE	FALSE	FALSE	FALSE	FALSE
HC	DLBCL	rs10738673	FALSE	TRUE	FALSE	FALSE	FALSE	FALSE	FALSE	FALSE	FALSE	FALSE	FALSE
HC	DLBCL	rs10810598	FALSE	TRUE	FALSE	FALSE	FALSE	FALSE	FALSE	FALSE	FALSE	FALSE	FALSE
HC	DLBCL	rs11150461	FALSE	TRUE	FALSE	FALSE	FALSE	FALSE	FALSE	FALSE	FALSE	FALSE	FALSE
HC	DLBCL	rs11664106	FALSE	TRUE	FALSE	FALSE	FALSE	FALSE	FALSE	FALSE	FALSE	FALSE	FALSE
HC	DLBCL	rs117176448	FALSE	TRUE	FALSE	FALSE	FALSE	FALSE	FALSE	FALSE	FALSE	FALSE	FALSE
HC	DLBCL	rs11755542	FALSE	TRUE	FALSE	FALSE	FALSE	FALSE	FALSE	FALSE	FALSE	FALSE	FALSE
HC	DLBCL	rs12494537	FALSE	TRUE	FALSE	FALSE	FALSE	FALSE	FALSE	FALSE	FALSE	FALSE	FALSE
HC	DLBCL	rs13171526	FALSE	TRUE	FALSE	FALSE	FALSE	FALSE	FALSE	FALSE	FALSE	FALSE	FALSE
HC	DLBCL	rs148636479	FALSE	TRUE	FALSE	FALSE	FALSE	FALSE	FALSE	FALSE	FALSE	FALSE	FALSE
HC	DLBCL	rs16868443	FALSE	TRUE	FALSE	FALSE	FALSE	FALSE	FALSE	FALSE	FALSE	FALSE	FALSE
HC	DLBCL	rs16996277	FALSE	TRUE	FALSE	FALSE	FALSE	FALSE	FALSE	FALSE	FALSE	FALSE	FALSE
HC	DLBCL	rs171836	FALSE	TRUE	FALSE	FALSE	FALSE	FALSE	FALSE	FALSE	FALSE	FALSE	FALSE
HC	DLBCL	rs17446299	FALSE	TRUE	FALSE	FALSE	FALSE	FALSE	FALSE	FALSE	FALSE	FALSE	FALSE
HC	DLBCL	rs1801282	FALSE	TRUE	FALSE	FALSE	FALSE	FALSE	FALSE	FALSE	FALSE	FALSE	FALSE
HC	DLBCL	rs1934394	FALSE	TRUE	FALSE	FALSE	FALSE	FALSE	FALSE	FALSE	FALSE	FALSE	FALSE
HC	DLBCL	rs2133561	FALSE	TRUE	FALSE	FALSE	FALSE	FALSE	FALSE	FALSE	FALSE	FALSE	FALSE
HC	DLBCL	rs2270894	FALSE	TRUE	FALSE	FALSE	FALSE	FALSE	FALSE	FALSE	FALSE	FALSE	FALSE
HC	DLBCL	rs2292839	FALSE	TRUE	FALSE	FALSE	FALSE	FALSE	FALSE	FALSE	FALSE	FALSE	FALSE
HC	DLBCL	rs2371767	FALSE	TRUE	FALSE	FALSE	FALSE	FALSE	FALSE	FALSE	FALSE	FALSE	FALSE
HC	DLBCL	rs2579040	FALSE	TRUE	FALSE	FALSE	FALSE	FALSE	FALSE	FALSE	FALSE	FALSE	FALSE
HC	DLBCL	rs25849	FALSE	TRUE	FALSE	FALSE	FALSE	FALSE	FALSE	FALSE	FALSE	FALSE	FALSE
HC	DLBCL	rs28457808	FALSE	TRUE	FALSE	FALSE	FALSE	FALSE	FALSE	FALSE	FALSE	FALSE	FALSE
HC	DLBCL	rs35136	FALSE	TRUE	FALSE	FALSE	FALSE	FALSE	FALSE	FALSE	FALSE	FALSE	FALSE
HC	DLBCL	rs35792595	FALSE	TRUE	FALSE	FALSE	FALSE	FALSE	FALSE	FALSE	FALSE	FALSE	FALSE
HC	DLBCL	rs35910339	FALSE	TRUE	FALSE	FALSE	FALSE	FALSE	FALSE	FALSE	FALSE	FALSE	FALSE
HC	DLBCL	rs3729793	FALSE	TRUE	FALSE	FALSE	FALSE	FALSE	FALSE	FALSE	FALSE	FALSE	FALSE
HC	DLBCL	rs3802849	FALSE	TRUE	FALSE	FALSE	FALSE	FALSE	FALSE	FALSE	FALSE	FALSE	FALSE
HC	DLBCL	rs4517716	FALSE	TRUE	FALSE	FALSE	FALSE	FALSE	FALSE	FALSE	FALSE	FALSE	FALSE
HC	DLBCL	rs4665911	FALSE	TRUE	FALSE	FALSE	FALSE	FALSE	FALSE	FALSE	FALSE	FALSE	FALSE
HC	DLBCL	rs4820346	FALSE	TRUE	FALSE	FALSE	FALSE	FALSE	FALSE	FALSE	FALSE	FALSE	FALSE
HC	DLBCL	rs4843158	FALSE	TRUE	FALSE	FALSE	FALSE	FALSE	FALSE	FALSE	FALSE	FALSE	FALSE
HC	DLBCL	rs4897174	FALSE	TRUE	FALSE	FALSE	FALSE	FALSE	FALSE	FALSE	FALSE	FALSE	FALSE
HC	DLBCL	rs4962424	FALSE	TRUE	FALSE	FALSE	FALSE	FALSE	FALSE	FALSE	FALSE	FALSE	FALSE
HC	DLBCL	rs57222629	FALSE	TRUE	FALSE	FALSE	FALSE	FALSE	FALSE	FALSE	FALSE	FALSE	FALSE
HC	DLBCL	rs61898343	FALSE	TRUE	FALSE	FALSE	FALSE	FALSE	FALSE	FALSE	FALSE	FALSE	FALSE
HC	DLBCL	rs62166769	FALSE	TRUE	FALSE	FALSE	FALSE	FALSE	FALSE	FALSE	FALSE	FALSE	FALSE
HC	DLBCL	rs62376595	FALSE	TRUE	FALSE	FALSE	FALSE	FALSE	FALSE	FALSE	FALSE	FALSE	FALSE
HC	DLBCL	rs62396185	FALSE	TRUE	FALSE	FALSE	FALSE	FALSE	FALSE	FALSE	FALSE	FALSE	FALSE
HC	DLBCL	rs6463333	FALSE	TRUE	FALSE	FALSE	FALSE	FALSE	FALSE	FALSE	FALSE	FALSE	FALSE
HC	DLBCL	rs6606686	FALSE	TRUE	FALSE	FALSE	FALSE	FALSE	FALSE	FALSE	FALSE	FALSE	FALSE
HC	DLBCL	rs667515	FALSE	TRUE	FALSE	FALSE	FALSE	FALSE	FALSE	FALSE	FALSE	FALSE	FALSE
HC	DLBCL	rs6696828	FALSE	TRUE	FALSE	FALSE	FALSE	FALSE	FALSE	FALSE	FALSE	FALSE	FALSE
HC	DLBCL	rs6984417	FALSE	TRUE	FALSE	FALSE	FALSE	FALSE	FALSE	FALSE	FALSE	FALSE	FALSE
HC	DLBCL	rs7087701	FALSE	TRUE	FALSE	FALSE	FALSE	FALSE	FALSE	FALSE	FALSE	FALSE	FALSE
HC	DLBCL	rs72618637	FALSE	TRUE	FALSE	FALSE	FALSE	FALSE	FALSE	FALSE	FALSE	FALSE	FALSE
HC	DLBCL	rs7262211	FALSE	TRUE	FALSE	FALSE	FALSE	FALSE	FALSE	FALSE	FALSE	FALSE	FALSE
HC	DLBCL	rs73196750	FALSE	TRUE	FALSE	FALSE	FALSE	FALSE	FALSE	FALSE	FALSE	FALSE	FALSE
HC	DLBCL	rs73213484	FALSE	TRUE	FALSE	FALSE	FALSE	FALSE	FALSE	FALSE	FALSE	FALSE	FALSE
HC	DLBCL	rs7442885	FALSE	TRUE	FALSE	FALSE	FALSE	FALSE	FALSE	FALSE	FALSE	FALSE	FALSE
HC	DLBCL	rs754635	FALSE	TRUE	FALSE	FALSE	FALSE	FALSE	FALSE	FALSE	FALSE	FALSE	FALSE
HC	DLBCL	rs7740107	FALSE	TRUE	FALSE	FALSE	FALSE	FALSE	FALSE	FALSE	FALSE	FALSE	FALSE
HC	DLBCL	rs779655	FALSE	TRUE	FALSE	FALSE	FALSE	FALSE	FALSE	FALSE	FALSE	FALSE	FALSE
HC	DLBCL	rs78470967	FALSE	TRUE	FALSE	FALSE	FALSE	FALSE	FALSE	FALSE	FALSE	FALSE	FALSE
HC	DLBCL	rs9788550	FALSE	TRUE	FALSE	FALSE	FALSE	FALSE	FALSE	FALSE	FALSE	FALSE	FALSE
HC	DLBCL	rs9845755	FALSE	TRUE	FALSE	FALSE	FALSE	FALSE	FALSE	FALSE	FALSE	FALSE	FALSE
SH	DLBCL	rs10061757	FALSE	TRUE	FALSE	FALSE	FALSE	FALSE	FALSE	FALSE	FALSE	FALSE	FALSE
SH	DLBCL	rs10207736	FALSE	TRUE	FALSE	FALSE	FALSE	FALSE	FALSE	FALSE	FALSE	FALSE	FALSE
SH	DLBCL	rs1043413	FALSE	TRUE	FALSE	FALSE	FALSE	FALSE	FALSE	FALSE	FALSE	FALSE	FALSE
SH	DLBCL	rs10498672	FALSE	TRUE	FALSE	FALSE	FALSE	FALSE	FALSE	FALSE	FALSE	FALSE	FALSE
SH	DLBCL	rs1074683	FALSE	TRUE	FALSE	FALSE	FALSE	FALSE	FALSE	FALSE	FALSE	FALSE	FALSE
SH	DLBCL	rs10832961	FALSE	TRUE	FALSE	FALSE	FALSE	FALSE	FALSE	FALSE	FALSE	FALSE	FALSE
SH	DLBCL	rs10943915	FALSE	TRUE	FALSE	FALSE	FALSE	FALSE	FALSE	FALSE	FALSE	FALSE	FALSE
SH	DLBCL	rs11122824	FALSE	TRUE	FALSE	FALSE	FALSE	FALSE	FALSE	FALSE	FALSE	FALSE	FALSE
SH	DLBCL	rs11144782	FALSE	TRUE	FALSE	FALSE	FALSE	FALSE	FALSE	FALSE	FALSE	FALSE	FALSE
SH	DLBCL	rs11708810	FALSE	TRUE	FALSE	FALSE	FALSE	FALSE	FALSE	FALSE	FALSE	FALSE	FALSE
SH	DLBCL	rs11947952	FALSE	TRUE	FALSE	FALSE	FALSE	FALSE	FALSE	FALSE	FALSE	FALSE	FALSE
SH	DLBCL	rs12055151	FALSE	TRUE	FALSE	FALSE	FALSE	FALSE	FALSE	FALSE	FALSE	FALSE	FALSE
SH	DLBCL	rs12132534	FALSE	TRUE	FALSE	FALSE	FALSE	FALSE	FALSE	FALSE	FALSE	FALSE	FALSE
SH	DLBCL	rs12185993	FALSE	TRUE	FALSE	FALSE	FALSE	FALSE	FALSE	FALSE	FALSE	FALSE	FALSE
SH	DLBCL	rs12452505	FALSE	TRUE	FALSE	FALSE	FALSE	FALSE	FALSE	FALSE	FALSE	FALSE	FALSE
SH	DLBCL	rs12459155	FALSE	TRUE	FALSE	FALSE	FALSE	FALSE	FALSE	FALSE	FALSE	FALSE	FALSE
SH	DLBCL	rs12668269	FALSE	TRUE	FALSE	FALSE	FALSE	FALSE	FALSE	FALSE	FALSE	FALSE	FALSE
SH	DLBCL	rs1291066	FALSE	TRUE	FALSE	FALSE	FALSE	FALSE	FALSE	FALSE	FALSE	FALSE	FALSE
SH	DLBCL	rs13406427	FALSE	TRUE	FALSE	FALSE	FALSE	FALSE	FALSE	FALSE	FALSE	FALSE	FALSE
SH	DLBCL	rs1353778	FALSE	TRUE	FALSE	FALSE	FALSE	FALSE	FALSE	FALSE	FALSE	FALSE	FALSE
SH	DLBCL	rs1420150	FALSE	TRUE	FALSE	FALSE	FALSE	FALSE	FALSE	FALSE	FALSE	FALSE	FALSE
SH	DLBCL	rs149802978	FALSE	TRUE	FALSE	FALSE	FALSE	FALSE	FALSE	FALSE	FALSE	FALSE	FALSE
SH	DLBCL	rs1573891	FALSE	TRUE	FALSE	FALSE	FALSE	FALSE	FALSE	FALSE	FALSE	FALSE	FALSE
SH	DLBCL	rs17454369	FALSE	TRUE	FALSE	FALSE	FALSE	FALSE	FALSE	FALSE	FALSE	FALSE	FALSE
SH	DLBCL	rs17511102	FALSE	TRUE	FALSE	FALSE	FALSE	FALSE	FALSE	FALSE	FALSE	FALSE	FALSE
SH	DLBCL	rs17855988	FALSE	TRUE	FALSE	FALSE	FALSE	FALSE	FALSE	FALSE	FALSE	FALSE	FALSE
SH	DLBCL	rs184090834	FALSE	TRUE	FALSE	FALSE	FALSE	FALSE	FALSE	FALSE	FALSE	FALSE	FALSE
SH	DLBCL	rs1867780	FALSE	TRUE	FALSE	FALSE	FALSE	FALSE	FALSE	FALSE	FALSE	FALSE	FALSE
SH	DLBCL	rs2006122	FALSE	TRUE	FALSE	FALSE	FALSE	FALSE	FALSE	FALSE	FALSE	FALSE	FALSE
SH	DLBCL	rs2138628	FALSE	TRUE	FALSE	FALSE	FALSE	FALSE	FALSE	FALSE	FALSE	FALSE	FALSE
SH	DLBCL	rs219162	FALSE	TRUE	FALSE	FALSE	FALSE	FALSE	FALSE	FALSE	FALSE	FALSE	FALSE
SH	DLBCL	rs2270894	FALSE	TRUE	FALSE	FALSE	FALSE	FALSE	FALSE	FALSE	FALSE	FALSE	FALSE
SH	DLBCL	rs227745	FALSE	TRUE	FALSE	FALSE	FALSE	FALSE	FALSE	FALSE	FALSE	FALSE	FALSE
SH	DLBCL	rs2410728	FALSE	TRUE	FALSE	FALSE	FALSE	FALSE	FALSE	FALSE	FALSE	FALSE	FALSE
SH	DLBCL	rs2648725	FALSE	TRUE	FALSE	FALSE	FALSE	FALSE	FALSE	FALSE	FALSE	FALSE	FALSE
SH	DLBCL	rs2663335	FALSE	TRUE	FALSE	FALSE	FALSE	FALSE	FALSE	FALSE	FALSE	FALSE	FALSE
SH	DLBCL	rs2763263	FALSE	TRUE	FALSE	FALSE	FALSE	FALSE	FALSE	FALSE	FALSE	FALSE	FALSE
SH	DLBCL	rs2793007	FALSE	TRUE	FALSE	FALSE	FALSE	FALSE	FALSE	FALSE	FALSE	FALSE	FALSE
SH	DLBCL	rs28503877	FALSE	TRUE	FALSE	FALSE	FALSE	FALSE	FALSE	FALSE	FALSE	FALSE	FALSE
SH	DLBCL	rs28625289	FALSE	TRUE	FALSE	FALSE	FALSE	FALSE	FALSE	FALSE	FALSE	FALSE	FALSE
SH	DLBCL	rs34587452	FALSE	TRUE	FALSE	FALSE	FALSE	FALSE	FALSE	FALSE	FALSE	FALSE	FALSE
SH	DLBCL	rs34970912	FALSE	TRUE	FALSE	FALSE	FALSE	FALSE	FALSE	FALSE	FALSE	FALSE	FALSE
SH	DLBCL	rs35990522	FALSE	TRUE	FALSE	FALSE	FALSE	FALSE	FALSE	FALSE	FALSE	FALSE	FALSE
SH	DLBCL	rs3866205	FALSE	TRUE	FALSE	FALSE	FALSE	FALSE	FALSE	FALSE	FALSE	FALSE	FALSE
SH	DLBCL	rs4510865	FALSE	TRUE	FALSE	FALSE	FALSE	FALSE	FALSE	FALSE	FALSE	FALSE	FALSE
SH	DLBCL	rs4723399	FALSE	TRUE	FALSE	FALSE	FALSE	FALSE	FALSE	FALSE	FALSE	FALSE	FALSE
SH	DLBCL	rs4865956	FALSE	TRUE	FALSE	FALSE	FALSE	FALSE	FALSE	FALSE	FALSE	FALSE	FALSE
SH	DLBCL	rs4870941	FALSE	TRUE	FALSE	FALSE	FALSE	FALSE	FALSE	FALSE	FALSE	FALSE	FALSE
SH	DLBCL	rs4938330	FALSE	TRUE	FALSE	FALSE	FALSE	FALSE	FALSE	FALSE	FALSE	FALSE	FALSE
SH	DLBCL	rs4969471	FALSE	TRUE	FALSE	FALSE	FALSE	FALSE	FALSE	FALSE	FALSE	FALSE	FALSE
SH	DLBCL	rs519384	FALSE	TRUE	FALSE	FALSE	FALSE	FALSE	FALSE	FALSE	FALSE	FALSE	FALSE
SH	DLBCL	rs55837722	FALSE	TRUE	FALSE	FALSE	FALSE	FALSE	FALSE	FALSE	FALSE	FALSE	FALSE
SH	DLBCL	rs56128104	FALSE	TRUE	FALSE	FALSE	FALSE	FALSE	FALSE	FALSE	FALSE	FALSE	FALSE
SH	DLBCL	rs578475	FALSE	TRUE	FALSE	FALSE	FALSE	FALSE	FALSE	FALSE	FALSE	FALSE	FALSE
SH	DLBCL	rs610798	FALSE	TRUE	FALSE	FALSE	FALSE	FALSE	FALSE	FALSE	FALSE	FALSE	FALSE
SH	DLBCL	rs61919240	FALSE	TRUE	FALSE	FALSE	FALSE	FALSE	FALSE	FALSE	FALSE	FALSE	FALSE
SH	DLBCL	rs62010237	FALSE	TRUE	FALSE	FALSE	FALSE	FALSE	FALSE	FALSE	FALSE	FALSE	FALSE
SH	DLBCL	rs62277396	FALSE	TRUE	FALSE	FALSE	FALSE	FALSE	FALSE	FALSE	FALSE	FALSE	FALSE
SH	DLBCL	rs62358929	FALSE	TRUE	FALSE	FALSE	FALSE	FALSE	FALSE	FALSE	FALSE	FALSE	FALSE
SH	DLBCL	rs62390617	FALSE	TRUE	FALSE	FALSE	FALSE	FALSE	FALSE	FALSE	FALSE	FALSE	FALSE
SH	DLBCL	rs66461782	FALSE	TRUE	FALSE	FALSE	FALSE	FALSE	FALSE	FALSE	FALSE	FALSE	FALSE
SH	DLBCL	rs67012296	FALSE	TRUE	FALSE	FALSE	FALSE	FALSE	FALSE	FALSE	FALSE	FALSE	FALSE
SH	DLBCL	rs6824592	FALSE	TRUE	FALSE	FALSE	FALSE	FALSE	FALSE	FALSE	FALSE	FALSE	FALSE
SH	DLBCL	rs6938592	FALSE	TRUE	FALSE	FALSE	FALSE	FALSE	FALSE	FALSE	FALSE	FALSE	FALSE
SH	DLBCL	rs6981529	FALSE	TRUE	FALSE	FALSE	FALSE	FALSE	FALSE	FALSE	FALSE	FALSE	FALSE
SH	DLBCL	rs703998	FALSE	TRUE	FALSE	FALSE	FALSE	FALSE	FALSE	FALSE	FALSE	FALSE	FALSE
SH	DLBCL	rs7071655	FALSE	TRUE	FALSE	FALSE	FALSE	FALSE	FALSE	FALSE	FALSE	FALSE	FALSE
SH	DLBCL	rs709631	FALSE	TRUE	FALSE	FALSE	FALSE	FALSE	FALSE	FALSE	FALSE	FALSE	FALSE
SH	DLBCL	rs7239515	FALSE	TRUE	FALSE	FALSE	FALSE	FALSE	FALSE	FALSE	FALSE	FALSE	FALSE
SH	DLBCL	rs72759895	FALSE	TRUE	FALSE	FALSE	FALSE	FALSE	FALSE	FALSE	FALSE	FALSE	FALSE
SH	DLBCL	rs72887152	FALSE	TRUE	FALSE	FALSE	FALSE	FALSE	FALSE	FALSE	FALSE	FALSE	FALSE
SH	DLBCL	rs73074166	FALSE	TRUE	FALSE	FALSE	FALSE	FALSE	FALSE	FALSE	FALSE	FALSE	FALSE
SH	DLBCL	rs734764	FALSE	TRUE	FALSE	FALSE	FALSE	FALSE	FALSE	FALSE	FALSE	FALSE	FALSE
SH	DLBCL	rs7469817	FALSE	TRUE	FALSE	FALSE	FALSE	FALSE	FALSE	FALSE	FALSE	FALSE	FALSE
SH	DLBCL	rs7627625	FALSE	TRUE	FALSE	FALSE	FALSE	FALSE	FALSE	FALSE	FALSE	FALSE	FALSE
SH	DLBCL	rs76887969	FALSE	TRUE	FALSE	FALSE	FALSE	FALSE	FALSE	FALSE	FALSE	FALSE	FALSE
SH	DLBCL	rs77672559	FALSE	TRUE	FALSE	FALSE	FALSE	FALSE	FALSE	FALSE	FALSE	FALSE	FALSE
SH	DLBCL	rs79621178	FALSE	TRUE	FALSE	FALSE	FALSE	FALSE	FALSE	FALSE	FALSE	FALSE	FALSE
SH	DLBCL	rs8033211	FALSE	TRUE	FALSE	FALSE	FALSE	FALSE	FALSE	FALSE	FALSE	FALSE	FALSE
SH	DLBCL	rs822530	FALSE	TRUE	FALSE	FALSE	FALSE	FALSE	FALSE	FALSE	FALSE	FALSE	FALSE
SH	DLBCL	rs9442571	FALSE	TRUE	FALSE	FALSE	FALSE	FALSE	FALSE	FALSE	FALSE	FALSE	FALSE
SH	DLBCL	rs9574556	FALSE	TRUE	FALSE	FALSE	FALSE	FALSE	FALSE	FALSE	FALSE	FALSE	FALSE
SH	DLBCL	rs9576134	FALSE	TRUE	FALSE	FALSE	FALSE	FALSE	FALSE	FALSE	FALSE	FALSE	FALSE
SH	DLBCL	rs34517439	FALSE	FALSE	FALSE	FALSE	TRUE	FALSE	FALSE	FALSE	FALSE	FALSE	FALSE
SH	DLBCL	rs4239436	FALSE	FALSE	FALSE	FALSE	TRUE	FALSE	FALSE	FALSE	FALSE	FALSE	FALSE
SH	DLBCL	rs4239436	FALSE	FALSE	FALSE	FALSE	TRUE	FALSE	FALSE	FALSE	FALSE	FALSE	FALSE
SH	DLBCL	rs4239436	FALSE	FALSE	FALSE	FALSE	TRUE	FALSE	FALSE	FALSE	FALSE	FALSE	FALSE
SH	DLBCL	rs4886782	FALSE	FALSE	FALSE	FALSE	TRUE	FALSE	FALSE	FALSE	FALSE	FALSE	FALSE
SH	DLBCL	rs4886782	FALSE	FALSE	FALSE	FALSE	TRUE	FALSE	FALSE	FALSE	FALSE	FALSE	FALSE
SH	DLBCL	rs62396185	FALSE	FALSE	FALSE	FALSE	TRUE	FALSE	FALSE	FALSE	FALSE	FALSE	FALSE
SH	DLBCL	rs62396185	FALSE	FALSE	FALSE	FALSE	TRUE	FALSE	FALSE	FALSE	FALSE	FALSE	FALSE
SH	DLBCL	rs6567160	FALSE	FALSE	FALSE	FALSE	TRUE	FALSE	FALSE	FALSE	FALSE	FALSE	FALSE
SH	DLBCL	rs6567160	FALSE	FALSE	FALSE	FALSE	TRUE	FALSE	FALSE	FALSE	FALSE	FALSE	FALSE
SH	DLBCL	rs6567160	FALSE	FALSE	FALSE	FALSE	TRUE	FALSE	FALSE	FALSE	FALSE	FALSE	FALSE
SH	DLBCL	rs6567160	FALSE	FALSE	FALSE	FALSE	TRUE	FALSE	FALSE	FALSE	FALSE	FALSE	FALSE
SH	DLBCL	rs6567160	FALSE	FALSE	FALSE	FALSE	TRUE	FALSE	FALSE	FALSE	FALSE	FALSE	FALSE
SH	DLBCL	rs6567160	FALSE	FALSE	FALSE	FALSE	TRUE	FALSE	FALSE	FALSE	FALSE	FALSE	FALSE
SH	DLBCL	rs6567160	FALSE	FALSE	FALSE	FALSE	TRUE	FALSE	FALSE	FALSE	FALSE	FALSE	FALSE
SH	DLBCL	rs9300607	FALSE	FALSE	FALSE	FALSE	TRUE	FALSE	FALSE	FALSE	FALSE	FALSE	FALSE
SH	DLBCL	rs1019075	FALSE	FALSE	TRUE	FALSE	FALSE	FALSE	FALSE	FALSE	FALSE	FALSE	FALSE
SH	DLBCL	rs11051456	FALSE	FALSE	TRUE	FALSE	FALSE	FALSE	FALSE	FALSE	FALSE	FALSE	FALSE
SH	DLBCL	rs10046853	FALSE	TRUE	FALSE	FALSE	FALSE	FALSE	FALSE	FALSE	FALSE	FALSE	FALSE
SH	DLBCL	rs10228350	FALSE	TRUE	FALSE	FALSE	FALSE	FALSE	FALSE	FALSE	FALSE	FALSE	FALSE
SH	DLBCL	rs10811092	FALSE	TRUE	FALSE	FALSE	FALSE	FALSE	FALSE	FALSE	FALSE	FALSE	FALSE
SH	DLBCL	rs11664336	FALSE	TRUE	FALSE	FALSE	FALSE	FALSE	FALSE	FALSE	FALSE	FALSE	FALSE
SH	DLBCL	rs11678288	FALSE	TRUE	FALSE	FALSE	FALSE	FALSE	FALSE	FALSE	FALSE	FALSE	FALSE
SH	DLBCL	rs12572775	FALSE	TRUE	FALSE	FALSE	FALSE	FALSE	FALSE	FALSE	FALSE	FALSE	FALSE
SH	DLBCL	rs13102005	FALSE	TRUE	FALSE	FALSE	FALSE	FALSE	FALSE	FALSE	FALSE	FALSE	FALSE
SH	DLBCL	rs1467847	FALSE	TRUE	FALSE	FALSE	FALSE	FALSE	FALSE	FALSE	FALSE	FALSE	FALSE
SH	DLBCL	rs153661	FALSE	TRUE	FALSE	FALSE	FALSE	FALSE	FALSE	FALSE	FALSE	FALSE	FALSE
SH	DLBCL	rs16905189	FALSE	TRUE	FALSE	FALSE	FALSE	FALSE	FALSE	FALSE	FALSE	FALSE	FALSE
SH	DLBCL	rs172179	FALSE	TRUE	FALSE	FALSE	FALSE	FALSE	FALSE	FALSE	FALSE	FALSE	FALSE
SH	DLBCL	rs1875969	FALSE	TRUE	FALSE	FALSE	FALSE	FALSE	FALSE	FALSE	FALSE	FALSE	FALSE
SH	DLBCL	rs2061708	FALSE	TRUE	FALSE	FALSE	FALSE	FALSE	FALSE	FALSE	FALSE	FALSE	FALSE
SH	DLBCL	rs2384145	FALSE	TRUE	FALSE	FALSE	FALSE	FALSE	FALSE	FALSE	FALSE	FALSE	FALSE
SH	DLBCL	rs3771382	FALSE	TRUE	FALSE	FALSE	FALSE	FALSE	FALSE	FALSE	FALSE	FALSE	FALSE
SH	DLBCL	rs3790086	FALSE	TRUE	FALSE	FALSE	FALSE	FALSE	FALSE	FALSE	FALSE	FALSE	FALSE
SH	DLBCL	rs3812163	FALSE	TRUE	FALSE	FALSE	FALSE	FALSE	FALSE	FALSE	FALSE	FALSE	FALSE
SH	DLBCL	rs418280	FALSE	TRUE	FALSE	FALSE	FALSE	FALSE	FALSE	FALSE	FALSE	FALSE	FALSE
SH	DLBCL	rs4302014	FALSE	TRUE	FALSE	FALSE	FALSE	FALSE	FALSE	FALSE	FALSE	FALSE	FALSE
SH	DLBCL	rs5759006	FALSE	TRUE	FALSE	FALSE	FALSE	FALSE	FALSE	FALSE	FALSE	FALSE	FALSE
SH	DLBCL	rs6464921	FALSE	TRUE	FALSE	FALSE	FALSE	FALSE	FALSE	FALSE	FALSE	FALSE	FALSE
SH	DLBCL	rs7652177	FALSE	TRUE	FALSE	FALSE	FALSE	FALSE	FALSE	FALSE	FALSE	FALSE	FALSE
SH	DLBCL	rs7847059	FALSE	TRUE	FALSE	FALSE	FALSE	FALSE	FALSE	FALSE	FALSE	FALSE	FALSE
SH	DLBCL	rs832806	FALSE	TRUE	FALSE	FALSE	FALSE	FALSE	FALSE	FALSE	FALSE	FALSE	FALSE
SH	DLBCL	rs9352895	FALSE	TRUE	FALSE	FALSE	FALSE	FALSE	FALSE	FALSE	FALSE	FALSE	FALSE
SH	DLBCL	rs9976812	FALSE	TRUE	FALSE	FALSE	FALSE	FALSE	FALSE	FALSE	FALSE	FALSE	FALSE
Wt	DLBCL	rs10269774	FALSE	FALSE	FALSE	FALSE	TRUE	FALSE	FALSE	FALSE	FALSE	FALSE	FALSE
Wt	DLBCL	rs1163627	FALSE	FALSE	FALSE	FALSE	TRUE	FALSE	FALSE	FALSE	FALSE	FALSE	FALSE
Wt	DLBCL	rs12286929	FALSE	FALSE	FALSE	FALSE	TRUE	FALSE	FALSE	FALSE	FALSE	FALSE	FALSE
Wt	DLBCL	rs12765002	FALSE	FALSE	FALSE	FALSE	TRUE	FALSE	FALSE	FALSE	FALSE	FALSE	FALSE
Wt	DLBCL	rs13007086	FALSE	FALSE	FALSE	FALSE	TRUE	FALSE	FALSE	FALSE	FALSE	FALSE	FALSE
Wt	DLBCL	rs13007086	FALSE	FALSE	FALSE	FALSE	TRUE	FALSE	FALSE	FALSE	FALSE	FALSE	FALSE
Wt	DLBCL	rs13007086	FALSE	FALSE	FALSE	FALSE	TRUE	FALSE	FALSE	FALSE	FALSE	FALSE	FALSE
Wt	DLBCL	rs13007086	FALSE	FALSE	FALSE	FALSE	TRUE	FALSE	FALSE	FALSE	FALSE	FALSE	FALSE
Wt	DLBCL	rs17024393	FALSE	FALSE	FALSE	FALSE	TRUE	FALSE	FALSE	FALSE	FALSE	FALSE	FALSE
Wt	DLBCL	rs17024393	FALSE	FALSE	FALSE	FALSE	TRUE	FALSE	FALSE	FALSE	FALSE	FALSE	FALSE
Wt	DLBCL	rs2404324	FALSE	FALSE	FALSE	FALSE	TRUE	FALSE	FALSE	FALSE	FALSE	FALSE	FALSE
Wt	DLBCL	rs2494196	FALSE	FALSE	FALSE	FALSE	TRUE	FALSE	FALSE	FALSE	FALSE	FALSE	FALSE
Wt	DLBCL	rs2494196	FALSE	FALSE	FALSE	FALSE	TRUE	FALSE	FALSE	FALSE	FALSE	FALSE	FALSE
Wt	DLBCL	rs2568958	FALSE	FALSE	FALSE	FALSE	TRUE	FALSE	FALSE	FALSE	FALSE	FALSE	FALSE
Wt	DLBCL	rs2568958	FALSE	FALSE	FALSE	FALSE	TRUE	FALSE	FALSE	FALSE	FALSE	FALSE	FALSE
Wt	DLBCL	rs34517439	FALSE	FALSE	FALSE	FALSE	TRUE	FALSE	FALSE	FALSE	FALSE	FALSE	FALSE
Wt	DLBCL	rs355865	FALSE	FALSE	FALSE	FALSE	TRUE	FALSE	FALSE	FALSE	FALSE	FALSE	FALSE
Wt	DLBCL	rs355865	FALSE	FALSE	FALSE	FALSE	TRUE	FALSE	FALSE	FALSE	FALSE	FALSE	FALSE
Wt	DLBCL	rs4458695	FALSE	FALSE	FALSE	FALSE	TRUE	FALSE	FALSE	FALSE	FALSE	FALSE	FALSE
Wt	DLBCL	rs4653016	FALSE	FALSE	FALSE	FALSE	TRUE	FALSE	FALSE	FALSE	FALSE	FALSE	FALSE
Wt	DLBCL	rs4851029	FALSE	FALSE	FALSE	FALSE	TRUE	FALSE	FALSE	FALSE	FALSE	FALSE	FALSE
Wt	DLBCL	rs543874	FALSE	FALSE	FALSE	FALSE	TRUE	FALSE	FALSE	FALSE	FALSE	FALSE	FALSE
Wt	DLBCL	rs543874	FALSE	FALSE	FALSE	FALSE	TRUE	FALSE	FALSE	FALSE	FALSE	FALSE	FALSE
Wt	DLBCL	rs543874	FALSE	FALSE	FALSE	FALSE	TRUE	FALSE	FALSE	FALSE	FALSE	FALSE	FALSE
Wt	DLBCL	rs543874	FALSE	FALSE	FALSE	FALSE	TRUE	FALSE	FALSE	FALSE	FALSE	FALSE	FALSE
Wt	DLBCL	rs543874	FALSE	FALSE	FALSE	FALSE	TRUE	FALSE	FALSE	FALSE	FALSE	FALSE	FALSE
Wt	DLBCL	rs543874	FALSE	FALSE	FALSE	FALSE	TRUE	FALSE	FALSE	FALSE	FALSE	FALSE	FALSE
Wt	DLBCL	rs543874	FALSE	FALSE	FALSE	FALSE	TRUE	FALSE	FALSE	FALSE	FALSE	FALSE	FALSE
Wt	DLBCL	rs543874	FALSE	FALSE	FALSE	FALSE	TRUE	FALSE	FALSE	FALSE	FALSE	FALSE	FALSE
Wt	DLBCL	rs62396185	FALSE	FALSE	FALSE	FALSE	TRUE	FALSE	FALSE	FALSE	FALSE	FALSE	FALSE
Wt	DLBCL	rs62396185	FALSE	FALSE	FALSE	FALSE	TRUE	FALSE	FALSE	FALSE	FALSE	FALSE	FALSE
Wt	DLBCL	rs6567160	FALSE	FALSE	FALSE	FALSE	TRUE	FALSE	FALSE	FALSE	FALSE	FALSE	FALSE
Wt	DLBCL	rs6567160	FALSE	FALSE	FALSE	FALSE	TRUE	FALSE	FALSE	FALSE	FALSE	FALSE	FALSE
Wt	DLBCL	rs6567160	FALSE	FALSE	FALSE	FALSE	TRUE	FALSE	FALSE	FALSE	FALSE	FALSE	FALSE
Wt	DLBCL	rs6567160	FALSE	FALSE	FALSE	FALSE	TRUE	FALSE	FALSE	FALSE	FALSE	FALSE	FALSE
Wt	DLBCL	rs6567160	FALSE	FALSE	FALSE	FALSE	TRUE	FALSE	FALSE	FALSE	FALSE	FALSE	FALSE
Wt	DLBCL	rs6567160	FALSE	FALSE	FALSE	FALSE	TRUE	FALSE	FALSE	FALSE	FALSE	FALSE	FALSE
Wt	DLBCL	rs6567160	FALSE	FALSE	FALSE	FALSE	TRUE	FALSE	FALSE	FALSE	FALSE	FALSE	FALSE
Wt	DLBCL	rs6567160	FALSE	FALSE	FALSE	FALSE	TRUE	FALSE	FALSE	FALSE	FALSE	FALSE	FALSE
Wt	DLBCL	rs6567160	FALSE	FALSE	FALSE	FALSE	TRUE	FALSE	FALSE	FALSE	FALSE	FALSE	FALSE
Wt	DLBCL	rs6567160	FALSE	FALSE	FALSE	FALSE	TRUE	FALSE	FALSE	FALSE	FALSE	FALSE	FALSE
Wt	DLBCL	rs6585827	FALSE	FALSE	FALSE	FALSE	TRUE	FALSE	FALSE	FALSE	FALSE	FALSE	FALSE
Wt	DLBCL	rs6669189	FALSE	FALSE	FALSE	FALSE	TRUE	FALSE	FALSE	FALSE	FALSE	FALSE	FALSE
Wt	DLBCL	rs7132908	FALSE	FALSE	FALSE	FALSE	TRUE	FALSE	FALSE	FALSE	FALSE	FALSE	FALSE
Wt	DLBCL	rs73048928	FALSE	FALSE	FALSE	FALSE	TRUE	FALSE	FALSE	FALSE	FALSE	FALSE	FALSE
Wt	DLBCL	rs7632381	FALSE	FALSE	FALSE	FALSE	TRUE	FALSE	FALSE	FALSE	FALSE	FALSE	FALSE
Wt	DLBCL	rs7632381	FALSE	FALSE	FALSE	FALSE	TRUE	FALSE	FALSE	FALSE	FALSE	FALSE	FALSE
Wt	DLBCL	rs9876664	FALSE	FALSE	FALSE	FALSE	TRUE	FALSE	FALSE	FALSE	FALSE	FALSE	FALSE
Wt	DLBCL	rs10063744	FALSE	TRUE	FALSE	FALSE	FALSE	FALSE	FALSE	FALSE	FALSE	FALSE	FALSE
Wt	DLBCL	rs10158176	FALSE	TRUE	FALSE	FALSE	FALSE	FALSE	FALSE	FALSE	FALSE	FALSE	FALSE
Wt	DLBCL	rs10423928	FALSE	TRUE	FALSE	FALSE	FALSE	FALSE	FALSE	FALSE	FALSE	FALSE	FALSE
Wt	DLBCL	rs10740991	FALSE	TRUE	FALSE	FALSE	FALSE	FALSE	FALSE	FALSE	FALSE	FALSE	FALSE
Wt	DLBCL	rs10795084	FALSE	TRUE	FALSE	FALSE	FALSE	FALSE	FALSE	FALSE	FALSE	FALSE	FALSE
Wt	DLBCL	rs10851978	FALSE	TRUE	FALSE	FALSE	FALSE	FALSE	FALSE	FALSE	FALSE	FALSE	FALSE
Wt	DLBCL	rs10853340	FALSE	TRUE	FALSE	FALSE	FALSE	FALSE	FALSE	FALSE	FALSE	FALSE	FALSE
Wt	DLBCL	rs10865534	FALSE	TRUE	FALSE	FALSE	FALSE	FALSE	FALSE	FALSE	FALSE	FALSE	FALSE
Wt	DLBCL	rs11150461	FALSE	TRUE	FALSE	FALSE	FALSE	FALSE	FALSE	FALSE	FALSE	FALSE	FALSE
Wt	DLBCL	rs11161044	FALSE	TRUE	FALSE	FALSE	FALSE	FALSE	FALSE	FALSE	FALSE	FALSE	FALSE
Wt	DLBCL	rs11216315	FALSE	TRUE	FALSE	FALSE	FALSE	FALSE	FALSE	FALSE	FALSE	FALSE	FALSE
Wt	DLBCL	rs112329422	FALSE	TRUE	FALSE	FALSE	FALSE	FALSE	FALSE	FALSE	FALSE	FALSE	FALSE
Wt	DLBCL	rs11245188	FALSE	TRUE	FALSE	FALSE	FALSE	FALSE	FALSE	FALSE	FALSE	FALSE	FALSE
Wt	DLBCL	rs115771494	FALSE	TRUE	FALSE	FALSE	FALSE	FALSE	FALSE	FALSE	FALSE	FALSE	FALSE
Wt	DLBCL	rs11680549	FALSE	TRUE	FALSE	FALSE	FALSE	FALSE	FALSE	FALSE	FALSE	FALSE	FALSE
Wt	DLBCL	rs117176448	FALSE	TRUE	FALSE	FALSE	FALSE	FALSE	FALSE	FALSE	FALSE	FALSE	FALSE
Wt	DLBCL	rs117319490	FALSE	TRUE	FALSE	FALSE	FALSE	FALSE	FALSE	FALSE	FALSE	FALSE	FALSE
Wt	DLBCL	rs11863963	FALSE	TRUE	FALSE	FALSE	FALSE	FALSE	FALSE	FALSE	FALSE	FALSE	FALSE
Wt	DLBCL	rs1187321	FALSE	TRUE	FALSE	FALSE	FALSE	FALSE	FALSE	FALSE	FALSE	FALSE	FALSE
Wt	DLBCL	rs11997525	FALSE	TRUE	FALSE	FALSE	FALSE	FALSE	FALSE	FALSE	FALSE	FALSE	FALSE
Wt	DLBCL	rs12449219	FALSE	TRUE	FALSE	FALSE	FALSE	FALSE	FALSE	FALSE	FALSE	FALSE	FALSE
Wt	DLBCL	rs12723378	FALSE	TRUE	FALSE	FALSE	FALSE	FALSE	FALSE	FALSE	FALSE	FALSE	FALSE
Wt	DLBCL	rs1286058	FALSE	TRUE	FALSE	FALSE	FALSE	FALSE	FALSE	FALSE	FALSE	FALSE	FALSE
Wt	DLBCL	rs1291114	FALSE	TRUE	FALSE	FALSE	FALSE	FALSE	FALSE	FALSE	FALSE	FALSE	FALSE
Wt	DLBCL	rs13007086	FALSE	TRUE	FALSE	FALSE	FALSE	FALSE	FALSE	FALSE	FALSE	FALSE	FALSE
Wt	DLBCL	rs13218383	FALSE	TRUE	FALSE	FALSE	FALSE	FALSE	FALSE	FALSE	FALSE	FALSE	FALSE
Wt	DLBCL	rs145350287	FALSE	TRUE	FALSE	FALSE	FALSE	FALSE	FALSE	FALSE	FALSE	FALSE	FALSE
Wt	DLBCL	rs148636479	FALSE	TRUE	FALSE	FALSE	FALSE	FALSE	FALSE	FALSE	FALSE	FALSE	FALSE
Wt	DLBCL	rs1606739	FALSE	TRUE	FALSE	FALSE	FALSE	FALSE	FALSE	FALSE	FALSE	FALSE	FALSE
Wt	DLBCL	rs16868443	FALSE	TRUE	FALSE	FALSE	FALSE	FALSE	FALSE	FALSE	FALSE	FALSE	FALSE
Wt	DLBCL	rs17016665	FALSE	TRUE	FALSE	FALSE	FALSE	FALSE	FALSE	FALSE	FALSE	FALSE	FALSE
Wt	DLBCL	rs17167315	FALSE	TRUE	FALSE	FALSE	FALSE	FALSE	FALSE	FALSE	FALSE	FALSE	FALSE
Wt	DLBCL	rs1801282	FALSE	TRUE	FALSE	FALSE	FALSE	FALSE	FALSE	FALSE	FALSE	FALSE	FALSE
Wt	DLBCL	rs1968109	FALSE	TRUE	FALSE	FALSE	FALSE	FALSE	FALSE	FALSE	FALSE	FALSE	FALSE
Wt	DLBCL	rs2016235	FALSE	TRUE	FALSE	FALSE	FALSE	FALSE	FALSE	FALSE	FALSE	FALSE	FALSE
Wt	DLBCL	rs2079860	FALSE	TRUE	FALSE	FALSE	FALSE	FALSE	FALSE	FALSE	FALSE	FALSE	FALSE
Wt	DLBCL	rs2120450	FALSE	TRUE	FALSE	FALSE	FALSE	FALSE	FALSE	FALSE	FALSE	FALSE	FALSE
Wt	DLBCL	rs2270894	FALSE	TRUE	FALSE	FALSE	FALSE	FALSE	FALSE	FALSE	FALSE	FALSE	FALSE
Wt	DLBCL	rs2530399	FALSE	TRUE	FALSE	FALSE	FALSE	FALSE	FALSE	FALSE	FALSE	FALSE	FALSE
Wt	DLBCL	rs25849	FALSE	TRUE	FALSE	FALSE	FALSE	FALSE	FALSE	FALSE	FALSE	FALSE	FALSE
Wt	DLBCL	rs28547477	FALSE	TRUE	FALSE	FALSE	FALSE	FALSE	FALSE	FALSE	FALSE	FALSE	FALSE
Wt	DLBCL	rs28601761	FALSE	TRUE	FALSE	FALSE	FALSE	FALSE	FALSE	FALSE	FALSE	FALSE	FALSE
Wt	DLBCL	rs2870710	FALSE	TRUE	FALSE	FALSE	FALSE	FALSE	FALSE	FALSE	FALSE	FALSE	FALSE
Wt	DLBCL	rs291263	FALSE	TRUE	FALSE	FALSE	FALSE	FALSE	FALSE	FALSE	FALSE	FALSE	FALSE
Wt	DLBCL	rs35792595	FALSE	TRUE	FALSE	FALSE	FALSE	FALSE	FALSE	FALSE	FALSE	FALSE	FALSE
Wt	DLBCL	rs4290239	FALSE	TRUE	FALSE	FALSE	FALSE	FALSE	FALSE	FALSE	FALSE	FALSE	FALSE
Wt	DLBCL	rs4776970	FALSE	TRUE	FALSE	FALSE	FALSE	FALSE	FALSE	FALSE	FALSE	FALSE	FALSE
Wt	DLBCL	rs4851283	FALSE	TRUE	FALSE	FALSE	FALSE	FALSE	FALSE	FALSE	FALSE	FALSE	FALSE
Wt	DLBCL	rs4966012	FALSE	TRUE	FALSE	FALSE	FALSE	FALSE	FALSE	FALSE	FALSE	FALSE	FALSE
Wt	DLBCL	rs56228832	FALSE	TRUE	FALSE	FALSE	FALSE	FALSE	FALSE	FALSE	FALSE	FALSE	FALSE
Wt	DLBCL	rs6069016	FALSE	TRUE	FALSE	FALSE	FALSE	FALSE	FALSE	FALSE	FALSE	FALSE	FALSE
Wt	DLBCL	rs61875762	FALSE	TRUE	FALSE	FALSE	FALSE	FALSE	FALSE	FALSE	FALSE	FALSE	FALSE
Wt	DLBCL	rs61898343	FALSE	TRUE	FALSE	FALSE	FALSE	FALSE	FALSE	FALSE	FALSE	FALSE	FALSE
Wt	DLBCL	rs62396185	FALSE	TRUE	FALSE	FALSE	FALSE	FALSE	FALSE	FALSE	FALSE	FALSE	FALSE
Wt	DLBCL	rs62491284	FALSE	TRUE	FALSE	FALSE	FALSE	FALSE	FALSE	FALSE	FALSE	FALSE	FALSE
Wt	DLBCL	rs667515	FALSE	TRUE	FALSE	FALSE	FALSE	FALSE	FALSE	FALSE	FALSE	FALSE	FALSE
Wt	DLBCL	rs6696828	FALSE	TRUE	FALSE	FALSE	FALSE	FALSE	FALSE	FALSE	FALSE	FALSE	FALSE
Wt	DLBCL	rs67747001	FALSE	TRUE	FALSE	FALSE	FALSE	FALSE	FALSE	FALSE	FALSE	FALSE	FALSE
Wt	DLBCL	rs6774894	FALSE	TRUE	FALSE	FALSE	FALSE	FALSE	FALSE	FALSE	FALSE	FALSE	FALSE
Wt	DLBCL	rs7073150	FALSE	TRUE	FALSE	FALSE	FALSE	FALSE	FALSE	FALSE	FALSE	FALSE	FALSE
Wt	DLBCL	rs7442885	FALSE	TRUE	FALSE	FALSE	FALSE	FALSE	FALSE	FALSE	FALSE	FALSE	FALSE
Wt	DLBCL	rs754635	FALSE	TRUE	FALSE	FALSE	FALSE	FALSE	FALSE	FALSE	FALSE	FALSE	FALSE
Wt	DLBCL	rs75982888	FALSE	TRUE	FALSE	FALSE	FALSE	FALSE	FALSE	FALSE	FALSE	FALSE	FALSE
Wt	DLBCL	rs7619139	FALSE	TRUE	FALSE	FALSE	FALSE	FALSE	FALSE	FALSE	FALSE	FALSE	FALSE
Wt	DLBCL	rs7740107	FALSE	TRUE	FALSE	FALSE	FALSE	FALSE	FALSE	FALSE	FALSE	FALSE	FALSE
Wt	DLBCL	rs779655	FALSE	TRUE	FALSE	FALSE	FALSE	FALSE	FALSE	FALSE	FALSE	FALSE	FALSE
Wt	DLBCL	rs78470967	FALSE	TRUE	FALSE	FALSE	FALSE	FALSE	FALSE	FALSE	FALSE	FALSE	FALSE
Wt	DLBCL	rs7933019	FALSE	TRUE	FALSE	FALSE	FALSE	FALSE	FALSE	FALSE	FALSE	FALSE	FALSE
Wt	DLBCL	rs7946756	FALSE	TRUE	FALSE	FALSE	FALSE	FALSE	FALSE	FALSE	FALSE	FALSE	FALSE
Wt	DLBCL	rs8118253	FALSE	TRUE	FALSE	FALSE	FALSE	FALSE	FALSE	FALSE	FALSE	FALSE	FALSE
Wt	DLBCL	rs900448	FALSE	TRUE	FALSE	FALSE	FALSE	FALSE	FALSE	FALSE	FALSE	FALSE	FALSE
Wt	DLBCL	rs9478499	FALSE	TRUE	FALSE	FALSE	FALSE	FALSE	FALSE	FALSE	FALSE	FALSE	FALSE
Wt	DLBCL	rs961288	FALSE	TRUE	FALSE	FALSE	FALSE	FALSE	FALSE	FALSE	FALSE	FALSE	FALSE

## Sheet:  Table 6
Table 6 - List of SNPs instrumenting for AIs on FL, DLBCL.
Exposure	Outcome	SNPs	EA	OA	Chr	Pos	R2	F	F-Mean	p(Exposuer)	p(Outcome)
BMI	FL	rs1000096	T	C	4	38692835	8.54756e-05	39.4468	57.4967	5.10035e-11	0.8486
BMI	FL	rs10063055	T	C	5	140990108	7.0778e-05	32.6634	57.4967	1.7e-09	0.8537
BMI	FL	rs10099330	G	A	8	143383694	7.65002e-05	35.3043	57.4967	4.20001e-10	0.4422
BMI	FL	rs10144067	T	C	14	93885198	0.000166739	76.9558	57.4967	5.60015e-20	0.2995
BMI	FL	rs10169594	C	T	2	41637688	6.87032e-05	31.7058	57.4967	2.99999e-09	0.3853
BMI	FL	rs10172070	T	C	2	208307761	6.51256e-05	30.0547	57.4967	6.69993e-09	0.4661
BMI	FL	rs10505836	C	A	12	19288508	8.22752e-05	37.9697	57.4967	1.2e-10	0.0290402
BMI	FL	rs10510025	T	C	10	118650996	0.000114762	52.964	57.4967	2.19989e-14	0.2209
BMI	FL	rs1064213	A	G	2	198950240	0.000111246	51.3408	57.4967	3.69999e-14	0.6709
BMI	FL	rs10742752	C	T	11	45438374	6.60883e-05	30.499	57.4967	6.1e-09	0.9625
BMI	FL	rs10756714	G	A	9	15885041	0.000213342	98.4694	57.4967	1.9002e-25	0.9067
BMI	FL	rs10756792	T	C	9	16726119	0.000138747	64.035	57.4967	4.90004e-17	0.8499
BMI	FL	rs10760277	T	C	9	126093999	9.11491e-05	42.0653	57.4967	1e-11	0.4179
BMI	FL	rs10780248	A	G	9	81370555	7.2447e-05	33.4337	57.4967	1.2e-09	0.3201
BMI	FL	rs1078141	T	C	8	142619393	9.57024e-05	44.1668	57.4967	4.90004e-12	0.2259
BMI	FL	rs10824211	T	C	10	76363107	0.000103551	47.7894	57.4967	4.30031e-13	0.0186299
BMI	FL	rs10927006	C	T	1	243557659	6.95901e-05	32.1151	57.4967	2.30001e-09	0.407
BMI	FL	rs10965698	T	C	9	23203619	5.92497e-05	27.3429	57.4967	3.89996e-08	0.6807
BMI	FL	rs10989067	A	G	9	103119634	0.000124203	57.3216	57.4967	1.39991e-15	0.4594
BMI	FL	rs11001963	T	C	10	78760959	6.63993e-05	30.6425	57.4967	7.29995e-09	0.4316
BMI	FL	rs11009685	T	C	10	34511990	6.31682e-05	29.1513	57.4967	1.40001e-08	0.6786
BMI	FL	rs11079849	T	C	17	47090785	0.000178124	82.2113	57.4967	1.80011e-21	0.8281
BMI	FL	rs11099020	T	C	4	130724902	9.28965e-05	42.8718	57.4967	5.60015e-12	0.8767
BMI	FL	rs11115160	A	G	12	82424100	6.19883e-05	28.6068	57.4967	2.19999e-08	0.2326
BMI	FL	rs11122450	G	T	1	230301811	6.42686e-05	29.6592	57.4967	9.09997e-09	0.0178
BMI	FL	rs11134679	G	A	5	170623391	0.000143729	66.3346	57.4967	1.20005e-17	0.8851
BMI	FL	rs11150745	G	A	17	78757626	0.000194136	89.6032	57.4967	2.90001e-23	0.9573
BMI	FL	rs111598585	T	C	4	171635471	6.68226e-05	30.8379	57.4967	5.39995e-09	0.368
BMI	FL	rs11165643	T	C	1	96924097	0.000180793	83.4435	57.4967	4.90004e-22	0.751
BMI	FL	rs11218510	A	G	11	121922587	0.000100425	46.3468	57.4967	8.4004e-13	0.8044
BMI	FL	rs113079574	T	C	4	147354089	7.56434e-05	34.9089	57.4967	5.80003e-10	0.675
BMI	FL	rs113603865	T	C	1	39564930	0.000115625	53.3625	57.4967	1.80011e-14	0.4653
BMI	FL	rs113624107	A	G	14	88326386	7.91656e-05	36.5345	57.4967	2.1e-10	0.9584
BMI	FL	rs115056380	A	G	1	111338672	6.05072e-05	27.9232	57.4967	2.5e-08	0.2047
BMI	FL	rs11525873	C	T	7	138817193	0.00010137	46.7827	57.4967	6.59933e-13	0.8038
BMI	FL	rs11607476	C	A	11	115037061	0.000123344	56.9253	57.4967	3.10027e-15	0.7365
BMI	FL	rs11630647	A	G	15	99240947	6.05147e-05	27.9267	57.4967	2.69998e-08	0.576301
BMI	FL	rs116374395	A	G	5	50723410	6.94997e-05	32.0734	57.4967	2.80001e-09	0.5235
BMI	FL	rs11641179	G	A	16	6716711	6.01347e-05	27.7513	57.4967	3.40001e-08	0.5051
BMI	FL	rs11642090	C	T	16	81730582	6.10196e-05	28.1597	57.4967	2.90001e-08	0.697
BMI	FL	rs11656076	A	G	17	31464270	8.29568e-05	38.2842	57.4967	7.59976e-11	0.8541
BMI	FL	rs1167311	A	G	1	49996959	0.000161167	74.384	57.4967	1.59993e-19	0.6387
BMI	FL	rs11675464	G	A	2	204053742	7.05636e-05	32.5644	57.4967	1.6e-09	0.7247
BMI	FL	rs11691869	A	C	2	100805996	0.000172347	79.5447	57.4967	5.60015e-21	0.0274
BMI	FL	rs11699828	A	G	20	62157198	7.77368e-05	35.875	57.4967	8.60003e-09	0.303
BMI	FL	rs11709402	G	A	3	131551027	0.00020937	96.6357	57.4967	4.90004e-25	0.3245
BMI	FL	rs117342986	T	C	16	54267868	6.88221e-05	31.7607	57.4967	1.6e-08	0.9718
BMI	FL	rs11757278	C	T	6	13180454	9.05149e-05	41.7726	57.4967	9.8992e-12	0.7145
BMI	FL	rs11778219	G	A	8	87762607	6.81241e-05	31.4386	57.4967	4.20001e-09	0.34
BMI	FL	rs118136827	T	G	17	2168104	7.1042e-05	32.7852	57.4967	1.7e-09	0.2366
BMI	FL	rs11842871	T	G	13	31042452	8.70636e-05	40.1797	57.4967	2.80027e-11	0.4052
BMI	FL	rs12001437	C	T	9	34074476	6.90219e-05	31.8529	57.4967	2.80001e-09	0.4807
BMI	FL	rs12072739	G	A	1	98315893	8.58305e-05	39.6106	57.4967	3.29989e-11	0.8858
BMI	FL	rs12088284	T	C	1	80798635	8.16486e-05	37.6805	57.4967	8.9002e-11	0.3214
BMI	FL	rs12140153	T	G	1	62579891	0.000186779	86.2067	57.4967	1.20005e-21	0.9773
BMI	FL	rs12149660	A	G	16	70309237	0.000105165	48.5343	57.4967	2.99985e-13	0.606001
BMI	FL	rs12259464	A	G	10	53680099	8.55849e-05	39.4972	57.4967	4.49987e-11	0.2534
BMI	FL	rs12273545	T	C	11	116911012	6.57863e-05	30.3596	57.4967	6.80002e-09	0.6354
BMI	FL	rs1229984	C	T	4	100239319	7.39187e-05	34.1129	57.4967	4.60002e-10	0.9991
BMI	FL	rs12364470	G	T	11	134601012	0.000102105	47.122	57.4967	4.90004e-13	0.683701
BMI	FL	rs12440603	T	C	15	46585722	9.52956e-05	43.9791	57.4967	3.40017e-12	0.3412
BMI	FL	rs12459368	G	A	19	18459377	0.000113632	52.4425	57.4967	2.49977e-14	0.1904
BMI	FL	rs12462975	A	G	19	30272202	0.000169487	78.2243	57.4967	2.60016e-20	0.8642
BMI	FL	rs12541408	C	T	8	95585807	8.89352e-05	41.0435	57.4967	1.59993e-11	0.0129199
BMI	FL	rs1266874	G	A	6	51779638	9.03694e-05	41.7055	57.4967	1e-11	0.0587895
BMI	FL	rs12681792	A	C	8	62054463	6.87632e-05	31.7335	57.4967	3.50002e-09	0.0485702
BMI	FL	rs12692596	T	C	2	161265910	8.00119e-05	36.9251	57.4967	1.29999e-10	0.8056
BMI	FL	rs12696039	G	A	3	156304750	5.93439e-05	27.3863	57.4967	3.50002e-08	0.4625
BMI	FL	rs12881629	G	A	14	101146413	7.38927e-05	34.1009	57.4967	7.69999e-10	0.1573
BMI	FL	rs12921986	G	A	16	72312727	5.94517e-05	27.4361	57.4967	3.79997e-08	0.7098
BMI	FL	rs1296328	C	A	4	137083193	0.000175408	80.9576	57.4967	3.90032e-21	0.9275
BMI	FL	rs12974458	T	C	19	1866115	0.000115363	53.2412	57.4967	2.29985e-14	0.8814
BMI	FL	rs13012070	A	G	2	35447243	6.5671e-05	30.3064	57.4967	6.1e-09	0.153
BMI	FL	rs13033310	A	G	2	133523605	6.00755e-05	27.724	57.4967	3.29997e-08	0.2099
BMI	FL	rs13107325	T	C	4	103188709	0.000313801	144.851	57.4967	8.49963e-37	0.9485
BMI	FL	rs13176429	C	T	5	43152216	8.60836e-05	39.7274	57.4967	3.10027e-11	0.8958
BMI	FL	rs1320251	T	C	17	21264396	0.000161249	74.4217	57.4967	1.50003e-19	0.1797
BMI	FL	rs1322842	G	A	6	20488897	8.20713e-05	37.8756	57.4967	1.09999e-10	0.5413
BMI	FL	rs13248187	C	T	8	14336834	9.76292e-05	45.0562	57.4967	1.99986e-12	0.8774
BMI	FL	rs1327259	G	A	6	51177811	0.000104746	48.3411	57.4967	2.80027e-13	0.8672
BMI	FL	rs13291723	A	G	9	80510077	5.96343e-05	27.5203	57.4967	3.40001e-08	0.909
BMI	FL	rs1330199	T	G	9	27760946	6.89633e-05	31.8259	57.4967	3.29997e-09	0.6904
BMI	FL	rs13427822	G	A	2	213414265	0.000130242	60.109	57.4967	5.60015e-16	0.9323
BMI	FL	rs1346841	A	G	4	65651730	8.21554e-05	37.9144	57.4967	9.70063e-11	0.5346
BMI	FL	rs1360201	T	C	9	73796450	8.44823e-05	38.9883	57.4967	4.79954e-11	0.6866
BMI	FL	rs140159717	T	C	15	73765586	9.206e-05	42.4857	57.4967	2.80027e-11	0.5438
BMI	FL	rs1441264	A	G	13	79580919	0.000154638	71.37	57.4967	3.40017e-18	0.8418
BMI	FL	rs1451963	T	G	14	41350367	7.44239e-05	34.346	57.4967	7.39997e-10	0.474
BMI	FL	rs1458156	T	C	12	41887940	9.89998e-05	45.6888	57.4967	1.20005e-12	0.0429596
BMI	FL	rs145981104	G	A	8	74714869	6.15357e-05	28.3979	57.4967	2e-08	0.3492
BMI	FL	rs146569428	A	G	11	2199686	6.2477e-05	28.8323	57.4967	2e-08	0.6173
BMI	FL	rs1471093	A	G	3	108031094	8.56784e-05	39.5404	57.4967	4.10015e-11	0.195
BMI	FL	rs147568678	C	T	10	93061851	6.4489e-05	29.7609	57.4967	1.09999e-08	0.8004
BMI	FL	rs1477290	C	T	5	87988934	0.000269692	124.485	57.4967	2.19989e-31	0.6712
BMI	FL	rs147730268	T	G	12	123024476	0.000195989	90.4586	57.4967	1.29987e-22	0.9587
BMI	FL	rs1503526	C	T	5	63020706	0.000118866	54.8581	57.4967	5.90065e-15	0.4364
BMI	FL	rs156914	A	G	1	16848652	6.22025e-05	28.7056	57.4967	1.6e-08	0.8705
BMI	FL	rs1582931	A	G	5	122657199	8.87482e-05	40.9572	57.4967	2.29985e-11	0.2317
BMI	FL	rs159037	C	T	5	94197477	5.7987e-05	26.7601	57.4967	4.90004e-08	0.1097
BMI	FL	rs1609010	G	A	8	77227464	0.000216221	99.7987	57.4967	7.89951e-26	0.3976
BMI	FL	rs1657930	A	G	15	57120989	6.8234e-05	31.4893	57.4967	3.50002e-09	0.1518
BMI	FL	rs16916303	G	A	9	30823761	7.80078e-05	36.0001	57.4967	4.20001e-10	0.2805
BMI	FL	rs17056301	C	T	5	158271680	7.03579e-05	32.4695	57.4967	2.19999e-09	0.2335
BMI	FL	rs17289010	G	A	4	140774684	7.99224e-05	36.8838	57.4967	1.6e-10	0.723701
BMI	FL	rs17399739	G	A	10	87490850	9.40206e-05	43.3906	57.4967	4.40048e-12	0.682801
BMI	FL	rs17544384	C	T	1	115295160	6.60994e-05	30.5041	57.4967	5.30005e-09	0.0727696
BMI	FL	rs17770336	T	C	9	28414625	0.000257864	119.024	57.4967	1.29987e-30	0.452
BMI	FL	rs1778830	A	G	1	156489974	9.15579e-05	42.254	57.4967	7.50067e-12	0.1038
BMI	FL	rs1834144	A	C	18	40744790	9.18433e-05	42.3857	57.4967	8.60003e-12	0.8716
BMI	FL	rs1861410	T	C	2	58933591	0.000223129	102.988	57.4967	1.20005e-26	0.3969
BMI	FL	rs1884897	G	A	20	6612832	0.000187039	86.3266	57.4967	2.29985e-22	0.9449
BMI	FL	rs1919243	C	T	5	88778861	6.81201e-05	31.4367	57.4967	5.49997e-09	0.2419
BMI	FL	rs2035936	T	G	3	141298124	0.000145154	66.9921	57.4967	1.69981e-17	0.9323
BMI	FL	rs2051559	C	T	4	3298800	9.57676e-05	44.197	57.4967	2.80027e-12	0.39
BMI	FL	rs2102278	G	A	4	52818664	6.14475e-05	28.3572	57.4967	2e-08	0.0446498
BMI	FL	rs213518	C	T	7	26941065	6.20303e-05	28.6261	57.4967	1.79999e-08	0.1774
BMI	FL	rs2153740	G	A	20	2126089	6.32364e-05	29.1828	57.4967	1.6e-08	0.0826894
BMI	FL	rs2172131	C	T	10	133978962	0.000108809	50.2163	57.4967	8.99912e-14	0.6353
BMI	FL	rs2192158	G	A	4	55505360	0.000111399	51.4118	57.4967	3.69999e-14	0.1959
BMI	FL	rs2216931	A	C	2	181599070	0.000127985	59.0673	57.4967	5.19996e-16	0.1865
BMI	FL	rs2234458	T	C	11	65639374	0.000191579	88.4228	57.4967	3.59998e-23	0.8271
BMI	FL	rs2248551	A	G	6	131924689	5.90202e-05	27.2369	57.4967	3.79997e-08	0.2663
BMI	FL	rs2271189	A	G	12	56494991	0.000127951	59.0517	57.4967	6.4998e-16	0.2221
BMI	FL	rs2289379	T	C	7	44804225	0.000111603	51.5059	57.4967	5.19996e-14	0.701
BMI	FL	rs2307111	C	T	5	75003678	0.000374833	173.035	57.4967	1.29987e-43	0.4406
BMI	FL	rs2342892	G	T	16	24540806	8.05247e-05	37.1618	57.4967	1.29999e-10	0.727699
BMI	FL	rs2381404	C	T	2	144035442	7.19306e-05	33.1954	57.4967	1.29999e-09	0.3013
BMI	FL	rs2383377	A	G	14	33257914	5.91068e-05	27.2769	57.4967	3.89996e-08	0.83
BMI	FL	rs2398861	G	A	9	96430747	0.000124322	57.3766	57.4967	2.09991e-15	0.466
BMI	FL	rs2425816	A	G	20	44895075	7.26118e-05	33.5097	57.4967	1.2e-09	0.753199
BMI	FL	rs2433733	A	G	2	230816703	0.000128952	59.5136	57.4967	3.80014e-16	0.5949
BMI	FL	rs2439823	G	A	10	99778226	0.000182782	84.3618	57.4967	5.30029e-22	0.5749
BMI	FL	rs2482356	C	T	9	94178371	6.31254e-05	29.1315	57.4967	1.29999e-08	0.9391
BMI	FL	rs2512892	C	T	11	131451862	8.23457e-05	38.0022	57.4967	9.20026e-11	0.5224
BMI	FL	rs252761	T	G	5	77380723	6.41296e-05	29.595	57.4967	1.2e-08	0.6127
BMI	FL	rs2568958	A	G	1	72765116	0.000237805	109.763	57.4967	1.59993e-28	0.283
BMI	FL	rs2569993	C	T	3	12926096	6.98999e-05	32.2581	57.4967	2.39999e-09	0.5807
BMI	FL	rs2606228	C	A	3	183537759	8.80611e-05	40.6401	57.4967	2.70023e-11	0.6458
BMI	FL	rs2616143	A	G	8	20632022	8.37492e-05	38.65	57.4967	6.70039e-11	0.8172
BMI	FL	rs2678204	G	T	1	201800511	0.000262049	120.956	57.4967	3.80014e-31	0.8002
BMI	FL	rs2725371	G	A	8	30854033	0.000108716	50.1732	57.4967	1.10002e-13	0.5416
BMI	FL	rs2791643	T	C	1	11207269	6.50089e-05	30.0008	57.4967	7.19996e-09	0.9091
BMI	FL	rs2814942	A	G	6	34644261	0.000358552	165.516	57.4967	5.30029e-42	0.7993
BMI	FL	rs28350	G	A	3	42418446	9.57161e-05	44.1732	57.4967	2.90001e-12	0.9782
BMI	FL	rs28366156	C	T	6	31671498	0.000159258	73.5024	57.4967	1.59993e-19	0.219
BMI	FL	rs2837996	C	T	21	42626706	7.28434e-05	33.6166	57.4967	1.09999e-09	0.0330499
BMI	FL	rs28404639	T	C	5	80874229	6.36722e-05	29.3839	57.4967	1.2e-08	0.2209
BMI	FL	rs28489620	A	G	22	41804716	9.73984e-05	44.9497	57.4967	2.80027e-12	0.7504
BMI	FL	rs28568418	A	G	15	53462969	6.42097e-05	29.632	57.4967	1.2e-08	0.4172
BMI	FL	rs2861685	C	T	2	67837553	0.000142129	65.5958	57.4967	1e-17	0.8868
BMI	FL	rs28670671	C	T	9	140363045	6.34479e-05	29.2804	57.4967	3.69999e-08	0.0406004
BMI	FL	rs2870111	T	C	15	79403585	0.000119663	55.226	57.4967	7.10068e-15	0.0880603
BMI	FL	rs2899644	T	C	15	59470366	7.93319e-05	36.6112	57.4967	2.30001e-10	0.0166001
BMI	FL	rs2920503	T	C	3	12324230	8.03004e-05	37.0582	57.4967	1.7e-10	0.4542
BMI	FL	rs2962334	T	G	5	86879056	7.35772e-05	33.9553	57.4967	7.79992e-10	0.998
BMI	FL	rs3213943	A	C	2	136389840	7.35308e-05	33.9339	57.4967	4.79999e-10	0.8915
BMI	FL	rs329651	T	G	11	133767622	7.79086e-05	35.9543	57.4967	3.29997e-10	0.2238
BMI	FL	rs34045288	T	C	6	40369081	0.000245397	113.268	57.4967	3.50026e-29	0.1277
BMI	FL	rs34153025	C	T	15	41339697	6.56244e-05	30.2849	57.4967	9.59997e-09	0.6689
BMI	FL	rs34234296	A	G	2	175166636	0.000106537	49.1675	57.4967	2.39994e-13	0.8999
BMI	FL	rs34481751	A	C	20	47501038	9.44874e-05	43.6061	57.4967	7.8001e-12	0.5272
BMI	FL	rs34696181	C	T	7	93096635	6.52243e-05	30.1003	57.4967	8.10009e-09	0.2333
BMI	FL	rs34811474	A	G	4	25408838	0.000288954	133.379	57.4967	4.10015e-34	0.6489
BMI	FL	rs349071	A	G	11	84776849	8.85274e-05	40.8553	57.4967	1.9002e-11	0.5638
BMI	FL	rs35364449	T	C	15	74278126	9.2067e-05	42.489	57.4967	9.20026e-12	0.7377
BMI	FL	rs35697587	A	G	14	47298505	0.000135557	62.5623	57.4967	9.20026e-17	0.8451
BMI	FL	rs35809007	A	G	2	47019521	0.000135276	62.4324	57.4967	9.09913e-17	0.874
BMI	FL	rs35957544	T	G	8	73440371	0.00018866	87.075	57.4967	1.10002e-22	0.1105
BMI	FL	rs36007635	A	G	6	163009335	0.000105176	48.5392	57.4967	2.19989e-13	0.451
BMI	FL	rs36061954	T	C	8	38329650	7.91078e-05	36.5078	57.4967	2e-10	0.236
BMI	FL	rs3764625	G	T	19	49649051	6.71566e-05	30.992	57.4967	5.19996e-09	0.443
BMI	FL	rs3784710	C	T	15	68072458	0.000309318	142.782	57.4967	2.49977e-36	0.773101
BMI	FL	rs3803286	G	A	14	103246470	0.000154416	71.2674	57.4967	6.4003e-19	0.0595004
BMI	FL	rs3807566	T	G	7	50564204	7.17661e-05	33.1194	57.4967	1.5e-09	0.0528202
BMI	FL	rs3814883	T	C	16	29994922	0.0002879	132.892	57.4967	1e-33	0.8442
BMI	FL	rs3866805	A	C	1	6657424	6.36416e-05	29.3698	57.4967	1.2e-08	0.9664
BMI	FL	rs3897102	T	C	12	123492112	7.0704e-05	32.6293	57.4967	2.5e-09	0.524901
BMI	FL	rs3935190	A	G	17	79084367	0.00010436	48.1628	57.4967	4.00037e-13	0.9229
BMI	FL	rs394608	C	T	21	46581798	0.00017265	79.6846	57.4967	9.49948e-21	0.4961
BMI	FL	rs40071	C	T	5	107496102	0.000201714	93.1012	57.4967	3.80014e-24	0.0354201
BMI	FL	rs4017425	T	C	3	44028764	7.88686e-05	36.3974	57.4967	2.1e-10	0.2314
BMI	FL	rs4055791	T	C	13	59266053	0.000154176	71.1567	57.4967	7.39946e-19	0.0185699
BMI	FL	rs41279738	G	T	1	110082551	0.000237035	109.408	57.4967	4.00037e-28	0.6084
BMI	FL	rs4148155	G	A	4	89054667	0.000105969	48.9055	57.4967	1.39991e-13	0.605701
BMI	FL	rs4261944	G	T	4	31003636	8.89806e-05	41.0645	57.4967	1.59993e-11	0.5702
BMI	FL	rs4267103	C	T	12	60966740	7.18388e-05	33.153	57.4967	1.40001e-09	0.489199
BMI	FL	rs4284600	C	T	15	31843528	7.12985e-05	32.9036	57.4967	2e-09	0.3685
BMI	FL	rs429343	G	A	2	147903382	0.000147481	68.0665	57.4967	3.29989e-18	0.8336
BMI	FL	rs429358	C	T	19	45411941	0.000185534	85.6323	57.4967	2.39994e-22	0.0572902
BMI	FL	rs4307239	G	A	7	24354300	7.32086e-05	33.7851	57.4967	1e-09	0.2932
BMI	FL	rs4444317	G	A	15	92573234	8.84931e-05	40.8395	57.4967	2.49977e-11	0.1253
BMI	FL	rs4456769	T	C	20	25190777	9.48976e-05	43.7954	57.4967	3.59998e-12	0.9908
BMI	FL	rs4477562	T	C	13	54104968	0.000196582	90.7324	57.4967	2.90001e-23	0.379
BMI	FL	rs4482463	A	C	2	205375909	0.000139408	64.3397	57.4967	2.99985e-17	0.4465
BMI	FL	rs45486197	A	G	19	2244849	8.14861e-05	37.6055	57.4967	1.7e-10	0.4841
BMI	FL	rs4605363	C	A	2	229010960	0.000120449	55.5888	57.4967	3.29989e-15	0.8761
BMI	FL	rs4648450	A	C	1	2723214	0.000109584	50.5738	57.4967	8.4004e-14	0.001704
BMI	FL	rs4658403	T	C	1	243832560	9.89409e-05	45.6616	57.4967	1e-12	0.319
BMI	FL	rs4672338	T	C	2	60217457	8.2129e-05	37.9022	57.4967	8.00018e-11	0.7685
BMI	FL	rs4722398	T	C	7	3125220	8.22435e-05	37.9551	57.4967	7.89951e-11	0.8126
BMI	FL	rs4764949	G	A	12	103658096	0.000148631	68.5973	57.4967	3.10027e-18	0.1664
BMI	FL	rs4790292	A	C	17	1824305	0.000168507	77.7721	57.4967	2.60016e-20	0.0242198
BMI	FL	rs4820410	G	A	22	40690385	0.000142385	65.7142	57.4967	1.69981e-17	0.691899
BMI	FL	rs4832298	T	C	2	86764004	0.000109778	50.6635	57.4967	5.40008e-14	0.9885
BMI	FL	rs4858940	C	T	3	88254820	0.000106545	49.1712	57.4967	1.39991e-13	0.4744
BMI	FL	rs4876611	G	A	8	116671848	0.000157268	72.5839	57.4967	3.29989e-19	0.7958
BMI	FL	rs4929923	C	T	11	8639200	0.000164277	75.8192	57.4967	4.49987e-20	0.3177
BMI	FL	rs512121	C	T	18	7548501	7.88114e-05	36.371	57.4967	2.59998e-10	0.1501
BMI	FL	rs529200	G	A	3	173114305	0.000142304	65.6765	57.4967	1.29987e-17	0.8562
BMI	FL	rs539515	C	A	1	177889025	0.00079943	369.199	57.4967	1.99986e-91	0.1521
BMI	FL	rs55707359	G	T	11	46159333	8.57757e-05	39.5853	57.4967	6.20012e-11	0.7946
BMI	FL	rs55714539	C	A	19	18207397	0.000139278	64.2797	57.4967	6.00067e-17	0.7381
BMI	FL	rs55726687	A	G	12	991306	0.000204356	94.321	57.4967	1.39991e-24	0.3297
BMI	FL	rs55769038	A	G	11	13331808	0.000125309	57.8322	57.4967	1.20005e-15	0.7996
BMI	FL	rs558887	G	A	11	28712741	7.19493e-05	33.204	57.4967	1.5e-09	0.7516
BMI	FL	rs559231	T	G	18	39644247	8.68362e-05	40.0747	57.4967	3.40017e-11	0.2111
BMI	FL	rs55966114	T	C	12	97584357	6.62842e-05	30.5894	57.4967	6.49995e-09	0.8287
BMI	FL	rs56038322	A	G	3	69925128	8.30751e-05	38.3388	57.4967	8.99912e-11	0.5629
BMI	FL	rs56094641	G	A	16	53806453	0.00260248	1204.07	57.4967	1e-200	0.8059
BMI	FL	rs56133507	G	T	2	172818467	5.98935e-05	27.64	57.4967	2.69998e-08	0.641599
BMI	FL	rs56143236	T	C	3	157020444	6.11788e-05	28.2332	57.4967	2.30001e-08	0.1197
BMI	FL	rs56203622	C	T	9	131040874	8.03723e-05	37.0914	57.4967	1.40001e-10	0.9158
BMI	FL	rs56352336	C	T	19	19352155	6.97893e-05	32.2071	57.4967	2.90001e-09	0.6221
BMI	FL	rs56399737	T	C	13	33381721	0.000128781	59.4349	57.4967	6.4003e-16	0.1292
BMI	FL	rs56858768	A	G	13	86511730	0.00010579	48.8228	57.4967	2.39994e-13	0.2588
BMI	FL	rs56893062	G	T	8	25662655	6.61883e-05	30.5452	57.4967	6.19998e-09	0.9726
BMI	FL	rs56930105	T	C	2	10982487	5.95244e-05	27.4697	57.4967	3.69999e-08	0.9746
BMI	FL	rs57636386	C	T	18	58048295	0.000261436	120.673	57.4967	1.10002e-30	0.8329
BMI	FL	rs57989773	C	T	6	100629078	6.59207e-05	30.4216	57.4967	1.6e-08	0.9859
BMI	FL	rs58862095	T	C	7	75081418	0.000257329	118.777	57.4967	2.39994e-30	0.0975911
BMI	FL	rs59068084	T	G	4	113256737	5.9139e-05	27.2918	57.4967	3.79997e-08	0.4243
BMI	FL	rs59227842	G	A	11	43692423	0.000226262	104.434	57.4967	1.50003e-26	0.0955103
BMI	FL	rs6023655	G	A	20	53479658	7.78906e-05	35.946	57.4967	3.59998e-10	0.737199
BMI	FL	rs61740466	A	G	1	19934900	6.61014e-05	30.505	57.4967	5.60003e-09	0.747599
BMI	FL	rs61813324	T	C	1	156049877	0.000197661	91.2303	57.4967	2.80027e-23	0.8536
BMI	FL	rs61828641	A	G	1	174321997	9.81677e-05	45.3047	57.4967	1.20005e-12	0.4939
BMI	FL	rs61871615	T	C	10	102487140	0.000118723	54.792	57.4967	1e-13	0.1444
BMI	FL	rs61903695	G	A	11	89922417	0.000104986	48.4517	57.4967	2.49977e-13	0.7712
BMI	FL	rs61992671	G	A	14	101531854	0.000131065	60.4887	57.4967	5.10035e-15	0.6194
BMI	FL	rs62107261	C	T	2	422144	0.000764323	352.973	57.4967	4.60045e-87	0.9931
BMI	FL	rs62241847	G	A	3	20466465	6.65732e-05	30.7228	57.4967	5.30005e-09	0.6826
BMI	FL	rs62246311	A	G	3	9498143	7.91547e-05	36.5295	57.4967	1.79999e-10	0.1124
BMI	FL	rs62379271	G	T	5	105870033	6.70282e-05	30.9328	57.4967	5e-09	0.2811
BMI	FL	rs6430068	A	G	2	145627927	6.70074e-05	30.9232	57.4967	5.30005e-09	0.1735
BMI	FL	rs6444950	A	G	3	170602073	9.10115e-05	42.0018	57.4967	8.30042e-12	0.6866
BMI	FL	rs6545714	A	G	2	59307725	0.000201906	93.1897	57.4967	2.39994e-24	0.8513
BMI	FL	rs6560906	C	T	12	133414054	6.34399e-05	29.2767	57.4967	1.2e-08	0.5762
BMI	FL	rs6575340	A	G	14	94023972	0.000199024	91.8596	57.4967	8.69961e-24	0.604399
BMI	FL	rs66679256	T	C	4	18351898	0.000109502	50.536	57.4967	6.89922e-14	0.4039
BMI	FL	rs6669341	G	A	1	47678458	0.000141024	65.0858	57.4967	1.59993e-17	0.3836
BMI	FL	rs6707827	G	A	2	100123030	5.94962e-05	27.4566	57.4967	3.89996e-08	0.6959
BMI	FL	rs6725931	T	C	2	220205146	9.42641e-05	43.503	57.4967	3.29989e-12	0.6579
BMI	FL	rs6752979	A	G	2	81741750	6.79005e-05	31.3354	57.4967	3.29997e-09	0.766
BMI	FL	rs67609008	C	T	10	126640936	0.000118632	54.75	57.4967	8.60003e-15	0.5574
BMI	FL	rs6777784	T	G	3	62376645	6.3747e-05	29.4184	57.4967	1e-08	0.8708
BMI	FL	rs6831088	A	G	4	20257769	6.1166e-05	28.2273	57.4967	2.19999e-08	0.912
BMI	FL	rs6843852	T	C	4	162132758	8.56489e-05	39.5268	57.4967	3.50026e-11	0.2748
BMI	FL	rs6909685	T	C	6	97753952	9.39467e-05	43.3565	57.4967	4.70002e-12	0.9852
BMI	FL	rs6922607	G	A	6	142703483	6.81533e-05	31.452	57.4967	3.2e-09	0.728799
BMI	FL	rs6950388	A	G	7	1270699	7.85065e-05	36.2303	57.4967	2.30001e-10	0.1558
BMI	FL	rs698147	G	A	5	3513485	8.19489e-05	37.8191	57.4967	9.60064e-11	0.0428697
BMI	FL	rs7027304	T	C	9	129408290	9.59731e-05	44.2918	57.4967	3.10027e-12	0.7768
BMI	FL	rs7034554	G	A	9	37081301	7.89073e-05	36.4153	57.4967	2.1e-10	0.0584602
BMI	FL	rs7038943	C	T	9	120377178	8.8066e-05	40.6424	57.4967	1.80011e-11	0.595
BMI	FL	rs704061	C	T	12	89771903	0.000106261	49.0402	57.4967	1.69981e-13	0.0487102
BMI	FL	rs7070670	T	C	10	61842645	6.69829e-05	30.9119	57.4967	5.99998e-09	0.9049
BMI	FL	rs7081254	C	T	10	132955696	6.638e-05	30.6336	57.4967	6.19998e-09	0.3805
BMI	FL	rs7124681	A	C	11	47529947	0.000319093	147.295	57.4967	1.50003e-37	0.5
BMI	FL	rs7132908	A	G	12	50263148	0.000420039	193.912	57.4967	1.39991e-48	0.8642
BMI	FL	rs71495038	A	G	10	33971383	0.000109768	50.6588	57.4967	6.70039e-14	0.8591
BMI	FL	rs7201895	A	G	16	407723	0.000102646	47.3715	57.4967	6.00067e-13	0.0913103
BMI	FL	rs7218014	C	T	17	65832016	0.000113775	52.5084	57.4967	2.90001e-14	0.4566
BMI	FL	rs7232171	T	G	18	31251221	7.40632e-05	34.1796	57.4967	8e-10	0.4017
BMI	FL	rs723672	T	C	12	2161561	6.07468e-05	28.0338	57.4967	2.99999e-08	0.0263299
BMI	FL	rs7250833	T	C	19	33937277	7.4922e-05	34.5759	57.4967	6.69993e-10	0.684499
BMI	FL	rs7259070	C	T	19	47562509	0.0002303	106.298	57.4967	6.59933e-27	0.3737
BMI	FL	rs72634826	A	G	1	1601052	0.000174141	80.3729	57.4967	1e-20	0.558
BMI	FL	rs72649373	C	T	4	80609966	7.77973e-05	35.903	57.4967	6.1e-10	0.7991
BMI	FL	rs72892910	T	G	6	50816887	0.000428809	197.962	57.4967	1.50003e-49	0.411
BMI	FL	rs72976986	A	G	19	4050424	0.00016612	76.67	57.4967	7.59976e-20	0.6738
BMI	FL	rs73052033	C	T	3	185828465	0.000278469	128.537	57.4967	7.70016e-33	0.4356
BMI	FL	rs7306534	A	G	12	68107914	5.98006e-05	27.5971	57.4967	4.09996e-08	0.693999
BMI	FL	rs73124396	C	T	7	71579606	7.78174e-05	35.9123	57.4967	3.09999e-10	0.2611
BMI	FL	rs73142879	T	C	20	51195932	0.000221344	102.164	57.4967	3.59998e-26	0.6334
BMI	FL	rs73193736	G	A	12	108294381	0.000115776	53.4319	57.4967	2.19989e-14	0.5083
BMI	FL	rs7331420	A	G	13	99236471	8.42091e-05	38.8623	57.4967	6.59933e-11	0.7511
BMI	FL	rs7357754	G	A	9	92207308	9.9611e-05	45.9709	57.4967	1.10002e-12	0.8079
BMI	FL	rs73601548	T	C	10	18549889	6.37963e-05	29.4412	57.4967	1.29999e-08	0.8617
BMI	FL	rs73985439	C	A	2	212299249	7.94584e-05	36.6697	57.4967	1.7e-10	0.365
BMI	FL	rs745249	T	C	2	105460333	0.000125591	57.9624	57.4967	1.10002e-15	0.8702
BMI	FL	rs7498665	G	A	16	28883241	0.000346321	159.868	57.4967	2.29985e-40	0.4203
BMI	FL	rs7516554	T	C	1	210301331	6.91926e-05	31.9317	57.4967	2.59998e-09	0.1982
BMI	FL	rs7519259	A	G	1	66434743	9.77238e-05	45.0998	57.4967	1.69981e-12	0.3902
BMI	FL	rs7571496	G	A	2	6169351	9.73105e-05	44.9091	57.4967	1.80011e-12	0.5005
BMI	FL	rs76183894	C	T	3	114371939	7.15802e-05	33.0336	57.4967	1.7e-09	0.0642999
BMI	FL	rs7683836	A	G	4	180167906	7.40113e-05	34.1556	57.4967	8.19993e-10	0.8014
BMI	FL	rs7707394	A	G	5	74472939	0.000170233	78.5686	57.4967	8.60003e-21	0.7978
BMI	FL	rs7708584	G	A	5	153543466	0.000124259	57.3474	57.4967	1.39991e-15	0.3561
BMI	FL	rs7762794	G	A	6	153380228	9.06516e-05	41.8357	57.4967	9.09913e-12	0.3172
BMI	FL	rs7774	A	C	17	4801163	9.61807e-05	44.3876	57.4967	3.29989e-12	0.6943
BMI	FL	rs7776021	A	G	6	73742152	6.2703e-05	28.9366	57.4967	1.40001e-08	0.3715
BMI	FL	rs7802342	G	T	7	137435925	6.18641e-05	28.5494	57.4967	1.79999e-08	0.6425
BMI	FL	rs7805441	T	C	7	78121458	8.94395e-05	41.2763	57.4967	1.80011e-11	0.9105
BMI	FL	rs78086698	C	T	12	24024639	7.75355e-05	35.7822	57.4967	3.59998e-10	0.94
BMI	FL	rs784257	C	T	18	53397199	9.79523e-05	45.2053	57.4967	1.99986e-12	0.1044
BMI	FL	rs7893571	T	G	10	16750129	8.79018e-05	40.5665	57.4967	2.29985e-11	0.7196
BMI	FL	rs7924036	T	G	10	65191645	0.000102006	47.0764	57.4967	5.10035e-13	0.543
BMI	FL	rs7925100	A	G	11	118941596	0.000103733	47.8734	57.4967	3.29989e-13	0.358
BMI	FL	rs7944782	G	T	11	130795698	0.000124151	57.2974	57.4967	2.19989e-15	0.9947
BMI	FL	rs7947143	A	G	11	64090422	9.13785e-05	42.1712	57.4967	8.30042e-12	0.3451
BMI	FL	rs79780963	T	C	10	104952499	8.01129e-05	36.9717	57.4967	1.5e-10	0.1651
BMI	FL	rs7996639	A	G	13	97019090	0.00010485	48.389	57.4967	3.59998e-13	0.4648
BMI	FL	rs8015400	A	C	14	25930988	0.000199173	91.9285	57.4967	6.70039e-24	0.5572
BMI	FL	rs8025516	G	T	15	95271872	9.82482e-05	45.3419	57.4967	1.69981e-12	0.3796
BMI	FL	rs8076669	C	T	17	15888448	9.74556e-05	44.9761	57.4967	1.80011e-12	0.4549
BMI	FL	rs8132491	A	G	21	40288577	0.000101667	46.9197	57.4967	2.39994e-12	0.2551
BMI	FL	rs815163	C	T	1	190294726	0.00013371	61.7099	57.4967	1e-16	0.6598
BMI	FL	rs852042	G	A	20	17091233	6.30558e-05	29.0994	57.4967	1.40001e-08	0.708101
BMI	FL	rs879620	T	C	16	4015729	0.000275821	127.315	57.4967	2.29985e-32	0.539699
BMI	FL	rs909892	A	G	20	41982698	7.90704e-05	36.4905	57.4967	2.59998e-10	0.768799
BMI	FL	rs923994	G	A	4	67802992	7.21526e-05	33.2978	57.4967	1.29999e-09	0.5482
BMI	FL	rs9267671	A	G	6	31880480	7.80107e-05	36.0015	57.4967	2.59998e-10	0.6193
BMI	FL	rs9294260	A	G	6	83433228	0.000109014	50.3107	57.4967	1e-13	0.38
BMI	FL	rs9349235	T	C	6	42516718	6.05095e-05	27.9243	57.4967	2.59998e-08	0.6766
BMI	FL	rs935166	A	G	2	26949366	0.000129687	59.853	57.4967	3.19963e-16	0.0157601
BMI	FL	rs9463175	T	C	6	9510030	5.92653e-05	27.3501	57.4967	4.39997e-08	0.2352
BMI	FL	rs9478496	C	T	6	154333183	9.0765e-05	41.888	57.4967	1.10002e-11	0.4846
BMI	FL	rs9522180	T	C	13	111970212	9.8404e-05	45.4138	57.4967	1.50003e-12	0.253
BMI	FL	rs9571687	A	C	13	67472713	8.09753e-05	37.3697	57.4967	1.40001e-10	0.2939
BMI	FL	rs9638713	G	A	7	14645949	6.43621e-05	29.7023	57.4967	1.2e-08	0.3876
BMI	FL	rs9673839	G	A	16	76895693	8.49109e-05	39.1862	57.4967	5.50047e-11	0.560899
BMI	FL	rs9830592	A	C	3	104631603	0.000116633	53.8276	57.4967	1e-14	0.8728
BMI	FL	rs9839081	A	G	3	123051230	6.0093e-05	27.7321	57.4967	4.60002e-08	0.7323
BMI	FL	rs9843653	C	T	3	49920571	0.000433442	200.102	57.4967	2.90001e-50	0.7186
BMI	FL	rs9888533	T	C	13	107854612	7.16277e-05	33.0556	57.4967	2.69998e-09	0.264
BMI	FL	rs9926784	C	T	16	19941968	0.000170765	78.8144	57.4967	8.60003e-21	0.575999
BMI	FL	rs9951619	G	T	18	56882326	7.4271e-05	34.2755	57.4967	9.49992e-10	0.9971
BMI	DLBCL	rs1000096	T	C	4	38692835	8.54756e-05	39.4468	55.2629	5.10035e-11	0.3052
BMI	DLBCL	rs10063055	T	C	5	140990108	7.0778e-05	32.6634	55.2629	1.7e-09	0.5423
BMI	DLBCL	rs10099330	G	A	8	143383694	7.65002e-05	35.3043	55.2629	4.20001e-10	0.7751
BMI	DLBCL	rs10144067	T	C	14	93885198	0.000166739	76.9558	55.2629	5.60015e-20	0.8667
BMI	DLBCL	rs10160769	C	G	11	76474827	8.2693e-05	38.1625	55.2629	1.2e-10	0.710201
BMI	DLBCL	rs10169594	C	T	2	41637688	6.87032e-05	31.7058	55.2629	2.99999e-09	0.867
BMI	DLBCL	rs10172070	T	C	2	208307761	6.51256e-05	30.0547	55.2629	6.69993e-09	0.344
BMI	DLBCL	rs10182416	G	A	2	104242992	8.49413e-05	39.2002	55.2629	3.69999e-11	0.6434
BMI	DLBCL	rs10505836	C	A	12	19288508	8.22752e-05	37.9697	55.2629	1.2e-10	0.0484898
BMI	DLBCL	rs10510025	T	C	10	118650996	0.000114762	52.964	55.2629	2.19989e-14	0.0655496
BMI	DLBCL	rs1064213	A	G	2	198950240	0.000111246	51.3408	55.2629	3.69999e-14	0.0720593
BMI	DLBCL	rs10742752	C	T	11	45438374	6.60883e-05	30.499	55.2629	6.1e-09	0.8803
BMI	DLBCL	rs10756714	G	A	9	15885041	0.000213342	98.4694	55.2629	1.9002e-25	0.1894
BMI	DLBCL	rs10756792	T	C	9	16726119	0.000138747	64.035	55.2629	4.90004e-17	0.859
BMI	DLBCL	rs10760277	T	C	9	126093999	9.11491e-05	42.0653	55.2629	1e-11	0.3121
BMI	DLBCL	rs10780248	A	G	9	81370555	7.2447e-05	33.4337	55.2629	1.2e-09	0.501601
BMI	DLBCL	rs1078141	T	C	8	142619393	9.57024e-05	44.1668	55.2629	4.90004e-12	0.0677798
BMI	DLBCL	rs10809621	G	C	9	11859607	7.14546e-05	32.9756	55.2629	1.40001e-09	0.4571
BMI	DLBCL	rs10824211	T	C	10	76363107	0.000103551	47.7894	55.2629	4.30031e-13	0.4945
BMI	DLBCL	rs10965698	T	C	9	23203619	5.92497e-05	27.3429	55.2629	3.89996e-08	0.7815
BMI	DLBCL	rs10989067	A	G	9	103119634	0.000124203	57.3216	55.2629	1.39991e-15	0.9735
BMI	DLBCL	rs11001963	T	C	10	78760959	6.63993e-05	30.6425	55.2629	7.29995e-09	0.3391
BMI	DLBCL	rs11009685	T	C	10	34511990	6.31682e-05	29.1513	55.2629	1.40001e-08	0.8113
BMI	DLBCL	rs11012732	G	A	10	21830104	0.000207659	95.8458	55.2629	7.10068e-25	0.9494
BMI	DLBCL	rs11079849	T	C	17	47090785	0.000178124	82.2113	55.2629	1.80011e-21	0.0236701
BMI	DLBCL	rs11099020	T	C	4	130724902	9.28965e-05	42.8718	55.2629	5.60015e-12	0.8698
BMI	DLBCL	rs11115160	A	G	12	82424100	6.19883e-05	28.6068	55.2629	2.19999e-08	0.863
BMI	DLBCL	rs11122450	G	T	1	230301811	6.42686e-05	29.6592	55.2629	9.09997e-09	0.9363
BMI	DLBCL	rs11134679	G	A	5	170623391	0.000143729	66.3346	55.2629	1.20005e-17	0.9501
BMI	DLBCL	rs11150745	G	A	17	78757626	0.000194136	89.6032	55.2629	2.90001e-23	0.4391
BMI	DLBCL	rs111598585	T	C	4	171635471	6.68226e-05	30.8379	55.2629	5.39995e-09	0.9529
BMI	DLBCL	rs11165643	T	C	1	96924097	0.000180793	83.4435	55.2629	4.90004e-22	0.1216
BMI	DLBCL	rs111689389	C	G	5	27175962	7.57795e-05	34.9717	55.2629	4.70002e-10	0.7122
BMI	DLBCL	rs11218510	A	G	11	121922587	0.000100425	46.3468	55.2629	8.4004e-13	0.9011
BMI	DLBCL	rs1126930	C	G	12	49399132	7.08659e-05	32.704	55.2629	1.7e-09	0.2211
BMI	DLBCL	rs113079574	T	C	4	147354089	7.56434e-05	34.9089	55.2629	5.80003e-10	0.7348
BMI	DLBCL	rs113603865	T	C	1	39564930	0.000115625	53.3625	55.2629	1.80011e-14	0.8489
BMI	DLBCL	rs113624107	A	G	14	88326386	7.91656e-05	36.5345	55.2629	2.1e-10	0.06047
BMI	DLBCL	rs115056380	A	G	1	111338672	6.05072e-05	27.9232	55.2629	2.5e-08	0.9725
BMI	DLBCL	rs11525873	C	T	7	138817193	0.00010137	46.7827	55.2629	6.59933e-13	0.317
BMI	DLBCL	rs11607476	C	A	11	115037061	0.000123344	56.9253	55.2629	3.10027e-15	0.726501
BMI	DLBCL	rs11610621	A	T	12	121671133	6.86169e-05	31.666	55.2629	3.09999e-09	0.7224
BMI	DLBCL	rs11630647	A	G	15	99240947	6.05147e-05	27.9267	55.2629	2.69998e-08	0.1996
BMI	DLBCL	rs116374395	A	G	5	50723410	6.94997e-05	32.0734	55.2629	2.80001e-09	0.8373
BMI	DLBCL	rs11641179	G	A	16	6716711	6.01347e-05	27.7513	55.2629	3.40001e-08	0.715899
BMI	DLBCL	rs11642090	C	T	16	81730582	6.10196e-05	28.1597	55.2629	2.90001e-08	0.542199
BMI	DLBCL	rs11656076	A	G	17	31464270	8.29568e-05	38.2842	55.2629	7.59976e-11	0.3114
BMI	DLBCL	rs1167311	A	G	1	49996959	0.000161167	74.384	55.2629	1.59993e-19	0.6624
BMI	DLBCL	rs11675464	G	A	2	204053742	7.05636e-05	32.5644	55.2629	1.6e-09	0.669599
BMI	DLBCL	rs11691869	A	C	2	100805996	0.000172347	79.5447	55.2629	5.60015e-21	0.768399
BMI	DLBCL	rs11699828	A	G	20	62157198	7.77368e-05	35.875	55.2629	8.60003e-09	0.6255
BMI	DLBCL	rs11709402	G	A	3	131551027	0.00020937	96.6357	55.2629	4.90004e-25	0.6205
BMI	DLBCL	rs117118217	C	G	10	131783328	6.98922e-05	32.2546	55.2629	1.29999e-08	0.2643
BMI	DLBCL	rs117342986	T	C	16	54267868	6.88221e-05	31.7607	55.2629	1.6e-08	0.8298
BMI	DLBCL	rs11757278	C	T	6	13180454	9.05149e-05	41.7726	55.2629	9.8992e-12	0.6607
BMI	DLBCL	rs11778219	G	A	8	87762607	6.81241e-05	31.4386	55.2629	4.20001e-09	0.1075
BMI	DLBCL	rs118136827	T	G	17	2168104	7.1042e-05	32.7852	55.2629	1.7e-09	0.732799
BMI	DLBCL	rs11842871	T	G	13	31042452	8.70636e-05	40.1797	55.2629	2.80027e-11	0.02093
BMI	DLBCL	rs12001437	C	T	9	34074476	6.90219e-05	31.8529	55.2629	2.80001e-09	0.5807
BMI	DLBCL	rs12072739	G	A	1	98315893	8.58305e-05	39.6106	55.2629	3.29989e-11	0.7996
BMI	DLBCL	rs12088284	T	C	1	80798635	8.16486e-05	37.6805	55.2629	8.9002e-11	1
BMI	DLBCL	rs12089815	A	G	1	91189933	7.50775e-05	34.6477	55.2629	5.69994e-10	0.7392
BMI	DLBCL	rs12140153	T	G	1	62579891	0.000186779	86.2067	55.2629	1.20005e-21	0.8566
BMI	DLBCL	rs12149660	A	G	16	70309237	0.000105165	48.5343	55.2629	2.99985e-13	0.3469
BMI	DLBCL	rs12259464	A	G	10	53680099	8.55849e-05	39.4972	55.2629	4.49987e-11	0.4457
BMI	DLBCL	rs12273545	T	C	11	116911012	6.57863e-05	30.3596	55.2629	6.80002e-09	0.89
BMI	DLBCL	rs1229984	C	T	4	100239319	7.39187e-05	34.1129	55.2629	4.60002e-10	0.754699
BMI	DLBCL	rs12364470	G	T	11	134601012	0.000102105	47.122	55.2629	4.90004e-13	0.6762
BMI	DLBCL	rs12440603	T	C	15	46585722	9.52956e-05	43.9791	55.2629	3.40017e-12	0.0714496
BMI	DLBCL	rs12459368	G	A	19	18459377	0.000113632	52.4425	55.2629	2.49977e-14	0.4667
BMI	DLBCL	rs12462975	A	G	19	30272202	0.000169487	78.2243	55.2629	2.60016e-20	0.4788
BMI	DLBCL	rs12541408	C	T	8	95585807	8.89352e-05	41.0435	55.2629	1.59993e-11	0.4522
BMI	DLBCL	rs1266874	G	A	6	51779638	9.03694e-05	41.7055	55.2629	1e-11	0.3231
BMI	DLBCL	rs12681792	A	C	8	62054463	6.87632e-05	31.7335	55.2629	3.50002e-09	0.8983
BMI	DLBCL	rs12692596	T	C	2	161265910	8.00119e-05	36.9251	55.2629	1.29999e-10	0.9068
BMI	DLBCL	rs12696039	G	A	3	156304750	5.93439e-05	27.3863	55.2629	3.50002e-08	0.6108
BMI	DLBCL	rs1286058	A	T	14	91458523	9.27291e-05	42.7946	55.2629	6.20012e-12	0.1659
BMI	DLBCL	rs12881629	G	A	14	101146413	7.38927e-05	34.1009	55.2629	7.69999e-10	0.9822
BMI	DLBCL	rs12889639	A	G	14	103860206	0.000109604	50.5833	55.2629	7.70016e-14	0.4772
BMI	DLBCL	rs12921986	G	A	16	72312727	5.94517e-05	27.4361	55.2629	3.79997e-08	0.3661
BMI	DLBCL	rs12937411	T	C	17	34950239	0.000142714	65.866	55.2629	1.39991e-17	0.3051
BMI	DLBCL	rs1296328	C	A	4	137083193	0.000175408	80.9576	55.2629	3.90032e-21	0.4777
BMI	DLBCL	rs12974458	T	C	19	1866115	0.000115363	53.2412	55.2629	2.29985e-14	0.9941
BMI	DLBCL	rs13012070	A	G	2	35447243	6.5671e-05	30.3064	55.2629	6.1e-09	0.793601
BMI	DLBCL	rs13033310	A	G	2	133523605	6.00755e-05	27.724	55.2629	3.29997e-08	0.3689
BMI	DLBCL	rs13097918	A	T	3	35676330	7.08685e-05	32.7052	55.2629	1.7e-09	0.4837
BMI	DLBCL	rs13107325	T	C	4	103188709	0.000313801	144.851	55.2629	8.49963e-37	0.9376
BMI	DLBCL	rs13176429	C	T	5	43152216	8.60836e-05	39.7274	55.2629	3.10027e-11	0.1369
BMI	DLBCL	rs1320251	T	C	17	21264396	0.000161249	74.4217	55.2629	1.50003e-19	0.5541
BMI	DLBCL	rs1322842	G	A	6	20488897	8.20713e-05	37.8756	55.2629	1.09999e-10	0.1647
BMI	DLBCL	rs13248187	C	T	8	14336834	9.76292e-05	45.0562	55.2629	1.99986e-12	0.3755
BMI	DLBCL	rs1327259	G	A	6	51177811	0.000104746	48.3411	55.2629	2.80027e-13	0.4248
BMI	DLBCL	rs13291723	A	G	9	80510077	5.96343e-05	27.5203	55.2629	3.40001e-08	0.1557
BMI	DLBCL	rs1330199	T	G	9	27760946	6.89633e-05	31.8259	55.2629	3.29997e-09	0.3279
BMI	DLBCL	rs13420048	A	C	2	50751414	0.00011111	51.2782	55.2629	4.60045e-14	0.8747
BMI	DLBCL	rs13427822	G	A	2	213414265	0.000130242	60.109	55.2629	5.60015e-16	0.0280602
BMI	DLBCL	rs1346841	A	G	4	65651730	8.21554e-05	37.9144	55.2629	9.70063e-11	0.741899
BMI	DLBCL	rs1360201	T	C	9	73796450	8.44823e-05	38.9883	55.2629	4.79954e-11	0.99
BMI	DLBCL	rs13642	T	A	11	30432220	0.000120078	55.4178	55.2629	4.30031e-15	0.6952
BMI	DLBCL	rs140159717	T	C	15	73765586	9.206e-05	42.4857	55.2629	2.80027e-11	0.7193
BMI	DLBCL	rs1438945	A	T	5	152510937	7.29692e-05	33.6747	55.2629	1.09999e-09	0.4365
BMI	DLBCL	rs1441264	A	G	13	79580919	0.000154638	71.37	55.2629	3.40017e-18	0.0144202
BMI	DLBCL	rs1451963	T	G	14	41350367	7.44239e-05	34.346	55.2629	7.39997e-10	0.8015
BMI	DLBCL	rs1458156	T	C	12	41887940	9.89998e-05	45.6888	55.2629	1.20005e-12	0.1723
BMI	DLBCL	rs145981104	G	A	8	74714869	6.15357e-05	28.3979	55.2629	2e-08	0.9737
BMI	DLBCL	rs146569428	A	G	11	2199686	6.2477e-05	28.8323	55.2629	2e-08	0.4041
BMI	DLBCL	rs1471093	A	G	3	108031094	8.56784e-05	39.5404	55.2629	4.10015e-11	0.00471303
BMI	DLBCL	rs147568678	C	T	10	93061851	6.4489e-05	29.7609	55.2629	1.09999e-08	0.5092
BMI	DLBCL	rs1477290	C	T	5	87988934	0.000269692	124.485	55.2629	2.19989e-31	0.9074
BMI	DLBCL	rs147730268	T	G	12	123024476	0.000195989	90.4586	55.2629	1.29987e-22	0.8872
BMI	DLBCL	rs1503526	C	T	5	63020706	0.000118866	54.8581	55.2629	5.90065e-15	0.8522
BMI	DLBCL	rs156201	C	G	6	104847441	6.46348e-05	29.8282	55.2629	8.30004e-09	0.4243
BMI	DLBCL	rs156914	A	G	1	16848652	6.22025e-05	28.7056	55.2629	1.6e-08	0.9659
BMI	DLBCL	rs1582931	A	G	5	122657199	8.87482e-05	40.9572	55.2629	2.29985e-11	0.1405
BMI	DLBCL	rs159037	C	T	5	94197477	5.7987e-05	26.7601	55.2629	4.90004e-08	0.0927705
BMI	DLBCL	rs1609010	G	A	8	77227464	0.000216221	99.7987	55.2629	7.89951e-26	0.1047
BMI	DLBCL	rs1657930	A	G	15	57120989	6.8234e-05	31.4893	55.2629	3.50002e-09	0.2519
BMI	DLBCL	rs16916303	G	A	9	30823761	7.80078e-05	36.0001	55.2629	4.20001e-10	0.1235
BMI	DLBCL	rs17056301	C	T	5	158271680	7.03579e-05	32.4695	55.2629	2.19999e-09	0.5045
BMI	DLBCL	rs17132130	C	G	7	2108036	0.000109772	50.6609	55.2629	7.50067e-14	0.8762
BMI	DLBCL	rs17218879	G	C	9	14768540	7.17379e-05	33.1064	55.2629	1.6e-09	0.9952
BMI	DLBCL	rs17289010	G	A	4	140774684	7.99224e-05	36.8838	55.2629	1.6e-10	0.01646
BMI	DLBCL	rs17399739	G	A	10	87490850	9.40206e-05	43.3906	55.2629	4.40048e-12	0.6541
BMI	DLBCL	rs17446299	G	C	13	40762556	6.48728e-05	29.938	55.2629	8.9e-09	0.1904
BMI	DLBCL	rs17544384	C	T	1	115295160	6.60994e-05	30.5041	55.2629	5.30005e-09	0.562501
BMI	DLBCL	rs17770336	T	C	9	28414625	0.000257864	119.024	55.2629	1.29987e-30	0.580899
BMI	DLBCL	rs1778830	A	G	1	156489974	9.15579e-05	42.254	55.2629	7.50067e-12	0.0926595
BMI	DLBCL	rs1793636	C	G	11	131934926	7.59484e-05	35.0497	55.2629	4.70002e-10	0.9126
BMI	DLBCL	rs1834144	A	C	18	40744790	9.18433e-05	42.3857	55.2629	8.60003e-12	0.827
BMI	DLBCL	rs1861410	T	C	2	58933591	0.000223129	102.988	55.2629	1.20005e-26	0.0520104
BMI	DLBCL	rs1884897	G	A	20	6612832	0.000187039	86.3266	55.2629	2.29985e-22	0.8857
BMI	DLBCL	rs1919243	C	T	5	88778861	6.81201e-05	31.4367	55.2629	5.49997e-09	0.2862
BMI	DLBCL	rs2035936	T	G	3	141298124	0.000145154	66.9921	55.2629	1.69981e-17	0.145
BMI	DLBCL	rs2051559	C	T	4	3298800	9.57676e-05	44.197	55.2629	2.80027e-12	0.0948309
BMI	DLBCL	rs2075466	C	G	16	4872970	6.91676e-05	31.9202	55.2629	2.80001e-09	0.565599
BMI	DLBCL	rs2102278	G	A	4	52818664	6.14475e-05	28.3572	55.2629	2e-08	0.0707799
BMI	DLBCL	rs2133561	T	A	5	139086651	9.44583e-05	43.5927	55.2629	5.79963e-12	0.2078
BMI	DLBCL	rs213518	C	T	7	26941065	6.20303e-05	28.6261	55.2629	1.79999e-08	0.692901
BMI	DLBCL	rs2153740	G	A	20	2126089	6.32364e-05	29.1828	55.2629	1.6e-08	0.7388
BMI	DLBCL	rs215634	G	A	7	32369148	0.000114439	52.8149	55.2629	2.39994e-14	0.4832
BMI	DLBCL	rs2172131	C	T	10	133978962	0.000108809	50.2163	55.2629	8.99912e-14	0.8384
BMI	DLBCL	rs2192158	G	A	4	55505360	0.000111399	51.4118	55.2629	3.69999e-14	0.6524
BMI	DLBCL	rs2216931	A	C	2	181599070	0.000127985	59.0673	55.2629	5.19996e-16	0.6093
BMI	DLBCL	rs2234458	T	C	11	65639374	0.000191579	88.4228	55.2629	3.59998e-23	0.5145
BMI	DLBCL	rs2248551	A	G	6	131924689	5.90202e-05	27.2369	55.2629	3.79997e-08	0.8337
BMI	DLBCL	rs2271189	A	G	12	56494991	0.000127951	59.0517	55.2629	6.4998e-16	0.802
BMI	DLBCL	rs2289379	T	C	7	44804225	0.000111603	51.5059	55.2629	5.19996e-14	0.1461
BMI	DLBCL	rs2307111	C	T	5	75003678	0.000374833	173.035	55.2629	1.29987e-43	0.8535
BMI	DLBCL	rs2342892	G	T	16	24540806	8.05247e-05	37.1618	55.2629	1.29999e-10	0.7617
BMI	DLBCL	rs2381404	C	T	2	144035442	7.19306e-05	33.1954	55.2629	1.29999e-09	0.4241
BMI	DLBCL	rs2383377	A	G	14	33257914	5.91068e-05	27.2769	55.2629	3.89996e-08	0.2405
BMI	DLBCL	rs2398861	G	A	9	96430747	0.000124322	57.3766	55.2629	2.09991e-15	0.8078
BMI	DLBCL	rs2425816	A	G	20	44895075	7.26118e-05	33.5097	55.2629	1.2e-09	0.3716
BMI	DLBCL	rs2433733	A	G	2	230816703	0.000128952	59.5136	55.2629	3.80014e-16	0.2164
BMI	DLBCL	rs2439823	G	A	10	99778226	0.000182782	84.3618	55.2629	5.30029e-22	0.3854
BMI	DLBCL	rs2482356	C	T	9	94178371	6.31254e-05	29.1315	55.2629	1.29999e-08	0.5727
BMI	DLBCL	rs2512892	C	T	11	131451862	8.23457e-05	38.0022	55.2629	9.20026e-11	0.9263
BMI	DLBCL	rs252761	T	G	5	77380723	6.41296e-05	29.595	55.2629	1.2e-08	0.2579
BMI	DLBCL	rs2569993	C	T	3	12926096	6.98999e-05	32.2581	55.2629	2.39999e-09	0.731799
BMI	DLBCL	rs2606228	C	A	3	183537759	8.80611e-05	40.6401	55.2629	2.70023e-11	0.9725
BMI	DLBCL	rs2616143	A	G	8	20632022	8.37492e-05	38.65	55.2629	6.70039e-11	0.577
BMI	DLBCL	rs2678204	G	T	1	201800511	0.000262049	120.956	55.2629	3.80014e-31	0.609901
BMI	DLBCL	rs2725371	G	A	8	30854033	0.000108716	50.1732	55.2629	1.10002e-13	0.3848
BMI	DLBCL	rs2791643	T	C	1	11207269	6.50089e-05	30.0008	55.2629	7.19996e-09	0.9863
BMI	DLBCL	rs2814942	A	G	6	34644261	0.000358552	165.516	55.2629	5.30029e-42	0.3884
BMI	DLBCL	rs28350	G	A	3	42418446	9.57161e-05	44.1732	55.2629	2.90001e-12	0.5881
BMI	DLBCL	rs28366156	C	T	6	31671498	0.000159258	73.5024	55.2629	1.59993e-19	0.3227
BMI	DLBCL	rs2837996	C	T	21	42626706	7.28434e-05	33.6166	55.2629	1.09999e-09	0.5279
BMI	DLBCL	rs28404639	T	C	5	80874229	6.36722e-05	29.3839	55.2629	1.2e-08	0.478
BMI	DLBCL	rs28489620	A	G	22	41804716	9.73984e-05	44.9497	55.2629	2.80027e-12	0.8396
BMI	DLBCL	rs28568418	A	G	15	53462969	6.42097e-05	29.632	55.2629	1.2e-08	0.9308
BMI	DLBCL	rs2861685	C	T	2	67837553	0.000142129	65.5958	55.2629	1e-17	0.758501
BMI	DLBCL	rs28670671	C	T	9	140363045	6.34479e-05	29.2804	55.2629	3.69999e-08	0.1489
BMI	DLBCL	rs2870111	T	C	15	79403585	0.000119663	55.226	55.2629	7.10068e-15	0.04023
BMI	DLBCL	rs2875762	C	G	6	124925032	8.65504e-05	39.9428	55.2629	3.29989e-11	0.6916
BMI	DLBCL	rs2899644	T	C	15	59470366	7.93319e-05	36.6112	55.2629	2.30001e-10	0.782299
BMI	DLBCL	rs2920503	T	C	3	12324230	8.03004e-05	37.0582	55.2629	1.7e-10	0.9691
BMI	DLBCL	rs2922757	T	A	8	76544012	7.21447e-05	33.2941	55.2629	1.29999e-09	0.0711394
BMI	DLBCL	rs2962334	T	G	5	86879056	7.35772e-05	33.9553	55.2629	7.79992e-10	0.3036
BMI	DLBCL	rs317656	A	T	12	69681101	8.36666e-05	38.6118	55.2629	6.09958e-11	0.5039
BMI	DLBCL	rs3213943	A	C	2	136389840	7.35308e-05	33.9339	55.2629	4.79999e-10	0.2249
BMI	DLBCL	rs32421	T	A	5	167362416	6.09245e-05	28.1158	55.2629	2.59998e-08	0.2273
BMI	DLBCL	rs329118	T	C	5	133861663	0.000133771	61.7379	55.2629	1.29987e-16	0.8673
BMI	DLBCL	rs329651	T	G	11	133767622	7.79086e-05	35.9543	55.2629	3.29997e-10	0.3214
BMI	DLBCL	rs34045288	T	C	6	40369081	0.000245397	113.268	55.2629	3.50026e-29	0.1199
BMI	DLBCL	rs34153025	C	T	15	41339697	6.56244e-05	30.2849	55.2629	9.59997e-09	0.9033
BMI	DLBCL	rs34234296	A	G	2	175166636	0.000106537	49.1675	55.2629	2.39994e-13	0.1338
BMI	DLBCL	rs34481751	A	C	20	47501038	9.44874e-05	43.6061	55.2629	7.8001e-12	0.00892195
BMI	DLBCL	rs34696181	C	T	7	93096635	6.52243e-05	30.1003	55.2629	8.10009e-09	0.0136101
BMI	DLBCL	rs34811474	A	G	4	25408838	0.000288954	133.379	55.2629	4.10015e-34	0.0900803
BMI	DLBCL	rs349071	A	G	11	84776849	8.85274e-05	40.8553	55.2629	1.9002e-11	0.722099
BMI	DLBCL	rs35154326	G	A	16	24862414	6.76855e-05	31.2361	55.2629	5.30005e-09	0.6502
BMI	DLBCL	rs35364449	T	C	15	74278126	9.2067e-05	42.489	55.2629	9.20026e-12	0.4652
BMI	DLBCL	rs35697587	A	G	14	47298505	0.000135557	62.5623	55.2629	9.20026e-17	0.9581
BMI	DLBCL	rs35809007	A	G	2	47019521	0.000135276	62.4324	55.2629	9.09913e-17	0.2281
BMI	DLBCL	rs35957544	T	G	8	73440371	0.00018866	87.075	55.2629	1.10002e-22	0.5362
BMI	DLBCL	rs36007635	A	G	6	163009335	0.000105176	48.5392	55.2629	2.19989e-13	0.5748
BMI	DLBCL	rs36061954	T	C	8	38329650	7.91078e-05	36.5078	55.2629	2e-10	0.1518
BMI	DLBCL	rs3764625	G	T	19	49649051	6.71566e-05	30.992	55.2629	5.19996e-09	0.5295
BMI	DLBCL	rs3784710	C	T	15	68072458	0.000309318	142.782	55.2629	2.49977e-36	0.2068
BMI	DLBCL	rs3803286	G	A	14	103246470	0.000154416	71.2674	55.2629	6.4003e-19	0.2543
BMI	DLBCL	rs3807566	T	G	7	50564204	7.17661e-05	33.1194	55.2629	1.5e-09	0.5088
BMI	DLBCL	rs3814883	T	C	16	29994922	0.0002879	132.892	55.2629	1e-33	0.1048
BMI	DLBCL	rs3845344	T	C	1	75001480	0.000127492	58.8399	55.2629	5.40008e-16	0.2245
BMI	DLBCL	rs3851998	G	C	3	131876605	7.06988e-05	32.6269	55.2629	2e-09	0.3969
BMI	DLBCL	rs3866805	A	C	1	6657424	6.36416e-05	29.3698	55.2629	1.2e-08	0.9537
BMI	DLBCL	rs3897102	T	C	12	123492112	7.0704e-05	32.6293	55.2629	2.5e-09	0.0318897
BMI	DLBCL	rs3901286	A	C	7	99107727	0.000131461	60.6717	55.2629	2.70023e-16	0.0621599
BMI	DLBCL	rs3935190	A	G	17	79084367	0.00010436	48.1628	55.2629	4.00037e-13	0.4417
BMI	DLBCL	rs394608	C	T	21	46581798	0.00017265	79.6846	55.2629	9.49948e-21	0.8076
BMI	DLBCL	rs40071	C	T	5	107496102	0.000201714	93.1012	55.2629	3.80014e-24	0.8031
BMI	DLBCL	rs4017425	T	C	3	44028764	7.88686e-05	36.3974	55.2629	2.1e-10	0.8251
BMI	DLBCL	rs4055791	T	C	13	59266053	0.000154176	71.1567	55.2629	7.39946e-19	0.5235
BMI	DLBCL	rs406388	G	C	22	18226997	7.44197e-05	34.3441	55.2629	8.30004e-10	0.3872
BMI	DLBCL	rs41279738	G	T	1	110082551	0.000237035	109.408	55.2629	4.00037e-28	0.6962
BMI	DLBCL	rs4148155	G	A	4	89054667	0.000105969	48.9055	55.2629	1.39991e-13	0.4684
BMI	DLBCL	rs4261944	G	T	4	31003636	8.89806e-05	41.0645	55.2629	1.59993e-11	0.685001
BMI	DLBCL	rs4267103	C	T	12	60966740	7.18388e-05	33.153	55.2629	1.40001e-09	0.3632
BMI	DLBCL	rs4284600	C	T	15	31843528	7.12985e-05	32.9036	55.2629	2e-09	0.2812
BMI	DLBCL	rs429343	G	A	2	147903382	0.000147481	68.0665	55.2629	3.29989e-18	0.0287799
BMI	DLBCL	rs429358	C	T	19	45411941	0.000185534	85.6323	55.2629	2.39994e-22	0.0104201
BMI	DLBCL	rs4307239	G	A	7	24354300	7.32086e-05	33.7851	55.2629	1e-09	0.6389
BMI	DLBCL	rs4444317	G	A	15	92573234	8.84931e-05	40.8395	55.2629	2.49977e-11	0.5039
BMI	DLBCL	rs4456769	T	C	20	25190777	9.48976e-05	43.7954	55.2629	3.59998e-12	0.7127
BMI	DLBCL	rs4477562	T	C	13	54104968	0.000196582	90.7324	55.2629	2.90001e-23	0.851
BMI	DLBCL	rs4482463	A	C	2	205375909	0.000139408	64.3397	55.2629	2.99985e-17	0.657099
BMI	DLBCL	rs45486197	A	G	19	2244849	8.14861e-05	37.6055	55.2629	1.7e-10	0.674401
BMI	DLBCL	rs4605363	C	A	2	229010960	0.000120449	55.5888	55.2629	3.29989e-15	0.8467
BMI	DLBCL	rs4648450	A	C	1	2723214	0.000109584	50.5738	55.2629	8.4004e-14	0.3403
BMI	DLBCL	rs4658403	T	C	1	243832560	9.89409e-05	45.6616	55.2629	1e-12	0.2888
BMI	DLBCL	rs4672338	T	C	2	60217457	8.2129e-05	37.9022	55.2629	8.00018e-11	0.4113
BMI	DLBCL	rs4722398	T	C	7	3125220	8.22435e-05	37.9551	55.2629	7.89951e-11	0.369
BMI	DLBCL	rs4764949	G	A	12	103658096	0.000148631	68.5973	55.2629	3.10027e-18	0.668099
BMI	DLBCL	rs4790292	A	C	17	1824305	0.000168507	77.7721	55.2629	2.60016e-20	0.4137
BMI	DLBCL	rs4820410	G	A	22	40690385	0.000142385	65.7142	55.2629	1.69981e-17	0.2033
BMI	DLBCL	rs4832298	T	C	2	86764004	0.000109778	50.6635	55.2629	5.40008e-14	0.9495
BMI	DLBCL	rs4858940	C	T	3	88254820	0.000106545	49.1712	55.2629	1.39991e-13	0.1499
BMI	DLBCL	rs4876611	G	A	8	116671848	0.000157268	72.5839	55.2629	3.29989e-19	0.3085
BMI	DLBCL	rs4929923	C	T	11	8639200	0.000164277	75.8192	55.2629	4.49987e-20	0.6494
BMI	DLBCL	rs5011579	G	C	16	69187318	8.01602e-05	36.9935	55.2629	1.6e-10	0.3104
BMI	DLBCL	rs512121	C	T	18	7548501	7.88114e-05	36.371	55.2629	2.59998e-10	0.7994
BMI	DLBCL	rs529200	G	A	3	173114305	0.000142304	65.6765	55.2629	1.29987e-17	0.0750896
BMI	DLBCL	rs539515	C	A	1	177889025	0.00079943	369.199	55.2629	1.99986e-91	0.9344
BMI	DLBCL	rs55707359	G	T	11	46159333	8.57757e-05	39.5853	55.2629	6.20012e-11	0.4547
BMI	DLBCL	rs55714539	C	A	19	18207397	0.000139278	64.2797	55.2629	6.00067e-17	0.0201902
BMI	DLBCL	rs55726687	A	G	12	991306	0.000204356	94.321	55.2629	1.39991e-24	0.0596994
BMI	DLBCL	rs55769038	A	G	11	13331808	0.000125309	57.8322	55.2629	1.20005e-15	0.0885605
BMI	DLBCL	rs558887	G	A	11	28712741	7.19493e-05	33.204	55.2629	1.5e-09	0.04976
BMI	DLBCL	rs559231	T	G	18	39644247	8.68362e-05	40.0747	55.2629	3.40017e-11	0.0679501
BMI	DLBCL	rs55966114	T	C	12	97584357	6.62842e-05	30.5894	55.2629	6.49995e-09	0.4632
BMI	DLBCL	rs56038322	A	G	3	69925128	8.30751e-05	38.3388	55.2629	8.99912e-11	0.1447
BMI	DLBCL	rs56094641	G	A	16	53806453	0.00260248	1204.07	55.2629	1e-200	0.1737
BMI	DLBCL	rs56133507	G	T	2	172818467	5.98935e-05	27.64	55.2629	2.69998e-08	0.776301
BMI	DLBCL	rs56143236	T	C	3	157020444	6.11788e-05	28.2332	55.2629	2.30001e-08	0.0705505
BMI	DLBCL	rs56161855	T	A	17	46288649	0.000116198	53.6269	55.2629	1.39991e-14	0.1357
BMI	DLBCL	rs56203622	C	T	9	131040874	8.03723e-05	37.0914	55.2629	1.40001e-10	0.2445
BMI	DLBCL	rs56352336	C	T	19	19352155	6.97893e-05	32.2071	55.2629	2.90001e-09	0.5006
BMI	DLBCL	rs56399737	T	C	13	33381721	0.000128781	59.4349	55.2629	6.4003e-16	0.9962
BMI	DLBCL	rs56858768	A	G	13	86511730	0.00010579	48.8228	55.2629	2.39994e-13	0.2659
BMI	DLBCL	rs56893062	G	T	8	25662655	6.61883e-05	30.5452	55.2629	6.19998e-09	0.5036
BMI	DLBCL	rs56930105	T	C	2	10982487	5.95244e-05	27.4697	55.2629	3.69999e-08	0.1216
BMI	DLBCL	rs57636386	C	T	18	58048295	0.000261436	120.673	55.2629	1.10002e-30	0.704399
BMI	DLBCL	rs57989773	C	T	6	100629078	6.59207e-05	30.4216	55.2629	1.6e-08	0.0612407
BMI	DLBCL	rs58862095	T	C	7	75081418	0.000257329	118.777	55.2629	2.39994e-30	0.4959
BMI	DLBCL	rs59068084	T	G	4	113256737	5.9139e-05	27.2918	55.2629	3.79997e-08	0.2429
BMI	DLBCL	rs59227842	G	A	11	43692423	0.000226262	104.434	55.2629	1.50003e-26	0.2944
BMI	DLBCL	rs6023655	G	A	20	53479658	7.78906e-05	35.946	55.2629	3.59998e-10	0.5182
BMI	DLBCL	rs60764613	T	G	18	1839911	0.000109169	50.3822	55.2629	1.10002e-13	0.2145
BMI	DLBCL	rs61740466	A	G	1	19934900	6.61014e-05	30.505	55.2629	5.60003e-09	0.9688
BMI	DLBCL	rs61813324	T	C	1	156049877	0.000197661	91.2303	55.2629	2.80027e-23	0.00585006
BMI	DLBCL	rs61828641	A	G	1	174321997	9.81677e-05	45.3047	55.2629	1.20005e-12	0.3814
BMI	DLBCL	rs61871615	T	C	10	102487140	0.000118723	54.792	55.2629	1e-13	0.9254
BMI	DLBCL	rs61903695	G	A	11	89922417	0.000104986	48.4517	55.2629	2.49977e-13	0.9534
BMI	DLBCL	rs61992671	G	A	14	101531854	0.000131065	60.4887	55.2629	5.10035e-15	0.0524397
BMI	DLBCL	rs62020775	A	T	15	89960286	6.67497e-05	30.8042	55.2629	7.19996e-09	0.8071
BMI	DLBCL	rs62107261	C	T	2	422144	0.000764323	352.973	55.2629	4.60045e-87	0.8256
BMI	DLBCL	rs62176243	T	A	2	166190881	8.2902e-05	38.259	55.2629	6.09958e-11	0.2733
BMI	DLBCL	rs62190049	C	G	2	182566998	5.94937e-05	27.4555	55.2629	4e-08	0.0386803
BMI	DLBCL	rs62241847	G	A	3	20466465	6.65732e-05	30.7228	55.2629	5.30005e-09	0.0450101
BMI	DLBCL	rs62246311	A	G	3	9498143	7.91547e-05	36.5295	55.2629	1.79999e-10	0.2093
BMI	DLBCL	rs62379271	G	T	5	105870033	6.70282e-05	30.9328	55.2629	5e-09	0.111
BMI	DLBCL	rs62407562	A	T	6	33530346	8.19156e-05	37.8037	55.2629	8.49963e-11	0.772899
BMI	DLBCL	rs6265	T	C	11	27679916	0.000487449	225.047	55.2629	3.29989e-56	0.731601
BMI	DLBCL	rs6430068	A	G	2	145627927	6.70074e-05	30.9232	55.2629	5.30005e-09	0.08628
BMI	DLBCL	rs6444950	A	G	3	170602073	9.10115e-05	42.0018	55.2629	8.30042e-12	0.553701
BMI	DLBCL	rs6545714	A	G	2	59307725	0.000201906	93.1897	55.2629	2.39994e-24	0.764599
BMI	DLBCL	rs6560906	C	T	12	133414054	6.34399e-05	29.2767	55.2629	1.2e-08	0.2064
BMI	DLBCL	rs6575340	A	G	14	94023972	0.000199024	91.8596	55.2629	8.69961e-24	0.679599
BMI	DLBCL	rs66679256	T	C	4	18351898	0.000109502	50.536	55.2629	6.89922e-14	0.9983
BMI	DLBCL	rs6669341	G	A	1	47678458	0.000141024	65.0858	55.2629	1.59993e-17	0.567799
BMI	DLBCL	rs6682438	C	T	1	33784146	7.62003e-05	35.1659	55.2629	3.69999e-10	0.2118
BMI	DLBCL	rs6707827	G	A	2	100123030	5.94962e-05	27.4566	55.2629	3.89996e-08	0.0264899
BMI	DLBCL	rs6710091	G	C	2	239597	6.19589e-05	28.5932	55.2629	1.6e-08	0.0644703
BMI	DLBCL	rs6713781	C	G	2	40291940	8.85738e-05	40.8767	55.2629	2.19989e-11	0.4272
BMI	DLBCL	rs6725931	T	C	2	220205146	9.42641e-05	43.503	55.2629	3.29989e-12	0.2875
BMI	DLBCL	rs6752979	A	G	2	81741750	6.79005e-05	31.3354	55.2629	3.29997e-09	0.3978
BMI	DLBCL	rs67609008	C	T	10	126640936	0.000118632	54.75	55.2629	8.60003e-15	0.1814
BMI	DLBCL	rs6774894	A	T	3	196116393	8.14339e-05	37.5814	55.2629	9.70063e-11	0.2029
BMI	DLBCL	rs6777784	T	G	3	62376645	6.3747e-05	29.4184	55.2629	1e-08	0.8947
BMI	DLBCL	rs6831088	A	G	4	20257769	6.1166e-05	28.2273	55.2629	2.19999e-08	0.4947
BMI	DLBCL	rs6843852	T	C	4	162132758	8.56489e-05	39.5268	55.2629	3.50026e-11	0.3641
BMI	DLBCL	rs6909685	T	C	6	97753952	9.39467e-05	43.3565	55.2629	4.70002e-12	0.9066
BMI	DLBCL	rs6922607	G	A	6	142703483	6.81533e-05	31.452	55.2629	3.2e-09	0.2342
BMI	DLBCL	rs6938973	C	T	6	98421721	0.00015919	73.4713	55.2629	1.80011e-19	0.2047
BMI	DLBCL	rs6950388	A	G	7	1270699	7.85065e-05	36.2303	55.2629	2.30001e-10	0.6186
BMI	DLBCL	rs698147	G	A	5	3513485	8.19489e-05	37.8191	55.2629	9.60064e-11	0.3792
BMI	DLBCL	rs7024334	G	T	9	109072075	6.57104e-05	30.3246	55.2629	6.69993e-09	0.9855
BMI	DLBCL	rs7027304	T	C	9	129408290	9.59731e-05	44.2918	55.2629	3.10027e-12	0.968
BMI	DLBCL	rs7034554	G	A	9	37081301	7.89073e-05	36.4153	55.2629	2.1e-10	0.0537106
BMI	DLBCL	rs7038943	C	T	9	120377178	8.8066e-05	40.6424	55.2629	1.80011e-11	0.2298
BMI	DLBCL	rs704061	C	T	12	89771903	0.000106261	49.0402	55.2629	1.69981e-13	0.0643502
BMI	DLBCL	rs705158	A	T	10	125232995	8.99128e-05	41.4947	55.2629	1.29987e-11	0.6765
BMI	DLBCL	rs7070670	T	C	10	61842645	6.69829e-05	30.9119	55.2629	5.99998e-09	0.7357
BMI	DLBCL	rs7081254	C	T	10	132955696	6.638e-05	30.6336	55.2629	6.19998e-09	0.1468
BMI	DLBCL	rs7124681	A	C	11	47529947	0.000319093	147.295	55.2629	1.50003e-37	0.0152398
BMI	DLBCL	rs71495038	A	G	10	33971383	0.000109768	50.6588	55.2629	6.70039e-14	0.2133
BMI	DLBCL	rs7201895	A	G	16	407723	0.000102646	47.3715	55.2629	6.00067e-13	0.3803
BMI	DLBCL	rs7206608	G	C	16	82872628	7.96706e-05	36.7676	55.2629	1.79999e-10	0.0356697
BMI	DLBCL	rs7218014	C	T	17	65832016	0.000113775	52.5084	55.2629	2.90001e-14	0.8611
BMI	DLBCL	rs7232171	T	G	18	31251221	7.40632e-05	34.1796	55.2629	8e-10	0.4328
BMI	DLBCL	rs723672	T	C	12	2161561	6.07468e-05	28.0338	55.2629	2.99999e-08	0.5059
BMI	DLBCL	rs7250833	T	C	19	33937277	7.4922e-05	34.5759	55.2629	6.69993e-10	0.2803
BMI	DLBCL	rs7259070	C	T	19	47562509	0.0002303	106.298	55.2629	6.59933e-27	0.4081
BMI	DLBCL	rs72634826	A	G	1	1601052	0.000174141	80.3729	55.2629	1e-20	0.609799
BMI	DLBCL	rs72649373	C	T	4	80609966	7.77973e-05	35.903	55.2629	6.1e-10	0.0717001
BMI	DLBCL	rs72892910	T	G	6	50816887	0.000428809	197.962	55.2629	1.50003e-49	0.6663
BMI	DLBCL	rs72976986	A	G	19	4050424	0.00016612	76.67	55.2629	7.59976e-20	0.2192
BMI	DLBCL	rs73052033	C	T	3	185828465	0.000278469	128.537	55.2629	7.70016e-33	0.825
BMI	DLBCL	rs7306534	A	G	12	68107914	5.98006e-05	27.5971	55.2629	4.09996e-08	0.2537
BMI	DLBCL	rs73124396	C	T	7	71579606	7.78174e-05	35.9123	55.2629	3.09999e-10	0.608501
BMI	DLBCL	rs73142879	T	C	20	51195932	0.000221344	102.164	55.2629	3.59998e-26	0.6252
BMI	DLBCL	rs73193736	G	A	12	108294381	0.000115776	53.4319	55.2629	2.19989e-14	0.8318
BMI	DLBCL	rs7331420	A	G	13	99236471	8.42091e-05	38.8623	55.2629	6.59933e-11	0.2118
BMI	DLBCL	rs7357754	G	A	9	92207308	9.9611e-05	45.9709	55.2629	1.10002e-12	0.8064
BMI	DLBCL	rs73601548	T	C	10	18549889	6.37963e-05	29.4412	55.2629	1.29999e-08	0.441
BMI	DLBCL	rs73985439	C	A	2	212299249	7.94584e-05	36.6697	55.2629	1.7e-10	0.9387
BMI	DLBCL	rs745249	T	C	2	105460333	0.000125591	57.9624	55.2629	1.10002e-15	0.2731
BMI	DLBCL	rs74750282	C	T	7	114744463	6.10262e-05	28.1628	55.2629	2.5e-08	0.3312
BMI	DLBCL	rs7498665	G	A	16	28883241	0.000346321	159.868	55.2629	2.29985e-40	0.9878
BMI	DLBCL	rs7516554	T	C	1	210301331	6.91926e-05	31.9317	55.2629	2.59998e-09	0.775001
BMI	DLBCL	rs7519259	A	G	1	66434743	9.77238e-05	45.0998	55.2629	1.69981e-12	0.752
BMI	DLBCL	rs7539903	A	T	1	209208033	8.20806e-05	37.8798	55.2629	8.30042e-11	0.131
BMI	DLBCL	rs75499503	T	C	6	26145217	0.000111643	51.5243	55.2629	8.9002e-14	0.741401
BMI	DLBCL	rs7571496	G	A	2	6169351	9.73105e-05	44.9091	55.2629	1.80011e-12	0.9334
BMI	DLBCL	rs76183894	C	T	3	114371939	7.15802e-05	33.0336	55.2629	1.7e-09	0.799
BMI	DLBCL	rs7683836	A	G	4	180167906	7.40113e-05	34.1556	55.2629	8.19993e-10	0.9491
BMI	DLBCL	rs7707394	A	G	5	74472939	0.000170233	78.5686	55.2629	8.60003e-21	0.8597
BMI	DLBCL	rs7708584	G	A	5	153543466	0.000124259	57.3474	55.2629	1.39991e-15	0.1438
BMI	DLBCL	rs7761673	A	T	6	70357368	6.33741e-05	29.2463	55.2629	1.29999e-08	0.751799
BMI	DLBCL	rs7762794	G	A	6	153380228	9.06516e-05	41.8357	55.2629	9.09913e-12	0.2734
BMI	DLBCL	rs7774	A	C	17	4801163	9.61807e-05	44.3876	55.2629	3.29989e-12	0.4782
BMI	DLBCL	rs7776021	A	G	6	73742152	6.2703e-05	28.9366	55.2629	1.40001e-08	0.5863
BMI	DLBCL	rs7802342	G	T	7	137435925	6.18641e-05	28.5494	55.2629	1.79999e-08	0.0743293
BMI	DLBCL	rs7805441	T	C	7	78121458	8.94395e-05	41.2763	55.2629	1.80011e-11	0.5129
BMI	DLBCL	rs78086698	C	T	12	24024639	7.75355e-05	35.7822	55.2629	3.59998e-10	0.5085
BMI	DLBCL	rs784257	C	T	18	53397199	9.79523e-05	45.2053	55.2629	1.99986e-12	0.5949
BMI	DLBCL	rs78605811	C	A	3	83631491	0.00010959	50.5768	55.2629	1.80011e-13	0.08688
BMI	DLBCL	rs7893571	T	G	10	16750129	8.79018e-05	40.5665	55.2629	2.29985e-11	0.0976293
BMI	DLBCL	rs7924036	T	G	10	65191645	0.000102006	47.0764	55.2629	5.10035e-13	0.3429
BMI	DLBCL	rs7925100	A	G	11	118941596	0.000103733	47.8734	55.2629	3.29989e-13	0.3942
BMI	DLBCL	rs7944782	G	T	11	130795698	0.000124151	57.2974	55.2629	2.19989e-15	0.3548
BMI	DLBCL	rs7947143	A	G	11	64090422	9.13785e-05	42.1712	55.2629	8.30042e-12	0.984
BMI	DLBCL	rs79780963	T	C	10	104952499	8.01129e-05	36.9717	55.2629	1.5e-10	0.8535
BMI	DLBCL	rs7996639	A	G	13	97019090	0.00010485	48.389	55.2629	3.59998e-13	0.745901
BMI	DLBCL	rs80135274	T	A	17	5286277	5.95406e-05	27.4771	55.2629	3.79997e-08	0.914
BMI	DLBCL	rs8015400	A	C	14	25930988	0.000199173	91.9285	55.2629	6.70039e-24	0.2449
BMI	DLBCL	rs8020365	A	T	14	79937216	0.000216664	100.003	55.2629	1e-25	0.0426305
BMI	DLBCL	rs8024137	T	A	15	35837297	6.29307e-05	29.0417	55.2629	1.6e-08	0.2049
BMI	DLBCL	rs8025516	G	T	15	95271872	9.82482e-05	45.3419	55.2629	1.69981e-12	0.2415
BMI	DLBCL	rs8076669	C	T	17	15888448	9.74556e-05	44.9761	55.2629	1.80011e-12	0.9802
BMI	DLBCL	rs8089514	A	T	18	69224478	7.8526e-05	36.2393	55.2629	3.89996e-10	0.1379
BMI	DLBCL	rs8132491	A	G	21	40288577	0.000101667	46.9197	55.2629	2.39994e-12	0.1393
BMI	DLBCL	rs815163	C	T	1	190294726	0.00013371	61.7099	55.2629	1e-16	0.5892
BMI	DLBCL	rs852042	G	A	20	17091233	6.30558e-05	29.0994	55.2629	1.40001e-08	0.00522504
BMI	DLBCL	rs862320	T	C	16	69651866	0.000259666	119.856	55.2629	1.20005e-30	0.8214
BMI	DLBCL	rs879620	T	C	16	4015729	0.000275821	127.315	55.2629	2.29985e-32	0.3608
BMI	DLBCL	rs909001	G	C	1	32196647	7.34994e-05	33.9194	55.2629	8e-10	0.3517
BMI	DLBCL	rs909892	A	G	20	41982698	7.90704e-05	36.4905	55.2629	2.59998e-10	0.3107
BMI	DLBCL	rs923994	G	A	4	67802992	7.21526e-05	33.2978	55.2629	1.29999e-09	0.3414
BMI	DLBCL	rs9267671	A	G	6	31880480	7.80107e-05	36.0015	55.2629	2.59998e-10	0.0921807
BMI	DLBCL	rs9294260	A	G	6	83433228	0.000109014	50.3107	55.2629	1e-13	0.382
BMI	DLBCL	rs9349235	T	C	6	42516718	6.05095e-05	27.9243	55.2629	2.59998e-08	0.9433
BMI	DLBCL	rs935166	A	G	2	26949366	0.000129687	59.853	55.2629	3.19963e-16	0.2714
BMI	DLBCL	rs9463175	T	C	6	9510030	5.92653e-05	27.3501	55.2629	4.39997e-08	0.136
BMI	DLBCL	rs9478496	C	T	6	154333183	9.0765e-05	41.888	55.2629	1.10002e-11	0.3447
BMI	DLBCL	rs9515446	G	A	13	112217108	0.000112834	52.0741	55.2629	3.19963e-14	0.2625
BMI	DLBCL	rs9522180	T	C	13	111970212	9.8404e-05	45.4138	55.2629	1.50003e-12	0.4481
BMI	DLBCL	rs9571687	A	C	13	67472713	8.09753e-05	37.3697	55.2629	1.40001e-10	0.7796
BMI	DLBCL	rs9638713	G	A	7	14645949	6.43621e-05	29.7023	55.2629	1.2e-08	0.3241
BMI	DLBCL	rs9673839	G	A	16	76895693	8.49109e-05	39.1862	55.2629	5.50047e-11	0.3441
BMI	DLBCL	rs9830592	A	C	3	104631603	0.000116633	53.8276	55.2629	1e-14	0.9868
BMI	DLBCL	rs9835772	T	A	3	85766025	0.000101916	47.0346	55.2629	4.70002e-13	0.0323497
BMI	DLBCL	rs9839081	A	G	3	123051230	6.0093e-05	27.7321	55.2629	4.60002e-08	0.3536
BMI	DLBCL	rs9843653	C	T	3	49920571	0.000433442	200.102	55.2629	2.90001e-50	0.5636
BMI	DLBCL	rs9888533	T	C	13	107854612	7.16277e-05	33.0556	55.2629	2.69998e-09	0.2835
BMI	DLBCL	rs9926784	C	T	16	19941968	0.000170765	78.8144	55.2629	8.60003e-21	0.8339
BMI	DLBCL	rs9951619	G	T	18	56882326	7.4271e-05	34.2755	55.2629	9.49992e-10	0.1659
HC	FL	rs1006399	A	G	6	101039470	6.55144e-05	30.2772	60.9006	9.49992e-09	0.3866
HC	FL	rs10100245	A	G	8	77226919	0.000207407	95.8655	60.9006	1.80011e-24	0.415
HC	FL	rs10118701	G	A	9	103061366	0.000123353	57.0103	60.9006	3.10027e-15	0.5292
HC	FL	rs10132514	T	C	14	104012189	6.858e-05	31.694	60.9006	5.60003e-09	0.3751
HC	FL	rs1013402	G	A	11	27712381	0.000374429	173.094	60.9006	5.10035e-43	0.7716
HC	FL	rs10145154	T	C	14	79939525	0.000222412	102.803	60.9006	4.60045e-26	0.0267701
HC	FL	rs10153248	G	A	17	407402	0.000124806	57.6819	60.9006	2.60016e-15	0.1994
HC	FL	rs10172196	A	G	2	36780549	0.000129102	59.6679	60.9006	7.39946e-16	0.4693
HC	FL	rs10188429	A	G	2	142297550	6.53225e-05	30.1885	60.9006	8.9e-09	0.5209
HC	FL	rs10210468	C	T	2	165377103	9.41521e-05	43.5132	60.9006	9.60064e-12	0.1073
HC	FL	rs1023767	A	G	8	95530969	8.48102e-05	39.1954	60.9006	6.20012e-11	0.00388803
HC	FL	rs1037702	A	G	4	180168024	6.34876e-05	29.3404	60.9006	1.7e-08	0.8629
HC	FL	rs10404726	T	C	19	18834514	0.000137883	63.7268	60.9006	9.60064e-17	0.4839
HC	FL	rs10407871	C	T	19	4040007	8.69304e-05	40.1754	60.9006	4.70002e-11	0.8463
HC	FL	rs10471636	A	G	5	63979856	6.99725e-05	32.3376	60.9006	5.69994e-09	0.587
HC	FL	rs1047891	A	C	2	211540507	0.000119107	55.0477	60.9006	7.8001e-15	0.9631
HC	FL	rs1056441	C	T	20	62370349	9.39471e-05	43.4185	60.9006	6.59933e-12	0.8744
HC	FL	rs1056720	T	C	20	3784110	6.13401e-05	28.3479	60.9006	2.80001e-08	0.2295
HC	FL	rs10744145	A	C	12	17209445	7.33707e-05	33.9082	60.9006	1.29999e-09	0.5002
HC	FL	rs10746833	G	A	9	90841862	0.000108659	50.2183	60.9006	2.19989e-13	0.587
HC	FL	rs10773051	T	C	12	124510391	0.000185091	85.5494	60.9006	5.90065e-22	0.677801
HC	FL	rs10788797	A	G	1	151003071	8.72519e-05	40.3239	60.9006	3.10027e-11	0.722199
HC	FL	rs10883553	A	C	10	102635475	0.000112737	52.1032	60.9006	5.19996e-14	0.6614
HC	FL	rs10938397	G	A	4	45182527	0.000292311	135.121	60.9006	7.70016e-34	0.5013
HC	FL	rs10947137	C	A	6	31094971	5.89911e-05	27.2623	60.9006	4.79999e-08	0.2231
HC	FL	rs10987417	T	G	9	129462501	7.7729e-05	35.9225	60.9006	6.1e-10	0.0913903
HC	FL	rs11012732	G	A	10	21830104	0.000178913	82.6932	60.9006	2.49977e-21	0.4998
HC	FL	rs11045163	G	A	12	20463526	6.43017e-05	29.7167	60.9006	1.29999e-08	0.2927
HC	FL	rs11056870	T	G	12	16465953	7.33851e-05	33.9148	60.9006	1.2e-09	0.0359104
HC	FL	rs11075252	G	A	16	9332571	6.42424e-05	29.6893	60.9006	1.40001e-08	0.639599
HC	FL	rs1108548	G	A	1	218634787	9.81839e-05	45.3767	60.9006	2.09991e-12	0.2859
HC	FL	rs11107114	A	G	12	93972927	6.26647e-05	28.9601	60.9006	2e-08	0.5339
HC	FL	rs11113445	G	A	12	108088682	7.74462e-05	35.7918	60.9006	4e-10	0.9208
HC	FL	rs11150745	G	A	17	78757626	0.000178228	82.3765	60.9006	3.40017e-21	0.9573
HC	FL	rs11164630	T	C	1	103352995	9.08843e-05	42.0028	60.9006	1.29987e-11	0.3267
HC	FL	rs11165643	T	C	1	96924097	0.000166027	76.7362	60.9006	4.70002e-20	0.751
HC	FL	rs11173522	A	C	12	60953472	6.31557e-05	29.187	60.9006	1.7e-08	0.539299
HC	FL	rs1123295	G	A	1	33910453	7.05693e-05	32.6134	60.9006	2.5e-09	0.2308
HC	FL	rs11263719	T	C	15	27220222	6.58689e-05	30.441	60.9006	1e-08	0.3297
HC	FL	rs112875651	A	G	8	126506694	0.000158899	73.4415	60.9006	1e-18	0.7094
HC	FL	rs113230003	A	G	19	18460956	8.50707e-05	39.3158	60.9006	8.99912e-11	0.0787608
HC	FL	rs113866544	C	T	17	46270606	0.00013938	64.4184	60.9006	6.20012e-17	0.0278599
HC	FL	rs11513729	T	C	12	112273499	0.000134408	62.1201	60.9006	4.70002e-16	0.3362
HC	FL	rs11704728	T	C	22	18130209	6.94312e-05	32.0874	60.9006	4.20001e-09	0.734401
HC	FL	rs117342986	T	C	16	54267868	6.52719e-05	30.1651	60.9006	4.70002e-08	0.9718
HC	FL	rs11751684	T	G	6	33528739	0.000111731	51.6381	60.9006	5.19996e-14	0.501
HC	FL	rs11762444	A	G	7	121979467	7.2218e-05	33.3754	60.9006	1.6e-09	0.5046
HC	FL	rs11779446	G	A	8	23388326	0.000110138	50.9021	60.9006	1.20005e-13	0.6385
HC	FL	rs1182199	A	C	7	2862542	0.0002574	118.979	60.9006	5.40008e-30	0.5374
HC	FL	rs11997077	G	A	8	2935385	6.00603e-05	27.7564	60.9006	4.70002e-08	0.6827
HC	FL	rs12072739	G	A	1	98315893	7.8235e-05	36.1564	60.9006	3.40001e-10	0.8858
HC	FL	rs12096864	C	T	1	209439141	7.52463e-05	34.7751	60.9006	1.09999e-09	0.428
HC	FL	rs12122361	G	A	1	174933414	7.40058e-05	34.2017	60.9006	1.09999e-09	0.4261
HC	FL	rs12128526	A	G	1	7723957	6.41515e-05	29.6473	60.9006	1.2e-08	0.0974496
HC	FL	rs12140153	T	G	1	62579891	0.000119532	55.2441	60.9006	3.29989e-14	0.9773
HC	FL	rs12245654	C	A	10	87562928	6.05902e-05	28.0013	60.9006	4.09996e-08	0.392
HC	FL	rs12364470	G	T	11	134601012	8.79047e-05	40.6256	60.9006	2.80027e-11	0.683701
HC	FL	rs12375196	A	C	7	103416541	0.00013722	63.4203	60.9006	1.39991e-16	0.4171
HC	FL	rs12427047	T	C	12	90213070	9.88714e-05	45.6945	60.9006	1.69981e-12	0.710901
HC	FL	rs12441543	A	G	15	31689543	9.49967e-05	43.9035	60.9006	5.30029e-12	0.698499
HC	FL	rs12462975	A	G	19	30272202	0.000158001	73.0264	60.9006	8.99912e-19	0.8642
HC	FL	rs12519997	A	G	5	173351858	9.66005e-05	44.6448	60.9006	2.90001e-12	0.7319
HC	FL	rs12568411	A	G	1	22622329	7.54835e-05	34.8847	60.9006	9.40005e-10	0.8092
HC	FL	rs12569355	G	A	1	11923737	9.95257e-05	45.9969	60.9006	1.59993e-12	0.4283
HC	FL	rs1260326	C	T	2	27730940	6.92932e-05	32.0236	60.9006	2.99999e-09	0.3717
HC	FL	rs12607512	G	A	18	31259579	6.86334e-05	31.7187	60.9006	4.39997e-09	0.5255
HC	FL	rs12762744	T	C	10	53669252	6.619e-05	30.5894	60.9006	8.40001e-09	0.5884
HC	FL	rs12831185	G	A	12	53860781	8.79755e-05	40.6584	60.9006	3.10027e-11	0.5667
HC	FL	rs1285992	G	A	14	91520438	0.000169803	78.4817	60.9006	2.90001e-20	0.0987802
HC	FL	rs12880641	G	T	14	103251452	9.96277e-05	46.0441	60.9006	1.39991e-12	0.0403896
HC	FL	rs12881629	G	A	14	101146413	8.41821e-05	38.9051	60.9006	7.39946e-11	0.1573
HC	FL	rs12883788	T	C	14	33303540	0.000102815	47.5174	60.9006	7.89951e-13	0.9933
HC	FL	rs12921916	C	T	16	20407196	6.50036e-05	30.0411	60.9006	1.6e-08	0.7858
HC	FL	rs12939848	T	C	17	65370808	7.67539e-05	35.4719	60.9006	5.60003e-10	0.8437
HC	FL	rs1294438	T	C	6	6752059	0.000158807	73.3987	60.9006	9.70063e-19	0.0707196
HC	FL	rs1296328	C	A	4	137083193	0.000123314	56.9922	60.9006	4.19952e-15	0.9275
HC	FL	rs13017207	A	G	2	100841235	0.000124584	57.5791	60.9006	1.99986e-15	0.135
HC	FL	rs13081528	T	G	3	78505164	6.09174e-05	28.1526	60.9006	3.2e-08	0.2736
HC	FL	rs13107325	T	C	4	103188709	0.000207159	95.751	60.9006	1.69981e-24	0.9485
HC	FL	rs13148263	A	G	4	1699512	0.000113285	52.3567	60.9006	3.59998e-14	0.4344
HC	FL	rs13156484	A	G	5	122653399	0.000152508	70.4868	60.9006	3.90032e-18	0.2357
HC	FL	rs13204087	A	G	6	163005021	6.93497e-05	32.0498	60.9006	3.59998e-09	0.4511
HC	FL	rs13284988	C	T	9	14766563	6.18743e-05	28.5948	60.9006	2.99999e-08	0.2662
HC	FL	rs13292699	C	A	9	15910044	0.000130081	60.1202	60.9006	6.70039e-16	0.785301
HC	FL	rs13333747	C	T	16	2175373	0.000144161	66.6288	60.9006	2.29985e-17	0.7858
HC	FL	rs13389219	T	C	2	165528876	0.000247002	114.171	60.9006	4.70002e-29	0.7
HC	FL	rs139218003	T	G	5	50954977	0.000118195	54.6262	60.9006	1.20005e-14	0.653
HC	FL	rs141622900	A	G	19	45426792	0.00010104	46.697	60.9006	3.59998e-12	0.9613
HC	FL	rs143384	G	A	20	34025756	0.000344704	159.348	60.9006	1.29987e-39	0.6296
HC	FL	rs143786003	A	C	12	124695007	6.64924e-05	30.7292	60.9006	1.79999e-08	0.4779
HC	FL	rs1446585	G	A	2	136407479	6.10066e-05	28.1938	60.9006	1.5e-08	0.8632
HC	FL	rs1452082	A	C	3	62465039	7.81718e-05	36.1272	60.9006	6.80002e-10	0.0974608
HC	FL	rs1458156	T	C	12	41887940	7.9953e-05	36.9505	60.9006	2.30001e-10	0.0429596
HC	FL	rs1477290	C	T	5	87988934	0.00021081	97.4388	60.9006	1.59993e-24	0.6712
HC	FL	rs147730268	T	G	12	123024476	0.000407877	188.563	60.9006	1.29987e-44	0.9587
HC	FL	rs1480474	G	A	12	66326943	0.000102395	47.3229	60.9006	7.39946e-13	0.3065
HC	FL	rs1481630	C	T	2	183097705	6.89861e-05	31.8817	60.9006	4e-09	0.7461
HC	FL	rs1502317	T	C	11	8682018	9.19459e-05	42.4935	60.9006	1.10002e-11	0.8973
HC	FL	rs1514895	G	A	3	170705693	0.000124456	57.5202	60.9006	2.09991e-15	0.8834
HC	FL	rs1538535	T	C	9	35681299	6.16338e-05	28.4836	60.9006	2.69998e-08	0.2843
HC	FL	rs1576655	C	A	13	79587841	0.000125334	57.9258	60.9006	7.70016e-15	0.68
HC	FL	rs1609783	A	G	3	25095911	0.000101579	46.946	60.9006	1.10002e-12	0.9327
HC	FL	rs170016	A	G	7	32446317	6.29888e-05	29.1099	60.9006	2.59998e-08	0.1862
HC	FL	rs1727901	T	C	3	153832678	0.000162131	74.9351	60.9006	1.50003e-19	0.8542
HC	FL	rs17361789	G	T	1	172122601	6.97665e-05	32.2424	60.9006	4e-09	0.2399
HC	FL	rs17604662	G	A	16	72221464	6.3789e-05	29.4797	60.9006	1.5e-08	0.4814
HC	FL	rs17639546	A	G	3	61251635	8.90962e-05	41.1764	60.9006	1.99986e-11	0.9887
HC	FL	rs17733217	G	A	20	51222704	8.82504e-05	40.7854	60.9006	3.10027e-11	0.4097
HC	FL	rs17766836	T	C	7	92258961	0.000211712	97.8559	60.9006	6.09958e-25	0.01536
HC	FL	rs17770336	T	C	9	28414625	0.000160173	74.0302	60.9006	2.39994e-19	0.452
HC	FL	rs1801123	C	T	2	227661043	7.27839e-05	33.637	60.9006	1.2e-09	0.5202
HC	FL	rs1813212	G	A	11	89301382	8.36042e-05	38.638	60.9006	9.20026e-11	0.8222
HC	FL	rs186017271	A	G	15	83368605	7.36609e-05	34.0423	60.9006	4.70002e-09	0.5052
HC	FL	rs1868069	A	G	2	205388946	8.05213e-05	37.2131	60.9006	1.89998e-10	0.7067
HC	FL	rs190543502	C	T	15	43757184	7.47115e-05	34.5279	60.9006	1.2e-09	0.3231
HC	FL	rs1955695	G	A	14	61021891	0.000137855	63.7134	60.9006	8.9002e-17	0.5425
HC	FL	rs1982441	T	G	8	28021769	6.56992e-05	30.3626	60.9006	9.69996e-09	0.9816
HC	FL	rs2022050	A	G	11	64367651	0.0001177	54.3973	60.9006	1.69981e-14	0.3887
HC	FL	rs2023211	C	T	14	62374092	9.17368e-05	42.3968	60.9006	1.10002e-11	0.1132
HC	FL	rs211434	A	G	6	133611571	7.48224e-05	34.5792	60.9006	8.60003e-10	0.4613
HC	FL	rs2133292	T	C	12	103048184	8.19182e-05	37.8587	60.9006	1.5e-10	0.9413
HC	FL	rs2159437	G	A	17	68439660	0.000192315	88.8886	60.9006	8.9002e-23	0.3847
HC	FL	rs2172131	C	T	10	133978962	9.13799e-05	42.2319	60.9006	1.20005e-11	0.6353
HC	FL	rs2178385	T	G	3	131753297	0.000149795	69.2328	60.9006	3.40017e-18	0.649901
HC	FL	rs2238689	C	T	19	46178661	9.62722e-05	44.4931	60.9006	3.59998e-12	0.6012
HC	FL	rs2288745	T	C	2	241728843	7.83202e-05	36.1958	60.9006	3.50002e-10	0.6857
HC	FL	rs2307111	C	T	5	75003678	0.000389167	179.91	60.9006	1.59993e-44	0.4406
HC	FL	rs2371767	C	G	3	64718258	0.000151194	69.8798	60.9006	2.09991e-18	0.2885
HC	FL	rs2384054	C	T	2	25156773	0.000239823	110.852	60.9006	2.90001e-28	0.0197802
HC	FL	rs2479958	G	A	13	111984244	8.42909e-05	38.9554	60.9006	1.2e-10	0.9865
HC	FL	rs2494196	A	C	1	219762581	0.000399554	184.714	60.9006	6.89922e-46	0.8992
HC	FL	rs2499468	A	C	6	51809081	7.89513e-05	36.4875	60.9006	2.80001e-10	0.02208
HC	FL	rs253444	A	G	5	141793741	8.84507e-05	40.878	60.9006	2.49977e-11	0.786001
HC	FL	rs2568958	A	G	1	72765116	0.000204447	94.4971	60.9006	2.19989e-24	0.283
HC	FL	rs2577955	T	C	15	42012178	6.81211e-05	31.4819	60.9006	4.79999e-09	0.8926
HC	FL	rs2585526	G	A	13	78624080	7.4244e-05	34.3118	60.9006	1.09999e-09	0.4174
HC	FL	rs2606227	C	T	3	183536836	7.19697e-05	33.2607	60.9006	2.39999e-09	0.9465
HC	FL	rs2660241	C	T	16	4940023	8.97312e-05	41.4699	60.9006	1.9002e-11	0.9843
HC	FL	rs2678204	G	T	1	201800511	0.000173772	80.3166	60.9006	7.10068e-21	0.8002
HC	FL	rs273505	C	T	19	18217147	8.0848e-05	37.3641	60.9006	1.89998e-10	0.5512
HC	FL	rs2737263	T	G	8	116667539	0.000225944	104.436	60.9006	1.59993e-26	0.7866
HC	FL	rs2744956	C	T	6	34618937	0.000692778	320.365	60.9006	2.80027e-78	0.4804
HC	FL	rs2814350	A	G	10	88008785	8.15771e-05	37.7011	60.9006	3.40001e-10	0.9495
HC	FL	rs2821226	G	A	1	203517292	0.000114226	52.7917	60.9006	4.30031e-14	0.1914
HC	FL	rs28366156	C	T	6	31671498	0.00016037	74.1215	60.9006	2.19989e-19	0.219
HC	FL	rs2861685	C	T	2	67837553	0.000105799	48.8967	60.9006	2.29985e-13	0.8868
HC	FL	rs28711392	C	T	11	13349559	7.28789e-05	33.6809	60.9006	1.89998e-09	0.9249
HC	FL	rs28778940	A	G	9	98298352	0.000101644	46.976	60.9006	9.70063e-13	0.5268
HC	FL	rs287837	G	A	6	83430793	8.53226e-05	39.4322	60.9006	6.4998e-11	0.3814
HC	FL	rs2897968	A	G	12	46763686	7.18959e-05	33.2266	60.9006	1.89998e-09	0.2914
HC	FL	rs3012053	G	A	10	77293109	9.13644e-05	42.2247	60.9006	1.20005e-11	0.776699
HC	FL	rs308911	G	A	2	86855977	8.31626e-05	38.4339	60.9006	9.70063e-11	0.762801
HC	FL	rs310796	T	G	12	77453226	6.37065e-05	29.4416	60.9006	1.6e-08	0.658999
HC	FL	rs3110942	A	G	7	33003171	8.06926e-05	37.2923	60.9006	2e-10	0.9528
HC	FL	rs3116600	G	A	13	51107900	0.000119036	55.0149	60.9006	1e-14	0.9491
HC	FL	rs314288	C	T	6	105434078	0.000103992	48.061	60.9006	4.60045e-13	0.3514
HC	FL	rs329118	T	C	5	133861663	0.000130153	60.1536	60.9006	5.79963e-16	0.5628
HC	FL	rs33503	A	G	3	42427957	9.58251e-05	44.2865	60.9006	3.40017e-12	0.8355
HC	FL	rs340025	C	T	15	60908307	7.90868e-05	36.5501	60.9006	3.29997e-10	0.0829507
HC	FL	rs34045894	A	G	10	33967489	7.39489e-05	34.1754	60.9006	1.09999e-09	0.529
HC	FL	rs34223321	A	C	17	38352388	8.34248e-05	38.5551	60.9006	8.80035e-11	0.2326
HC	FL	rs34505073	A	G	13	50237255	0.000141895	65.5811	60.9006	5.50047e-17	0.677801
HC	FL	rs34517439	A	C	1	78450517	0.000441992	204.342	60.9006	1.99986e-49	0.0693905
HC	FL	rs34594435	T	C	7	72977249	0.000146517	67.7177	60.9006	8.60003e-18	0.3744
HC	FL	rs34629844	G	A	5	200829	0.000101421	46.8731	60.9006	8.30042e-13	0.1486
HC	FL	rs34656389	G	A	4	96153214	5.93281e-05	27.4181	60.9006	4.60002e-08	0.9226
HC	FL	rs34765854	G	T	6	40368860	0.000156439	72.304	60.9006	5.50047e-19	0.1415
HC	FL	rs34769775	T	C	15	80989172	8.32257e-05	38.463	60.9006	1e-10	0.0178599
HC	FL	rs34772064	G	T	4	55495948	6.96095e-05	32.1698	60.9006	3.09999e-09	0.1886
HC	FL	rs34811474	A	G	4	25408838	0.000139072	64.276	60.9006	5.40008e-17	0.6489
HC	FL	rs34840745	T	C	19	7183797	0.000107247	49.5658	60.9006	2.39994e-13	0.3257
HC	FL	rs34848742	G	T	4	123828042	6.88441e-05	31.8161	60.9006	3.69999e-09	0.8063
HC	FL	rs35506085	A	G	11	2165576	0.000126519	58.4738	60.9006	2.39994e-15	0.4427
HC	FL	rs35537311	T	C	17	71126150	0.000103581	47.8714	60.9006	6.00067e-13	0.9758
HC	FL	rs35589824	C	T	3	181090035	6.31007e-05	29.1616	60.9006	2.59998e-08	0.00878699
HC	FL	rs35882248	T	C	2	230627955	0.000106339	49.1462	60.9006	2.29985e-13	0.672
HC	FL	rs35917007	G	A	19	1849147	0.000108388	50.093	60.9006	1.50003e-13	0.9285
HC	FL	rs35957544	T	G	8	73440371	0.000181385	83.8361	60.9006	1.50003e-21	0.1105
HC	FL	rs36140	C	A	5	66164160	0.000102095	47.1845	60.9006	9.49948e-13	0.4979
HC	FL	rs365352	A	G	5	77401152	0.000155793	72.0056	60.9006	6.59933e-19	0.224
HC	FL	rs3730071	A	C	12	49168798	8.01988e-05	37.0641	60.9006	2.1e-10	0.5086
HC	FL	rs3737992	A	G	1	33234128	0.000129973	60.0701	60.9006	4.90004e-16	0.616799
HC	FL	rs3746759	G	T	20	61560004	6.85658e-05	31.6874	60.9006	4.39997e-09	0.6003
HC	FL	rs3762988	T	C	5	32709653	7.60067e-05	35.1265	60.9006	6.49995e-10	0.1055
HC	FL	rs3807566	T	G	7	50564204	0.000110036	50.855	60.9006	1.10002e-13	0.0528202
HC	FL	rs3810291	A	G	19	47569003	0.00022678	104.822	60.9006	1.29987e-26	0.3928
HC	FL	rs3811951	G	A	5	95762477	9.13468e-05	42.2166	60.9006	1.10002e-11	0.705
HC	FL	rs3814883	T	C	16	29994922	0.000313826	145.069	60.9006	5.00035e-36	0.8442
HC	FL	rs3826408	T	C	17	7101292	9.1638e-05	42.3512	60.9006	1.10002e-11	0.8487
HC	FL	rs3845344	T	C	1	75001480	9.16349e-05	42.3497	60.9006	9.70063e-12	0.1918
HC	FL	rs3935190	A	G	17	79084367	9.9051e-05	45.7775	60.9006	2.29985e-12	0.9229
HC	FL	rs394608	C	T	21	46581798	0.000106134	49.0513	60.9006	3.59998e-13	0.4961
HC	FL	rs40071	C	T	5	107496102	8.92842e-05	41.2633	60.9006	2.19989e-11	0.0354201
HC	FL	rs4017425	T	C	3	44028764	6.98165e-05	32.2655	60.9006	3.09999e-09	0.2314
HC	FL	rs41271299	T	C	6	19839415	0.000144424	66.7502	60.9006	1.29987e-17	0.3005
HC	FL	rs41273794	T	C	6	41755708	0.000150024	69.3388	60.9006	3.50026e-18	0.7973
HC	FL	rs41279738	G	T	1	110082551	0.000182124	84.1774	60.9006	1.20005e-21	0.6084
HC	FL	rs4240326	G	A	4	145839264	0.00038617	178.524	60.9006	2.70023e-44	0.8634
HC	FL	rs4253755	A	G	22	46615376	0.000100033	46.2314	60.9006	1.99986e-12	0.195
HC	FL	rs429343	G	A	2	147903382	7.26315e-05	33.5665	60.9006	1.40001e-09	0.8336
HC	FL	rs4310395	G	A	1	232795105	7.36684e-05	34.0458	60.9006	1e-09	0.8589
HC	FL	rs4339309	G	A	5	22208931	6.4435e-05	29.7783	60.9006	1.40001e-08	0.2397
HC	FL	rs4350264	A	G	10	70242946	7.39982e-05	34.1982	60.9006	1e-09	0.732399
HC	FL	rs4467770	A	G	6	12086826	9.91335e-05	45.8156	60.9006	1.80011e-12	0.3641
HC	FL	rs4476935	T	C	7	112987650	8.13788e-05	37.6094	60.9006	1.5e-10	0.715599
HC	FL	rs4477562	T	C	13	54104968	0.00019144	88.4844	60.9006	2.29985e-22	0.379
HC	FL	rs4486868	C	T	15	99472734	6.09934e-05	28.1877	60.9006	3.40001e-08	0.790901
HC	FL	rs4567604	T	G	13	59204270	8.67719e-05	40.1021	60.9006	5.00035e-11	0.2266
HC	FL	rs4589131	G	T	1	161167698	6.65914e-05	30.7749	60.9006	6.4e-09	0.8121
HC	FL	rs4613074	C	T	16	19942527	8.74372e-05	40.4096	60.9006	3.29989e-11	0.628599
HC	FL	rs463376	A	G	19	34318210	7.18914e-05	33.2245	60.9006	1.89998e-09	0.5182
HC	FL	rs4678016	T	C	3	123101981	6.15448e-05	28.4425	60.9006	2.5e-08	0.3809
HC	FL	rs475390	A	G	1	41570459	6.86924e-05	31.746	60.9006	3.89996e-09	0.001754
HC	FL	rs4790292	A	C	17	1824305	0.000178423	82.4666	60.9006	4.10015e-21	0.0242198
HC	FL	rs4792716	G	A	17	15943144	0.000104365	48.2337	60.9006	4.60045e-13	0.4807
HC	FL	rs4800490	C	A	18	21126081	0.000268446	124.086	60.9006	3.59998e-31	0.0298003
HC	FL	rs483465	G	A	3	136047977	9.01774e-05	41.6761	60.9006	1.50003e-11	0.4809
HC	FL	rs4870057	G	A	6	152171898	7.24282e-05	33.4726	60.9006	2.39999e-09	0.2423
HC	FL	rs4909309	C	T	8	135619272	0.000143801	66.462	60.9006	1.69981e-17	0.9932
HC	FL	rs4963975	A	G	12	26443030	0.000130393	60.2643	60.9006	6.09958e-16	0.8662
HC	FL	rs4976994	G	A	8	143373494	8.16738e-05	37.7458	60.9006	1.5e-10	0.4574
HC	FL	rs4985407	G	A	16	70285901	0.000117082	54.1118	60.9006	1.80011e-14	0.0353802
HC	FL	rs522110	G	A	10	99772885	0.000162162	74.9495	60.9006	1.69981e-19	0.719
HC	FL	rs543874	G	A	1	177889480	0.000671302	310.427	60.9006	8.00018e-76	0.1543
HC	FL	rs551935	G	T	11	30500832	0.000141218	65.2684	60.9006	3.10027e-17	0.7894
HC	FL	rs55707359	G	T	11	46159333	6.38194e-05	29.4938	60.9006	2.19999e-08	0.7946
HC	FL	rs55726687	A	G	12	991306	0.00015778	72.9242	60.9006	4.49987e-19	0.3297
HC	FL	rs56094641	G	A	16	53806453	0.00183013	847.283	60.9006	1e-200	0.8059
HC	FL	rs56399737	T	C	13	33381721	6.91349e-05	31.9505	60.9006	4.30002e-09	0.1292
HC	FL	rs57235969	T	C	2	204105403	7.67346e-05	35.4629	60.9006	4.60002e-10	0.5875
HC	FL	rs57636386	C	T	18	58048295	0.000189055	87.3818	60.9006	2.60016e-22	0.8329
HC	FL	rs57989773	C	T	6	100629078	0.000177015	81.8156	60.9006	4.00037e-20	0.9859
HC	FL	rs58584712	A	G	2	112249583	9.60426e-05	44.387	60.9006	3.19963e-12	0.3123
HC	FL	rs58862095	T	C	7	75081418	0.000159625	73.7771	60.9006	3.69999e-19	0.0975911
HC	FL	rs59227842	G	A	11	43692423	0.000189566	87.6178	60.9006	3.40017e-22	0.0955103
HC	FL	rs60226453	T	C	1	203489683	7.72381e-05	35.6956	60.9006	3.89996e-10	0.848
HC	FL	rs6066104	T	C	20	45530530	0.000162915	75.2975	60.9006	1.69981e-19	0.4125
HC	FL	rs6142059	C	T	20	32544327	0.000112424	51.9587	60.9006	6.4998e-14	0.1972
HC	FL	rs614520	A	G	11	65664006	7.81431e-05	36.1139	60.9006	8e-10	0.9423
HC	FL	rs61941722	A	G	12	97555085	7.45167e-05	34.4378	60.9006	1.2e-09	0.5133
HC	FL	rs61969510	C	T	13	86484025	6.63685e-05	30.6719	60.9006	1e-08	0.1357
HC	FL	rs61992671	G	A	14	101531854	0.000115115	53.2026	60.9006	3.40017e-13	0.6194
HC	FL	rs62070648	A	G	17	29210595	0.00015633	72.2535	60.9006	7.8001e-19	0.2947
HC	FL	rs62107261	C	T	2	422144	0.000601149	277.967	60.9006	1.10002e-67	0.9931
HC	FL	rs62246311	A	G	3	9498143	9.03632e-05	41.762	60.9006	1.39991e-11	0.1124
HC	FL	rs62301134	C	T	4	68441583	7.21536e-05	33.3457	60.9006	1.79999e-09	0.5784
HC	FL	rs62396185	C	G	6	26180634	0.000460838	213.058	60.9006	1.80011e-52	0.00906296
HC	FL	rs62425398	A	C	6	166416028	0.000117465	54.2887	60.9006	1.9002e-14	0.6067
HC	FL	rs62515438	G	T	8	57161608	7.95424e-05	36.7607	60.9006	2.5e-10	0.2152
HC	FL	rs643499	C	T	11	121938945	6.8517e-05	31.6649	60.9006	4.90004e-09	0.8953
HC	FL	rs6438656	A	G	3	121485239	6.62375e-05	30.6114	60.9006	7.19996e-09	0.0821694
HC	FL	rs6465828	T	G	7	77421817	0.000134171	62.0107	60.9006	1.9002e-16	0.7587
HC	FL	rs6470771	C	A	8	130743726	6.72363e-05	31.073	60.9006	5.80003e-09	0.7449
HC	FL	rs6545714	A	G	2	59307725	0.000120086	55.5003	60.9006	7.10068e-15	0.8513
HC	FL	rs6567160	C	T	18	57829135	0.00097883	452.775	60.9006	5.70164e-109	0.0140699
HC	FL	rs6575340	A	G	14	94023972	0.000157681	72.8781	60.9006	6.70039e-19	0.604399
HC	FL	rs6598540	G	A	15	99230191	8.75653e-05	40.4688	60.9006	3.40017e-11	0.8907
HC	FL	rs66679256	T	C	4	18351898	0.000111032	51.3151	60.9006	7.50067e-14	0.4039
HC	FL	rs6669341	G	A	1	47678458	0.000111313	51.4451	60.9006	6.09958e-14	0.3836
HC	FL	rs6712653	T	C	2	242534233	6.83065e-05	31.5676	60.9006	4.30002e-09	0.8927
HC	FL	rs6744646	G	A	2	628504	0.000712548	329.514	60.9006	1.99986e-80	0.425
HC	FL	rs6745626	T	C	2	181436641	9.38992e-05	43.3963	60.9006	6.00067e-12	0.3011
HC	FL	rs6747657	A	G	2	112003163	6.77044e-05	31.2893	60.9006	4.70002e-09	0.2532
HC	FL	rs675162	G	A	6	160776325	0.000161933	74.844	60.9006	1.80011e-19	0.5737
HC	FL	rs67560975	C	T	17	47142930	9.11892e-05	42.1437	60.9006	1.50003e-11	0.9844
HC	FL	rs6840236	C	T	4	56289785	0.000143489	66.3177	60.9006	1.9002e-17	0.3537
HC	FL	rs6868125	T	C	5	164472399	7.12558e-05	32.9307	60.9006	1.89998e-09	0.2443
HC	FL	rs6946415	G	A	7	150684548	0.000117978	54.5261	60.9006	1.39991e-14	0.988
HC	FL	rs6958365	T	C	7	33955171	6.44863e-05	29.802	60.9006	1.5e-08	0.0175198
HC	FL	rs6973700	G	A	7	1856669	8.15282e-05	37.6785	60.9006	1.5e-10	0.00757705
HC	FL	rs698147	G	A	5	3513485	7.31883e-05	33.8239	60.9006	1.29999e-09	0.0428697
HC	FL	rs7002088	C	A	8	10494738	9.2952e-05	42.9585	60.9006	7.89951e-12	0.8699
HC	FL	rs7034554	G	A	9	37081301	7.22391e-05	33.3852	60.9006	1.6e-09	0.0584602
HC	FL	rs7038943	C	T	9	120377178	6.56895e-05	30.3581	60.9006	8.60003e-09	0.595
HC	FL	rs705165	T	G	10	125256095	8.17224e-05	37.7682	60.9006	1.40001e-10	0.681299
HC	FL	rs7094073	T	C	10	75704501	8.26825e-05	38.212	60.9006	2.30001e-09	0.3969
HC	FL	rs7111235	C	T	11	133658661	6.65915e-05	30.775	60.9006	8.40001e-09	0.7415
HC	FL	rs7124681	A	C	11	47529947	0.000203134	93.8904	60.9006	3.69999e-24	0.5
HC	FL	rs7132908	A	G	12	50263148	0.000314419	145.343	60.9006	2.80027e-36	0.8642
HC	FL	rs71413981	A	G	14	23774916	0.000122474	56.6038	60.9006	5.30029e-15	0.2945
HC	FL	rs7171864	A	G	15	73227249	0.000117728	54.4104	60.9006	1.9002e-14	0.1153
HC	FL	rs7218014	C	T	17	65832016	0.000136605	63.1359	60.9006	1.29987e-16	0.4566
HC	FL	rs7248205	T	C	19	10770305	0.000124701	57.6335	60.9006	2.99985e-15	0.7173
HC	FL	rs7257083	A	G	19	33943986	0.00010858	50.1819	60.9006	1.69981e-13	0.6892
HC	FL	rs72634826	A	G	1	1601052	9.04242e-05	41.7901	60.9006	2.60016e-11	0.558
HC	FL	rs72656010	C	T	8	57122215	0.000146244	67.5915	60.9006	1.20005e-17	0.0535205
HC	FL	rs72681698	C	T	14	51207741	7.28853e-05	33.6838	60.9006	1.40001e-09	0.4061
HC	FL	rs7274811	T	G	20	32333181	0.000145953	67.457	60.9006	1.10002e-17	0.0931408
HC	FL	rs72756476	C	T	9	95453880	8.99704e-05	41.5804	60.9006	2.09991e-11	0.3016
HC	FL	rs72877553	C	T	6	76215658	6.03148e-05	27.874	60.9006	3.59998e-08	0.9358
HC	FL	rs72959041	A	G	6	127454893	0.000410179	189.627	60.9006	9.49948e-46	0.4977
HC	FL	rs73052033	C	T	3	185828465	0.000130547	60.3356	60.9006	5.30029e-16	0.4356
HC	FL	rs73175572	G	A	3	185490184	0.000157928	72.9926	60.9006	1e-18	0.9851
HC	FL	rs73197346	C	T	21	36770189	7.41356e-05	34.2617	60.9006	1.29999e-09	0.2517
HC	FL	rs7365	G	A	11	93211764	6.14632e-05	28.4048	60.9006	2.59998e-08	0.3022
HC	FL	rs73650963	C	T	9	93943033	7.83798e-05	36.2233	60.9006	4.09996e-10	0.8892
HC	FL	rs7372674	A	C	3	196149165	9.46472e-05	43.7421	60.9006	4.60045e-12	0.326
HC	FL	rs743572	G	A	10	104597152	0.000107309	49.5945	60.9006	1.99986e-13	0.1597
HC	FL	rs7460093	A	G	8	144876159	9.29881e-05	42.9752	60.9006	1.20005e-11	0.5077
HC	FL	rs74749286	A	G	11	14322359	0.000128827	59.5408	60.9006	1.20005e-15	0.8768
HC	FL	rs7498665	G	A	16	28883241	0.000484824	224.153	60.9006	6.4003e-55	0.4203
HC	FL	rs750090	C	T	4	152931436	8.11303e-05	37.4946	60.9006	2.5e-10	0.0162798
HC	FL	rs7519259	A	G	1	66434743	9.97053e-05	46.0799	60.9006	1.50003e-12	0.3902
HC	FL	rs7523668	A	G	1	42408159	9.24865e-05	42.7434	60.9006	8.60003e-12	0.9426
HC	FL	rs75543804	T	G	2	111900904	9.77147e-05	45.1598	60.9006	2.49977e-12	0.593
HC	FL	rs756717	A	G	16	72996162	9.44133e-05	43.6339	60.9006	9.70063e-12	0.7014
HC	FL	rs7570446	A	C	2	193801010	6.01942e-05	27.8183	60.9006	3.29997e-08	0.1935
HC	FL	rs7571496	G	A	2	6169351	7.35499e-05	33.991	60.9006	1.2e-09	0.5005
HC	FL	rs7582359	A	G	2	55286681	8.13921e-05	37.6156	60.9006	1.7e-10	0.4095
HC	FL	rs76082446	A	G	3	71624342	7.34229e-05	33.9323	60.9006	1.29999e-09	0.713801
HC	FL	rs7632381	C	T	3	141106063	0.000361125	166.942	60.9006	1.20005e-41	0.724001
HC	FL	rs76577501	A	G	7	26756958	6.93464e-05	32.0482	60.9006	3.50002e-09	0.4099
HC	FL	rs76647086	T	G	1	23429461	0.000119073	55.0321	60.9006	8.00018e-15	0.1952
HC	FL	rs76798800	T	G	1	154994978	0.000232937	107.669	60.9006	2.19989e-27	0.1981
HC	FL	rs76895963	G	T	12	4384844	0.000296913	137.249	60.9006	1.39991e-28	0.5799
HC	FL	rs7696175	C	T	4	38820986	9.23129e-05	42.6631	60.9006	1.10002e-11	0.5762
HC	FL	rs7707394	A	G	5	74472939	0.000156676	72.4137	60.9006	5.50047e-19	0.7978
HC	FL	rs7708584	G	A	5	153543466	8.52428e-05	39.3953	60.9006	5.30029e-11	0.3561
HC	FL	rs7805441	T	C	7	78121458	8.04454e-05	37.178	60.9006	2.5e-10	0.9105
HC	FL	rs78058190	A	G	2	219699999	0.000116182	53.6957	60.9006	1.10002e-11	0.8172
HC	FL	rs7824785	T	C	8	128114710	8.93498e-05	41.2936	60.9006	2.09991e-11	0.600999
HC	FL	rs7864465	A	G	9	133808080	6.05109e-05	27.9647	60.9006	3.29997e-08	0.9611
HC	FL	rs7893571	T	G	10	16750129	8.52093e-05	39.3799	60.9006	6.4998e-11	0.7196
HC	FL	rs7903146	T	C	10	114758349	0.000189077	87.3918	60.9006	1.69981e-22	0.5507
HC	FL	rs7944782	G	T	11	130795698	8.39174e-05	38.7827	60.9006	9.8992e-11	0.9947
HC	FL	rs7952436	T	C	11	67024534	0.000189266	87.4794	60.9006	1.59993e-22	0.4849
HC	FL	rs7996639	A	G	13	97019090	9.307e-05	43.013	60.9006	1.10002e-11	0.4648
HC	FL	rs8007429	A	G	14	35366743	7.97481e-05	36.8557	60.9006	3.40001e-10	0.4237
HC	FL	rs8030456	T	C	15	68076856	0.000214896	99.3279	60.9006	2.09991e-25	0.7854
HC	FL	rs8132129	T	C	21	17400916	7.64143e-05	35.3149	60.9006	8.40001e-10	0.2714
HC	FL	rs8133137	G	A	21	40290503	0.000111061	51.3288	60.9006	8.80035e-14	0.3142
HC	FL	rs815163	C	T	1	190294726	0.000140489	64.931	60.9006	3.19963e-17	0.6598
HC	FL	rs852042	G	A	20	17091233	8.6521e-05	39.9861	60.9006	4.30031e-11	0.708101
HC	FL	rs852983	A	G	5	142712064	6.99373e-05	32.3213	60.9006	2.80001e-09	0.893
HC	FL	rs866006	G	T	5	112176559	6.86308e-05	31.7175	60.9006	4e-09	0.5078
HC	FL	rs897186	G	A	3	93985100	0.000127777	59.0553	60.9006	9.20026e-16	0.3047
HC	FL	rs9284814	A	G	3	88273071	0.000108019	49.9226	60.9006	1.50003e-13	0.1543
HC	FL	rs9378684	T	C	6	2110941	0.000104684	48.381	60.9006	5.79963e-13	0.4021
HC	FL	rs9385385	T	C	6	126122280	8.12317e-05	37.5415	60.9006	2e-10	0.8681
HC	FL	rs9512696	G	A	13	28012527	0.000132656	61.3103	60.9006	3.59998e-16	0.2529
HC	FL	rs9513018	T	G	13	28640563	5.97123e-05	27.5956	60.9006	4.49997e-08	0.6944
HC	FL	rs9611160	A	G	22	39747418	6.61238e-05	30.5588	60.9006	8.70001e-09	0.121
HC	FL	rs968379	T	C	2	172401050	0.000124622	57.5968	60.9006	2.39994e-15	0.368
HC	FL	rs9764678	C	T	5	118726662	0.000103127	47.6615	60.9006	7.59976e-13	0.2654
HC	FL	rs9830592	A	C	3	104631603	9.31217e-05	43.0369	60.9006	7.10068e-12	0.8728
HC	FL	rs9843653	C	T	3	49920571	0.000167843	77.5756	60.9006	3.59998e-20	0.7186
HC	FL	rs9850529	A	G	3	148776611	5.91489e-05	27.3352	60.9006	4.49997e-08	0.5075
HC	FL	rs987237	G	A	6	50803050	0.000349776	161.693	60.9006	2.49977e-40	0.3376
HC	FL	rs9876664	T	G	3	85806313	9.69553e-05	44.8088	60.9006	2.90001e-12	0.708699
HC	FL	rs9951619	G	T	18	56882326	6.85141e-05	31.6636	60.9006	5.60003e-09	0.9971
HC	FL	rs9955276	T	C	18	1839339	7.57238e-05	34.9957	60.9006	8.40001e-10	0.8228
HC	FL	rs9967287	T	G	18	63350718	7.5378e-05	34.8359	60.9006	7.79992e-10	0.8229
HC	FL	rs9967367	T	C	18	42606091	0.000125858	58.1682	60.9006	2.70023e-15	0.8933
HC	FL	rs998584	A	C	6	43757896	0.000247763	114.523	60.9006	5.90065e-29	0.0997608
HC	DLBCL	rs1006399	A	G	6	101039470	6.55144e-05	30.2772	53.3757	9.49992e-09	0.5234
HC	DLBCL	rs10100245	A	G	8	77226919	0.000207407	95.8655	53.3757	1.80011e-24	0.1138
HC	DLBCL	rs10118701	G	A	9	103061366	0.000123353	57.0103	53.3757	3.10027e-15	0.9787
HC	DLBCL	rs10132514	T	C	14	104012189	6.858e-05	31.694	53.3757	5.60003e-09	0.4584
HC	DLBCL	rs10145154	T	C	14	79939525	0.000222412	102.803	53.3757	4.60045e-26	0.04372
HC	DLBCL	rs10153248	G	A	17	407402	0.000124806	57.6819	53.3757	2.60016e-15	0.1937
HC	DLBCL	rs10172196	A	G	2	36780549	0.000129102	59.6679	53.3757	7.39946e-16	0.2502
HC	DLBCL	rs10188429	A	G	2	142297550	6.53225e-05	30.1885	53.3757	8.9e-09	0.773101
HC	DLBCL	rs10210468	C	T	2	165377103	9.41521e-05	43.5132	53.3757	9.60064e-12	0.609901
HC	DLBCL	rs1023767	A	G	8	95530969	8.48102e-05	39.1954	53.3757	6.20012e-11	0.3316
HC	DLBCL	rs1037702	A	G	4	180168024	6.34876e-05	29.3404	53.3757	1.7e-08	0.8939
HC	DLBCL	rs10404726	T	C	19	18834514	0.000137883	63.7268	53.3757	9.60064e-17	0.2099
HC	DLBCL	rs10407871	C	T	19	4040007	8.69304e-05	40.1754	53.3757	4.70002e-11	0.1405
HC	DLBCL	rs10471636	A	G	5	63979856	6.99725e-05	32.3376	53.3757	5.69994e-09	0.4703
HC	DLBCL	rs1047891	A	C	2	211540507	0.000119107	55.0477	53.3757	7.8001e-15	0.4637
HC	DLBCL	rs10499343	T	A	7	6419994	7.20966e-05	33.3193	53.3757	1.7e-09	0.696
HC	DLBCL	rs1056441	C	T	20	62370349	9.39471e-05	43.4185	53.3757	6.59933e-12	0.0418004
HC	DLBCL	rs1056720	T	C	20	3784110	6.13401e-05	28.3479	53.3757	2.80001e-08	0.2442
HC	DLBCL	rs10744145	A	C	12	17209445	7.33707e-05	33.9082	53.3757	1.29999e-09	0.4649
HC	DLBCL	rs10746833	G	A	9	90841862	0.000108659	50.2183	53.3757	2.19989e-13	0.7796
HC	DLBCL	rs10773051	T	C	12	124510391	0.000185091	85.5494	53.3757	5.90065e-22	0.9422
HC	DLBCL	rs10788797	A	G	1	151003071	8.72519e-05	40.3239	53.3757	3.10027e-11	0.4082
HC	DLBCL	rs10883553	A	C	10	102635475	0.000112737	52.1032	53.3757	5.19996e-14	0.9532
HC	DLBCL	rs10947137	C	A	6	31094971	5.89911e-05	27.2623	53.3757	4.79999e-08	0.0957304
HC	DLBCL	rs10987417	T	G	9	129462501	7.7729e-05	35.9225	53.3757	6.1e-10	0.9125
HC	DLBCL	rs11012732	G	A	10	21830104	0.000178913	82.6932	53.3757	2.49977e-21	0.9494
HC	DLBCL	rs11030016	T	C	11	27487992	0.000126757	58.5837	53.3757	1.59993e-15	0.1494
HC	DLBCL	rs11045163	G	A	12	20463526	6.43017e-05	29.7167	53.3757	1.29999e-08	0.5412
HC	DLBCL	rs11056870	T	G	12	16465953	7.33851e-05	33.9148	53.3757	1.2e-09	0.0430596
HC	DLBCL	rs11075252	G	A	16	9332571	6.42424e-05	29.6893	53.3757	1.40001e-08	0.3904
HC	DLBCL	rs1108548	G	A	1	218634787	9.81839e-05	45.3767	53.3757	2.09991e-12	0.6665
HC	DLBCL	rs11107114	A	G	12	93972927	6.26647e-05	28.9601	53.3757	2e-08	0.3372
HC	DLBCL	rs11113445	G	A	12	108088682	7.74462e-05	35.7918	53.3757	4e-10	0.8084
HC	DLBCL	rs11150745	G	A	17	78757626	0.000178228	82.3765	53.3757	3.40017e-21	0.4391
HC	DLBCL	rs11164630	T	C	1	103352995	9.08843e-05	42.0028	53.3757	1.29987e-11	0.761001
HC	DLBCL	rs11165643	T	C	1	96924097	0.000166027	76.7362	53.3757	4.70002e-20	0.1216
HC	DLBCL	rs11173522	A	C	12	60953472	6.31557e-05	29.187	53.3757	1.7e-08	0.3645
HC	DLBCL	rs1123295	G	A	1	33910453	7.05693e-05	32.6134	53.3757	2.5e-09	0.5441
HC	DLBCL	rs11263719	T	C	15	27220222	6.58689e-05	30.441	53.3757	1e-08	0.4242
HC	DLBCL	rs112875651	A	G	8	126506694	0.000158899	73.4415	53.3757	1e-18	0.9302
HC	DLBCL	rs113230003	A	G	19	18460956	8.50707e-05	39.3158	53.3757	8.99912e-11	0.617701
HC	DLBCL	rs113866544	C	T	17	46270606	0.00013938	64.4184	53.3757	6.20012e-17	0.0516202
HC	DLBCL	rs116072427	C	G	2	33357096	0.00010667	49.299	53.3757	2.39994e-13	0.701
HC	DLBCL	rs11704728	T	C	22	18130209	6.94312e-05	32.0874	53.3757	4.20001e-09	0.3081
HC	DLBCL	rs117342986	T	C	16	54267868	6.52719e-05	30.1651	53.3757	4.70002e-08	0.8298
HC	DLBCL	rs11751684	T	G	6	33528739	0.000111731	51.6381	53.3757	5.19996e-14	0.8074
HC	DLBCL	rs11762444	A	G	7	121979467	7.2218e-05	33.3754	53.3757	1.6e-09	0.2219
HC	DLBCL	rs11779446	G	A	8	23388326	0.000110138	50.9021	53.3757	1.20005e-13	0.00561901
HC	DLBCL	rs1182199	A	C	7	2862542	0.0002574	118.979	53.3757	5.40008e-30	0.9349
HC	DLBCL	rs11997077	G	A	8	2935385	6.00603e-05	27.7564	53.3757	4.70002e-08	0.0633797
HC	DLBCL	rs12072739	G	A	1	98315893	7.8235e-05	36.1564	53.3757	3.40001e-10	0.7996
HC	DLBCL	rs12096864	C	T	1	209439141	7.52463e-05	34.7751	53.3757	1.09999e-09	0.4804
HC	DLBCL	rs12122361	G	A	1	174933414	7.40058e-05	34.2017	53.3757	1.09999e-09	0.0929309
HC	DLBCL	rs12128526	A	G	1	7723957	6.41515e-05	29.6473	53.3757	1.2e-08	0.5512
HC	DLBCL	rs12140153	T	G	1	62579891	0.000119532	55.2441	53.3757	3.29989e-14	0.8566
HC	DLBCL	rs12245654	C	A	10	87562928	6.05902e-05	28.0013	53.3757	4.09996e-08	0.6689
HC	DLBCL	rs12364470	G	T	11	134601012	8.79047e-05	40.6256	53.3757	2.80027e-11	0.6762
HC	DLBCL	rs12375196	A	C	7	103416541	0.00013722	63.4203	53.3757	1.39991e-16	0.7791
HC	DLBCL	rs12427047	T	C	12	90213070	9.88714e-05	45.6945	53.3757	1.69981e-12	0.737801
HC	DLBCL	rs12441543	A	G	15	31689543	9.49967e-05	43.9035	53.3757	5.30029e-12	0.3617
HC	DLBCL	rs12462975	A	G	19	30272202	0.000158001	73.0264	53.3757	8.99912e-19	0.4788
HC	DLBCL	rs12519997	A	G	5	173351858	9.66005e-05	44.6448	53.3757	2.90001e-12	0.8734
HC	DLBCL	rs12568411	A	G	1	22622329	7.54835e-05	34.8847	53.3757	9.40005e-10	0.1298
HC	DLBCL	rs12569355	G	A	1	11923737	9.95257e-05	45.9969	53.3757	1.59993e-12	0.3129
HC	DLBCL	rs1260326	C	T	2	27730940	6.92932e-05	32.0236	53.3757	2.99999e-09	0.5283
HC	DLBCL	rs12607512	G	A	18	31259579	6.86334e-05	31.7187	53.3757	4.39997e-09	0.4359
HC	DLBCL	rs12762744	T	C	10	53669252	6.619e-05	30.5894	53.3757	8.40001e-09	0.929
HC	DLBCL	rs12831185	G	A	12	53860781	8.79755e-05	40.6584	53.3757	3.10027e-11	0.8531
HC	DLBCL	rs1285992	G	A	14	91520438	0.000169803	78.4817	53.3757	2.90001e-20	0.2163
HC	DLBCL	rs12880641	G	T	14	103251452	9.96277e-05	46.0441	53.3757	1.39991e-12	0.1681
HC	DLBCL	rs12881629	G	A	14	101146413	8.41821e-05	38.9051	53.3757	7.39946e-11	0.9822
HC	DLBCL	rs12883788	T	C	14	33303540	0.000102815	47.5174	53.3757	7.89951e-13	0.9522
HC	DLBCL	rs12921916	C	T	16	20407196	6.50036e-05	30.0411	53.3757	1.6e-08	1
HC	DLBCL	rs12939848	T	C	17	65370808	7.67539e-05	35.4719	53.3757	5.60003e-10	0.5292
HC	DLBCL	rs1294438	T	C	6	6752059	0.000158807	73.3987	53.3757	9.70063e-19	0.9673
HC	DLBCL	rs1296328	C	A	4	137083193	0.000123314	56.9922	53.3757	4.19952e-15	0.4777
HC	DLBCL	rs13017207	A	G	2	100841235	0.000124584	57.5791	53.3757	1.99986e-15	0.776101
HC	DLBCL	rs13034765	C	G	2	50742419	8.33936e-05	38.5406	53.3757	9.09913e-11	0.2764
HC	DLBCL	rs13081528	T	G	3	78505164	6.09174e-05	28.1526	53.3757	3.2e-08	0.1491
HC	DLBCL	rs13148263	A	G	4	1699512	0.000113285	52.3567	53.3757	3.59998e-14	0.8989
HC	DLBCL	rs13156484	A	G	5	122653399	0.000152508	70.4868	53.3757	3.90032e-18	0.1439
HC	DLBCL	rs13204087	A	G	6	163005021	6.93497e-05	32.0498	53.3757	3.59998e-09	0.5748
HC	DLBCL	rs13284988	C	T	9	14766563	6.18743e-05	28.5948	53.3757	2.99999e-08	0.9836
HC	DLBCL	rs13292699	C	A	9	15910044	0.000130081	60.1202	53.3757	6.70039e-16	0.3699
HC	DLBCL	rs13333747	C	T	16	2175373	0.000144161	66.6288	53.3757	2.29985e-17	0.5123
HC	DLBCL	rs13389219	T	C	2	165528876	0.000247002	114.171	53.3757	4.70002e-29	0.0156498
HC	DLBCL	rs139218003	T	G	5	50954977	0.000118195	54.6262	53.3757	1.20005e-14	0.902
HC	DLBCL	rs141622900	A	G	19	45426792	0.00010104	46.697	53.3757	3.59998e-12	0.00974608
HC	DLBCL	rs143384	G	A	20	34025756	0.000344704	159.348	53.3757	1.29987e-39	0.0557802
HC	DLBCL	rs143786003	A	C	12	124695007	6.64924e-05	30.7292	53.3757	1.79999e-08	0.1895
HC	DLBCL	rs1446585	G	A	2	136407479	6.10066e-05	28.1938	53.3757	1.5e-08	0.4611
HC	DLBCL	rs1452082	A	C	3	62465039	7.81718e-05	36.1272	53.3757	6.80002e-10	0.8297
HC	DLBCL	rs1458156	T	C	12	41887940	7.9953e-05	36.9505	53.3757	2.30001e-10	0.1723
HC	DLBCL	rs1477290	C	T	5	87988934	0.00021081	97.4388	53.3757	1.59993e-24	0.9074
HC	DLBCL	rs147730268	T	G	12	123024476	0.000407877	188.563	53.3757	1.29987e-44	0.8872
HC	DLBCL	rs1480474	G	A	12	66326943	0.000102395	47.3229	53.3757	7.39946e-13	0.9978
HC	DLBCL	rs1481630	C	T	2	183097705	6.89861e-05	31.8817	53.3757	4e-09	0.9319
HC	DLBCL	rs1514895	G	A	3	170705693	0.000124456	57.5202	53.3757	2.09991e-15	0.23
HC	DLBCL	rs1538535	T	C	9	35681299	6.16338e-05	28.4836	53.3757	2.69998e-08	0.9246
HC	DLBCL	rs1576655	C	A	13	79587841	0.000125334	57.9258	53.3757	7.70016e-15	0.0224202
HC	DLBCL	rs1609783	A	G	3	25095911	0.000101579	46.946	53.3757	1.10002e-12	0.6519
HC	DLBCL	rs170016	A	G	7	32446317	6.29888e-05	29.1099	53.3757	2.59998e-08	0.0138998
HC	DLBCL	rs1727901	T	C	3	153832678	0.000162131	74.9351	53.3757	1.50003e-19	0.2807
HC	DLBCL	rs17361789	G	T	1	172122601	6.97665e-05	32.2424	53.3757	4e-09	0.3542
HC	DLBCL	rs17604662	G	A	16	72221464	6.3789e-05	29.4797	53.3757	1.5e-08	0.1894
HC	DLBCL	rs17639546	A	G	3	61251635	8.90962e-05	41.1764	53.3757	1.99986e-11	0.5021
HC	DLBCL	rs17733217	G	A	20	51222704	8.82504e-05	40.7854	53.3757	3.10027e-11	0.5012
HC	DLBCL	rs17766836	T	C	7	92258961	0.000211712	97.8559	53.3757	6.09958e-25	0.4229
HC	DLBCL	rs17770336	T	C	9	28414625	0.000160173	74.0302	53.3757	2.39994e-19	0.580899
HC	DLBCL	rs1801123	C	T	2	227661043	7.27839e-05	33.637	53.3757	1.2e-09	0.2197
HC	DLBCL	rs1813212	G	A	11	89301382	8.36042e-05	38.638	53.3757	9.20026e-11	0.1626
HC	DLBCL	rs186017271	A	G	15	83368605	7.36609e-05	34.0423	53.3757	4.70002e-09	0.6773
HC	DLBCL	rs1868069	A	G	2	205388946	8.05213e-05	37.2131	53.3757	1.89998e-10	0.6086
HC	DLBCL	rs190543502	C	T	15	43757184	7.47115e-05	34.5279	53.3757	1.2e-09	0.6262
HC	DLBCL	rs1955695	G	A	14	61021891	0.000137855	63.7134	53.3757	8.9002e-17	0.1702
HC	DLBCL	rs1982441	T	G	8	28021769	6.56992e-05	30.3626	53.3757	9.69996e-09	0.587801
HC	DLBCL	rs2022050	A	G	11	64367651	0.0001177	54.3973	53.3757	1.69981e-14	0.671001
HC	DLBCL	rs2023211	C	T	14	62374092	9.17368e-05	42.3968	53.3757	1.10002e-11	0.1203
HC	DLBCL	rs211434	A	G	6	133611571	7.48224e-05	34.5792	53.3757	8.60003e-10	0.682801
HC	DLBCL	rs2133292	T	C	12	103048184	8.19182e-05	37.8587	53.3757	1.5e-10	0.1728
HC	DLBCL	rs2151248	C	G	1	170330098	8.77643e-05	40.5608	53.3757	2.60016e-11	0.6965
HC	DLBCL	rs2159437	G	A	17	68439660	0.000192315	88.8886	53.3757	8.9002e-23	0.4032
HC	DLBCL	rs2172131	C	T	10	133978962	9.13799e-05	42.2319	53.3757	1.20005e-11	0.8384
HC	DLBCL	rs2238689	C	T	19	46178661	9.62722e-05	44.4931	53.3757	3.59998e-12	0.1386
HC	DLBCL	rs2288745	T	C	2	241728843	7.83202e-05	36.1958	53.3757	3.50002e-10	0.8297
HC	DLBCL	rs2479958	G	A	13	111984244	8.42909e-05	38.9554	53.3757	1.2e-10	0.4669
HC	DLBCL	rs2494196	A	C	1	219762581	0.000399554	184.714	53.3757	6.89922e-46	0.9139
HC	DLBCL	rs2499468	A	C	6	51809081	7.89513e-05	36.4875	53.3757	2.80001e-10	0.4907
HC	DLBCL	rs253444	A	G	5	141793741	8.84507e-05	40.878	53.3757	2.49977e-11	0.3552
HC	DLBCL	rs2577955	T	C	15	42012178	6.81211e-05	31.4819	53.3757	4.79999e-09	0.8553
HC	DLBCL	rs2585526	G	A	13	78624080	7.4244e-05	34.3118	53.3757	1.09999e-09	0.1281
HC	DLBCL	rs2606227	C	T	3	183536836	7.19697e-05	33.2607	53.3757	2.39999e-09	0.7001
HC	DLBCL	rs2642305	T	A	10	27909292	5.95455e-05	27.5185	53.3757	4.49997e-08	0.5801
HC	DLBCL	rs2660241	C	T	16	4940023	8.97312e-05	41.4699	53.3757	1.9002e-11	0.645
HC	DLBCL	rs2678204	G	T	1	201800511	0.000173772	80.3166	53.3757	7.10068e-21	0.609901
HC	DLBCL	rs273505	C	T	19	18217147	8.0848e-05	37.3641	53.3757	1.89998e-10	0.1396
HC	DLBCL	rs2737263	T	G	8	116667539	0.000225944	104.436	53.3757	1.59993e-26	0.3104
HC	DLBCL	rs2744956	C	T	6	34618937	0.000692778	320.365	53.3757	2.80027e-78	0.9451
HC	DLBCL	rs2814350	A	G	10	88008785	8.15771e-05	37.7011	53.3757	3.40001e-10	0.2611
HC	DLBCL	rs2821226	G	A	1	203517292	0.000114226	52.7917	53.3757	4.30031e-14	0.3297
HC	DLBCL	rs28366156	C	T	6	31671498	0.00016037	74.1215	53.3757	2.19989e-19	0.3227
HC	DLBCL	rs2861685	C	T	2	67837553	0.000105799	48.8967	53.3757	2.29985e-13	0.758501
HC	DLBCL	rs28711392	C	T	11	13349559	7.28789e-05	33.6809	53.3757	1.89998e-09	0.1948
HC	DLBCL	rs28778940	A	G	9	98298352	0.000101644	46.976	53.3757	9.70063e-13	0.8143
HC	DLBCL	rs287837	G	A	6	83430793	8.53226e-05	39.4322	53.3757	6.4998e-11	0.4177
HC	DLBCL	rs2897968	A	G	12	46763686	7.18959e-05	33.2266	53.3757	1.89998e-09	0.02391
HC	DLBCL	rs3012053	G	A	10	77293109	9.13644e-05	42.2247	53.3757	1.20005e-11	0.8349
HC	DLBCL	rs308911	G	A	2	86855977	8.31626e-05	38.4339	53.3757	9.70063e-11	0.4825
HC	DLBCL	rs310796	T	G	12	77453226	6.37065e-05	29.4416	53.3757	1.6e-08	0.0109799
HC	DLBCL	rs3110942	A	G	7	33003171	8.06926e-05	37.2923	53.3757	2e-10	0.8513
HC	DLBCL	rs3116600	G	A	13	51107900	0.000119036	55.0149	53.3757	1e-14	0.778001
HC	DLBCL	rs314288	C	T	6	105434078	0.000103992	48.061	53.3757	4.60045e-13	0.4237
HC	DLBCL	rs329118	T	C	5	133861663	0.000130153	60.1536	53.3757	5.79963e-16	0.8673
HC	DLBCL	rs33503	A	G	3	42427957	9.58251e-05	44.2865	53.3757	3.40017e-12	0.4916
HC	DLBCL	rs340025	C	T	15	60908307	7.90868e-05	36.5501	53.3757	3.29997e-10	0.2523
HC	DLBCL	rs34045894	A	G	10	33967489	7.39489e-05	34.1754	53.3757	1.09999e-09	0.2299
HC	DLBCL	rs34223321	A	C	17	38352388	8.34248e-05	38.5551	53.3757	8.80035e-11	0.2326
HC	DLBCL	rs34505073	A	G	13	50237255	0.000141895	65.5811	53.3757	5.50047e-17	0.7334
HC	DLBCL	rs34594435	T	C	7	72977249	0.000146517	67.7177	53.3757	8.60003e-18	0.2172
HC	DLBCL	rs34629844	G	A	5	200829	0.000101421	46.8731	53.3757	8.30042e-13	0.9531
HC	DLBCL	rs34656389	G	A	4	96153214	5.93281e-05	27.4181	53.3757	4.60002e-08	0.6656
HC	DLBCL	rs34765854	G	T	6	40368860	0.000156439	72.304	53.3757	5.50047e-19	0.2213
HC	DLBCL	rs34769775	T	C	15	80989172	8.32257e-05	38.463	53.3757	1e-10	0.4224
HC	DLBCL	rs34772064	G	T	4	55495948	6.96095e-05	32.1698	53.3757	3.09999e-09	0.6163
HC	DLBCL	rs34811474	A	G	4	25408838	0.000139072	64.276	53.3757	5.40008e-17	0.0900803
HC	DLBCL	rs34840745	T	C	19	7183797	0.000107247	49.5658	53.3757	2.39994e-13	0.709999
HC	DLBCL	rs34848742	G	T	4	123828042	6.88441e-05	31.8161	53.3757	3.69999e-09	0.9355
HC	DLBCL	rs35506085	A	G	11	2165576	0.000126519	58.4738	53.3757	2.39994e-15	0.8921
HC	DLBCL	rs35537311	T	C	17	71126150	0.000103581	47.8714	53.3757	6.00067e-13	0.2972
HC	DLBCL	rs35589824	C	T	3	181090035	6.31007e-05	29.1616	53.3757	2.59998e-08	0.4749
HC	DLBCL	rs35882248	T	C	2	230627955	0.000106339	49.1462	53.3757	2.29985e-13	0.4654
HC	DLBCL	rs35917007	G	A	19	1849147	0.000108388	50.093	53.3757	1.50003e-13	0.7392
HC	DLBCL	rs35957544	T	G	8	73440371	0.000181385	83.8361	53.3757	1.50003e-21	0.5362
HC	DLBCL	rs36140	C	A	5	66164160	0.000102095	47.1845	53.3757	9.49948e-13	0.550399
HC	DLBCL	rs365352	A	G	5	77401152	0.000155793	72.0056	53.3757	6.59933e-19	0.1819
HC	DLBCL	rs3730071	A	C	12	49168798	8.01988e-05	37.0641	53.3757	2.1e-10	0.8493
HC	DLBCL	rs3737992	A	G	1	33234128	0.000129973	60.0701	53.3757	4.90004e-16	0.8254
HC	DLBCL	rs3746759	G	T	20	61560004	6.85658e-05	31.6874	53.3757	4.39997e-09	0.8114
HC	DLBCL	rs3762988	T	C	5	32709653	7.60067e-05	35.1265	53.3757	6.49995e-10	0.7791
HC	DLBCL	rs3807566	T	G	7	50564204	0.000110036	50.855	53.3757	1.10002e-13	0.5088
HC	DLBCL	rs3811951	G	A	5	95762477	9.13468e-05	42.2166	53.3757	1.10002e-11	0.2037
HC	DLBCL	rs3826408	T	C	17	7101292	9.1638e-05	42.3512	53.3757	1.10002e-11	0.0923996
HC	DLBCL	rs3845344	T	C	1	75001480	9.16349e-05	42.3497	53.3757	9.70063e-12	0.2245
HC	DLBCL	rs3935190	A	G	17	79084367	9.9051e-05	45.7775	53.3757	2.29985e-12	0.4417
HC	DLBCL	rs394608	C	T	21	46581798	0.000106134	49.0513	53.3757	3.59998e-13	0.8076
HC	DLBCL	rs40071	C	T	5	107496102	8.92842e-05	41.2633	53.3757	2.19989e-11	0.8031
HC	DLBCL	rs4017425	T	C	3	44028764	6.98165e-05	32.2655	53.3757	3.09999e-09	0.8251
HC	DLBCL	rs41271299	T	C	6	19839415	0.000144424	66.7502	53.3757	1.29987e-17	0.3888
HC	DLBCL	rs41273794	T	C	6	41755708	0.000150024	69.3388	53.3757	3.50026e-18	0.7042
HC	DLBCL	rs41279738	G	T	1	110082551	0.000182124	84.1774	53.3757	1.20005e-21	0.6962
HC	DLBCL	rs4240326	G	A	4	145839264	0.00038617	178.524	53.3757	2.70023e-44	0.773101
HC	DLBCL	rs4253755	A	G	22	46615376	0.000100033	46.2314	53.3757	1.99986e-12	0.7587
HC	DLBCL	rs429343	G	A	2	147903382	7.26315e-05	33.5665	53.3757	1.40001e-09	0.0287799
HC	DLBCL	rs4310395	G	A	1	232795105	7.36684e-05	34.0458	53.3757	1e-09	0.3443
HC	DLBCL	rs4339309	G	A	5	22208931	6.4435e-05	29.7783	53.3757	1.40001e-08	0.4409
HC	DLBCL	rs4350264	A	G	10	70242946	7.39982e-05	34.1982	53.3757	1e-09	0.8395
HC	DLBCL	rs4467770	A	G	6	12086826	9.91335e-05	45.8156	53.3757	1.80011e-12	0.9375
HC	DLBCL	rs4476935	T	C	7	112987650	8.13788e-05	37.6094	53.3757	1.5e-10	0.6844
HC	DLBCL	rs4486868	C	T	15	99472734	6.09934e-05	28.1877	53.3757	3.40001e-08	0.7602
HC	DLBCL	rs4567604	T	G	13	59204270	8.67719e-05	40.1021	53.3757	5.00035e-11	0.2308
HC	DLBCL	rs4589131	G	T	1	161167698	6.65914e-05	30.7749	53.3757	6.4e-09	0.0678094
HC	DLBCL	rs4613074	C	T	16	19942527	8.74372e-05	40.4096	53.3757	3.29989e-11	0.8381
HC	DLBCL	rs463376	A	G	19	34318210	7.18914e-05	33.2245	53.3757	1.89998e-09	0.1933
HC	DLBCL	rs4678016	T	C	3	123101981	6.15448e-05	28.4425	53.3757	2.5e-08	0.2628
HC	DLBCL	rs475390	A	G	1	41570459	6.86924e-05	31.746	53.3757	3.89996e-09	0.8159
HC	DLBCL	rs4790292	A	C	17	1824305	0.000178423	82.4666	53.3757	4.10015e-21	0.4137
HC	DLBCL	rs4792716	G	A	17	15943144	0.000104365	48.2337	53.3757	4.60045e-13	0.9985
HC	DLBCL	rs4800490	C	A	18	21126081	0.000268446	124.086	53.3757	3.59998e-31	0.2454
HC	DLBCL	rs483465	G	A	3	136047977	9.01774e-05	41.6761	53.3757	1.50003e-11	0.5081
HC	DLBCL	rs4870057	G	A	6	152171898	7.24282e-05	33.4726	53.3757	2.39999e-09	0.788501
HC	DLBCL	rs4909309	C	T	8	135619272	0.000143801	66.462	53.3757	1.69981e-17	0.03093
HC	DLBCL	rs4963975	A	G	12	26443030	0.000130393	60.2643	53.3757	6.09958e-16	0.9707
HC	DLBCL	rs4976994	G	A	8	143373494	8.16738e-05	37.7458	53.3757	1.5e-10	0.783599
HC	DLBCL	rs4985407	G	A	16	70285901	0.000117082	54.1118	53.3757	1.80011e-14	0.9257
HC	DLBCL	rs522110	G	A	10	99772885	0.000162162	74.9495	53.3757	1.69981e-19	0.6032
HC	DLBCL	rs551935	G	T	11	30500832	0.000141218	65.2684	53.3757	3.10027e-17	0.5072
HC	DLBCL	rs55707359	G	T	11	46159333	6.38194e-05	29.4938	53.3757	2.19999e-08	0.4547
HC	DLBCL	rs55726687	A	G	12	991306	0.00015778	72.9242	53.3757	4.49987e-19	0.0596994
HC	DLBCL	rs56094641	G	A	16	53806453	0.00183013	847.283	53.3757	1e-200	0.1737
HC	DLBCL	rs56399737	T	C	13	33381721	6.91349e-05	31.9505	53.3757	4.30002e-09	0.9962
HC	DLBCL	rs57235969	T	C	2	204105403	7.67346e-05	35.4629	53.3757	4.60002e-10	0.7715
HC	DLBCL	rs57636386	C	T	18	58048295	0.000189055	87.3818	53.3757	2.60016e-22	0.704399
HC	DLBCL	rs57989773	C	T	6	100629078	0.000177015	81.8156	53.3757	4.00037e-20	0.0612407
HC	DLBCL	rs58584712	A	G	2	112249583	9.60426e-05	44.387	53.3757	3.19963e-12	0.1502
HC	DLBCL	rs58862095	T	C	7	75081418	0.000159625	73.7771	53.3757	3.69999e-19	0.4959
HC	DLBCL	rs59227842	G	A	11	43692423	0.000189566	87.6178	53.3757	3.40017e-22	0.2944
HC	DLBCL	rs60226453	T	C	1	203489683	7.72381e-05	35.6956	53.3757	3.89996e-10	0.2815
HC	DLBCL	rs6066104	T	C	20	45530530	0.000162915	75.2975	53.3757	1.69981e-19	0.0506198
HC	DLBCL	rs6142059	C	T	20	32544327	0.000112424	51.9587	53.3757	6.4998e-14	0.9797
HC	DLBCL	rs614520	A	G	11	65664006	7.81431e-05	36.1139	53.3757	8e-10	0.6148
HC	DLBCL	rs61941722	A	G	12	97555085	7.45167e-05	34.4378	53.3757	1.2e-09	0.1679
HC	DLBCL	rs61969510	C	T	13	86484025	6.63685e-05	30.6719	53.3757	1e-08	0.2324
HC	DLBCL	rs61992671	G	A	14	101531854	0.000115115	53.2026	53.3757	3.40017e-13	0.0524397
HC	DLBCL	rs62070648	A	G	17	29210595	0.00015633	72.2535	53.3757	7.8001e-19	0.3653
HC	DLBCL	rs62107261	C	T	2	422144	0.000601149	277.967	53.3757	1.10002e-67	0.8256
HC	DLBCL	rs62246311	A	G	3	9498143	9.03632e-05	41.762	53.3757	1.39991e-11	0.2093
HC	DLBCL	rs62301134	C	T	4	68441583	7.21536e-05	33.3457	53.3757	1.79999e-09	0.7122
HC	DLBCL	rs62425398	A	C	6	166416028	0.000117465	54.2887	53.3757	1.9002e-14	0.5888
HC	DLBCL	rs62515438	G	T	8	57161608	7.95424e-05	36.7607	53.3757	2.5e-10	0.2069
HC	DLBCL	rs643499	C	T	11	121938945	6.8517e-05	31.6649	53.3757	4.90004e-09	0.9804
HC	DLBCL	rs6438656	A	G	3	121485239	6.62375e-05	30.6114	53.3757	7.19996e-09	0.0277102
HC	DLBCL	rs6465828	T	G	7	77421817	0.000134171	62.0107	53.3757	1.9002e-16	0.732
HC	DLBCL	rs6470771	C	A	8	130743726	6.72363e-05	31.073	53.3757	5.80003e-09	0.630001
HC	DLBCL	rs6545714	A	G	2	59307725	0.000120086	55.5003	53.3757	7.10068e-15	0.764599
HC	DLBCL	rs6575340	A	G	14	94023972	0.000157681	72.8781	53.3757	6.70039e-19	0.679599
HC	DLBCL	rs6598540	G	A	15	99230191	8.75653e-05	40.4688	53.3757	3.40017e-11	0.681999
HC	DLBCL	rs66679256	T	C	4	18351898	0.000111032	51.3151	53.3757	7.50067e-14	0.9983
HC	DLBCL	rs6669341	G	A	1	47678458	0.000111313	51.4451	53.3757	6.09958e-14	0.567799
HC	DLBCL	rs6712653	T	C	2	242534233	6.83065e-05	31.5676	53.3757	4.30002e-09	0.8404
HC	DLBCL	rs6745626	T	C	2	181436641	9.38992e-05	43.3963	53.3757	6.00067e-12	0.2557
HC	DLBCL	rs6747657	A	G	2	112003163	6.77044e-05	31.2893	53.3757	4.70002e-09	0.4069
HC	DLBCL	rs675162	G	A	6	160776325	0.000161933	74.844	53.3757	1.80011e-19	0.115
HC	DLBCL	rs67560975	C	T	17	47142930	9.11892e-05	42.1437	53.3757	1.50003e-11	0.3613
HC	DLBCL	rs6840236	C	T	4	56289785	0.000143489	66.3177	53.3757	1.9002e-17	0.8381
HC	DLBCL	rs6868125	T	C	5	164472399	7.12558e-05	32.9307	53.3757	1.89998e-09	0.9334
HC	DLBCL	rs6946415	G	A	7	150684548	0.000117978	54.5261	53.3757	1.39991e-14	0.3308
HC	DLBCL	rs6958365	T	C	7	33955171	6.44863e-05	29.802	53.3757	1.5e-08	0.5046
HC	DLBCL	rs6973700	G	A	7	1856669	8.15282e-05	37.6785	53.3757	1.5e-10	0.824
HC	DLBCL	rs698147	G	A	5	3513485	7.31883e-05	33.8239	53.3757	1.29999e-09	0.3792
HC	DLBCL	rs7002088	C	A	8	10494738	9.2952e-05	42.9585	53.3757	7.89951e-12	0.6878
HC	DLBCL	rs7034554	G	A	9	37081301	7.22391e-05	33.3852	53.3757	1.6e-09	0.0537106
HC	DLBCL	rs7038943	C	T	9	120377178	6.56895e-05	30.3581	53.3757	8.60003e-09	0.2298
HC	DLBCL	rs705165	T	G	10	125256095	8.17224e-05	37.7682	53.3757	1.40001e-10	0.704301
HC	DLBCL	rs7094073	T	C	10	75704501	8.26825e-05	38.212	53.3757	2.30001e-09	0.4275
HC	DLBCL	rs7111235	C	T	11	133658661	6.65915e-05	30.775	53.3757	8.40001e-09	0.2393
HC	DLBCL	rs71413981	A	G	14	23774916	0.000122474	56.6038	53.3757	5.30029e-15	0.1693
HC	DLBCL	rs7171864	A	G	15	73227249	0.000117728	54.4104	53.3757	1.9002e-14	0.02016
HC	DLBCL	rs7218014	C	T	17	65832016	0.000136605	63.1359	53.3757	1.29987e-16	0.8611
HC	DLBCL	rs7248205	T	C	19	10770305	0.000124701	57.6335	53.3757	2.99985e-15	0.8331
HC	DLBCL	rs7257083	A	G	19	33943986	0.00010858	50.1819	53.3757	1.69981e-13	0.2815
HC	DLBCL	rs72634826	A	G	1	1601052	9.04242e-05	41.7901	53.3757	2.60016e-11	0.609799
HC	DLBCL	rs72656010	C	T	8	57122215	0.000146244	67.5915	53.3757	1.20005e-17	0.5939
HC	DLBCL	rs72681698	C	T	14	51207741	7.28853e-05	33.6838	53.3757	1.40001e-09	0.6348
HC	DLBCL	rs7274811	T	G	20	32333181	0.000145953	67.457	53.3757	1.10002e-17	0.4871
HC	DLBCL	rs72756476	C	T	9	95453880	8.99704e-05	41.5804	53.3757	2.09991e-11	0.4063
HC	DLBCL	rs72877553	C	T	6	76215658	6.03148e-05	27.874	53.3757	3.59998e-08	0.9225
HC	DLBCL	rs72959041	A	G	6	127454893	0.000410179	189.627	53.3757	9.49948e-46	0.5547
HC	DLBCL	rs73052033	C	T	3	185828465	0.000130547	60.3356	53.3757	5.30029e-16	0.825
HC	DLBCL	rs73175572	G	A	3	185490184	0.000157928	72.9926	53.3757	1e-18	0.0669407
HC	DLBCL	rs73197346	C	T	21	36770189	7.41356e-05	34.2617	53.3757	1.29999e-09	0.9439
HC	DLBCL	rs7365	G	A	11	93211764	6.14632e-05	28.4048	53.3757	2.59998e-08	0.8122
HC	DLBCL	rs73650963	C	T	9	93943033	7.83798e-05	36.2233	53.3757	4.09996e-10	0.1775
HC	DLBCL	rs7372674	A	C	3	196149165	9.46472e-05	43.7421	53.3757	4.60045e-12	0.1767
HC	DLBCL	rs7460093	A	G	8	144876159	9.29881e-05	42.9752	53.3757	1.20005e-11	5.11305e-05
HC	DLBCL	rs74749286	A	G	11	14322359	0.000128827	59.5408	53.3757	1.20005e-15	0.0950495
HC	DLBCL	rs750090	C	T	4	152931436	8.11303e-05	37.4946	53.3757	2.5e-10	0.0943909
HC	DLBCL	rs7519259	A	G	1	66434743	9.97053e-05	46.0799	53.3757	1.50003e-12	0.752
HC	DLBCL	rs7523668	A	G	1	42408159	9.24865e-05	42.7434	53.3757	8.60003e-12	0.8243
HC	DLBCL	rs75543804	T	G	2	111900904	9.77147e-05	45.1598	53.3757	2.49977e-12	0.7183
HC	DLBCL	rs756717	A	G	16	72996162	9.44133e-05	43.6339	53.3757	9.70063e-12	0.0728299
HC	DLBCL	rs7570446	A	C	2	193801010	6.01942e-05	27.8183	53.3757	3.29997e-08	0.843
HC	DLBCL	rs7571496	G	A	2	6169351	7.35499e-05	33.991	53.3757	1.2e-09	0.9334
HC	DLBCL	rs7582359	A	G	2	55286681	8.13921e-05	37.6156	53.3757	1.7e-10	0.508401
HC	DLBCL	rs76082446	A	G	3	71624342	7.34229e-05	33.9323	53.3757	1.29999e-09	0.1458
HC	DLBCL	rs76577501	A	G	7	26756958	6.93464e-05	32.0482	53.3757	3.50002e-09	0.6574
HC	DLBCL	rs76647086	T	G	1	23429461	0.000119073	55.0321	53.3757	8.00018e-15	0.9325
HC	DLBCL	rs76798800	T	G	1	154994978	0.000232937	107.669	53.3757	2.19989e-27	0.0664293
HC	DLBCL	rs76895963	G	T	12	4384844	0.000296913	137.249	53.3757	1.39991e-28	0.8363
HC	DLBCL	rs7696175	C	T	4	38820986	9.23129e-05	42.6631	53.3757	1.10002e-11	0.9593
HC	DLBCL	rs7707394	A	G	5	74472939	0.000156676	72.4137	53.3757	5.50047e-19	0.8597
HC	DLBCL	rs7708584	G	A	5	153543466	8.52428e-05	39.3953	53.3757	5.30029e-11	0.1438
HC	DLBCL	rs7793674	C	A	7	3128340	9.14325e-05	42.2562	53.3757	1.29987e-11	0.2397
HC	DLBCL	rs7805441	T	C	7	78121458	8.04454e-05	37.178	53.3757	2.5e-10	0.5129
HC	DLBCL	rs78058190	A	G	2	219699999	0.000116182	53.6957	53.3757	1.10002e-11	0.8055
HC	DLBCL	rs7824785	T	C	8	128114710	8.93498e-05	41.2936	53.3757	2.09991e-11	0.8451
HC	DLBCL	rs7864465	A	G	9	133808080	6.05109e-05	27.9647	53.3757	3.29997e-08	0.4091
HC	DLBCL	rs7893571	T	G	10	16750129	8.52093e-05	39.3799	53.3757	6.4998e-11	0.0976293
HC	DLBCL	rs7944782	G	T	11	130795698	8.39174e-05	38.7827	53.3757	9.8992e-11	0.3548
HC	DLBCL	rs7952436	T	C	11	67024534	0.000189266	87.4794	53.3757	1.59993e-22	0.1553
HC	DLBCL	rs7996639	A	G	13	97019090	9.307e-05	43.013	53.3757	1.10002e-11	0.745901
HC	DLBCL	rs8007429	A	G	14	35366743	7.97481e-05	36.8557	53.3757	3.40001e-10	0.7179
HC	DLBCL	rs8132129	T	C	21	17400916	7.64143e-05	35.3149	53.3757	8.40001e-10	0.7077
HC	DLBCL	rs8133137	G	A	21	40290503	0.000111061	51.3288	53.3757	8.80035e-14	0.2063
HC	DLBCL	rs815163	C	T	1	190294726	0.000140489	64.931	53.3757	3.19963e-17	0.5892
HC	DLBCL	rs852042	G	A	20	17091233	8.6521e-05	39.9861	53.3757	4.30031e-11	0.00522504
HC	DLBCL	rs852983	A	G	5	142712064	6.99373e-05	32.3213	53.3757	2.80001e-09	0.2118
HC	DLBCL	rs866006	G	T	5	112176559	6.86308e-05	31.7175	53.3757	4e-09	0.5634
HC	DLBCL	rs9284814	A	G	3	88273071	0.000108019	49.9226	53.3757	1.50003e-13	0.1515
HC	DLBCL	rs9378684	T	C	6	2110941	0.000104684	48.381	53.3757	5.79963e-13	0.0580805
HC	DLBCL	rs9385385	T	C	6	126122280	8.12317e-05	37.5415	53.3757	2e-10	0.9895
HC	DLBCL	rs9512696	G	A	13	28012527	0.000132656	61.3103	53.3757	3.59998e-16	0.0864092
HC	DLBCL	rs9513018	T	G	13	28640563	5.97123e-05	27.5956	53.3757	4.49997e-08	0.3889
HC	DLBCL	rs9611160	A	G	22	39747418	6.61238e-05	30.5588	53.3757	8.70001e-09	0.7907
HC	DLBCL	rs968379	T	C	2	172401050	0.000124622	57.5968	53.3757	2.39994e-15	0.1918
HC	DLBCL	rs9764678	C	T	5	118726662	0.000103127	47.6615	53.3757	7.59976e-13	0.3295
HC	DLBCL	rs9830592	A	C	3	104631603	9.31217e-05	43.0369	53.3757	7.10068e-12	0.9868
HC	DLBCL	rs9843653	C	T	3	49920571	0.000167843	77.5756	53.3757	3.59998e-20	0.5636
HC	DLBCL	rs9850529	A	G	3	148776611	5.91489e-05	27.3352	53.3757	4.49997e-08	0.85
HC	DLBCL	rs9951619	G	T	18	56882326	6.85141e-05	31.6636	53.3757	5.60003e-09	0.1659
HC	DLBCL	rs9955276	T	C	18	1839339	7.57238e-05	34.9957	53.3757	8.40001e-10	0.2139
HC	DLBCL	rs9967287	T	G	18	63350718	7.5378e-05	34.8359	53.3757	7.79992e-10	0.9301
HC	DLBCL	rs9967367	T	C	18	42606091	0.000125858	58.1682	53.3757	2.70023e-15	0.4128
HC	DLBCL	rs7944782	G	T	11	130795698	8.39174e-05	38.7827	53.3757	9.8992e-11	0.3548
HC	DLBCL	rs7002088	C	A	8	10494738	9.2952e-05	42.9585	53.3757	7.89951e-12	0.6878
HC	DLBCL	rs7034554	G	A	9	37081301	7.22391e-05	33.3852	53.3757	1.6e-09	0.0537106
HC	DLBCL	rs7038943	C	T	9	120377178	6.56895e-05	30.3581	53.3757	8.60003e-09	0.2298
HC	DLBCL	rs35537311	T	C	17	71126150	0.000103581	47.8714	53.3757	6.00067e-13	0.2972
HC	DLBCL	rs35589824	C	T	3	181090035	6.31007e-05	29.1616	53.3757	2.59998e-08	0.4749
HC	DLBCL	rs35882248	T	C	2	230627955	0.000106339	49.1462	53.3757	2.29985e-13	0.4654
SH	DLBCL	rs10010325	A	C	4	106106353	0.000241211	111.454	54.7866	1.50003e-63	0.9754
SH	DLBCL	rs10061757	C	G	5	56086805	8.03161e-05	37.1049	54.7866	2.90001e-22	0.9174
SH	DLBCL	rs1013495	T	C	10	81140253	0.000228883	105.756	54.7866	5.79963e-60	0.9083
SH	DLBCL	rs10233251	G	A	7	46211533	8.55778e-05	39.5359	54.7866	1.99986e-23	0.9493
SH	DLBCL	rs1043413	G	C	19	41939297	0.000174469	80.6098	54.7866	5.00035e-46	0.8005
SH	DLBCL	rs10498672	G	C	6	7797840	0.000116999	54.0539	54.7866	3.29989e-32	0.852
SH	DLBCL	rs1050969	C	T	8	103661730	3.33357e-05	15.3999	54.7866	1.5e-09	0.9325
SH	DLBCL	rs10922478	G	A	1	89144053	0.000177108	81.829	54.7866	7.59976e-48	0.7949
SH	DLBCL	rs10995319	C	T	10	52762887	7.07788e-05	32.6984	54.7866	1.20005e-19	0.9072
SH	DLBCL	rs11122824	T	A	2	121591475	4.62226e-05	21.3534	54.7866	1.9002e-13	0.8824
SH	DLBCL	rs112153300	A	G	21	47547474	9.44127e-05	43.6179	54.7866	2.29985e-25	0.8805
SH	DLBCL	rs11259936	C	A	15	84580582	0.000638447	295.118	54.7866	1e-164	0.791199
SH	DLBCL	rs113851505	T	C	16	341988	2.58476e-05	11.9405	54.7866	4.70002e-08	0.9226
SH	DLBCL	rs114784809	A	G	5	127674221	4.86468e-05	22.4734	54.7866	7.00003e-14	0.9318
SH	DLBCL	rs11747997	C	A	5	142790752	5.83765e-05	26.9685	54.7866	1.59993e-16	0.9413
SH	DLBCL	rs11775903	G	A	8	25321076	4.04994e-05	18.7094	54.7866	5.70033e-12	0.982
SH	DLBCL	rs12051048	A	C	16	783864	0.000251259	116.098	54.7866	2.39994e-65	0.8892
SH	DLBCL	rs12452505	G	C	17	63556402	0.00021691	100.223	54.7866	9.8992e-57	0.8526
SH	DLBCL	rs12903939	A	G	15	101641034	5.48325e-05	25.3311	54.7866	1.69981e-12	0.9971
SH	DLBCL	rs12952981	A	G	17	79409189	6.90859e-05	31.9163	54.7866	2.99985e-19	0.9978
SH	DLBCL	rs13168903	G	T	5	158517233	3.11366e-05	14.3839	54.7866	1.5e-09	0.9747
SH	DLBCL	rs138198562	C	T	12	46429309	4.35046e-05	20.0977	54.7866	2.90001e-12	0.9145
SH	DLBCL	rs144351518	G	A	4	1893651	8.38102e-05	38.7192	54.7866	1.20005e-21	0.8498
SH	DLBCL	rs1443536	G	A	4	82174165	0.000431828	199.568	54.7866	2.30144e-112	0.8428
SH	DLBCL	rs1443749	T	C	7	121960438	6.47301e-05	29.9039	54.7866	2.49977e-18	0.9841
SH	DLBCL	rs147176253	A	G	16	3946485	4.0288e-05	18.6117	54.7866	1.99986e-11	0.9838
SH	DLBCL	rs1474647	T	C	1	22441865	8.7885e-05	40.6019	54.7866	1.59993e-24	0.897
SH	DLBCL	rs1490384	T	C	6	126851160	0.000534547	247.065	54.7866	1.59956e-140	0.7779
SH	DLBCL	rs1490819	T	C	5	67099798	7.15181e-05	33.04	54.7866	7.29962e-20	0.9607
SH	DLBCL	rs150095746	G	A	8	76486799	2.89274e-05	13.3633	54.7866	1.29999e-08	0.9566
SH	DLBCL	rs1573891	C	G	15	99186488	0.00030667	141.709	54.7866	3.40017e-79	0.7567
SH	DLBCL	rs17038164	C	T	1	118862669	0.000358454	165.647	54.7866	6.4998e-95	0.7992
SH	DLBCL	rs17157112	G	T	7	28779946	0.000130774	60.4187	54.7866	5.50047e-35	0.8173
SH	DLBCL	rs17357954	T	G	1	41487337	0.000318685	147.263	54.7866	2.09991e-84	0.793201
SH	DLBCL	rs17592880	G	A	11	59286521	3.104e-05	14.3393	54.7866	2e-09	0.9028
SH	DLBCL	rs184090834	A	T	2	219873482	0.000218053	100.751	54.7866	4.00037e-52	0.9524
SH	DLBCL	rs1910252	T	C	8	49407362	7.72581e-05	35.692	54.7866	2.39994e-21	0.8664
SH	DLBCL	rs1984119	C	T	9	98368761	0.000331239	153.066	54.7866	2.29985e-84	0.706801
SH	DLBCL	rs2016437	G	T	1	235539355	4.12593e-05	19.0604	54.7866	2.49977e-12	0.9944
SH	DLBCL	rs2239748	T	C	13	33101817	9.21502e-05	42.5725	54.7866	5.90065e-25	0.858
SH	DLBCL	rs227745	A	T	17	54762165	0.000147762	68.2683	54.7866	1.59993e-39	0.993
SH	DLBCL	rs2290154	C	T	18	77211175	0.000106338	49.128	54.7866	1.80011e-28	0.9855
SH	DLBCL	rs2305141	G	A	2	233684402	8.91768e-05	41.1987	54.7866	8.9002e-25	0.8626
SH	DLBCL	rs2368274	T	G	10	28193276	2.82504e-05	13.0506	54.7866	1.29999e-08	0.9778
SH	DLBCL	rs2592831	C	T	4	1711404	0.000137804	63.6672	54.7866	2.90001e-37	0.8975
SH	DLBCL	rs2741311	C	T	2	233239743	0.000119773	55.3354	54.7866	1.50003e-32	0.9763
SH	DLBCL	rs274668	T	C	5	6711630	5.35568e-05	24.7418	54.7866	2.39994e-15	0.9874
SH	DLBCL	rs2812237	A	G	13	51299120	8.78152e-05	40.5696	54.7866	8.49963e-24	0.8396
SH	DLBCL	rs2835676	T	C	21	38591311	3.92152e-05	18.1161	54.7866	2.29985e-11	0.9846
SH	DLBCL	rs2871960	C	A	3	141121814	0.00158816	734.816	54.7866	1e-200	0.3642
SH	DLBCL	rs3020407	A	G	6	152307261	6.04509e-05	27.9269	54.7866	2.09991e-17	0.9789
SH	DLBCL	rs3020644	G	A	6	31894626	0.000258622	119.501	54.7866	2.60016e-69	0.906
SH	DLBCL	rs3116168	C	T	2	232989831	0.000312735	144.513	54.7866	7.50067e-83	0.9001
SH	DLBCL	rs3118906	A	G	13	51106788	0.000594802	274.931	54.7866	6.39735e-152	0.8544
SH	DLBCL	rs34773647	T	G	1	150130983	0.000110319	50.9674	54.7866	1e-23	0.8421
SH	DLBCL	rs351373	T	G	1	212426631	4.11264e-05	18.9991	54.7866	2.80027e-12	0.9533
SH	DLBCL	rs3795949	A	C	2	23926932	0.000189477	87.5449	54.7866	7.70016e-51	0.9691
SH	DLBCL	rs3807945	A	G	7	20415826	0.000196763	90.9123	54.7866	4.10015e-52	0.9464
SH	DLBCL	rs4287972	T	C	4	88645798	7.85985e-05	36.3113	54.7866	5.19996e-22	0.9857
SH	DLBCL	rs4291276	G	A	8	23173591	0.000134916	62.3326	54.7866	5.50047e-36	0.8175
SH	DLBCL	rs4870056	A	G	6	152162227	0.000255434	118.028	54.7866	3.19963e-68	0.8585
SH	DLBCL	rs4969471	G	C	17	79977813	0.000104945	48.4842	54.7866	2.29985e-28	0.9381
SH	DLBCL	rs4982404	T	C	14	21539684	0.000124963	57.7338	54.7866	3.59998e-33	0.9549
SH	DLBCL	rs55837722	C	G	10	94850473	4.04073e-05	18.6668	54.7866	6.59933e-12	0.8861
SH	DLBCL	rs56077950	T	C	4	122721412	0.000130347	60.2213	54.7866	3.19963e-35	0.829
SH	DLBCL	rs56128104	C	G	7	56071984	4.53362e-05	20.9439	54.7866	3.40017e-13	0.9368
SH	DLBCL	rs59735916	T	C	12	94385877	4.21189e-05	19.4576	54.7866	2.60016e-12	0.9858
SH	DLBCL	rs610798	C	G	1	32347703	0.00010055	46.4534	54.7866	8.99912e-28	0.8286
SH	DLBCL	rs61776719	A	C	1	38461319	0.000132078	61.0213	54.7866	4.49987e-36	0.8172
SH	DLBCL	rs62358929	C	G	5	37785917	5.0655e-05	23.4011	54.7866	1.59993e-14	0.9802
SH	DLBCL	rs670318	C	T	1	63727542	3.72261e-05	17.1972	54.7866	2.70023e-11	0.9882
SH	DLBCL	rs6744603	T	C	2	44476117	0.000105406	48.6972	54.7866	8.4004e-29	0.8377
SH	DLBCL	rs6761931	G	A	2	136150512	4.22061e-05	19.4979	54.7866	1.39991e-12	0.9448
SH	DLBCL	rs6828122	G	A	4	18006052	0.000829606	383.553	54.7866	1e-200	0.6829
SH	DLBCL	rs686112	C	T	17	47325717	6.80338e-05	31.4302	54.7866	5.50047e-19	0.9871
SH	DLBCL	rs703998	T	A	10	80912499	0.000163409	75.4986	54.7866	8.60003e-43	0.9968
SH	DLBCL	rs704660	T	C	11	30447998	9.67351e-05	44.6909	54.7866	2.29985e-26	0.9238
SH	DLBCL	rs7087507	G	A	10	63745689	5.14584e-05	23.7723	54.7866	1e-14	0.9357
SH	DLBCL	rs7208285	A	G	17	76746325	5.52982e-05	25.5463	54.7866	1.10002e-15	0.878
SH	DLBCL	rs7248294	C	T	19	46898234	2.75612e-05	12.7322	54.7866	2.39999e-08	0.9701
SH	DLBCL	rs7306710	C	T	12	66376091	0.00087095	402.684	54.7866	1e-200	0.9875
SH	DLBCL	rs73453871	A	G	15	89261671	4.42803e-05	20.4561	54.7866	7.8001e-13	0.9104
SH	DLBCL	rs737380	G	A	21	38077468	3.51221e-05	16.2251	54.7866	2.59998e-10	0.9536
SH	DLBCL	rs7594625	G	T	2	218293564	0.000166207	76.7919	54.7866	1.50003e-44	0.8903
SH	DLBCL	rs7621604	G	A	3	61557718	0.000171629	79.2975	54.7866	7.89951e-46	0.8797
SH	DLBCL	rs76325149	T	C	7	100389590	2.53824e-05	11.7257	54.7866	4.70002e-08	0.9808
SH	DLBCL	rs76887969	G	C	9	99224962	0.000135838	62.7588	54.7866	2.90001e-35	0.8561
SH	DLBCL	rs7689420	C	T	4	145568352	0.000997239	461.132	54.7866	1e-200	0.606599
SH	DLBCL	rs778407	T	G	1	56704424	6.65701e-05	30.7539	54.7866	5.30029e-19	0.8953
SH	DLBCL	rs78051210	C	T	6	131379491	0.000133672	61.7578	54.7866	6.29941e-36	0.832
SH	DLBCL	rs78264848	A	G	5	121191166	2.88587e-05	13.3316	54.7866	6.1e-09	0.9186
SH	DLBCL	rs7847753	C	T	9	4163904	2.82257e-05	13.0392	54.7866	1.09999e-08	0.9956
SH	DLBCL	rs78817479	A	C	9	17040371	6.29615e-05	29.0868	54.7866	1.29987e-17	0.9522
SH	DLBCL	rs7928703	G	T	11	29080664	3.64963e-05	16.86	54.7866	7.89951e-11	0.9763
SH	DLBCL	rs79747671	T	C	12	103140344	0.000123606	57.1068	54.7866	1.59993e-33	0.9133
SH	DLBCL	rs7976738	C	T	12	91495838	2.77701e-05	12.8287	54.7866	1.09999e-08	0.9871
SH	DLBCL	rs7978217	G	T	12	20630869	3.16003e-05	14.5982	54.7866	1.2e-09	0.8991
SH	DLBCL	rs798490	A	G	7	2801542	0.000713825	329.986	54.7866	2.99916e-184	0.8776
SH	DLBCL	rs8033211	G	C	15	63061887	2.9727e-05	13.7327	54.7866	4.09996e-09	0.9463
SH	DLBCL	rs876122	G	A	6	6886297	0.000134972	62.3586	54.7866	7.8001e-37	0.9051
SH	DLBCL	rs893900	T	C	15	67014528	0.000126873	58.6162	54.7866	5.19996e-34	0.8211
SH	DLBCL	rs927578	T	G	13	28075022	2.85024e-05	13.167	54.7866	9.80009e-09	0.9092
SH	DLBCL	rs9391254	T	C	6	105377347	0.000554426	256.258	54.7866	9.7051e-146	0.752199
SH	DLBCL	rs9435731	A	C	1	17306029	0.000408126	188.61	54.7866	1.30017e-107	0.9106
SH	DLBCL	rs9487084	G	T	6	109717088	0.000147245	68.0294	54.7866	5.90065e-40	0.9255
SH	DLBCL	rs9496369	T	C	6	142724918	0.000640154	295.907	54.7866	8.4918e-168	0.7154
SH	DLBCL	rs9824877	A	G	3	98896242	3.80081e-05	17.5584	54.7866	1.5e-10	0.8958
SH	DLBCL	rs9830029	A	G	3	33262129	4.76865e-05	22.0297	54.7866	7.50067e-14	0.89
SH	DLBCL	rs985344	A	G	3	67347767	6.61289e-05	30.5501	54.7866	1.9002e-18	0.9614
SH	DLBCL	rs9875575	G	A	3	88299112	2.74754e-05	12.6926	54.7866	1.5e-08	0.9316
SH	DLBCL	rs9941239	G	A	16	84987947	8.0137e-05	37.0221	54.7866	6.70039e-22	0.8664
SH	DLBCL	rs798490	A	G	7	2801542	0.000713825	329.986	54.7866	2.99916e-184	0.8776
SH	DLBCL	rs8033211	G	C	15	63061887	2.9727e-05	13.7327	54.7866	4.09996e-09	0.9463
SH	DLBCL	rs876122	G	A	6	6886297	0.000134972	62.3586	54.7866	7.8001e-37	0.9051
SH	DLBCL	rs76325149	T	C	7	100389590	2.53824e-05	11.7257	54.7866	4.70002e-08	0.9808
SH	DLBCL	rs76887969	G	C	9	99224962	0.000135838	62.7588	54.7866	2.90001e-35	0.8561
SH	DLBCL	rs7689420	C	T	4	145568352	0.000997239	461.132	54.7866	1e-200	0.606599
SH	DLBCL	rs670318	C	T	1	63727542	3.72261e-05	17.1972	54.7866	2.70023e-11	0.9882
SH	DLBCL	rs6744603	T	C	2	44476117	0.000105406	48.6972	54.7866	8.4004e-29	0.8377
SH	DLBCL	rs6761931	G	A	2	136150512	4.22061e-05	19.4979	54.7866	1.39991e-12	0.9448
SH	DLBCL	rs6828122	G	A	4	18006052	0.000829606	383.553	54.7866	1e-200	0.6829
SH	DLBCL	rs2290154	C	T	18	77211175	0.000106338	49.128	54.7866	1.80011e-28	0.9855
SH	DLBCL	rs2305141	G	A	2	233684402	8.91768e-05	41.1987	54.7866	8.9002e-25	0.8626
SH	DLBCL	rs2368274	T	G	10	28193276	2.82504e-05	13.0506	54.7866	1.29999e-08	0.9778
SH	DLBCL	rs2592831	C	T	4	1711404	0.000137804	63.6672	54.7866	2.90001e-37	0.8975
SH	DLBCL	rs2741311	C	T	2	233239743	0.000119773	55.3354	54.7866	1.50003e-32	0.9763
SH	DLBCL	rs1043413	G	C	19	41939297	0.000174469	80.6098	54.7866	5.00035e-46	0.8005
SH	DLBCL	rs10498672	G	C	6	7797840	0.000116999	54.0539	54.7866	3.29989e-32	0.852
SH	FL	rs10010325	A	C	4	106106353	0.000241211	111.454	54.4486	1.50003e-63	0.6434
SH	FL	rs10011137	G	A	4	56498199	3.89973e-05	18.0154	54.4486	1.39991e-11	0.3476
SH	FL	rs10031777	C	T	4	48498290	8.16523e-05	37.7222	54.4486	9.8992e-23	0.9671
SH	FL	rs1004982	C	T	15	51613811	7.46137e-05	34.4702	54.4486	1.20005e-20	0.2888
SH	FL	rs10059884	A	C	5	32832474	0.000358775	165.795	54.4486	9.30037e-94	0.9375
SH	FL	rs10061757	C	G	5	56086805	8.03161e-05	37.1049	54.4486	2.90001e-22	0.4123
SH	FL	rs10082476	G	A	10	124164654	0.000128562	59.3965	54.4486	1.99986e-34	0.754201
SH	FL	rs10098103	C	T	8	23397081	3.78145e-05	17.469	54.4486	3.19963e-11	0.738901
SH	FL	rs10105330	T	C	8	58136501	3.79168e-05	17.5162	54.4486	2.90001e-11	0.4403
SH	FL	rs10114341	C	T	9	96919182	3.60608e-05	16.6588	54.4486	8.69961e-11	0.7122
SH	FL	rs10114881	C	T	9	76676071	2.84823e-05	13.1577	54.4486	7.90005e-09	0.3682
SH	FL	rs10123659	G	T	9	83235735	3.8501e-05	17.7861	54.4486	1.9002e-11	0.9815
SH	FL	rs10129429	A	G	14	92430831	0.000230794	106.639	54.4486	4.10015e-60	0.1397
SH	FL	rs10131337	T	C	14	37144516	7.69208e-05	35.5361	54.4486	5.19996e-21	0.5802
SH	FL	rs1013495	T	C	10	81140253	0.000228883	105.756	54.4486	5.79963e-60	0.4965
SH	FL	rs10139746	G	A	14	75040338	0.000110494	51.0483	54.4486	9.79941e-30	0.8424
SH	FL	rs10155941	C	T	7	134422732	6.74324e-05	31.1524	54.4486	5.90065e-19	0.3572
SH	FL	rs10165255	G	A	2	10199601	0.000131878	60.929	54.4486	1.10002e-35	0.3895
SH	FL	rs10181220	T	C	2	20035567	3.41962e-05	15.7974	54.4486	1.79999e-10	0.0182398
SH	FL	rs1019075	T	C	14	73884047	3.66079e-05	16.9116	54.4486	7.19946e-11	0.5182
SH	FL	rs1020048	C	A	9	86666993	9.3664e-05	43.2719	54.4486	3.90032e-25	0.4257
SH	FL	rs10202701	T	C	2	232328681	0.000173348	80.0915	54.4486	2.19989e-46	0.8875
SH	FL	rs10207736	T	A	2	217863554	6.87504e-05	31.7613	54.4486	2.09991e-19	0.1331
SH	FL	rs10221274	T	G	17	68093498	6.53529e-05	30.1916	54.4486	6.4003e-18	0.8393
SH	FL	rs10233251	G	A	7	46211533	8.55778e-05	39.5359	54.4486	1.99986e-23	0.781801
SH	FL	rs10241336	C	T	7	19610215	0.000100645	46.4974	54.4486	1.50003e-27	0.8543
SH	FL	rs10253161	G	A	7	46996392	2.78208e-05	12.8521	54.4486	1.09999e-08	0.643899
SH	FL	rs10283100	G	A	8	120596023	0.000103487	47.8104	54.4486	4.19952e-28	0.7229
SH	FL	rs10401891	T	C	19	4962848	0.000178477	82.4617	54.4486	1e-46	0.3975
SH	FL	rs1042838	A	C	11	100933412	2.76286e-05	12.7633	54.4486	1.29999e-08	0.5916
SH	FL	rs1043413	G	C	19	41939297	0.000174469	80.6098	54.4486	5.00035e-46	0.8574
SH	FL	rs1043547	T	G	14	93406789	5.33731e-05	24.6569	54.4486	7.50067e-15	0.1289
SH	FL	rs1044299	T	C	1	176811873	0.000228985	105.803	54.4486	8.00018e-61	0.2896
SH	FL	rs10498672	G	C	6	7797840	0.000116999	54.0539	54.4486	3.29989e-32	0.6886
SH	FL	rs1050969	C	T	8	103661730	3.33357e-05	15.3999	54.4486	1.5e-09	0.737999
SH	FL	rs1051547	C	T	16	19279380	4.55917e-05	21.0619	54.4486	5.19996e-13	0.3758
SH	FL	rs1052256	G	A	1	172363488	0.000114462	52.8816	54.4486	1.69981e-31	0.3716
SH	FL	rs1056173	A	G	7	5364041	6.24483e-05	28.8497	54.4486	1.59993e-17	0.1464
SH	FL	rs1065368	C	T	16	1036860	8.10308e-05	37.435	54.4486	2.99985e-21	0.5829
SH	FL	rs1074683	G	C	20	32304653	0.000349574	161.541	54.4486	2.80027e-90	0.0843607
SH	FL	rs10748128	T	G	12	69827658	0.000300471	138.844	54.4486	9.49948e-79	0.4884
SH	FL	rs10756792	T	C	9	16726119	6.9021e-05	31.8863	54.4486	3.50026e-19	0.8499
SH	FL	rs10770705	C	A	12	20857467	0.000103437	47.7876	54.4486	2.70023e-28	0.3007
SH	FL	rs10773083	T	G	12	124791650	0.00012851	59.3726	54.4486	2.29985e-33	0.8767
SH	FL	rs10775348	G	A	16	88806348	0.000149961	69.2847	54.4486	1.39991e-39	0.6799
SH	FL	rs10789401	G	A	1	42081111	4.34994e-05	20.0953	54.4486	6.89922e-13	0.9012
SH	FL	rs10826579	A	G	10	29491536	4.9164e-05	22.7123	54.4486	1.20005e-13	0.9837
SH	FL	rs10831284	A	G	11	94667964	3.3331e-05	15.3977	54.4486	4.09996e-10	0.4253
SH	FL	rs10832961	G	C	11	18653957	8.82051e-05	40.7498	54.4486	3.69999e-24	0.4182
SH	FL	rs10840242	C	T	11	9474382	4.55068e-05	21.0227	54.4486	3.50026e-13	0.9608
SH	FL	rs10861678	A	G	12	107319661	9.46647e-05	43.7343	54.4486	5.30029e-26	0.1495
SH	FL	rs10874746	C	T	1	93323971	0.000111466	51.4971	54.4486	9.8992e-31	0.8654
SH	FL	rs10901216	A	G	9	133471891	0.000216203	99.896	54.4486	7.70016e-57	0.7819
SH	FL	rs10916606	T	C	1	224570425	9.19955e-05	42.5011	54.4486	1.69981e-25	0.5968
SH	FL	rs10922478	G	A	1	89144053	0.000177108	81.829	54.4486	7.59976e-48	0.2622
SH	FL	rs10923724	T	C	1	119546842	4.41924e-05	20.4155	54.4486	4.79954e-13	0.2413
SH	FL	rs10943915	T	A	6	83617970	4.77731e-05	22.0697	54.4486	6.29941e-14	0.566301
SH	FL	rs10945540	A	G	6	158738975	9.83339e-05	45.4296	54.4486	2.99985e-27	0.4141
SH	FL	rs10948	T	G	19	10754905	0.000136354	62.9972	54.4486	2.99985e-36	0.4104
SH	FL	rs10953083	A	C	7	92657034	5.15721e-05	23.8249	54.4486	9.09913e-15	0.8129
SH	FL	rs10980706	T	G	9	113803627	9.4469e-05	43.6439	54.4486	9.30037e-26	0.6323
SH	FL	rs10989088	A	G	9	98823407	3.91978e-05	18.108	54.4486	1.39991e-11	0.4897
SH	FL	rs10995319	C	T	10	52762887	7.07788e-05	32.6984	54.4486	1.20005e-19	0.4469
SH	FL	rs11001271	A	G	10	76822260	2.62464e-05	12.1248	54.4486	3.2e-08	0.9936
SH	FL	rs11049708	C	T	12	28697814	0.000362405	167.473	54.4486	2.19989e-94	0.0423604
SH	FL	rs11058226	C	T	12	122938958	9.9118e-05	45.7919	54.4486	3.69999e-27	0.0999402
SH	FL	rs11088114	A	C	21	30612396	3.37006e-05	15.5685	54.4486	6.49995e-10	0.536701
SH	FL	rs11122824	T	A	2	121591475	4.62226e-05	21.3534	54.4486	1.9002e-13	0.326
SH	FL	rs11129108	C	T	3	23179483	2.68283e-05	12.3936	54.4486	2.19999e-08	0.4766
SH	FL	rs11141738	T	C	9	89910210	5.5233e-05	25.5162	54.4486	8.69961e-16	0.623
SH	FL	rs11144782	G	C	9	78795213	4.03671e-05	18.6482	54.4486	7.39946e-12	0.8594
SH	FL	rs11152363	A	G	18	53057188	4.03959e-05	18.6616	54.4486	1.29987e-11	0.8412
SH	FL	rs11167487	C	T	5	149301335	4.00836e-05	18.5173	54.4486	6.4998e-12	0.7228
SH	FL	rs111738917	A	G	4	106240476	4.23278e-05	19.5541	54.4486	1.69981e-12	0.1792
SH	FL	rs11196169	G	A	10	114721237	3.07313e-05	14.1967	54.4486	4.39997e-09	0.4241
SH	FL	rs11198898	C	A	10	121118492	0.000148715	68.7087	54.4486	2.09991e-39	0.4425
SH	FL	rs11205303	C	T	1	149906413	0.000569646	263.297	54.4486	5.00035e-149	0.9633
SH	FL	rs11209173	A	G	1	68369950	2.74501e-05	12.6808	54.4486	1.29999e-08	0.3498
SH	FL	rs112153300	A	G	21	47547474	9.44127e-05	43.6179	54.4486	2.29985e-25	0.8433
SH	FL	rs11217863	A	G	11	120293138	0.000101702	46.9858	54.4486	1.29987e-27	0.2936
SH	FL	rs11221158	T	C	11	127980209	5.08295e-05	23.4818	54.4486	1.39991e-14	0.6507
SH	FL	rs11245333	A	C	10	126383088	0.000114953	53.1082	54.4486	7.10068e-31	0.9934
SH	FL	rs112471207	T	C	2	172415930	9.33008e-05	43.1041	54.4486	6.4998e-26	0.8938
SH	FL	rs11252860	C	A	10	5024356	7.40567e-05	34.2129	54.4486	1.9002e-19	0.0894891
SH	FL	rs11259936	C	A	15	84580582	0.000638447	295.118	54.4486	1e-164	0.2808
SH	FL	rs112635811	T	C	11	1930713	3.12801e-05	14.4502	54.4486	5.69994e-09	0.3857
SH	FL	rs113595815	G	T	15	86071450	3.97559e-05	18.3659	54.4486	8.4004e-12	0.0821505
SH	FL	rs113851505	T	C	16	341988	2.58476e-05	11.9405	54.4486	4.70002e-08	0.9117
SH	FL	rs11466399	A	G	1	218591623	0.000311263	143.832	54.4486	3.29989e-82	0.354
SH	FL	rs114784809	A	G	5	127674221	4.86468e-05	22.4734	54.4486	7.00003e-14	0.680899
SH	FL	rs11553764	T	C	12	104415244	4.38432e-05	20.2541	54.4486	8.00018e-13	0.4567
SH	FL	rs11671106	T	C	19	46367025	3.15134e-05	14.558	54.4486	1.5e-09	0.0301801
SH	FL	rs11681299	T	C	2	88901732	0.000206446	95.387	54.4486	2.09991e-55	0.1679
SH	FL	rs116893322	A	G	15	85524628	6.75823e-05	31.2216	54.4486	5.30029e-19	0.4715
SH	FL	rs11690176	A	G	2	242356887	5.37686e-05	24.8396	54.4486	1.29987e-15	0.4662
SH	FL	rs1169738	A	G	12	121584410	2.88856e-05	13.344	54.4486	6.1e-09	0.4227
SH	FL	rs11708067	G	A	3	123065778	6.66154e-05	30.7749	54.4486	7.29962e-19	0.5243
SH	FL	rs11708810	A	T	3	55500045	7.74795e-05	35.7943	54.4486	2.39994e-21	0.6953
SH	FL	rs11710894	T	C	3	112991959	4.12983e-05	19.0785	54.4486	3.29989e-12	0.0793798
SH	FL	rs11711770	G	A	3	43066768	5.76324e-05	26.6247	54.4486	1.80011e-16	0.5302
SH	FL	rs11713042	C	T	3	41288004	7.64524e-05	35.3197	54.4486	2.39994e-21	0.8042
SH	FL	rs1171614	C	T	10	61469538	0.000124017	57.2964	54.4486	3.19963e-33	0.6109
SH	FL	rs11720869	A	G	3	185619716	3.98038e-05	18.388	54.4486	9.3994e-12	0.4515
SH	FL	rs11722554	A	G	4	5016883	7.4343e-05	34.3452	54.4486	8.10028e-21	0.718899
SH	FL	rs11741562	G	T	5	79893662	2.71937e-05	12.5624	54.4486	2.19999e-08	0.6915
SH	FL	rs11743919	T	C	5	156754251	4.30274e-05	19.8773	54.4486	1e-12	0.0622702
SH	FL	rs11746047	T	C	5	123997308	6.21229e-05	28.6993	54.4486	1.59993e-17	0.2655
SH	FL	rs11747997	C	A	5	142790752	5.83765e-05	26.9685	54.4486	1.59993e-16	0.6144
SH	FL	rs11774206	C	T	8	144375815	8.4715e-05	39.1373	54.4486	2.39994e-23	0.582101
SH	FL	rs11775903	G	A	8	25321076	4.04994e-05	18.7094	54.4486	5.70033e-12	0.5753
SH	FL	rs117793215	T	C	15	100535681	5.2745e-05	24.3667	54.4486	6.29941e-14	0.9161
SH	FL	rs1178172	C	T	7	18794541	7.83021e-05	36.1743	54.4486	8.9002e-22	0.511601
SH	FL	rs117829095	A	C	7	1932374	3.4361e-05	15.8735	54.4486	4.49997e-10	0.1851
SH	FL	rs11783598	C	T	8	4798388	3.25704e-05	15.0463	54.4486	7.79992e-10	0.8871
SH	FL	rs1179947	A	G	12	122442444	3.22308e-05	14.8894	54.4486	7.79992e-10	0.5307
SH	FL	rs118173451	C	T	22	28356600	9.45214e-05	43.6681	54.4486	9.09913e-25	0.6046
SH	FL	rs11877685	A	G	18	41880210	3.48025e-05	16.0775	54.4486	3.40001e-10	0.2679
SH	FL	rs11898716	G	A	2	241828311	4.84804e-05	22.3965	54.4486	4.79954e-14	0.6883
SH	FL	rs11947952	G	C	4	144252964	3.36383e-05	15.5396	54.4486	3.2e-10	0.3426
SH	FL	rs11955153	C	T	5	170864548	0.000194322	89.7839	54.4486	1.69981e-51	0.9004
SH	FL	rs11957435	C	T	5	122657858	4.87125e-05	22.5037	54.4486	6.4003e-14	0.2328
SH	FL	rs11998884	T	C	9	33684436	4.10401e-05	18.9591	54.4486	7.50067e-12	0.2642
SH	FL	rs12051048	A	C	16	783864	0.000251259	116.098	54.4486	2.39994e-65	0.1489
SH	FL	rs12055151	A	T	5	50418925	3.7367e-05	17.2622	54.4486	3.90032e-11	0.4407
SH	FL	rs12126112	T	C	1	85730595	2.72708e-05	12.598	54.4486	1.2e-08	0.9752
SH	FL	rs12130046	A	G	1	67444043	7.16418e-05	33.0972	54.4486	4.00037e-20	0.9086
SH	FL	rs12130750	C	T	1	200208417	3.8099e-05	17.6004	54.4486	1.99986e-11	0.0958495
SH	FL	rs12132534	G	C	1	147098986	2.8433e-05	13.135	54.4486	6.19998e-09	0.455
SH	FL	rs12148447	T	C	15	38366667	3.78903e-05	17.504	54.4486	9.79941e-11	0.693
SH	FL	rs12185993	A	T	3	188565410	3.65561e-05	16.8877	54.4486	6.29941e-11	0.1081
SH	FL	rs12209223	A	C	6	76164589	0.000178751	82.5886	54.4486	9.09913e-48	0.579399
SH	FL	rs12342779	G	T	9	119122437	0.000307097	141.907	54.4486	5.10035e-80	0.435
SH	FL	rs12348423	C	A	9	4740251	6.47894e-05	29.9313	54.4486	2.90001e-18	0.6593
SH	FL	rs12362444	A	G	11	45278317	3.61031e-05	16.6783	54.4486	9.09913e-11	0.757201
SH	FL	rs12406530	G	A	1	113117213	8.89208e-05	41.0804	54.4486	1.10002e-24	0.8203
SH	FL	rs12452505	G	C	17	63556402	0.00021691	100.223	54.4486	9.8992e-57	0.02274
SH	FL	rs12452590	G	T	17	60720058	7.70853e-05	35.6121	54.4486	6.20012e-21	0.0438097
SH	FL	rs12459155	G	C	19	4774475	4.16171e-05	19.2258	54.4486	4.10015e-12	0.9697
SH	FL	rs12466227	G	A	2	60148940	5.19067e-05	23.9795	54.4486	4.60045e-15	0.702301
SH	FL	rs12478285	A	G	2	109051753	3.14026e-05	14.5068	54.4486	1e-09	0.8817
SH	FL	rs12483653	T	C	21	17355049	5.73767e-05	26.5066	54.4486	8.99912e-16	0.4344
SH	FL	rs12497944	A	G	3	24044111	4.55627e-05	21.0485	54.4486	2.70023e-13	0.617999
SH	FL	rs12517974	C	A	5	137744369	2.89375e-05	13.368	54.4486	5.1e-09	0.640301
SH	FL	rs12552167	T	C	9	139322927	0.000125666	58.0585	54.4486	6.20012e-34	0.1108
SH	FL	rs12584892	T	C	13	73624534	5.00836e-05	23.1372	54.4486	3.29989e-14	0.649901
SH	FL	rs12592845	T	C	15	48684958	0.000103614	47.8694	54.4486	3.29989e-28	0.9508
SH	FL	rs12622270	C	T	2	164449314	3.01871e-05	13.9453	54.4486	2.19999e-09	0.5114
SH	FL	rs12645070	A	G	4	57770106	0.000176114	81.3698	54.4486	4.90004e-47	0.6276
SH	FL	rs12648093	G	A	4	123838758	7.02468e-05	32.4527	54.4486	9.79941e-20	0.967
SH	FL	rs12668269	T	A	7	65779510	4.00043e-05	18.4806	54.4486	7.39946e-12	0.03679
SH	FL	rs12669267	T	C	7	73304636	7.17246e-05	33.1354	54.4486	1.29987e-19	0.001685
SH	FL	rs12868316	T	C	13	113878523	3.02417e-05	13.9705	54.4486	3.2e-09	0.668599
SH	FL	rs12903939	A	G	15	101641034	5.48325e-05	25.3311	54.4486	1.69981e-12	0.7573
SH	FL	rs1291066	C	G	20	35790918	7.67593e-05	35.4615	54.4486	3.50026e-21	0.525
SH	FL	rs12924101	C	A	16	89862906	5.42878e-05	25.0795	54.4486	1.9002e-15	0.0682103
SH	FL	rs12952981	A	G	17	79409189	6.90859e-05	31.9163	54.4486	2.99985e-19	0.1956
SH	FL	rs12966785	A	G	18	22858941	6.36441e-05	29.4021	54.4486	9.70063e-18	0.5413
SH	FL	rs12968652	A	G	18	46501070	9.65596e-05	44.6098	54.4486	1.50003e-25	0.3313
SH	FL	rs12982509	C	T	19	3412057	0.000113795	52.5734	54.4486	1.9002e-30	0.3588
SH	FL	rs12985850	A	G	19	2155042	0.000301687	139.406	54.4486	2.29985e-77	0.2454
SH	FL	rs13014796	A	G	2	200321050	8.19835e-05	37.8752	54.4486	8.60003e-23	0.4849
SH	FL	rs13168903	G	T	5	158517233	3.11366e-05	14.3839	54.4486	1.5e-09	0.4032
SH	FL	rs1317867	G	A	17	21276114	0.000172068	79.5003	54.4486	6.59933e-45	0.4222
SH	FL	rs13178887	C	T	5	88355993	0.000189927	87.7532	54.4486	1.29987e-50	0.4318
SH	FL	rs13179048	A	C	5	95542726	6.33668e-05	29.274	54.4486	5.50047e-18	0.728201
SH	FL	rs13226864	A	G	7	100499315	4.05989e-05	18.7553	54.4486	4.60045e-12	0.9812
SH	FL	rs13251736	C	T	8	32291790	3.25208e-05	15.0234	54.4486	9.09997e-10	0.2251
SH	FL	rs13334364	C	T	16	67332365	8.9766e-05	41.471	54.4486	1.9002e-24	0.1011
SH	FL	rs13340461	T	C	6	41924278	0.000128535	59.3841	54.4486	5.19996e-35	0.8914
SH	FL	rs13406427	G	C	2	46878351	5.25648e-05	24.2835	54.4486	2.60016e-15	0.4463
SH	FL	rs13412980	A	C	2	1545231	2.82358e-05	13.0438	54.4486	7.00003e-09	0.4264
SH	FL	rs1352982	G	A	10	25332461	4.7285e-05	21.8443	54.4486	1.10002e-13	0.8399
SH	FL	rs1353778	T	A	3	134088443	3.44183e-05	15.9	54.4486	2e-10	0.2105
SH	FL	rs136029	A	G	22	46236425	6.95619e-05	32.1362	54.4486	4.00037e-19	0.6565
SH	FL	rs138198562	C	T	12	46429309	4.35046e-05	20.0977	54.4486	2.90001e-12	0.934
SH	FL	rs138548025	C	T	4	135114664	3.23517e-05	14.9453	54.4486	4.60002e-09	0.4444
SH	FL	rs138937927	T	C	16	51095561	0.000100833	46.5843	54.4486	1.69981e-25	0.4737
SH	FL	rs1393421	A	G	15	38369210	3.00804e-05	13.896	54.4486	3.2e-09	0.2536
SH	FL	rs1395602	C	A	16	4911239	4.83588e-05	22.3403	54.4486	7.89951e-14	0.4575
SH	FL	rs140182288	T	C	1	2226159	2.86214e-05	13.222	54.4486	2.39999e-08	0.1629
SH	FL	rs140753094	A	C	1	40641118	4.86112e-05	22.4569	54.4486	3.40017e-14	0.6357
SH	FL	rs1415701	A	G	6	130345835	0.0003878	179.213	54.4486	5.60015e-100	0.544201
SH	FL	rs142190120	T	C	2	219953832	5.44346e-05	25.1473	54.4486	2.70023e-15	0.262
SH	FL	rs143384	G	A	20	34025756	0.00169548	784.554	54.4486	1e-200	0.6296
SH	FL	rs143840904	T	C	11	2813322	0.000414488	191.551	54.4486	1.20005e-100	0.0176401
SH	FL	rs144351518	G	A	4	1893651	8.38102e-05	38.7192	54.4486	1.20005e-21	0.876
SH	FL	rs1443536	G	A	4	82174165	0.000431828	199.568	54.4486	2.30144e-112	0.522001
SH	FL	rs1443749	T	C	7	121960438	6.47301e-05	29.9039	54.4486	2.49977e-18	0.0858401
SH	FL	rs145873050	T	G	1	150766213	3.43678e-05	15.8767	54.4486	2.59998e-10	0.1703
SH	FL	rs146381464	A	C	3	51463177	0.000286266	132.278	54.4486	4.10015e-74	0.7901
SH	FL	rs1468177	C	T	22	30544559	5.30518e-05	24.5085	54.4486	5.70033e-15	0.8675
SH	FL	rs146851424	C	A	13	50377910	0.000376234	173.866	54.4486	3.69999e-95	0.6169
SH	FL	rs147110934	T	G	19	55993436	0.00020845	96.3133	54.4486	1.29987e-54	0.7706
SH	FL	rs147176253	A	G	16	3946485	4.0288e-05	18.6117	54.4486	1.99986e-11	0.937
SH	FL	rs1472565	C	T	1	19755030	0.000112388	51.9234	54.4486	7.19946e-31	0.723401
SH	FL	rs1474647	T	C	1	22441865	8.7885e-05	40.6019	54.4486	1.59993e-24	0.3764
SH	FL	rs147472851	A	G	14	36245495	6.34711e-05	29.3222	54.4486	1.99986e-17	0.1168
SH	FL	rs1490384	T	C	6	126851160	0.000534547	247.065	54.4486	1.59956e-140	0.2578
SH	FL	rs1490819	T	C	5	67099798	7.15181e-05	33.04	54.4486	7.29962e-20	0.947
SH	FL	rs149290349	A	G	2	43451957	2.77593e-05	12.8237	54.4486	1.29999e-08	0.9686
SH	FL	rs149840699	A	G	20	49210579	5.26554e-05	24.3254	54.4486	1.29987e-14	0.2233
SH	FL	rs150095746	G	A	8	76486799	2.89274e-05	13.3633	54.4486	1.29999e-08	0.3362
SH	FL	rs151123887	A	G	20	34593288	7.27455e-05	33.6071	54.4486	1.39991e-18	0.5154
SH	FL	rs1512104	A	G	4	26021310	2.6428e-05	12.2087	54.4486	2.5e-08	0.2963
SH	FL	rs151305167	T	C	2	5832142	3.58279e-05	16.5512	54.4486	6.89922e-11	0.8234
SH	FL	rs1513572	C	T	4	21850305	2.61366e-05	12.0741	54.4486	2.90001e-08	0.4963
SH	FL	rs1514134	C	T	1	56116513	3.97155e-05	18.3472	54.4486	6.89922e-12	0.1659
SH	FL	rs1524065	A	C	7	38126589	0.000118177	54.5981	54.4486	4.49987e-32	0.2235
SH	FL	rs1531851	C	T	2	20694122	2.65398e-05	12.2603	54.4486	2e-08	0.1748
SH	FL	rs1545552	G	A	2	33360338	0.000231932	107.165	54.4486	2.39994e-61	0.8314
SH	FL	rs1563387	T	G	8	121179924	3.25708e-05	15.0465	54.4486	1.09999e-09	0.8796
SH	FL	rs1569364	T	C	8	116629732	6.35761e-05	29.3707	54.4486	1e-17	0.2441
SH	FL	rs1574220	C	T	5	314518	7.22017e-05	33.3558	54.4486	7.39946e-20	0.67
SH	FL	rs1593071	C	A	5	42786309	0.000163823	75.6901	54.4486	8.9002e-44	0.2936
SH	FL	rs1599473	T	G	8	120475358	0.000147216	68.0163	54.4486	4.60045e-39	0.7341
SH	FL	rs1624841	T	C	18	7556208	3.26916e-05	15.1023	54.4486	8.30004e-10	0.1467
SH	FL	rs1679910	A	G	1	53582321	3.99239e-05	18.4435	54.4486	8.19974e-12	0.9162
SH	FL	rs16824590	A	G	2	203137347	5.04299e-05	23.2972	54.4486	9.09913e-15	0.8717
SH	FL	rs16928433	A	G	12	1546814	3.68131e-05	17.0064	54.4486	5.10035e-11	0.7051
SH	FL	rs16942323	C	T	15	89383764	0.000448943	207.482	54.4486	4.69894e-116	0.9349
SH	FL	rs17034560	A	G	1	10229158	2.83998e-05	13.1196	54.4486	6.29999e-09	0.7191
SH	FL	rs17038164	C	T	1	118862669	0.000358454	165.647	54.4486	6.4998e-95	0.3493
SH	FL	rs17038954	T	C	2	1645673	4.6808e-05	21.6239	54.4486	1.20005e-13	0.610401
SH	FL	rs17148514	T	C	11	85526399	6.73915e-05	31.1334	54.4486	1.10002e-18	0.992
SH	FL	rs17157112	G	T	7	28779946	0.000130774	60.4187	54.4486	5.50047e-35	0.0204602
SH	FL	rs17197114	C	T	14	21894526	7.30481e-05	33.7469	54.4486	5.90065e-20	0.1358
SH	FL	rs17236066	A	G	2	174863486	4.49931e-05	20.7854	54.4486	2.90001e-13	0.0392302
SH	FL	rs1729090	T	C	8	13107258	4.55561e-05	21.0455	54.4486	4.10015e-13	0.3003
SH	FL	rs1730040	G	A	3	158030962	0.000117555	54.3109	54.4486	5.10035e-32	0.0846292
SH	FL	rs17357954	T	G	1	41487337	0.000318685	147.263	54.4486	2.09991e-84	0.00295298
SH	FL	rs17400325	C	T	2	178565913	0.000128947	59.5747	54.4486	3.29989e-35	0.9998
SH	FL	rs17409588	C	T	5	31528627	4.47295e-05	20.6636	54.4486	3.90032e-13	0.549301
SH	FL	rs1741344	T	C	20	4101800	0.000187244	86.5131	54.4486	2.39994e-49	0.1803
SH	FL	rs174529	C	T	11	61543961	4.06316e-05	18.7705	54.4486	6.09958e-12	0.4672
SH	FL	rs17472816	G	A	10	12020794	5.98589e-05	27.6533	54.4486	1.80011e-16	0.3231
SH	FL	rs17592880	G	A	11	59286521	3.104e-05	14.3393	54.4486	2e-09	0.729001
SH	FL	rs17599450	T	C	19	30328753	3.61115e-05	16.6822	54.4486	1.29999e-10	0.9252
SH	FL	rs17741562	C	T	2	148563066	2.93629e-05	13.5645	54.4486	3.69999e-09	0.5423
SH	FL	rs17800727	G	A	16	53481010	0.000182432	84.2896	54.4486	5.10035e-48	0.9346
SH	FL	rs1863758	G	A	15	56151030	2.79118e-05	12.8941	54.4486	1.09999e-08	0.7799
SH	FL	rs1884897	G	A	20	6612832	0.000557622	257.736	54.4486	4.60257e-142	0.9449
SH	FL	rs188571030	T	C	15	75786845	4.38652e-05	20.2643	54.4486	2.29985e-11	0.2438
SH	FL	rs1889643	A	C	6	141721197	3.56807e-05	16.4832	54.4486	7.8001e-11	0.1544
SH	FL	rs1910252	T	C	8	49407362	7.72581e-05	35.692	54.4486	2.39994e-21	0.762901
SH	FL	rs1948047	C	T	6	47585912	5.21825e-05	24.1069	54.4486	3.10027e-15	0.3536
SH	FL	rs1952256	G	A	1	184035116	0.00048495	224.131	54.4486	3.1989e-127	0.8599
SH	FL	rs1961247	T	C	11	32949014	3.1498e-05	14.5509	54.4486	1.29999e-09	0.145
SH	FL	rs1962482	T	G	1	86313536	4.20874e-05	19.443	54.4486	1.69981e-12	0.0874198
SH	FL	rs1984119	C	T	9	98368761	0.000331239	153.066	54.4486	2.29985e-84	0.0005424
SH	FL	rs1985278	T	G	1	21091861	0.000111029	51.2954	54.4486	5.40008e-30	0.2346
SH	FL	rs1985299	G	A	3	183538416	3.89728e-05	18.0041	54.4486	1.9002e-11	0.173
SH	FL	rs1996711	C	T	3	146980646	7.30924e-05	33.7674	54.4486	1.59993e-20	0.04246
SH	FL	rs2016437	G	T	1	235539355	4.12593e-05	19.0604	54.4486	2.49977e-12	0.1734
SH	FL	rs2034395	T	G	2	121610186	0.000153462	70.9021	54.4486	2.49977e-41	0.0770105
SH	FL	rs2035901	G	A	4	145521867	0.000286122	132.211	54.4486	7.00003e-75	0.7637
SH	FL	rs2065036	T	C	22	28099361	4.01953e-05	18.5689	54.4486	1.20005e-11	0.2633
SH	FL	rs2072346	T	C	16	4027423	7.60417e-05	35.13	54.4486	4.49987e-21	0.286
SH	FL	rs2093210	T	C	14	60957279	0.000400267	184.976	54.4486	5.19996e-103	0.577801
SH	FL	rs2099333	T	C	19	19605963	0.000114884	53.0764	54.4486	9.30037e-31	0.4547
SH	FL	rs2110748	A	C	2	202345476	4.23352e-05	19.5575	54.4486	1.39991e-12	0.772601
SH	FL	rs2131371	C	A	12	46796522	9.37175e-05	43.2967	54.4486	8.80035e-26	0.8602
SH	FL	rs215226	G	A	12	591300	0.000171754	79.3549	54.4486	1.80011e-45	0.2333
SH	FL	rs2157323	C	T	6	116729779	8.43294e-05	38.9591	54.4486	1.29987e-23	0.9474
SH	FL	rs2181834	T	G	10	102661251	0.000123833	57.2117	54.4486	3.10027e-33	0.656299
SH	FL	rs2194411	A	G	3	185548663	0.000421597	194.838	54.4486	1.39959e-107	0.772499
SH	FL	rs2219320	C	T	1	26803430	0.000124613	57.5721	54.4486	3.69999e-34	0.702499
SH	FL	rs2229094	C	T	6	31540556	0.000220897	102.065	54.4486	3.90032e-59	0.6101
SH	FL	rs2239748	T	C	13	33101817	9.21502e-05	42.5725	54.4486	5.90065e-25	0.477
SH	FL	rs2240169	T	C	19	1018830	3.34631e-05	15.4587	54.4486	4.49997e-10	0.0559101
SH	FL	rs228279	C	T	17	36918350	9.01801e-05	41.6623	54.4486	1.29987e-24	0.1399
SH	FL	rs2290154	C	T	18	77211175	0.000106338	49.128	54.4486	1.80011e-28	0.8399
SH	FL	rs2302580	T	C	4	8608634	0.000144624	66.8183	54.4486	1.50003e-38	0.5105
SH	FL	rs2303597	C	T	2	71780821	7.37642e-05	34.0777	54.4486	1.29987e-20	0.6051
SH	FL	rs2305141	G	A	2	233684402	8.91768e-05	41.1987	54.4486	8.9002e-25	0.7647
SH	FL	rs2326181	T	C	20	3312596	3.68901e-05	17.042	54.4486	5.50047e-11	0.4453
SH	FL	rs235763	C	T	20	6705246	0.000122276	56.4919	54.4486	1.50003e-32	0.5962
SH	FL	rs2368274	T	G	10	28193276	2.82504e-05	13.0506	54.4486	1.29999e-08	0.02334
SH	FL	rs2378788	G	A	1	183918161	2.91671e-05	13.4741	54.4486	4.79999e-09	0.0834104
SH	FL	rs2380893	G	A	2	141585138	2.73246e-05	12.6229	54.4486	1.2e-08	0.5251
SH	FL	rs2413141	G	A	22	33051198	0.000105352	48.6724	54.4486	6.09958e-28	0.4014
SH	FL	rs2427312	T	C	20	60970591	4.05955e-05	18.7538	54.4486	6.70039e-12	0.2688
SH	FL	rs244711	T	C	5	176509193	0.000657945	304.136	54.4486	3.59749e-148	0.1588
SH	FL	rs246185	C	T	16	14395432	0.00014283	65.9896	54.4486	2.70023e-37	0.9376
SH	FL	rs2475314	A	G	10	121644781	5.64662e-05	26.0859	54.4486	4.49987e-16	0.02246
SH	FL	rs2503716	T	C	1	2149292	6.66285e-05	30.781	54.4486	9.20026e-19	0.4952
SH	FL	rs2513299	T	C	11	68410157	0.000127681	58.9895	54.4486	1e-33	0.8101
SH	FL	rs2527166	T	C	8	5532881	2.82611e-05	13.0555	54.4486	1.2e-08	0.3052
SH	FL	rs2545101	T	C	5	180646014	4.02626e-05	18.6	54.4486	6.29941e-12	0.6612
SH	FL	rs2570515	T	C	2	47297082	3.31197e-05	15.3001	54.4486	4.70002e-10	0.0632193
SH	FL	rs2592831	C	T	4	1711404	0.000137804	63.6672	54.4486	2.90001e-37	0.4407
SH	FL	rs2595508	G	A	2	232253390	5.91164e-05	27.3103	54.4486	8.00018e-17	0.8765
SH	FL	rs2610986	T	C	4	18037231	0.000197232	91.1287	54.4486	8.9002e-50	0.324
SH	FL	rs2613946	G	A	3	112825573	5.79115e-05	26.7536	54.4486	2.19989e-16	0.6964
SH	FL	rs261532	T	G	5	138949362	9.23367e-05	42.6587	54.4486	1.9002e-25	0.1457
SH	FL	rs264766	C	T	5	64388979	7.50696e-05	34.6808	54.4486	5.30029e-21	0.4991
SH	FL	rs2654969	G	A	15	99532777	6.84645e-05	31.6292	54.4486	3.69999e-19	0.1364
SH	FL	rs2675228	T	C	3	13553380	0.000129726	59.9345	54.4486	6.70039e-35	0.0572506
SH	FL	rs2697546	G	A	5	90321288	3.5872e-05	16.5716	54.4486	8.10028e-11	0.743901
SH	FL	rs2715094	A	G	7	50730452	5.25006e-05	24.2538	54.4486	4.30031e-15	0.0781106
SH	FL	rs2715553	A	G	17	38496320	0.000105463	48.7233	54.4486	1.50003e-28	0.0951305
SH	FL	rs2724616	G	A	12	11870768	0.000197927	91.4502	54.4486	2.19989e-52	0.4607
SH	FL	rs2732744	C	T	7	84842884	3.32646e-05	15.367	54.4486	4.49997e-10	0.2574
SH	FL	rs273974	T	C	7	137614713	7.93559e-05	36.6612	54.4486	4.79954e-22	0.4238
SH	FL	rs2741311	C	T	2	233239743	0.000119773	55.3354	54.4486	1.50003e-32	0.3115
SH	FL	rs2746026	T	C	17	18134354	6.78314e-05	31.3367	54.4486	5.79963e-19	0.4405
SH	FL	rs274668	T	C	5	6711630	5.35568e-05	24.7418	54.4486	2.39994e-15	0.4592
SH	FL	rs2755237	C	A	13	41109429	5.10503e-05	23.5838	54.4486	1.39991e-14	0.4911
SH	FL	rs2780226	T	C	6	34199092	0.000639722	295.708	54.4486	5.29663e-168	0.450199
SH	FL	rs2789514	A	G	9	129833029	6.80112e-05	31.4198	54.4486	8.4004e-19	0.9653
SH	FL	rs2808290	T	C	10	27900882	0.000102208	47.2196	54.4486	1.39991e-27	0.8792
SH	FL	rs2812237	A	G	13	51299120	8.78152e-05	40.5696	54.4486	8.49963e-24	0.4533
SH	FL	rs2835676	T	C	21	38591311	3.92152e-05	18.1161	54.4486	2.29985e-11	0.1875
SH	FL	rs28481863	A	G	12	123902361	0.000226009	104.428	54.4486	1.69981e-59	0.4898
SH	FL	rs285187	A	G	20	42316582	4.37006e-05	20.1883	54.4486	1.10002e-12	0.8264
SH	FL	rs28519617	G	T	3	135874930	0.000214941	99.313	54.4486	1.80011e-56	0.619599
SH	FL	rs28576486	A	G	19	7213287	7.06997e-05	32.6619	54.4486	2.60016e-19	0.8251
SH	FL	rs28682325	C	T	2	54700447	5.09296e-05	23.528	54.4486	9.79941e-15	0.4262
SH	FL	rs28701981	C	T	9	98217581	0.000415071	191.821	54.4486	7.19449e-107	0.5215
SH	FL	rs28757157	T	C	15	51545401	0.000130371	60.2327	54.4486	9.60064e-35	0.8131
SH	FL	rs28929474	T	C	14	94844947	0.000398883	184.337	54.4486	1.49968e-102	0.3598
SH	FL	rs2925155	T	C	8	75886297	0.000132637	61.2796	54.4486	5.70033e-35	0.3731
SH	FL	rs3020407	A	G	6	152307261	6.04509e-05	27.9269	54.4486	2.09991e-17	0.0958606
SH	FL	rs3020644	G	A	6	31894626	0.000258622	119.501	54.4486	2.60016e-69	0.649299
SH	FL	rs310796	T	G	12	77453226	9.83577e-05	45.4406	54.4486	7.8001e-27	0.658999
SH	FL	rs3116168	C	T	2	232989831	0.000312735	144.513	54.4486	7.50067e-83	0.681299
SH	FL	rs3118906	A	G	13	51106788	0.000594802	274.931	54.4486	6.39735e-152	0.9938
SH	FL	rs332194	C	T	10	28922228	8.98245e-05	41.498	54.4486	1.69981e-24	0.772601
SH	FL	rs34074573	G	A	14	23789955	0.000136051	62.8568	54.4486	2.60016e-36	0.4023
SH	FL	rs34118426	G	A	12	94201279	0.000188098	86.908	54.4486	5.90065e-50	0.1087
SH	FL	rs34454426	A	G	3	87346735	3.79527e-05	17.5329	54.4486	1.99986e-11	0.4717
SH	FL	rs34544557	T	C	11	69911825	6.96341e-05	32.1696	54.4486	2.70023e-19	0.564
SH	FL	rs34751492	C	T	2	227268646	2.62286e-05	12.1166	54.4486	2.80001e-08	0.0670502
SH	FL	rs34773647	T	G	1	150130983	0.000110319	50.9674	54.4486	1e-23	0.9838
SH	FL	rs34776209	T	C	7	23513093	0.000273431	126.346	54.4486	1.50003e-71	0.1034
SH	FL	rs34831515	T	C	19	17275777	0.00012094	55.8746	54.4486	2.90001e-32	0.4161
SH	FL	rs34849253	A	G	18	33024107	6.83679e-05	31.5846	54.4486	1.69981e-18	0.3272
SH	FL	rs34958982	C	T	11	47547046	0.000199368	92.1162	54.4486	8.60003e-53	0.2801
SH	FL	rs35130225	A	G	5	112116069	6.52141e-05	30.1275	54.4486	1.9002e-18	0.5689
SH	FL	rs351373	T	G	1	212426631	4.11264e-05	18.9991	54.4486	2.80027e-12	0.7012
SH	FL	rs35307904	A	G	9	78511889	0.000344558	159.223	54.4486	1e-88	0.3781
SH	FL	rs35348430	G	A	10	96100627	3.16545e-05	14.6232	54.4486	1.40001e-09	0.4648
SH	FL	rs35628589	T	C	20	61440005	0.000148011	68.3834	54.4486	3.90032e-36	0.8813
SH	FL	rs35665085	A	G	22	17625915	3.37413e-05	15.5873	54.4486	4.49997e-10	0.8754
SH	FL	rs35756741	T	C	12	12868701	0.000111568	51.5445	54.4486	4.60045e-30	0.555699
SH	FL	rs35874463	G	A	15	67457698	0.000337269	155.853	54.4486	3.69999e-88	0.5636
SH	FL	rs35917062	A	G	2	191660828	5.72691e-05	26.4568	54.4486	1.50003e-16	0.1124
SH	FL	rs35954730	A	G	10	12943111	0.000193869	89.5749	54.4486	8.69961e-51	0.565999
SH	FL	rs36226649	C	T	14	24835500	0.000172176	79.55	54.4486	2.49977e-45	0.6774
SH	FL	rs3751877	C	T	16	15154898	3.60101e-05	16.6354	54.4486	9.8992e-11	0.0688605
SH	FL	rs3751921	G	A	17	25642315	3.49853e-05	16.1619	54.4486	1.6e-10	0.432
SH	FL	rs3756668	A	G	5	67596088	8.20508e-05	37.9063	54.4486	8.30042e-23	0.609799
SH	FL	rs3795949	A	C	2	23926932	0.000189477	87.5449	54.4486	7.70016e-51	0.739701
SH	FL	rs37978	G	A	7	8017851	0.00011638	53.7677	54.4486	2.29985e-31	0.5262
SH	FL	rs3807945	A	G	7	20415826	0.000196763	90.9123	54.4486	4.10015e-52	0.392
SH	FL	rs3821156	G	A	2	36741530	8.52304e-05	39.3754	54.4486	1.69981e-23	0.856
SH	FL	rs3925	A	G	8	38281658	3.44065e-05	15.8946	54.4486	2.39999e-10	0.7142
SH	FL	rs41271299	T	C	6	19839415	0.000766304	354.264	54.4486	1.1995e-200	0.3005
SH	FL	rs42039	T	C	7	92244422	0.000754959	349.015	54.4486	2.09894e-194	0.0185601
SH	FL	rs4252548	T	C	19	55879672	0.000193165	89.2494	54.4486	7.59976e-51	0.0847598
SH	FL	rs4287972	T	C	4	88645798	7.85985e-05	36.3113	54.4486	5.19996e-22	0.0340001
SH	FL	rs4291276	G	A	8	23173591	0.000134916	62.3326	54.4486	5.50047e-36	0.2533
SH	FL	rs4293126	A	G	11	122804133	7.96979e-05	36.8192	54.4486	9.3994e-22	0.5857
SH	FL	rs4339935	T	G	10	4986044	3.35376e-05	15.4931	54.4486	4.09996e-10	0.9427
SH	FL	rs4361209	G	A	22	39281636	6.71157e-05	31.0061	54.4486	1.59993e-18	0.7815
SH	FL	rs437853	C	T	2	196973	5.22391e-05	24.133	54.4486	3.59998e-15	0.3559
SH	FL	rs4401680	G	T	6	140164286	3.62128e-05	16.729	54.4486	4.79954e-11	0.8283
SH	FL	rs4415953	A	G	14	80943372	3.40154e-05	15.7139	54.4486	3.59998e-10	0.0975394
SH	FL	rs4421120	A	G	5	32763118	0.000174068	80.4243	54.4486	2.29985e-46	0.9775
SH	FL	rs4541010	C	T	15	62207619	5.65236e-05	26.1124	54.4486	3.59998e-16	0.593999
SH	FL	rs45446698	G	T	7	99332948	8.87943e-05	41.022	54.4486	1.80011e-24	0.716401
SH	FL	rs4545829	A	G	16	80005642	3.06911e-05	14.1781	54.4486	2.90001e-09	0.1141
SH	FL	rs45474992	T	C	19	47724564	4.50439e-05	20.8089	54.4486	8.4004e-13	0.2747
SH	FL	rs45478299	A	G	7	87111321	3.40332e-05	15.7221	54.4486	2.69998e-10	0.109
SH	FL	rs45601237	A	G	1	31196255	2.59488e-05	11.9873	54.4486	3.2e-08	0.4224
SH	FL	rs4630854	G	A	21	47437220	2.90558e-05	13.4227	54.4486	7.59994e-09	0.01003
SH	FL	rs467022	T	C	5	55805639	3.07163e-05	14.1897	54.4486	1.7e-09	0.5175
SH	FL	rs4735769	C	A	8	78104676	0.000326125	150.702	54.4486	9.30037e-85	0.8186
SH	FL	rs4756786	A	C	11	14285900	4.78945e-05	22.1258	54.4486	7.50067e-14	0.8415
SH	FL	rs4788218	C	T	16	30055750	0.000119104	55.0265	54.4486	6.09958e-32	0.6962
SH	FL	rs4788891	G	A	17	73391145	8.39475e-05	38.7826	54.4486	3.50026e-23	0.5634
SH	FL	rs4814656	A	G	20	17769540	6.35409e-05	29.3545	54.4486	5.10035e-18	0.4013
SH	FL	rs4870056	A	G	6	152162227	0.000255434	118.028	54.4486	3.19963e-68	0.8869
SH	FL	rs4887952	A	G	16	78347216	5.4521e-05	25.1872	54.4486	1.9002e-15	0.5261
SH	FL	rs4906203	T	C	14	102928991	9.49207e-05	43.8526	54.4486	8.80035e-26	0.0909201
SH	FL	rs4908774	A	G	1	8770696	2.81754e-05	13.0159	54.4486	7.10003e-09	0.0431797
SH	FL	rs4926633	C	T	1	54887567	7.50146e-05	34.6554	54.4486	4.00037e-21	0.0477595
SH	FL	rs4944961	T	C	11	74559481	2.58544e-05	11.9437	54.4486	3.79997e-08	0.567799
SH	FL	rs4974930	C	A	4	39238456	3.89607e-05	17.9985	54.4486	4.30031e-11	0.3638
SH	FL	rs4974968	T	C	4	40172933	6.76719e-05	31.263	54.4486	7.89951e-19	0.5866
SH	FL	rs4982404	T	C	14	21539684	0.000124963	57.7338	54.4486	3.59998e-33	0.703399
SH	FL	rs4986172	T	C	17	43216281	0.000206799	95.5503	54.4486	1.80011e-54	0.0844306
SH	FL	rs498685	C	T	18	13088673	7.42136e-05	34.2854	54.4486	1.80011e-20	0.8326
SH	FL	rs505110	A	G	18	331506	5.58484e-05	25.8005	54.4486	5.10035e-15	0.9543
SH	FL	rs508347	C	T	7	28212824	0.000512616	236.923	54.4486	6.69885e-133	0.4191
SH	FL	rs511987	C	T	11	125981569	6.42759e-05	29.694	54.4486	1.69981e-17	0.3358
SH	FL	rs527393	A	G	2	169709757	0.000156301	72.2144	54.4486	2.29985e-42	0.5308
SH	FL	rs52826764	T	C	2	20205541	0.00018971	87.6527	54.4486	6.59933e-51	0.1551
SH	FL	rs55726184	A	G	14	24834971	6.77929e-05	31.3189	54.4486	1.80011e-17	0.3987
SH	FL	rs55749333	T	C	17	7371932	0.000283731	131.106	54.4486	5.19996e-74	0.633299
SH	FL	rs55778236	C	T	5	115022380	0.000124135	57.351	54.4486	1.39991e-33	0.9274
SH	FL	rs55914260	T	C	18	29745501	3.56828e-05	16.4842	54.4486	1.40001e-10	0.697999
SH	FL	rs55944294	A	C	6	18993264	3.51347e-05	16.231	54.4486	9.79941e-11	0.5097
SH	FL	rs55998444	C	T	2	128119846	2.83377e-05	13.0909	54.4486	6.69993e-09	0.713099
SH	FL	rs56011514	G	A	4	109456614	7.85111e-05	36.2709	54.4486	7.50067e-22	0.5117
SH	FL	rs56077950	T	C	4	122721412	0.000130347	60.2213	54.4486	3.19963e-35	0.532299
SH	FL	rs56400819	G	A	8	143925374	4.94685e-05	22.853	54.4486	2.99985e-14	0.5252
SH	FL	rs56694848	A	G	9	691909	3.38677e-05	15.6456	54.4486	3.59998e-10	0.554201
SH	FL	rs57240476	T	C	17	44195432	3.19148e-05	14.7434	54.4486	1e-09	0.4365
SH	FL	rs57519358	G	A	2	218595240	7.00905e-05	32.3804	54.4486	9.3994e-20	0.0261403
SH	FL	rs58087925	T	C	14	105983096	5.74592e-05	26.5447	54.4486	5.30029e-16	0.1539
SH	FL	rs591269	T	C	6	140227929	3.0054e-05	13.8838	54.4486	2.1e-09	0.635501
SH	FL	rs59407416	T	G	10	23779283	5.20882e-05	24.0633	54.4486	7.00003e-15	0.7142
SH	FL	rs595767	G	A	17	46957987	0.000222082	102.613	54.4486	3.19963e-58	0.05021
SH	FL	rs59735916	T	C	12	94385877	4.21189e-05	19.4576	54.4486	2.60016e-12	0.4247
SH	FL	rs59951000	T	C	18	74975828	3.68514e-05	17.024	54.4486	6.79986e-11	0.605701
SH	FL	rs59985551	T	C	2	56106928	0.000877404	405.671	54.4486	1e-200	0.4452
SH	FL	rs6010778	C	T	20	61522019	4.09781e-05	18.9305	54.4486	5.30029e-12	0.227
SH	FL	rs60131767	A	G	4	186703959	3.82065e-05	17.6501	54.4486	1.99986e-11	0.4912
SH	FL	rs6020201	A	C	20	48634762	6.00466e-05	27.7401	54.4486	7.39946e-17	0.4014
SH	FL	rs6024734	T	C	20	54830299	5.04608e-05	23.3114	54.4486	2.80027e-14	0.2946
SH	FL	rs60655524	A	G	8	67503514	3.74188e-05	17.2862	54.4486	4.00037e-11	0.4647
SH	FL	rs6071822	A	G	20	38472158	4.2206e-05	19.4978	54.4486	2.29985e-12	0.316
SH	FL	rs6082358	T	C	20	21230455	6.92071e-05	31.9723	54.4486	6.70039e-19	0.8153
SH	FL	rs6119945	A	G	20	31329256	5.20116e-05	24.0279	54.4486	1.69981e-14	0.690699
SH	FL	rs61635866	C	T	9	78555995	3.53076e-05	16.3109	54.4486	1.40001e-10	0.554201
SH	FL	rs61729527	T	C	8	77761919	5.41083e-05	24.9966	54.4486	1.9002e-15	0.354
SH	FL	rs61732778	A	G	3	187443314	0.000146061	67.4825	54.4486	1.9002e-39	0.4211
SH	FL	rs61776719	A	C	1	38461319	0.000132078	61.0213	54.4486	4.49987e-36	0.604
SH	FL	rs61849823	C	T	10	53290991	8.23285e-05	38.0346	54.4486	2.39994e-22	0.6107
SH	FL	rs61950149	C	T	13	21543502	9.75469e-05	45.066	54.4486	2.29985e-25	0.1811
SH	FL	rs61987429	T	C	14	65606248	0.000131834	60.9085	54.4486	1e-34	0.05427
SH	FL	rs62090043	C	T	17	1627704	7.07987e-05	32.7076	54.4486	1.39991e-19	0.9227
SH	FL	rs62274159	C	T	3	156885773	7.92113e-05	36.5944	54.4486	4.90004e-22	0.0952994
SH	FL	rs62289317	T	G	4	7858189	3.94296e-05	18.2151	54.4486	1.59993e-11	0.9718
SH	FL	rs62294340	A	G	3	169155476	3.9857e-05	18.4126	54.4486	7.00003e-12	0.0891107
SH	FL	rs62337444	T	C	4	144524940	4.61092e-05	21.301	54.4486	2.49977e-13	0.483499
SH	FL	rs62338304	A	G	4	149719861	2.64306e-05	12.2099	54.4486	2.90001e-08	0.1654
SH	FL	rs62370473	A	G	5	52767121	4.37697e-05	20.2202	54.4486	8.10028e-13	0.685499
SH	FL	rs62423399	A	C	6	169030032	3.04976e-05	14.0887	54.4486	1.89998e-09	0.01269
SH	FL	rs62473545	A	G	7	130636493	5.88307e-05	27.1783	54.4486	1.29987e-16	0.0559101
SH	FL	rs62501195	C	A	8	24041988	0.000234119	108.176	54.4486	1.50003e-59	0.8793
SH	FL	rs62515437	T	G	8	57160328	0.000338026	156.203	54.4486	8.4004e-88	0.1926
SH	FL	rs62621197	T	C	19	8670147	0.000751021	347.193	54.4486	8.99498e-178	0.2381
[truncated: 3,535 more rows]

## Sheet: Table7
Table 7 - Mediating effects of BMR on causality between WBFFM, SH and FL.
Exposuer	TE(95% CI)	β1(95% CI)	IE(95% CI)	p-value	ME proportion（%）95% CI
WBFFM	0.732(0.198-1.267)	0.244(-0.434-0.923)	0.487(0.069-0.910)	0.022	66.617%(34.983-71.559)
SH	0.339(0.014-0.664)	0.156(-0.204-0.516)	0.182(0.027-0.337)	0.021	53.909(193.583-50.971)
